# Supplementary material
Source: PubMed Central journal article supplement (PMC3328300)
Supplement: NIHMS345676-supplement-01.pdf [file NIHMS345676-supplement-01.pdf]

Type of file: figure

Label: Supplementary Information

Filename: nature10334-s1.pdf

**Primers used in this study***Mouse RT-qPCR primers (written 5' to 3')*

Brd4: CCATGGACATGAGCACAATC and TGGAGAACATCAATCGGACA  
Ccl4: CCCGAGCAACACCATGAAG and CCACGAGCAAGAGGAGAGAGA  
Cd74: CCAACGCGACCTCATCTCTAA and AGGGCGGTTGCCAGTA  
Gapdh: TTCACCACCATGGAGAAGGC and CCCTTTTGGCTCCACCCT  
Itgax: CCAGGTTGCCAGTGAGAA and CTCAGATGGGCGGGTTCA  
Mmp9: CATTGCGTGGATAAGGAGT and TCACACGCCAGAAGAATTTG  
Myc: GCCGATCAGCTGGAGATGA and GTCGTCAGGATCGCAGATGAAG

*Human RT-qPCR primers (written 5' to 3')*

BRD4: CCCCTCGTGTTGGTGAAG and GCTCGCTGCGGATGATG  
GAPDH: CCTGACCTGCCGTCTAGAAA and CTCCGACGCCTGCTTCAC  
MYC: AGGGATCGCGCTGAGTATAA and TGCCTCTCGCTGGAATTACT

*Mouse Myc ChIP primers (written 5' to 3')*

Myc -3.8kb: TGTGGCTTTCCTGTCCTTTT and AGGGGACATCCCCATTTTAC  
Myc -2.2kb: ATTCATTTTCCCCATCCACA and TTGCAAAGAGGGGGAGTAGA  
Myc -1.9kb: ACAAATCCGAGAGCCACAAC and AACACCAAGAGCCACCAATC  
Myc -1.8kb: GGTGGCTCTTGGTGTTTGAG and TCGAGCTCATTGCACAATTC  
Myc -1.7kb: CAACTTTGAACAATGAGCACCT and CTCTCACTGCTACCCGGTTT  
Myc -1.5kb: CGAGGAGTCCGGAATAAGAA and TCTTTTGCTCTGTGCATTGG  
Myc -1kb: GCCTCTTGTGAAAACCGACT and CCGGTCTACACCCCATACAC  
Myc +1kb: TGGAATCCTGAGGTCTTTGG and CAGAAATGCACCAAGCTGAA  
Myc +1.5kb: CCCTCCCCTTTTATTTTCGAG and GCTTTTCTTTCCGATTGCTG  
Myc +3.7kb: TGCTTTGGGTGTGTCTGAAG and CTCCCAGAAAGGCAGAACAG

## 243 genes involved in chromatin modification

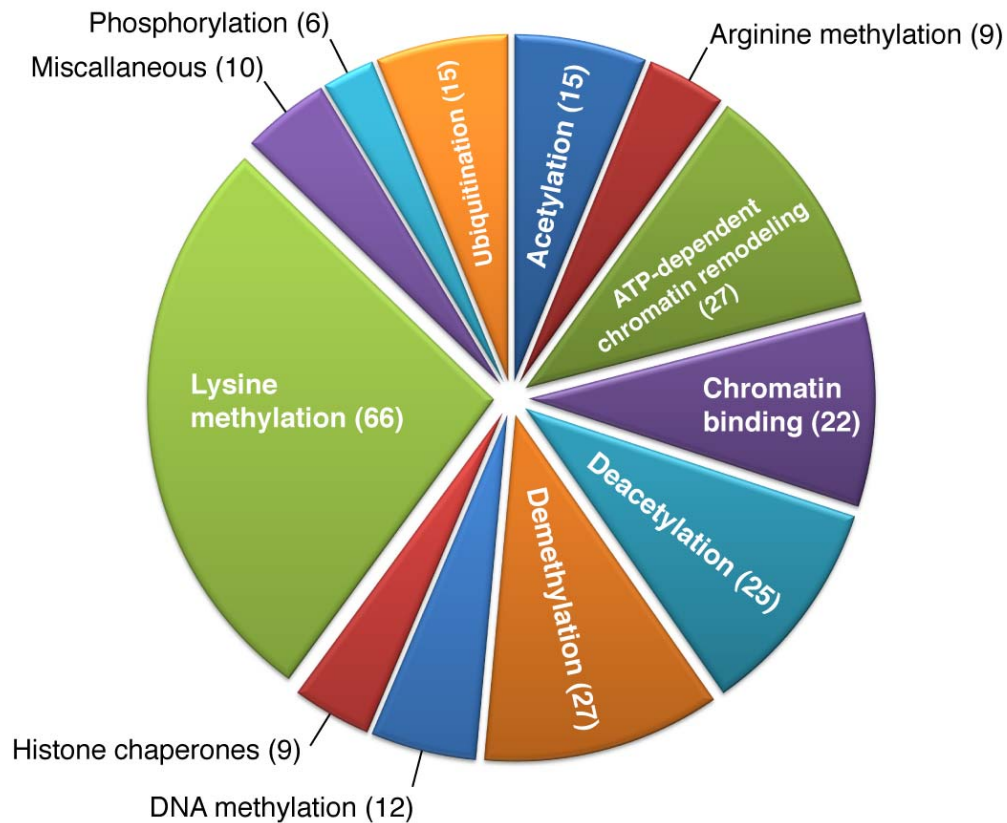

**Supplementary Figure 1. Categories of chromatin regulators evaluated in the RNAi screen.** Numbers indicate the number of genes in each category. For each gene, 6 shRNAs were designed using the BIOPREDsi algorithm<sup>1</sup>, and adapted for the miR30-context. The library was constructed using large-scale on-chip oligonucleotide synthesis, followed by pooled PCR cloning and sequence verification of individual clones, which yielded a total of 1094 shRNAs (3-6 per gene). All shRNA sequences are provided in Supplementary Table 1.

**a****Tet-on competent AML model**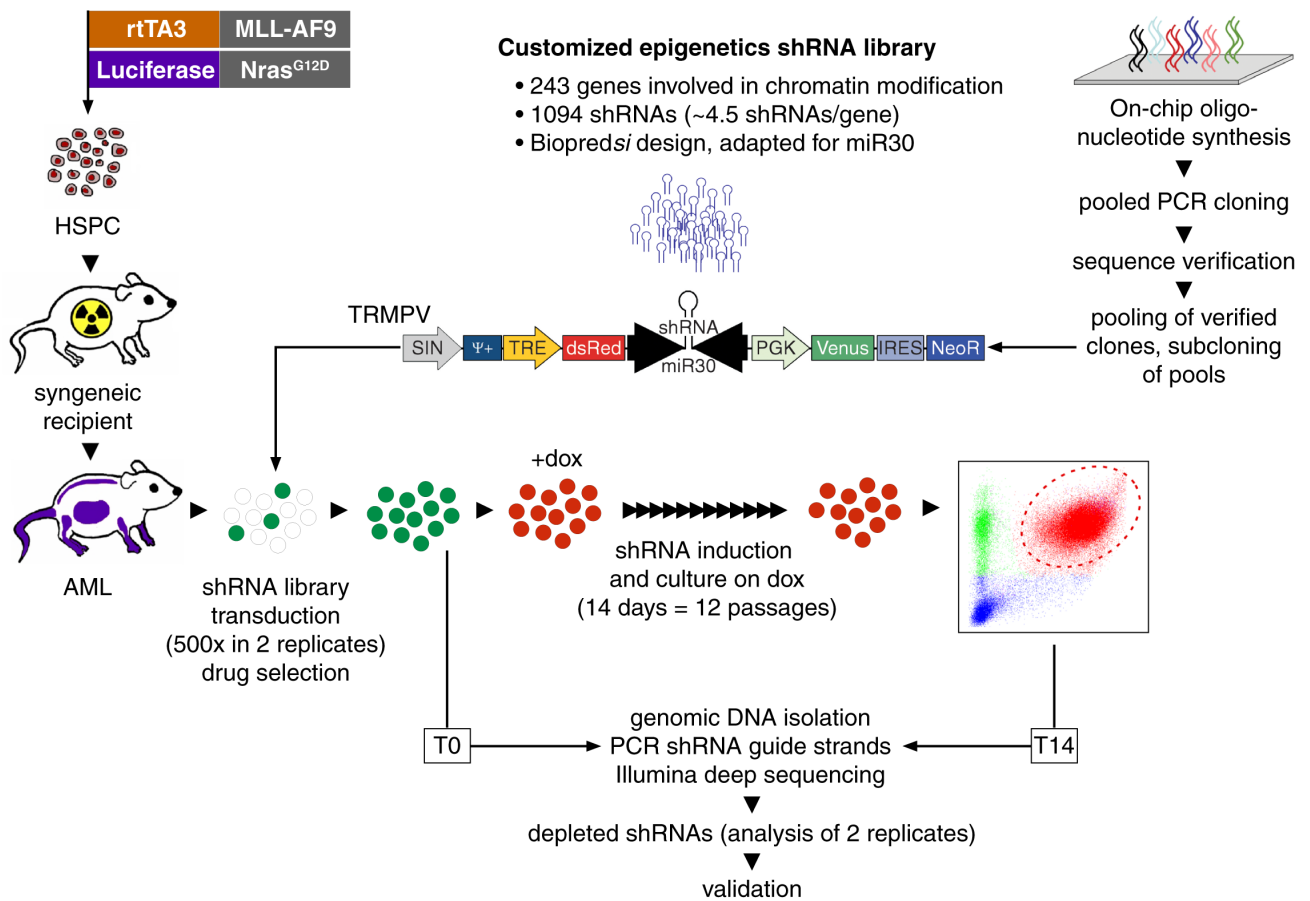**b**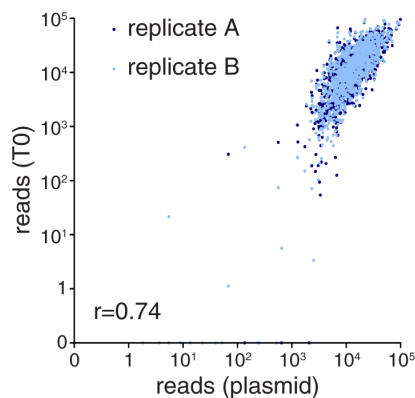**c**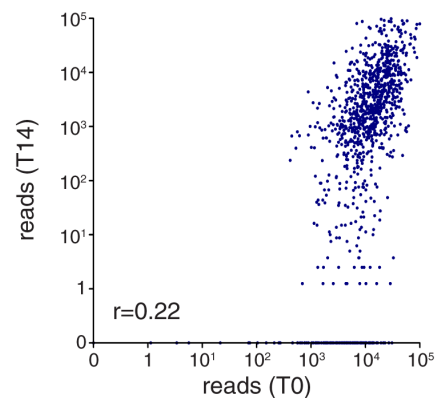**d**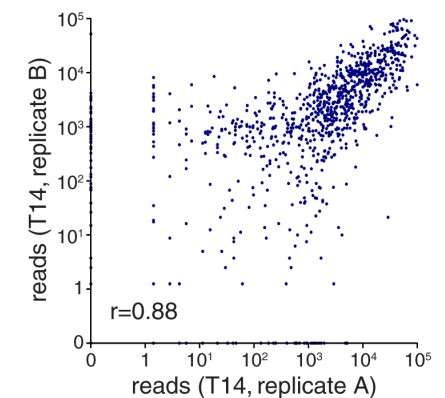

**Supplementary Figure 2. RNAi screening strategy.** **a)** The screen was performed in a Tet-on competent AML model generated by retroviral cotransduction of vectors encoding rtTA3-IRES-MLL-AF9 and Luciferase-IRES-Nras<sup>G12D</sup> into hematopoietic stem and progenitor cells (HSPC). Leukemic cells retrieved from terminally ill mice were placed in culture and utilized for the screen. A customized shRNA library targeting chromatin regulating genes was synthesized using On-chip oligonucleotide synthesis, and cloned in a pooled format. A library pool of 1094 sequence verified shRNAs was subcloned into TRMPV-Neo<sup>2</sup> and transduced into leukemia cells, followed by G418 selection. The selected cell population (T0) was then treated with doxycycline for 14 days (equivalent to 12 cell passages), followed by FACS isolation of Venus+/dsRed+ (shRNA-expressing) cells (T14). Genomic DNA isolated from T0 and T14 populations was used as a template for PCR amplification of shRNA guide

strands, which were subjected to deep-sequencing to quantify the relative abundance of each shRNA in the library. Top hits were defined in the screen as genes for which at least two shRNA showed >20fold depletion in 2 independent replicates. 38 genes satisfied these criteria and were subjected to 1-by-1 validation using a different MLL-AF9/Nras<sup>G12D</sup> induced AML cell line and a constitutive shRNA expression vector (LMN). **b)** Scatter plot illustrating the correlation of normalized reads per shRNA between the plasmid pool and two replicates of library transduced leukemia cells following drug selection (T0). The correlation verifies that the library representation is largely unaffected by retroviral transduction and drug selection. **c)** Scatter plot of normalized reads per shRNA in T0 compared to T14 in one replicate. The low correlation suggests substantial changes in shRNA representation. **d)** Scatter plot illustrating the correlation of normalized reads per shRNA at T14 in 2 independent replicates. The high correlation indicates that changes in shRNA abundance are due to specific effects. *r*, Pearson correlation coefficient.

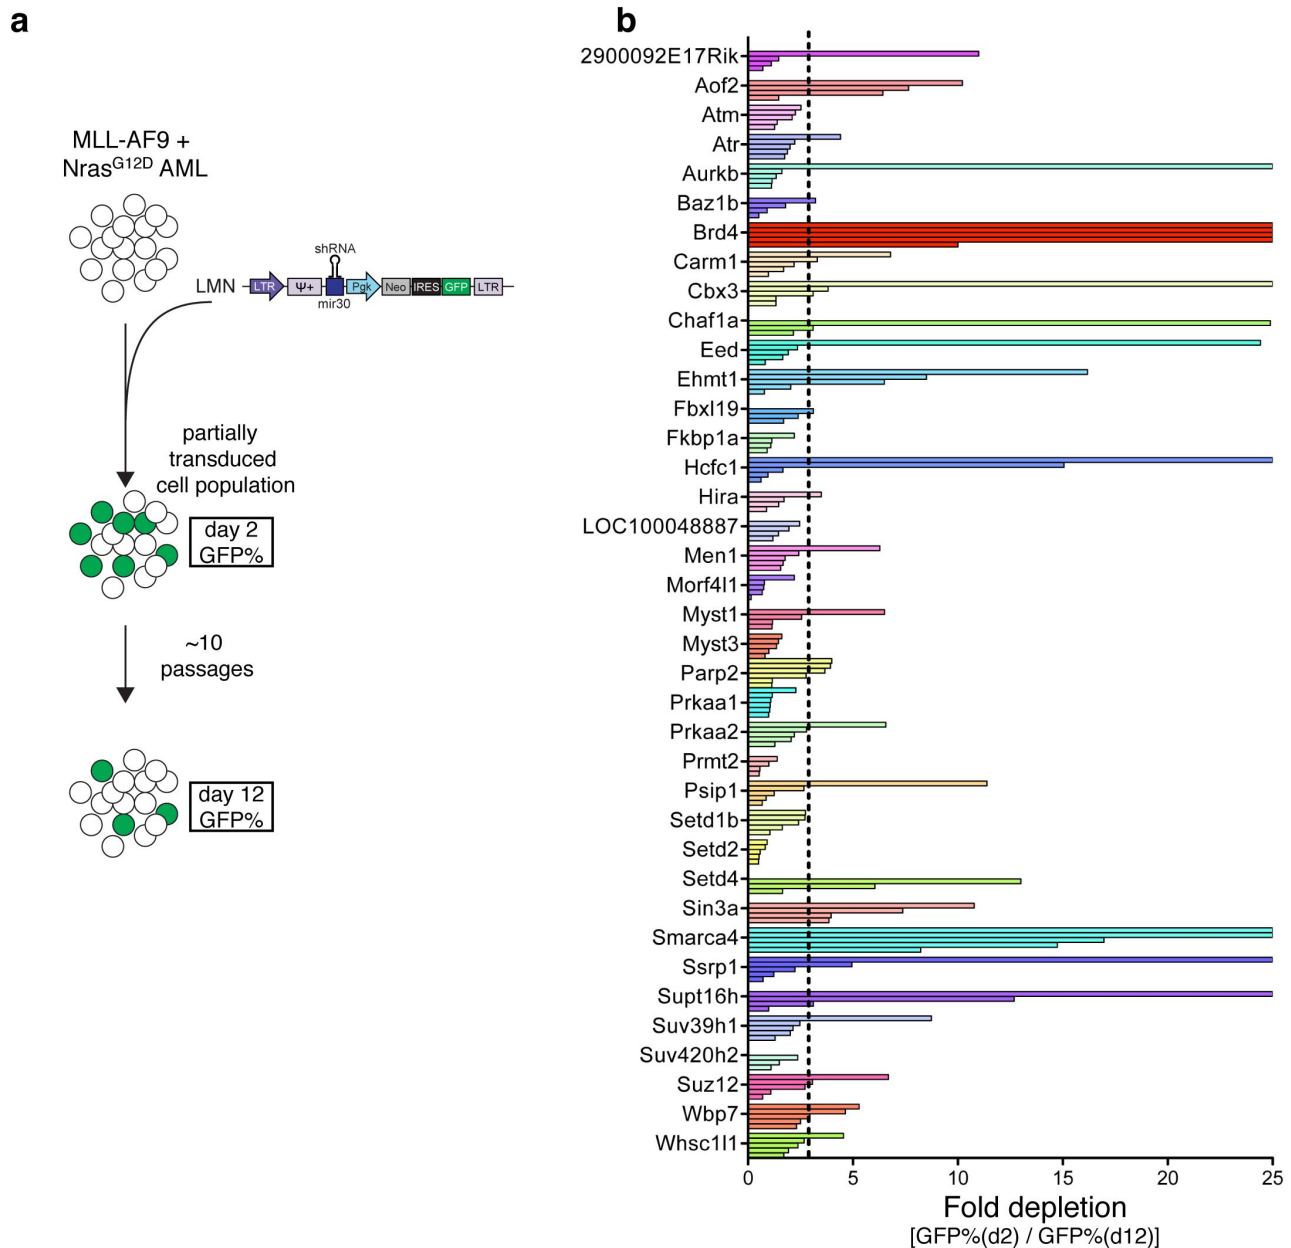

**Supplementary Figure 3. Screen validation strategy. a)** For all genes scoring in the primary pooled screen (criteria: at least 2 shRNAs depleted >20fold in 2 independent replicates), all shRNAs designed to target that gene were validated in an independently derived MLL-AF9/Nras<sup>G12D</sup> leukemia cell line using the LMN vector, which expresses miR30-shRNAs under control of the constitutive LTR promoter and features GFP and NeoR reporters. LMN-shRNAs were transduced into leukemia cells with an average infection efficiency of 20%. The relative change in GFP% was monitored over 10 days by flow cytometry and used as a readout of cell growth inhibition, plotted as fold depletion [GFP%(d2) / GFP%(d12)]. **b)** The fold depletion of all LMN-shRNAs targeting the 38 identified hits in the primary screen. The dotted line represents a three-fold depletion cutoff. Several genes failed to validate, which might be due to (i) true false-positives in the primary screen, (ii) variable effects in the independent leukemia line, (iii) differences in the shRNA expression system. Based on the total number of identified shRNAs displaying maximum depletion (25-fold), Brd4 (shown in red) was identified as the top hit in the screen.

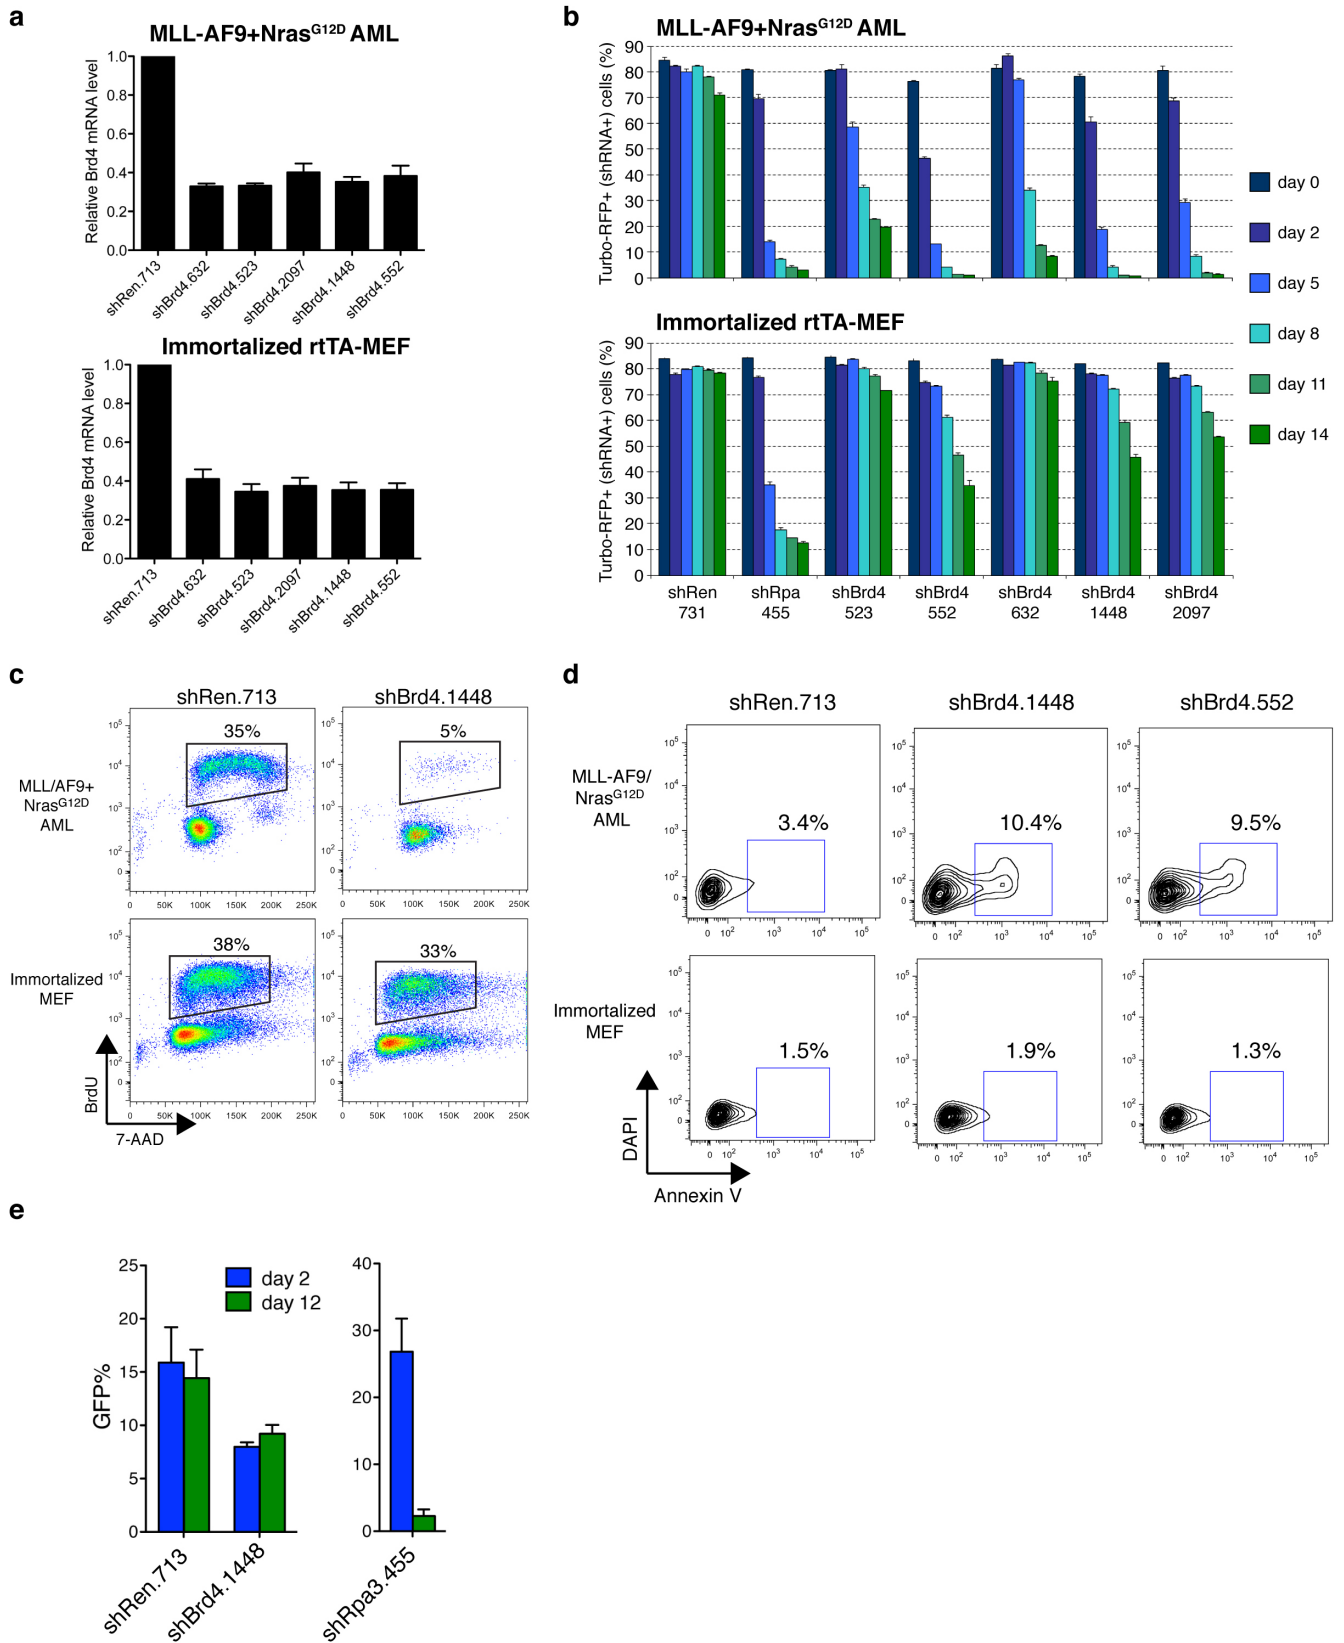

**Supplementary Figure 4. Comparison of Brd4-shRNA effects in leukemia, MEF, and G1E cells.** Dox inducible shRNAs in the TtTMPV vector were transduced into Tet-On competent leukemia and MEF cultures, followed by G418 selection. Leukemia cells were treated with 1  $\mu$ g/ml dox, while MEFs were treated with 2  $\mu$ g/ml to ensure that knockdown would be equivalent or greater in MEF. **a)** RT-qPCR of Brd4 mRNA levels following 48

hours of dox treatment. (n=4). Error bars represent s.e.m. **b)** Competitive proliferation assays. Selected cells were mixed with untransduced cells at an 8:1 ratio, and subsequently cultured in the presence of dox. The relative percentage of Venus+/TurboRFP+ (shRNA expressing) cells was determined at indicated time points and changes used to readout growth inhibitory effects. (n=3). Error bars represent s.e.m. **c)** Representative flow cytometry plots showing cell cycle analysis (BrdU/7-AAD double staining) of cells in b) after 5 days of dox treatment. Events are gated on Venus+/TurboRFP+ (shRNA+) cells. The experiment was performed three times with similar results; a representative experiment is shown. **d)** Apoptosis measurement using Annexin V/DAPI double staining of cells in b) after 5 days of dox treatment. To specifically analyze shRNA-mediated apoptosis induction, the primary gating was applied to viable shRNA-expressing cells (FSC/SSC; Venus+/TurboRFP+), which accounts for the lack of accumulated dead (Annexin V+/DAPI+) cells. The experiment was performed twice and one representative experiment is shown. **e)** GFP depletion of LMN-shRNAs performed in G1E as depicted in Supplementary Fig. 3a. (n = 3). Error bars represent s.e.m.



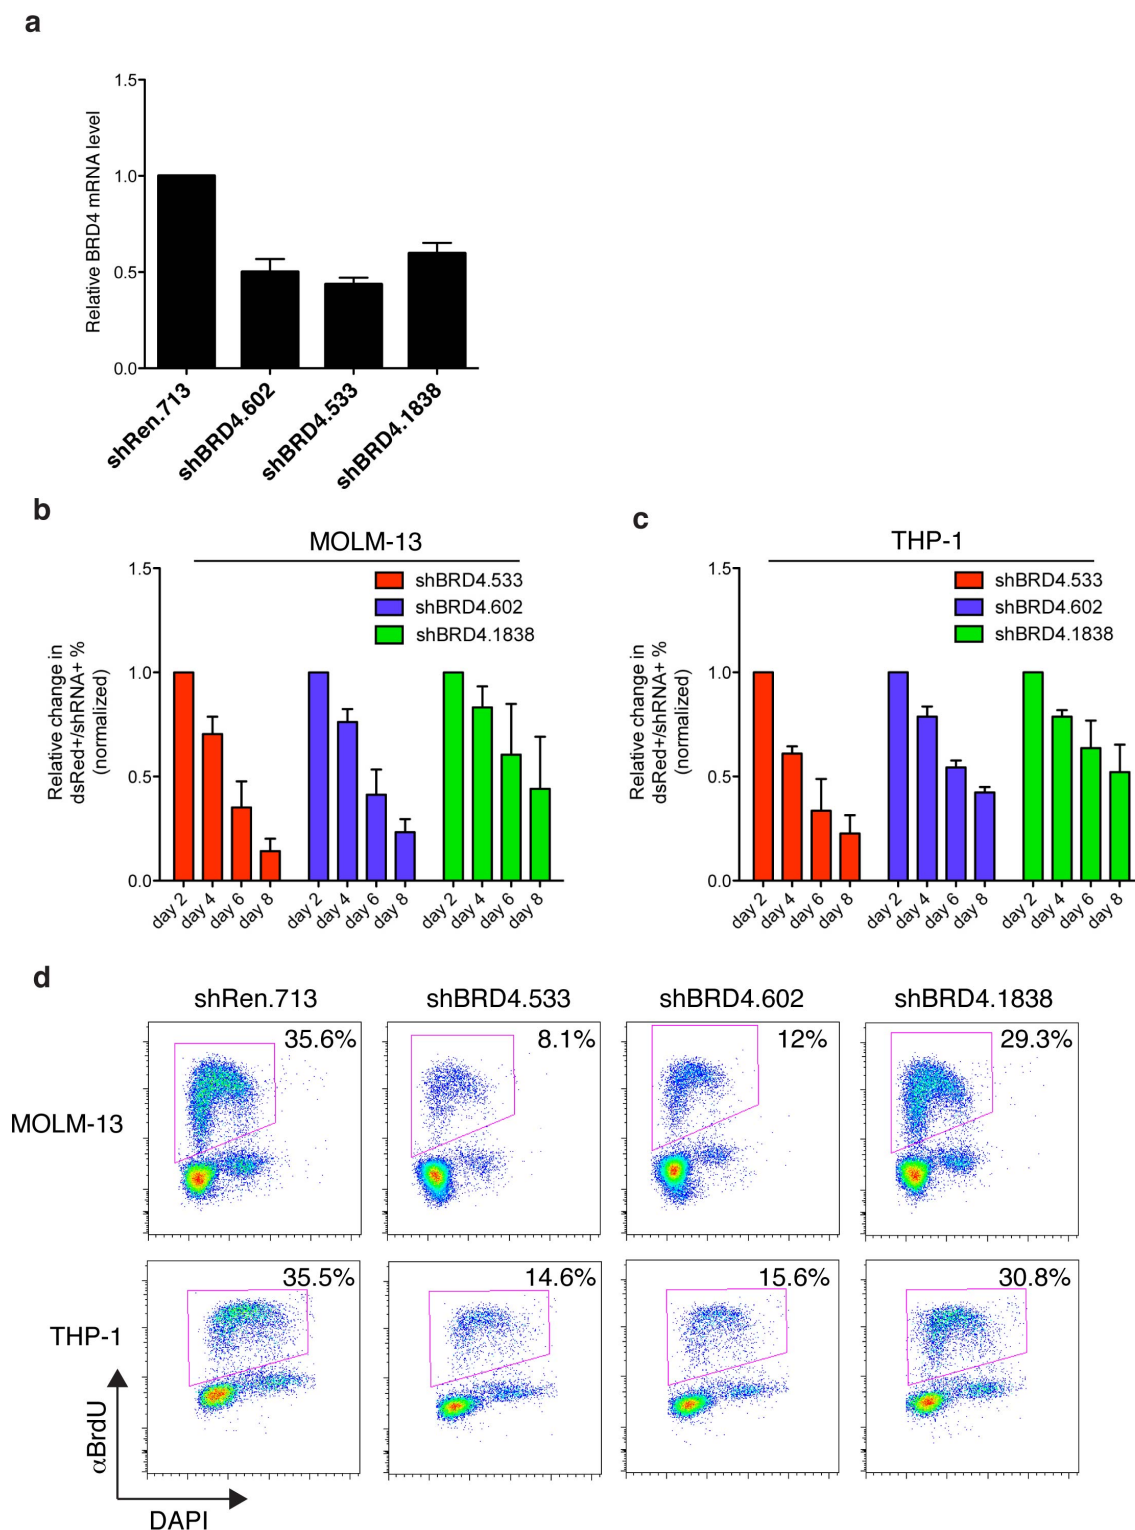

**Supplementary Figure 5. shRNA knockdown of BRD4 is sufficient to inhibit growth of human AML cell lines THP-1 and MOLM-13.** shRNAs targeting human BRD4 were cloned into the TRMPV-Neo vector, followed by retroviral transduction of Eco-receptor+/Tet-ON competent human AML cell lines THP-1 and MOLM-13. Cells were selected with G418 for 1 week. **a)** Knockdown efficiency of BRD4 upon conditional RNAi suppression. RT-qPCR was performed on TRMPV-MOLM-13 lines following 48 hours of dox treatment (n=3). Error bars represent s.e.m. **b & c)** Competitive proliferation assays of MOLM-13 and THP-1. Selected cells were mixed

with untransduced cells and subsequently cultured in the presence of dox. The relative percentage of dsRed+/shRNA+ cells was determined at indicated time points and changes were used to measure growth inhibitory effects. Results are the average of two independent experiments. All results are normalized to a control shRNA (shRen.713). Error bars represent s.e.m. **d)** Representative flow cytometry plots showing cell cycle analysis (BrdU/DAPI double staining) in cells in (b and (c) after 5 days of dox treatment. Events are gated on dsRed+/shRNA+ cells.

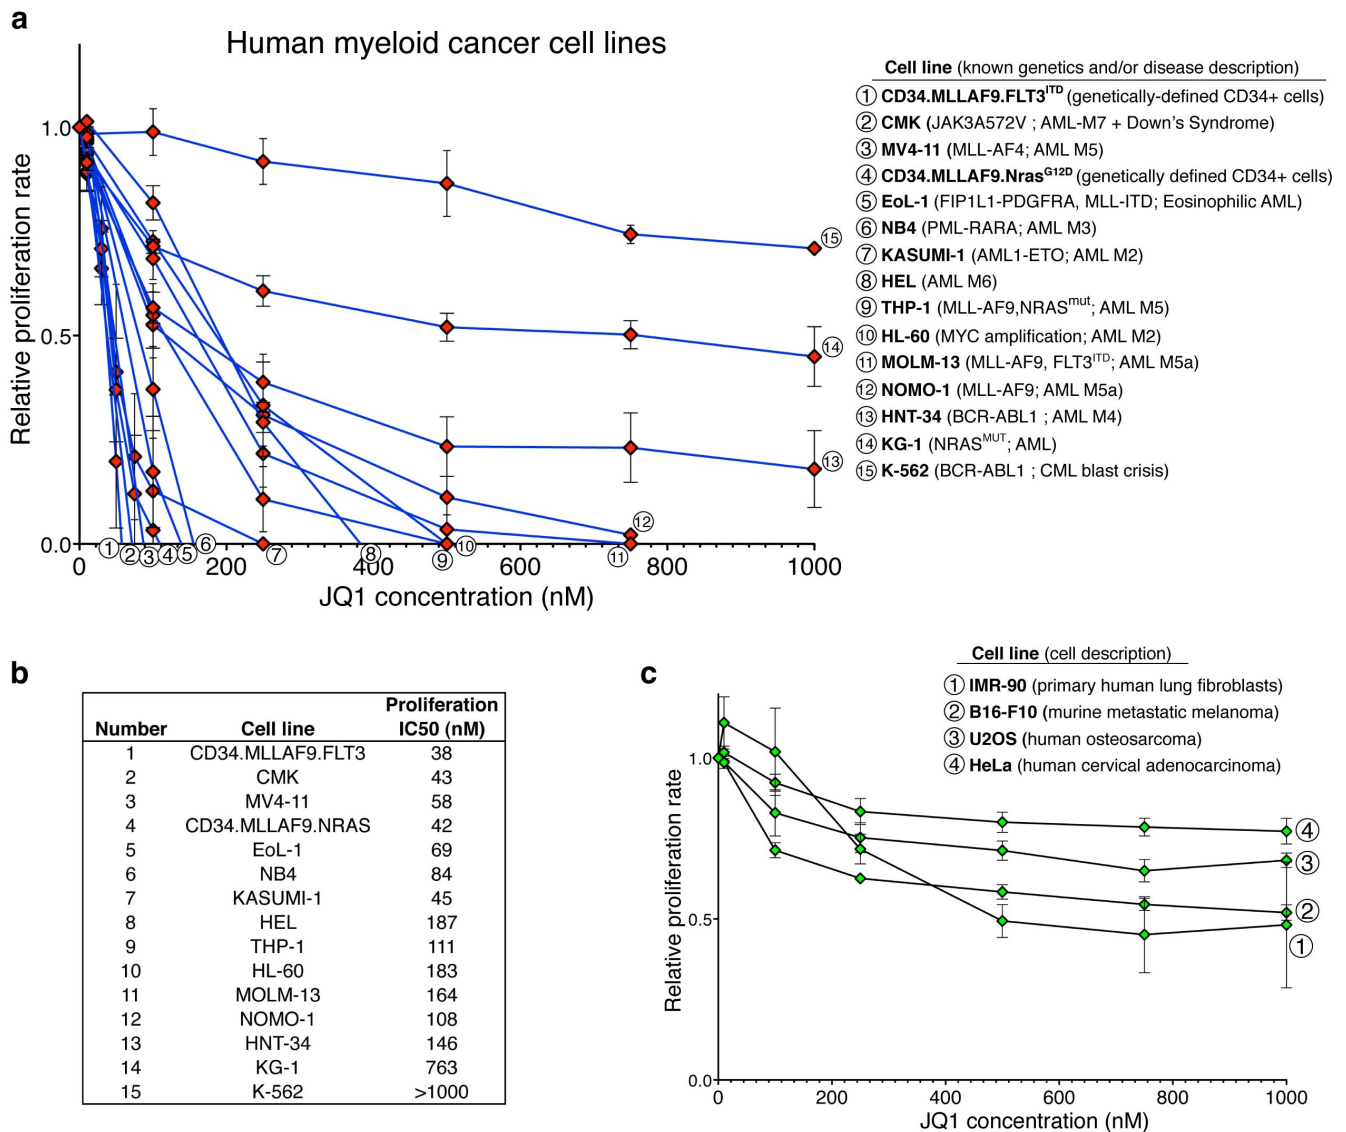

**Supplementary Figure 6. JQ1 displays a broad anti-leukemia activity in diverse human AML cell lines. a)** Proliferation rates of JQ1 treated human leukemia cell lines. Disease classification and genetic information about leukemia cell lines was obtained from the “Guide to Leukemia-Lymphoma Cell Lines” eBook<sup>3</sup>, a gift from H.G. Drexler. Proliferation rates were calculated by measuring the increase in viable cell number after 3 days in culture and fitting data to an exponential growth curve. Results are normalized to the proliferation rate of control (DMSO treated) cells, set to 1. (n = 3). Error bars represent s.e.m. **b)** Table summarizing the JQ1 IC50 using the data shown in (a). A majority of human myeloid leukemia cell lines display an IC50 < 500 nM. **c)** Proliferation rates of JQ1 treated adherent cell lines. Calculated as in (a).

a

| AML: F/M | Age | FAB | WHO | WBC<br>10 <sup>9</sup> /L | % Blast cells |     | Karyotype | Mutations           |                            |
|----------|-----|-----|-----|---------------------------|---------------|-----|-----------|---------------------|----------------------------|
|          |     |     |     |                           | PB            | BM  |           |                     |                            |
| 1*       | F   | 32  | M1  | AML with t(9;11)          | 0.4*          | 80% | 73%       | 46,XX,t(9;11)       | MLL1-AF9                   |
| 2        | M   | 61  | M5  | AML monoblastic           | 35.1          | 33% | 72%       | 46,XY,t(11;17)      | MLL1-MSF                   |
| 3        | M   | 65  | M5  | AML with t(9;11)/NPM1m    | 94.8          | 6%  | 90%       | 47,XY,t(9;11),+8    | MLL1-AF9, FLT3-D835, NPM1m |
| 4        | M   | 80  | M4  | AML with NPM1m            | 198.5         | 25% | 52%       | 46,XY               | FLT3 ITD, KIT D816V, NPM1m |
| 5        | M   | 54  | M1  | AML with NPM1m            | 361.5         | 95% | 92%       | 46,XY               | FLT3 ITD, NPM1m            |
| 6        | F   | 49  | M4  | AML myelomonocytic        | 15.4          | 16% | 63%       | 46,XX               | FLT3 ITD                   |
| 7        | M   | 67  | M1  | AML with myelodysplasia   | 74.6          | 95% | 84%       | complex             | -                          |
| 8*       | F   | 61  | M5  | AML with myelodysplasia   | 82.1*         | 77% | 74%       | 46,XX,del12p,del20q | -                          |
| 9        | F   | 39  | M5  | AML monoblastic           | 37.7          | 65% | 94%       | 47,XX,t(3;11),+8    | -                          |
| 10       | F   | 49  | M4  | AML with inv16            | 94.2          | 47% | 57%       | 46,XX,inv16         | FLT3 ITD                   |
| 11       | M   | 58  | M2  | AML with t(8;21)          | 100           | 60% | 58%       | 46,XY,t(8;21)       | -                          |
| 12       | M   | 23  | M2  | AML with t(8;21)          | 13.7          | 52% | 59%       | 45,X,-Y,t(8;21)     | -                          |

b

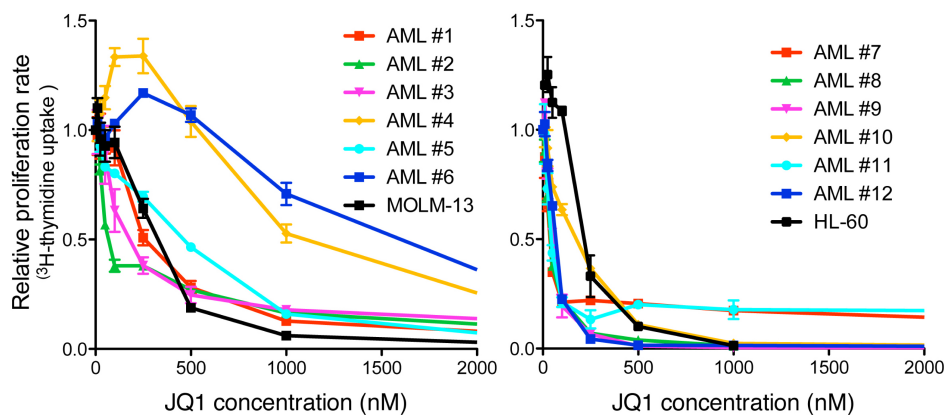

c

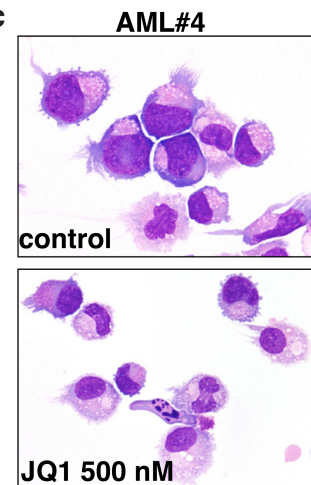

d

| AML:   | source | 3H-thymidine-uptake      |                         | Induction of Apoptosis**                 |              | Maturation      |
|--------|--------|--------------------------|-------------------------|------------------------------------------|--------------|-----------------|
|        |        | +cytokines*<br>IC50 (nM) | -cytokines<br>IC50 (nM) | % Apoptotic Cells (Giemsa)<br>500 nM JQ1 | 1,000 nM JQ1 |                 |
| 1      | PB     | 280                      | n.t.                    | n.t.                                     | n.t.         | n.t.            |
| 2      | BM     | 90                       | 70                      | 14                                       | 22           | + (macrophage)  |
| 3      | BM     | 160                      | 240                     | n.t.                                     | n.t.         | n.t.            |
| 4      | PB     | 1030                     | 420                     | 14                                       | 18           | ++ (macrophage) |
| 5      | BM     | 420                      | n.t.                    | 30                                       | 50           | + (myeloid)     |
| 6      | BM     | 1420                     | 140                     | 14                                       | 37           | ++ (myeloid)    |
| 7      | BM     | 40                       | n.t.                    | 23                                       | 28           | + (myeloid)     |
| 8      | PB     | 40                       | 50                      | 33                                       | 27           | -               |
| 9      | BM     | 50                       | 50                      | n.t.                                     | n.t.         | n.t.            |
| 10     | BM     | 150                      | 60                      | 36                                       | 55           | ++ (macrophage) |
| 11     | BM     | 40                       | n.t.                    | n.t.                                     | n.t.         | n.t.            |
| 12     | BM     | 60                       | n.t.                    | n.t.                                     | n.t.         | n.t.            |
| HL60   | + ctl  |                          | 200                     |                                          |              |                 |
| MOLM13 | + ctl  |                          | 135                     |                                          |              |                 |

**Supplementary Figure 7. JQ1 sensitivity of patient-derived adult AML samples.** **a)** Table of clinical and pathological information of AML specimens analyzed. \* patients analyzed at relapse. WBC, white blood count; F, female; M, male; FAB, French-American-British cooperative study group; WHO, World Health Organization; PB, peripheral blood; BM, bone marrow; NPM1m, mutated NPM1. **b)** Proliferation curves of JQ1-treated AML specimens, in the presence of cytokines. (n = 3). Error bars represent s.e.m. Relative proliferation rate was determined by measuring 3H-thymidine-uptake and comparing to DMSO treated control. Since this proliferation assay is different from what was employed in Fig. 1 and Supplementary Fig. 6, HL-60 and MOLM-13 lines were

included to ensure that IC50 measurements using thymidine uptake are consistent with measurements obtained from direct counts of viable cells. **c)** Wright-Giemsa cytopsin of AML sample #4, demonstrating morphologic features of macrophage differentiation. **d)** Summary of impact of JQ1 on proliferation (3H-thymidine-uptake), apoptosis (Giemsa stain), and cell maturation (Wright-Giemsa staining). \*Cells were incubated with JQ1 in the presence of G-CSF (100 ng/ml), SCF (100 ng/ml), and IL-3 (100 ng/ml). \*\*The percentage of apoptotic cells was determined on cytopsin slides by Wright-Giemsa staining; percentages of apoptotic cells measured in control medium (usually <10% of cells) was subtracted in each case.

a

| Sample ID | Age    |                  | Molecular/Cytogenetic |
|-----------|--------|------------------|-----------------------|
|           | Group  | Phenotype        |                       |
| PED025    | Infant | MPAL (B/myeloid) | MLL-ENL               |
| PED095    | Infant | MPAL (B/myeloid) | MLL-AF4               |
| PED051    | Child  | AML              | FLT3/ITD              |
| PED004    | Child  | AML              | monosomy 7, BCR-ABL   |
| 801343    | Infant | pre-B ALL        | MLL-ENL               |
| PED063    | Child  | AML              | CBFB-MYH11            |
| MV4-11    | + ctl  | AML              | MLL-AF4, FLT3/ITD     |

b

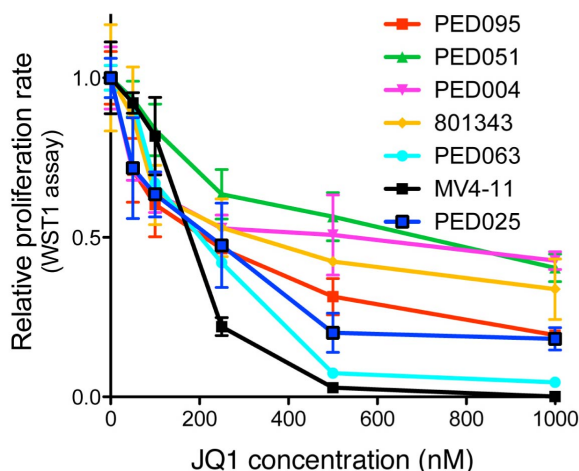

c

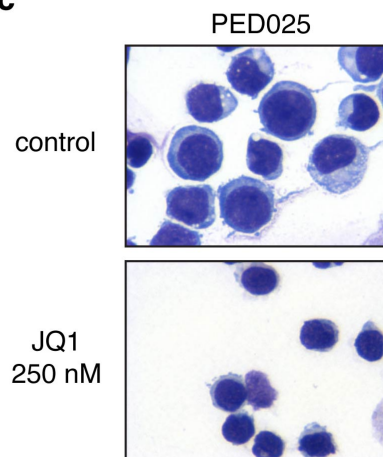

d

| Sample ID | Induction of Apoptosis** |                                    |              | Maturation    |
|-----------|--------------------------|------------------------------------|--------------|---------------|
|           | WST1 IC50 (nM)           | % Apoptotic Cells (AVB) 500 nM JQ1 | 1,000 nM JQ1 |               |
| PED025    | 163                      | 32                                 | 33           | ++ (Lymphoid) |
| PED095    | 174                      | 32                                 | 18           | ++ (Myeloid)  |
| PED051    | 596                      | 21                                 | 24           | -             |
| PED004    | 451                      | 19                                 | 34           | + (Myeloid)   |
| 801343    | 345                      | 13                                 | 20           | ++ (Lymphoid) |
| PED063    | 136                      | 21                                 | 24           | -             |
| MV4-11    | 165                      | 80                                 | 86           | n.t.          |

**Supplementary Figure 8. JQ1 sensitivity of patient-derived pediatric leukemia samples.** **a)** Table summarizing patient leukemia sample information. MPAL, Mixed Phenotype Acute Leukemia. **b)** Proliferation curves of JQ1-treated leukemia specimens ( $n = 3$ ). Error bars represent s.e.m. Relative proliferation rate was determined using the WST1 assay and comparing JQ1 treated cells to DMSO treated controls. Since this proliferation assay is different from what was used in Fig. 1 and Supplementary Fig. 6, MV4-11 cell line was included to ensure that IC<sub>50</sub> measurements are consistent with other findings in this study. **c)** Wright-Giemsa cytopsin of sample PED025, demonstrating features of lymphoid differentiation. Wright-Giemsa staining of cytopsin was performed on specimens treated with 250 nM JQ1 for 48 hours. **d)** Summary of effects of JQ1 on pediatric leukemia samples. Percentages of apoptotic cells measured in control medium was subtracted in each case.

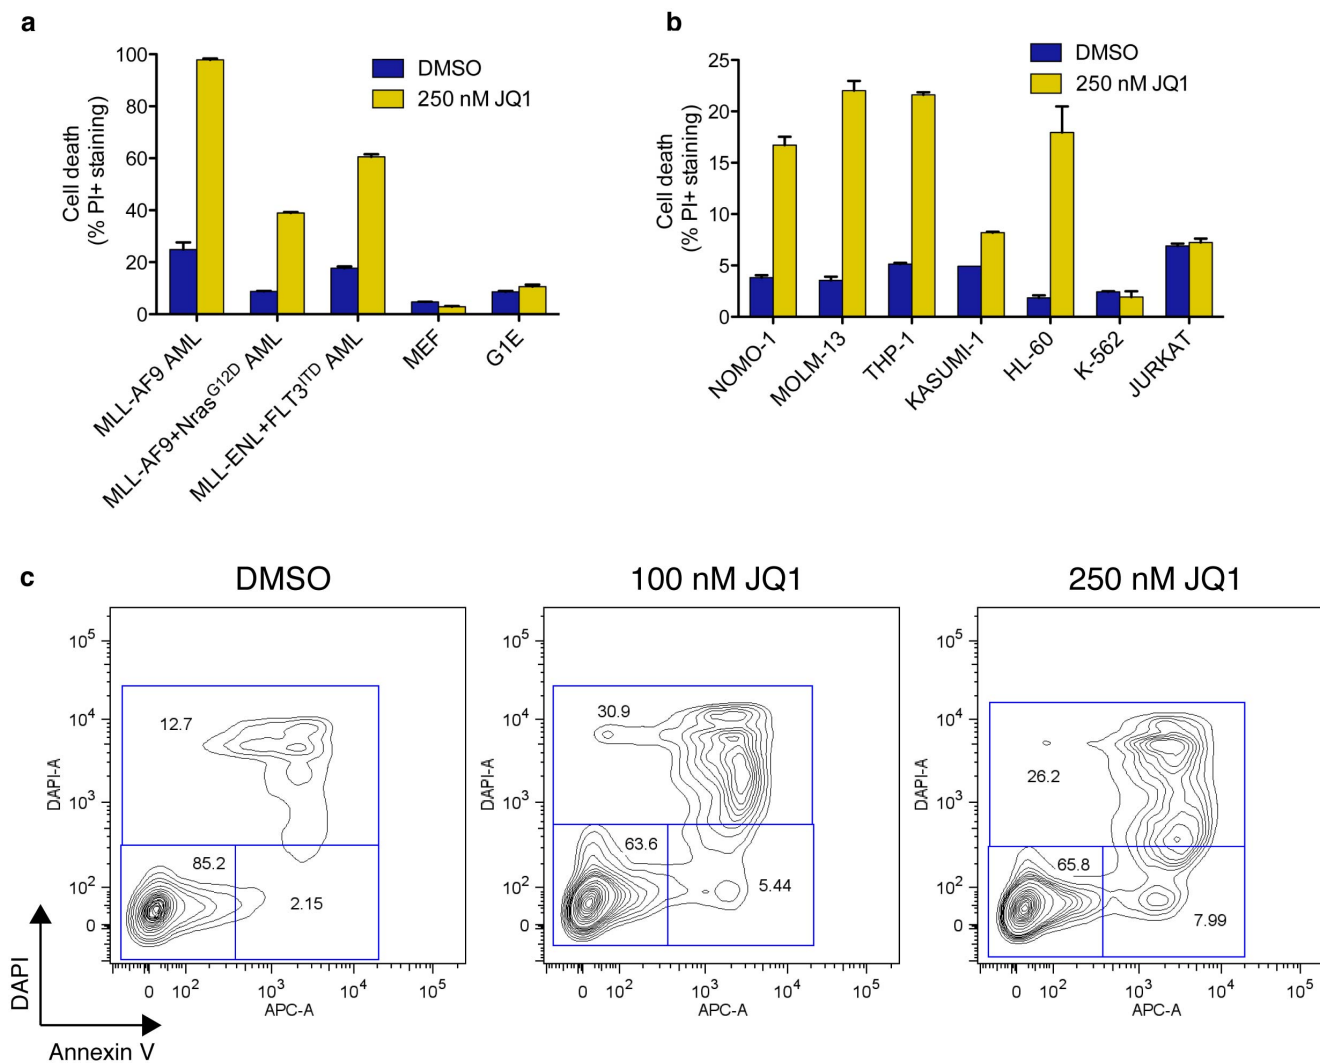

**Supplementary Figure 9. JQ1 treatment leads to apoptosis of leukemic cells. a, b)** Cell death quantitation. Cells were treated with 250 nM JQ1 for 48 hours, followed staining with PI. PI + cells were quantified by flow cytometry. (n=3). Error bars represent s.e.m. **c)** Apoptosis measurement of MLL-AF9/Nras<sup>G12D</sup> leukemia cells treated with JQ1 for 48 hours. (n=3). A representative experiment is shown.

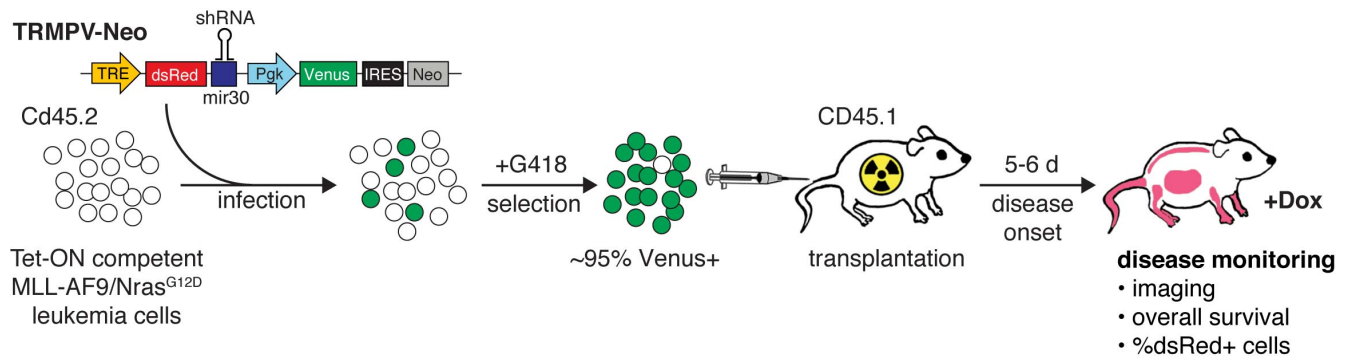

**Supplementary Figure 10. Schematic of conditional RNAi experiments.** Tet-ON competent leukemia cells were transduced with TRMPV-Neo-shRNAs, followed by G418 selection, and subsequently transplanted into sublethally irradiated recipient mice. Upon disease onset (determined using bioluminescent imaging, typically after 5-6 days), shRNA expression was induced by dox supplementation in drinking water and chow. Mice were then evaluated using bioluminescent imaging, overall survival, and contribution of dsRed+ (shRNA expressing) leukemia cells to the final disease burden (for details see also<sup>2</sup>).



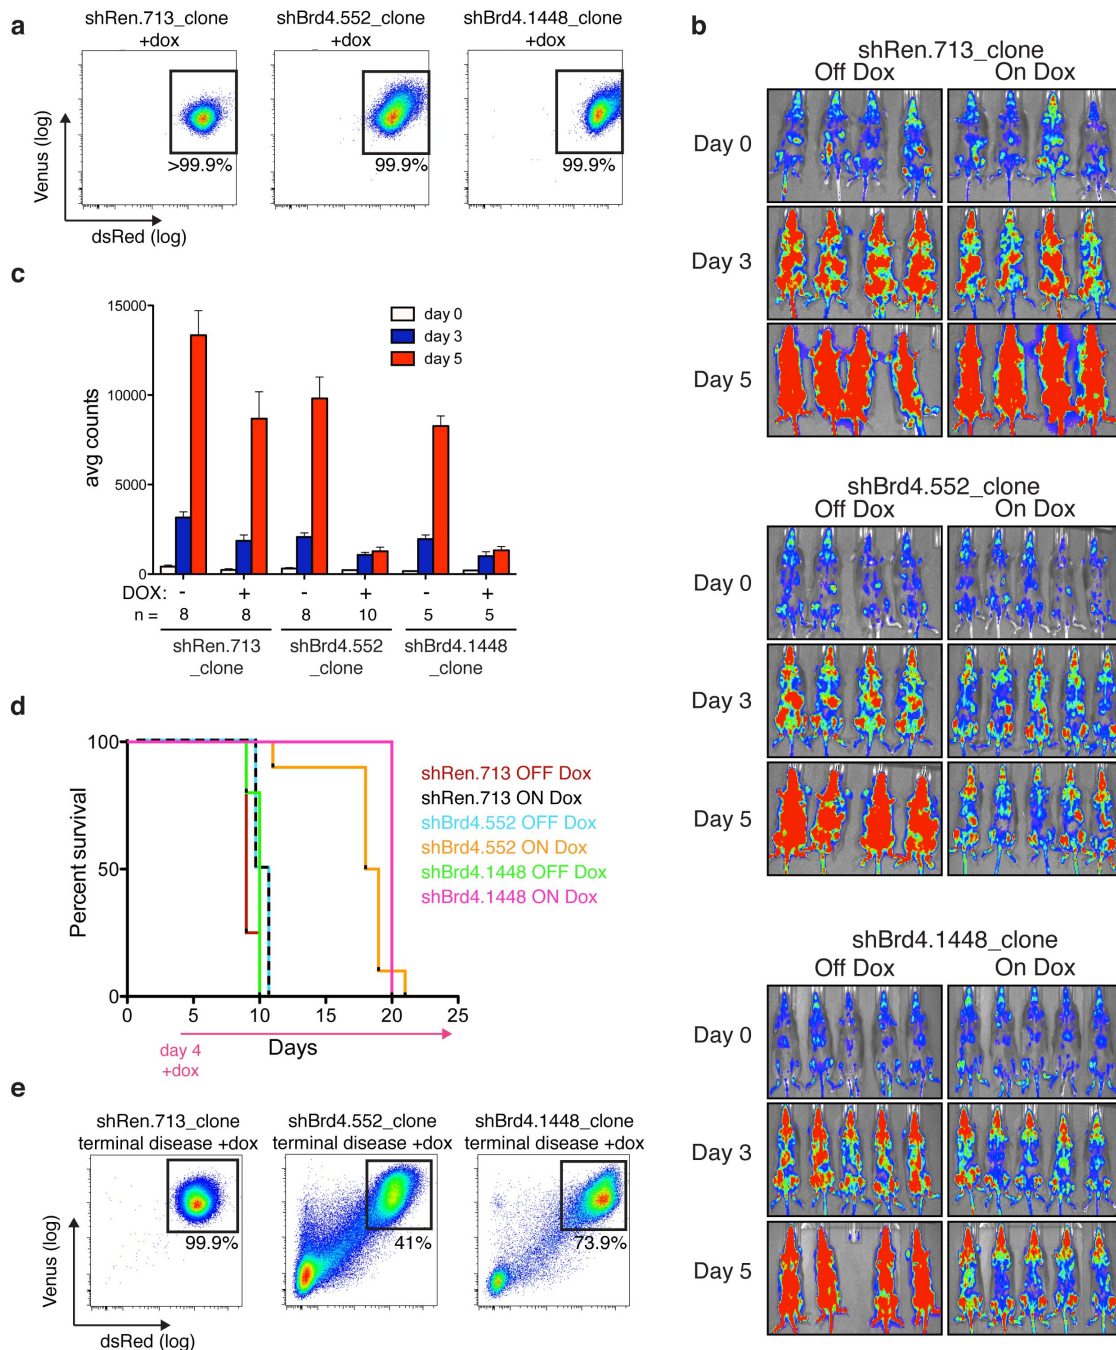

**Supplementary Figure 11. Clonal TRMPV-Neo leukemia lines display robust disease inhibition upon dox induction of shRNA expression.** TRMPV-Neo clones were generated by performing limiting serial dilutions. **a**) FACS evaluation of shRNA expression after 2 days of dox induction. While TRMPV-Neo pools typically are ~85% Venus+/dsRed+ (Fig. 2), identified clones are >99.9% positive. Representative plots are shown. **b**) Bioluminescent imaging of leukemia burden. Dox was administered following disease onset (day 5-6 post transplant). **c**) Quantitation of bioluminescent imaging responses following dox treatment. Number of mice in each treatment arm is indicated; error bars represent s.e.m. **d**) Kaplan-Meier survival curves of recipient mice transplanted with the indicated TRMPV-shRNA leukemia clones. Interval of dox treatment is indicated by arrow. Overall survival benefit of clonal shBrd4 disease is 9-10 days, whereas with non-clonal pools median survival is 4 days. **e**) Representative flow cytometry plots of donor-derived (CD45.2+) bone marrow cells in terminally diseased dox-treated mice. An outgrowth of shRNA-negative cells emerges in all moribund mice on dox, suggesting that leukemia cells evade Brd4-shRNA expression despite the use of clonal lines.

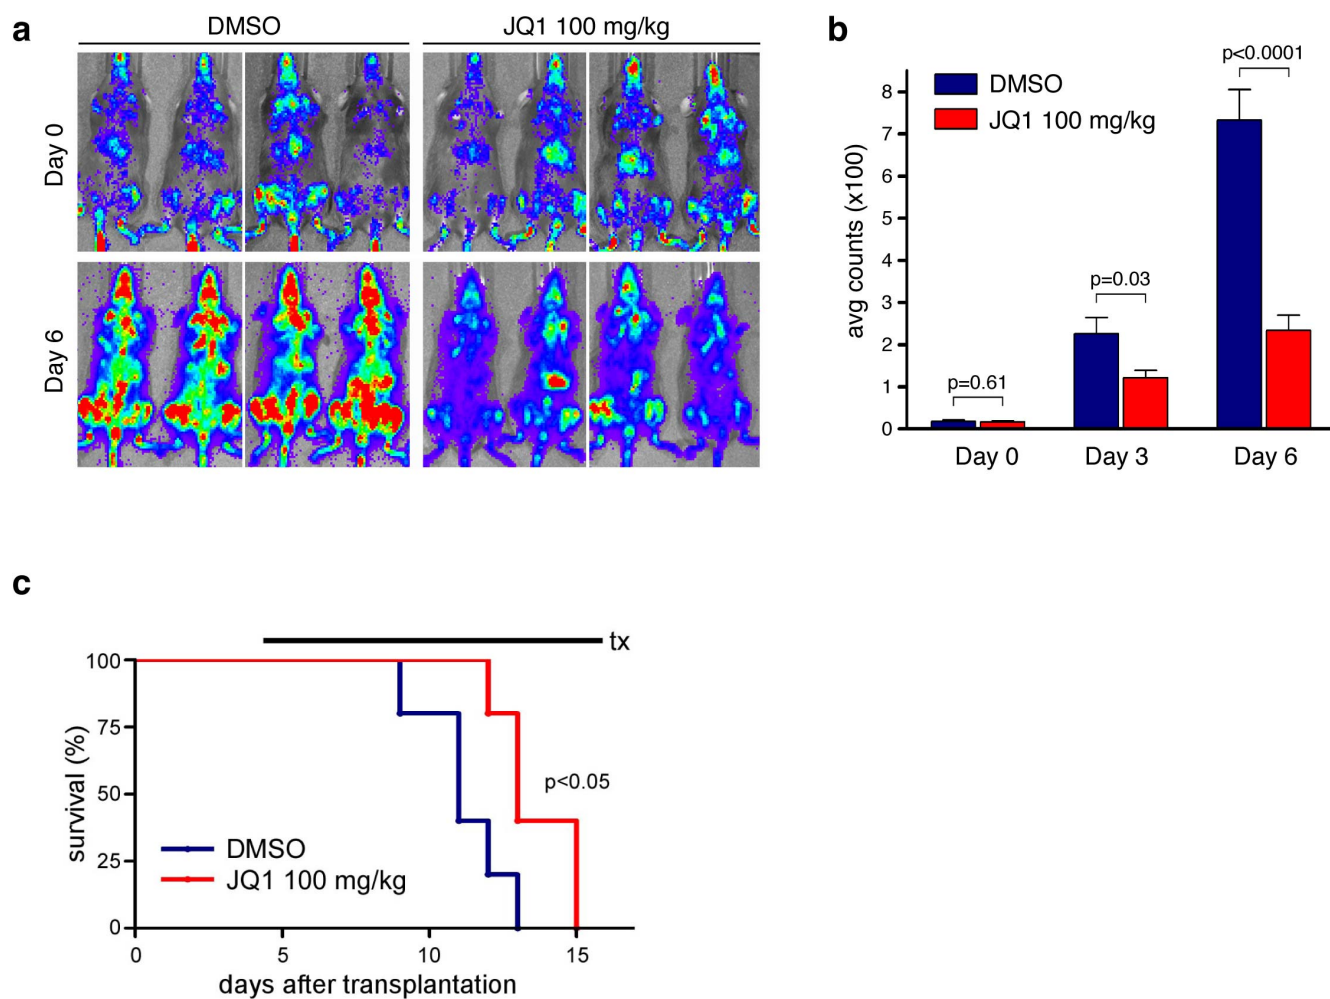

**Supplementary Figure 12. 100 mg/kg/d JQ1 treatment displays single agent activity in established MLL-AF9/Nras<sup>G12D</sup> leukemia. a)** Bioluminescent imaging of leukemic mice treated with 100 mg/kg/d JQ1. Mice were transplanted with 1 million leukemia cells, followed by treatment initiation on day 4 (when disease becomes visible by imaging). **b)** Quantitation of bioluminescent imaging. (n=8 in each group). Error bars represent s.e.m. **c)** Kaplan-Meier survival curves of control and JQ1-treated mice. Treatment was initiated on day 4 post transplant (indicated by horizontal line). Statistical significance was calculated using a Log-rank test.

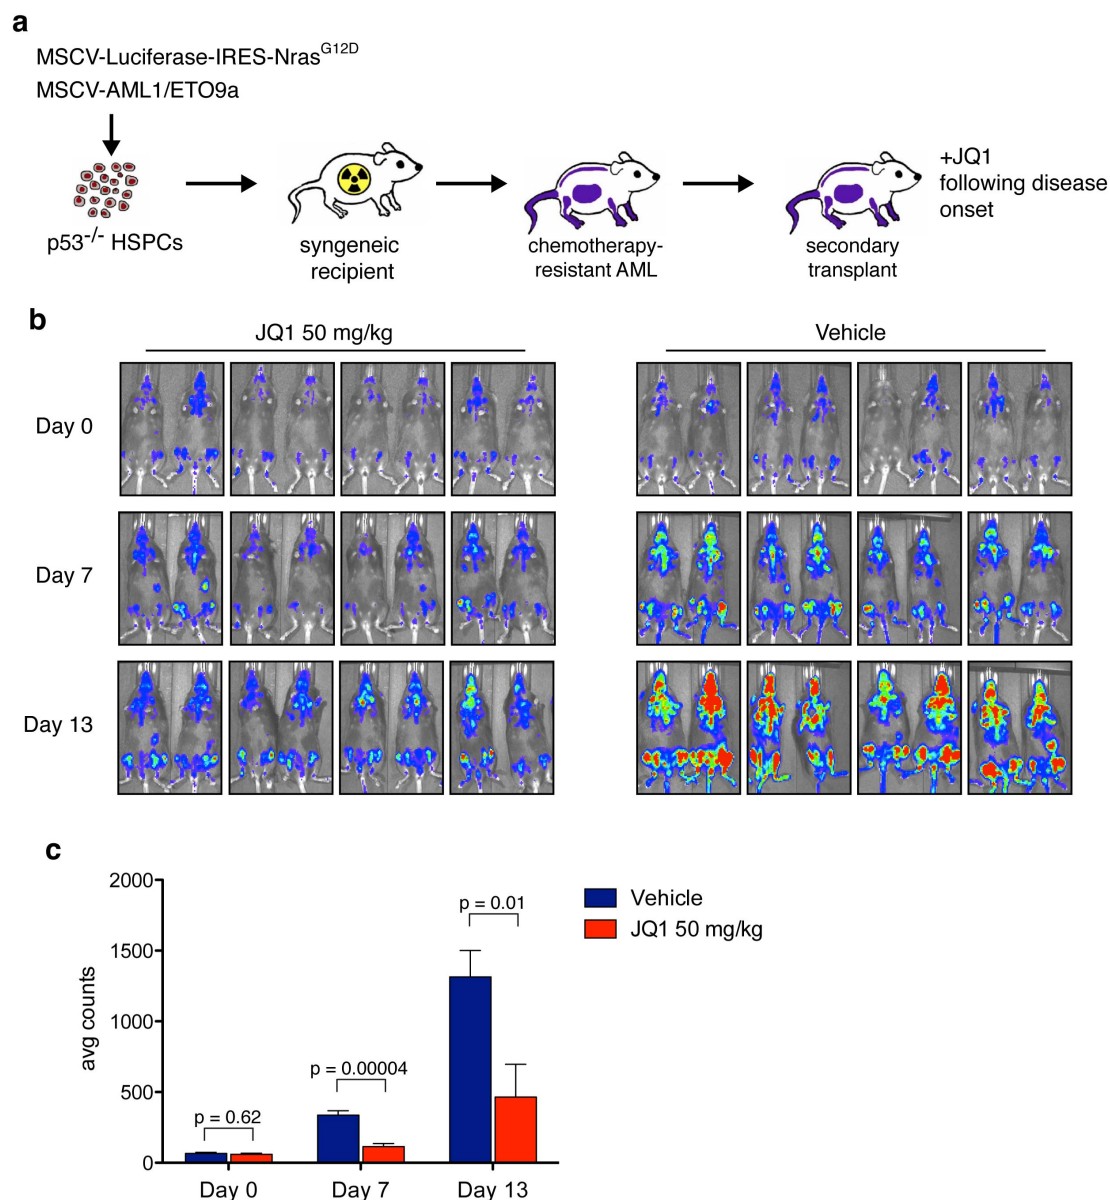

**Supplementary Figure 13. JQ1 has single-agent activity in the AML1-ETO9a/Nras<sup>G12D</sup>/p53<sup>-/-</sup> AML mouse model.** **a)** Experimental strategy. p53<sup>-/-</sup> HSPCs were cotransduced with AML1-ETO9a and Luciferase-IRES-Nras<sup>G12D</sup> constructs, followed by transplantation of cells into a sublethally irradiated recipient mouse. With a high-penetrance, mice succumb to AML as has been described previously<sup>4</sup>. Splenic leukemia material derived from moribund mice was transplanted into secondary recipient animals. 50 mg/kg/d JQ1 treatment was initiated following 5 days of disease onset, confirmed by bioluminescent imaging. **b)** Bioluminescent imaging of leukemic mice at indicated timepoints. **c)** Quantitation of bioluminescent imaging responses to JQ1 treatment. Shown are mean values of 8 mice in each treatment group, error bars represent s.e.m, p-values were calculated using a two-tailed Student's paired t-test.

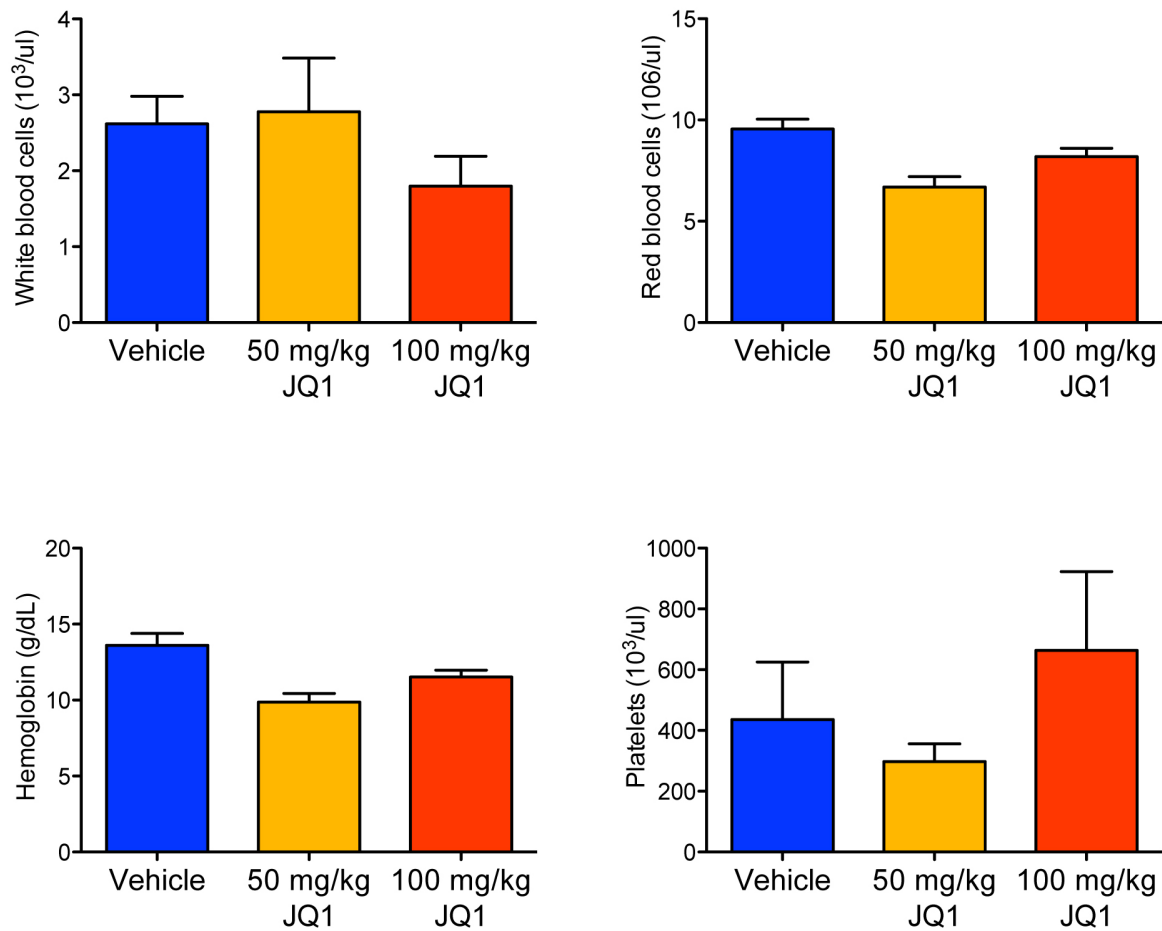

**Supplementary Figure 14. Evaluation of effects of JQ1 treatment on peripheral hematopoietic cell counts.** Healthy C57Bl/6 mice were treated with either JQ1 (50 or 100 mg/kg/d) or DMSO-carrier (400  $\mu$ l/d), both administered by intraperitoneal injection for twenty days. Peripheral blood was collected by submandibular bleeding and analyzed using a Hemavet 950 analyzer (Drew Scientific). Values represent average values of 3 replicate mice; error bars indicate s.e.m.

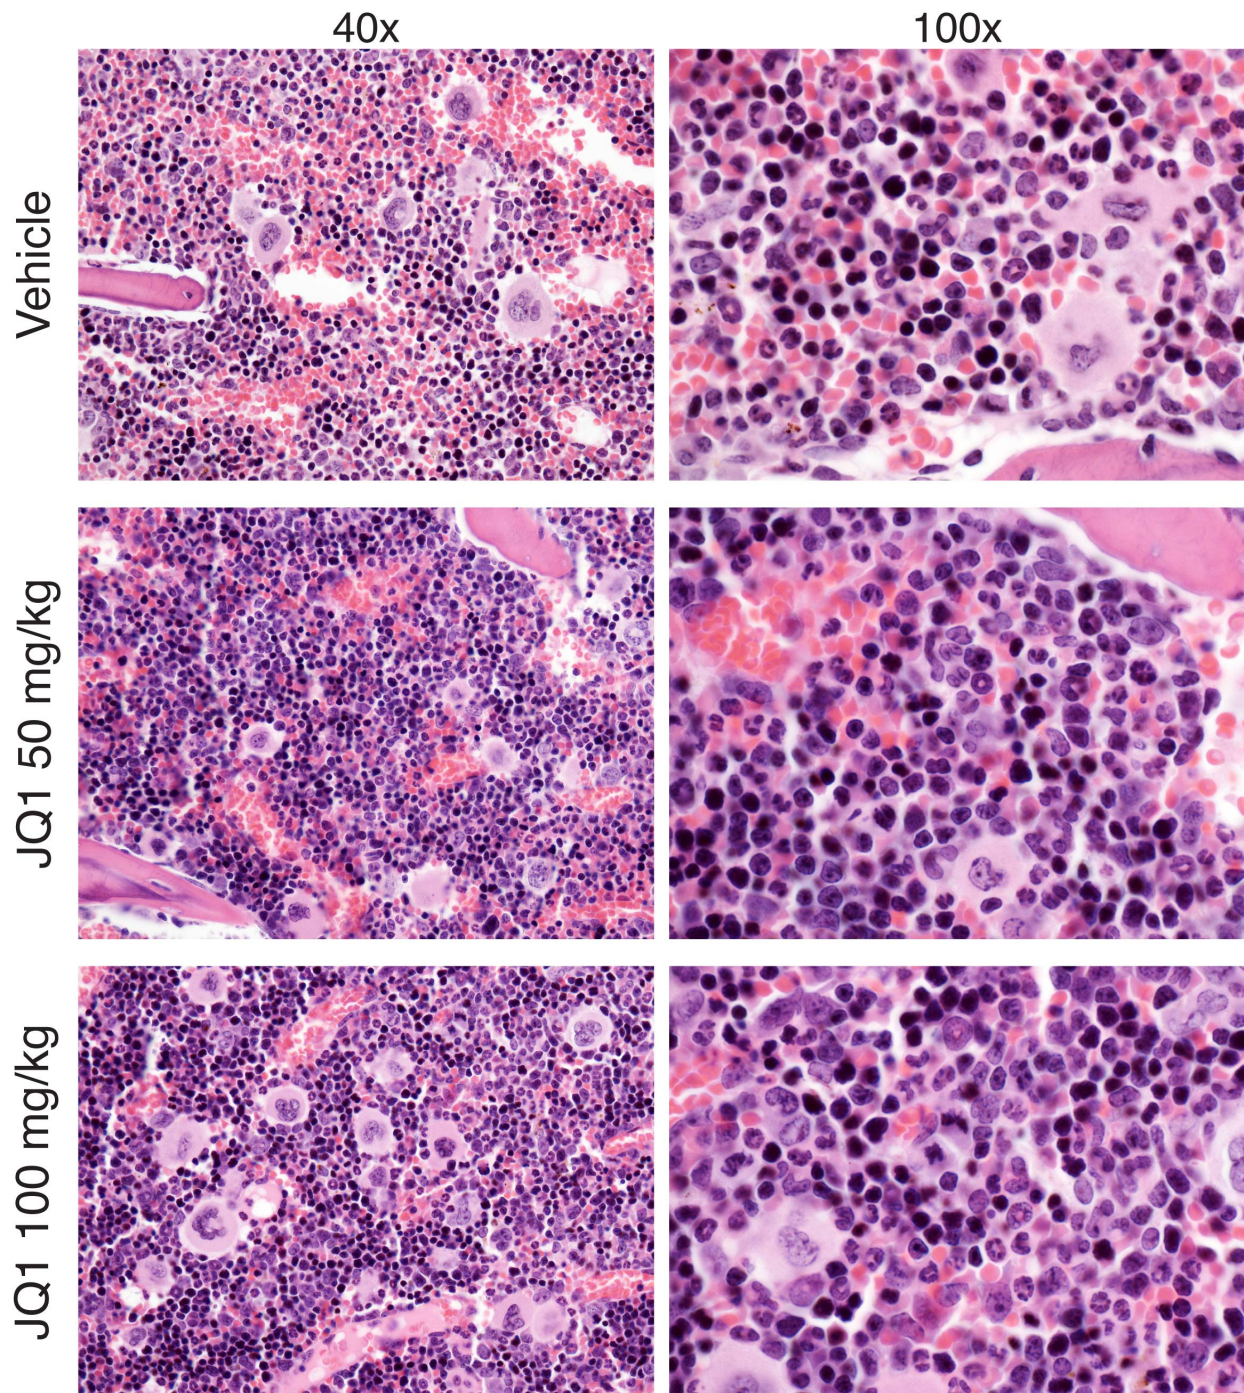

**Supplementary Figure 15. JQ1 administration for twenty days has a minimal impact on normal hematopoiesis.** Healthy C57BL/6 mice were treated with daily intraperitoneal injections of 50 mg/kg or 100 mg/kg JQ1 for 20 days prior to bone marrow analysis. H&E stained histopathology of sternal bone marrow from mice treated with vehicle or with JQ1 showed a normal cellularity and normal mixed hematopoiesis. n=3-5 mice for each treatment group. Representative images are shown.

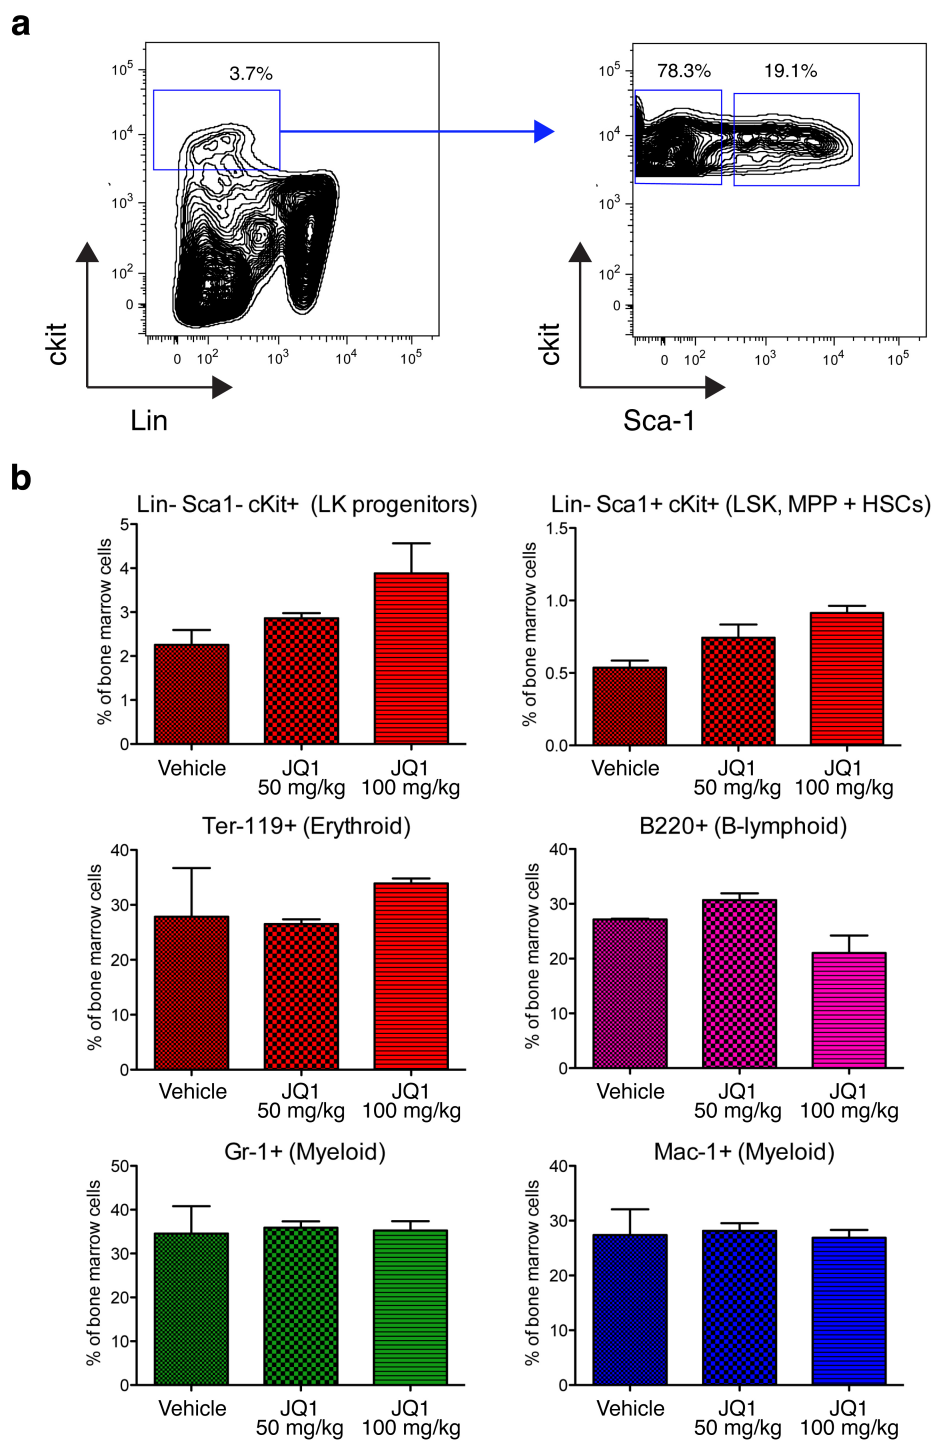

**Supplementary Figure 16. Daily JQ1 administration has a minimal impact on normal hematopoiesis.** Healthy C57BL/6 mice were treated with daily injections of 50 mg/kg or 100 mg/kg JQ1 for 20 days prior to bone marrow FACS analysis. **a**) Representative FACS plots of bone marrow cells demonstrating gating used to discriminate and quantify percentages Lin<sup>-</sup>, ckit<sup>+</sup> cells (LK progenitors) and Lin<sup>-</sup>Sca1<sup>+</sup>ckit<sup>+</sup> (LSK MPP+HSC). **b**) Percentage of total bone marrow cells staining for the indicated antibodies. (n=3). Error bars indicate s.e.m.

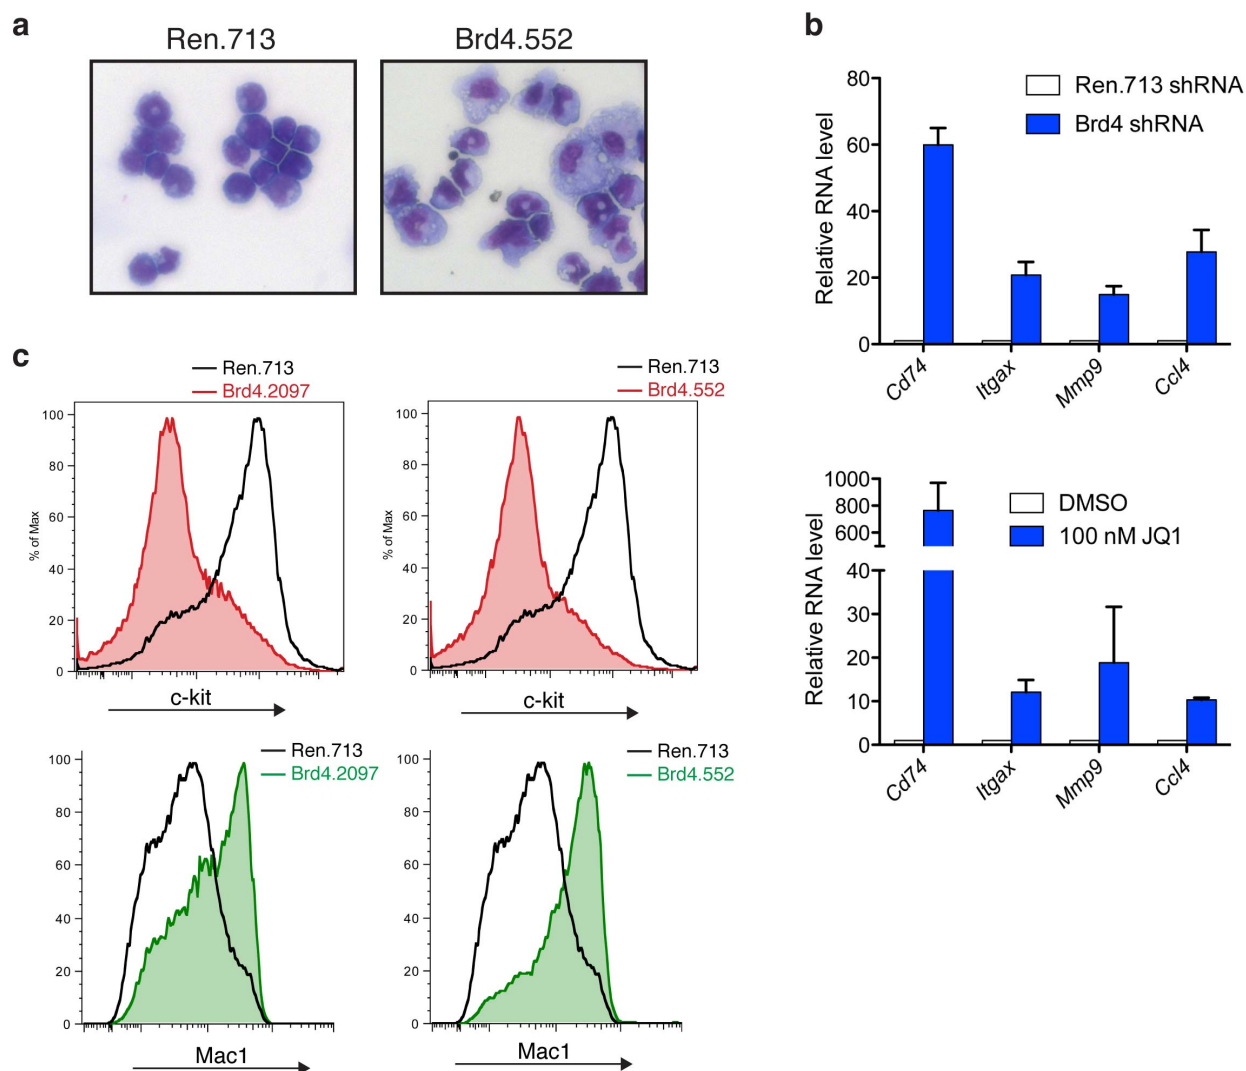

**Supplementary Figure 17. Brd4 knockdown leads to myeloid differentiation.** **a)** Light microscopy of May-Grunwald/Giemsa-stained MLL-AF9/Nras<sup>G12D</sup> leukemia cells following 2 days of dox-induced TRMPV-shRNA expression. **b)** RT-qPCR analysis of genes involved in macrophage functions following 2 days of dox-induced TRMPV-shRNA expression or 2 days of 100 nM JQ1 treatment. For shRNA experiments, dsRed+/shRNA+ cells were FACS-sorted to prepare RNA. Brd4 shRNA data shown are an average of Brd4.552, 1448, and 2097 shRNA samples. Signals were normalized to Gapdh, with control samples set to 1. (n = 3). Error bars indicate s.e.m. Genes were identified from expression microarray / GSEA analysis performed in Fig 3e and f. **c)** FACS analysis of c-kit and Mac-1 surface expression after 4 days of dox-induced shRNA expression. shRNA expression was induced from TtTMPV-transduced leukemia cells. Events are gated on TurboRFP+ (shRNA+) cells.

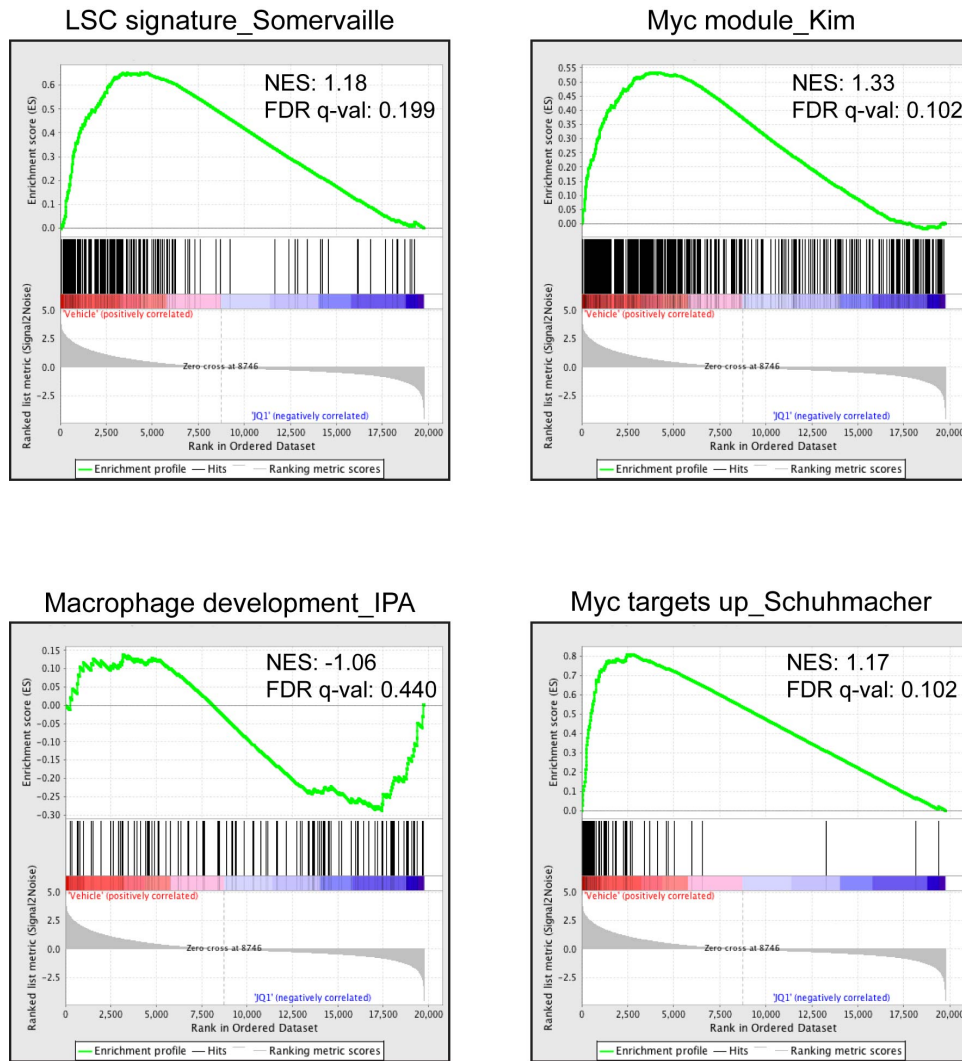

**Supplementary Figure 18. JQ1 triggers a similar pattern of gene expression changes in THP-1 human AML cells as seen in murine MLL-AF9/Nras<sup>G12D</sup> AML model.** THP-1 cells were treated with 250 nM JQ1 for 48 hours prior to RNA collection. Expression arrays were performed using Affymetrix human gene ST 1.0 arrays. GSEA plots evaluating changes in macrophage, LSC, and Myc gene signatures upon Brd4 inhibition. Note: Macrophage development\_IPA fails to meet significant FDR q-value of 0.25. Human gene sets are included in Supplementary Table 2.



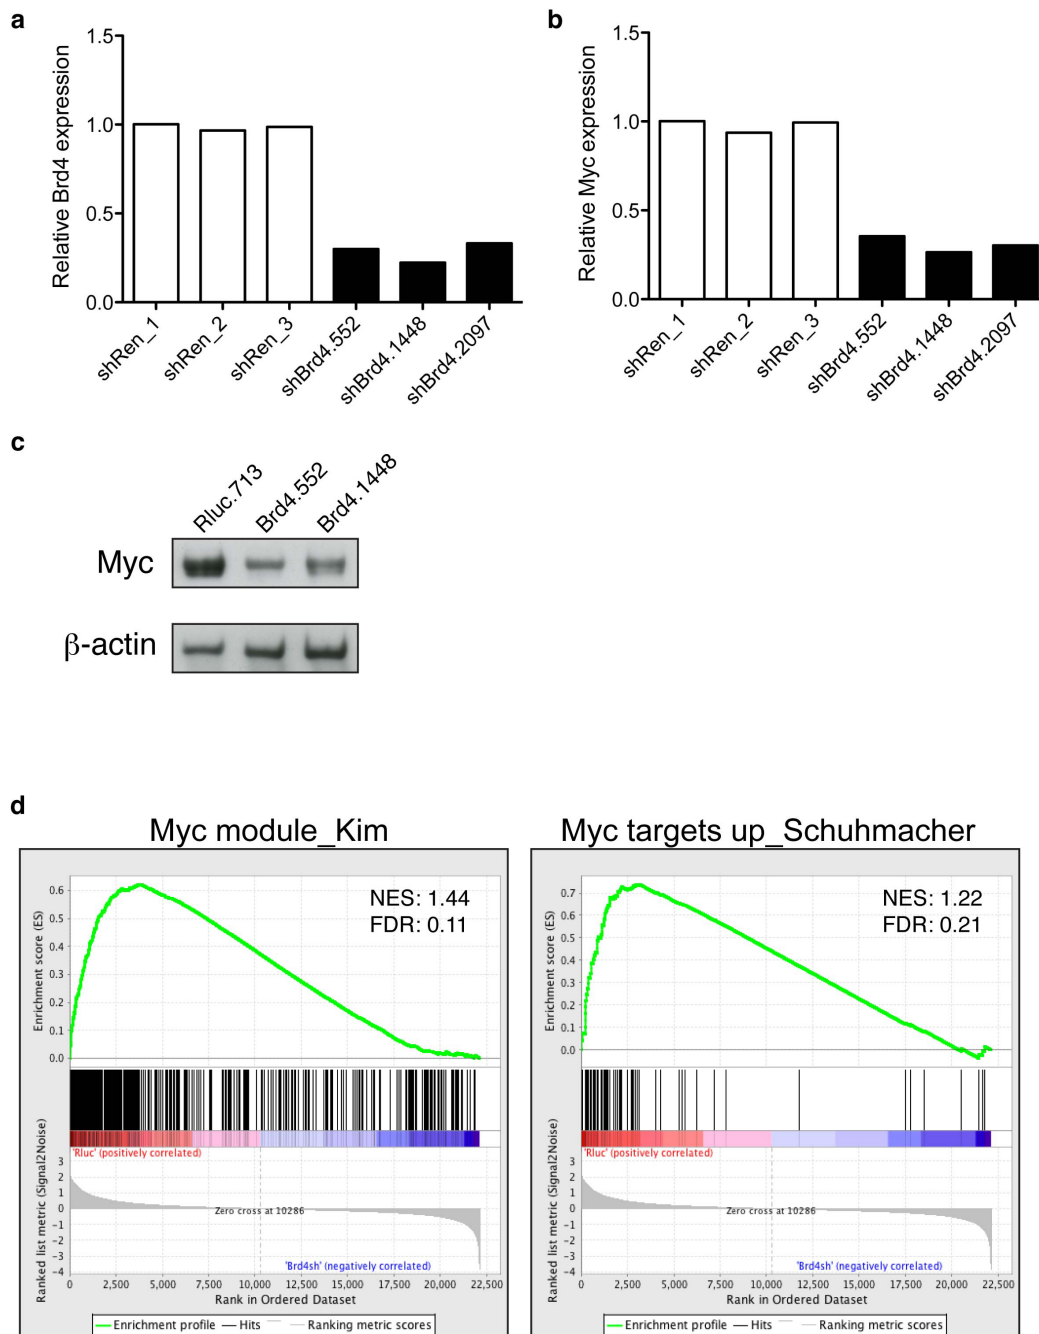

**Supplementary Figure 19. Brd4 knockdown via shRNA leads to downregulation of Myc levels and downregulation of Myc target gene expression. a and b)** RT-qPCR analysis of Brd4 (a) and Myc (b) mRNA levels prepared from sorted TurboRFP<sup>+</sup> (shRNA expressing) leukemia cells transduced with indicated TtTMPV-shRNA constructs. Cells were treated with dox for 3 days. Results were normalized to Gapdh. **c)** Western blotting performed using extracts prepared from Brd4-shRNA expressing cells. TRMPV-transduced MLL-AF9/Nras leukemia clones were used. Cells were treated with dox for 3 days. **d)** Gene set enrichment analysis evaluating changes in Myc downstream target gene expression. Microarray data was obtained from RNA samples described in a). Myc target gene sets have been described previously<sup>5,6</sup>.

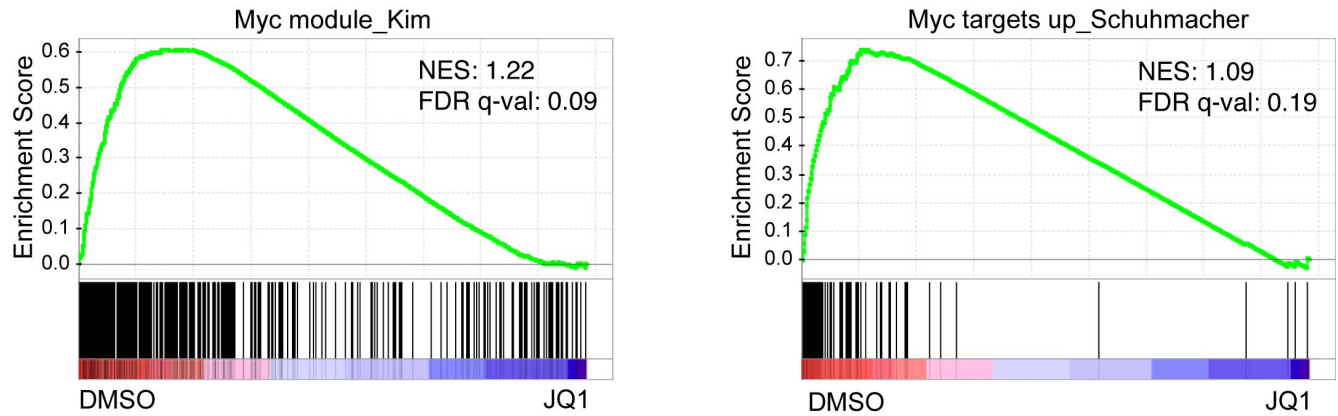

**Supplementary Figure 20. JQ1 triggers downregulation of Myc target gene expression.** GSEA plots evaluating JQ1-induced alteration in gene signatures downstream of Myc<sup>5,6</sup>. Microarray data was obtained from MLL-AF9/Nras<sup>G12D</sup> leukemia cells treated for 48 hours with DMSO or 100 nM JQ1.

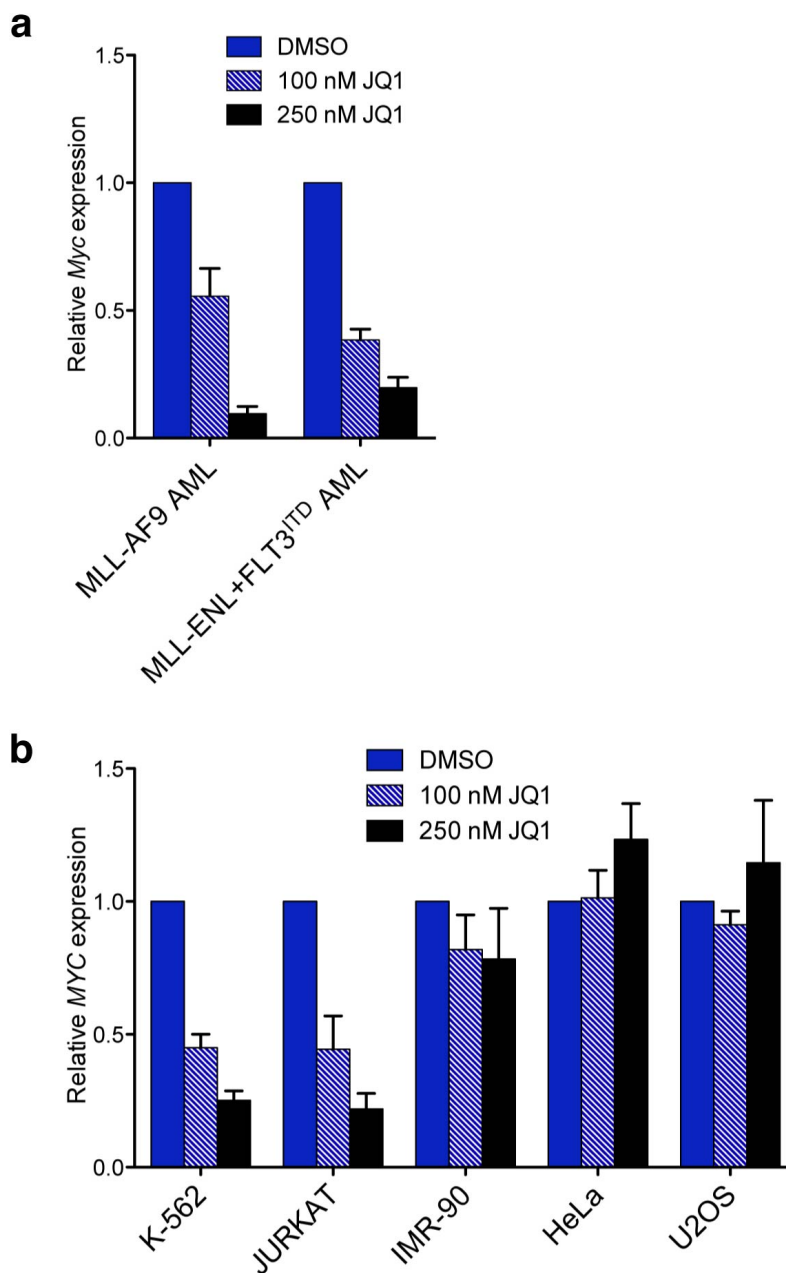

**Supplementary Figure 21. 48 hours of JQ1 treatment suppresses Myc expression selectively in leukemia cells.** RT-qPCR analysis of Myc RNA levels in mouse (a) or human (b) cell lines. Results are normalized to Gapdh, with RNA levels in untreated cells set at 1 ( $n = 3$ ). Note: JQ1 triggers downregulation of MYC transcript levels even in K-562 and JURKAT cells, which are insensitive to submicromolar JQ1 doses. This suggests that (i) JQ1 can suppress MYC even in non-AML leukemias and (ii) K-562 and JURKAT appear to less sensitive to MYC suppression than AML cell lines describe elsewhere in the manuscript.  $n = 3$ . Error bars indicate s.e.m.

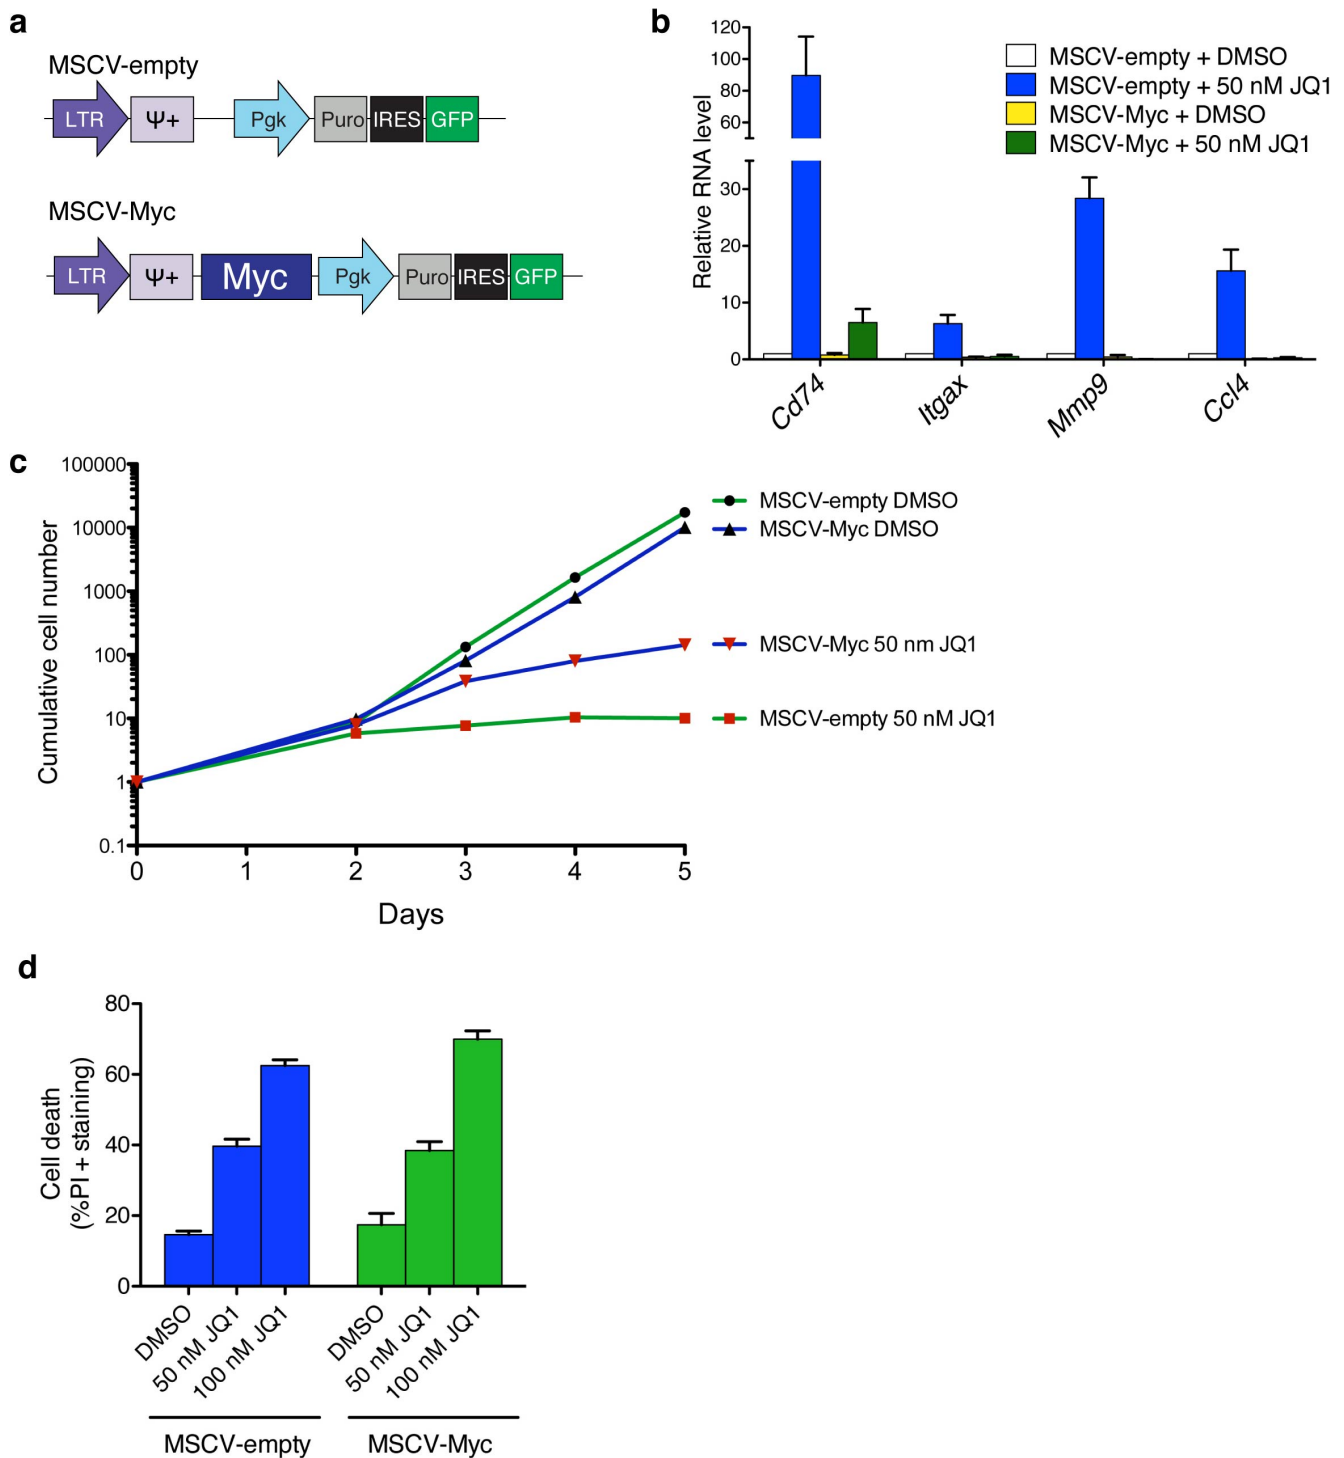

**Supplementary Figure 22. Impact of retroviral Myc overexpression on sensitivity of leukemia cells to JQ1.** **a**) Retroviral vectors used for Myc overexpression. **b**) RT-qPCR evaluation of macrophage-related genes upon 5 day JQ1 treatment of leukemia cells overexpressing Myc or empty vector control.  $n=3$ . Error bars represent s.e.m. **c**) Cumulative cell number in control and Myc-transduced MLL-AF9/Nras<sup>G12D</sup> leukemia cells in the presence of 50 nM JQ1 or DMSO carrier control. **d**) Cell death quantitation of JQ1-treated cells on day 4. PI+ cells were quantified by FACS ( $n=3$ ). Error bars represent s.e.m.

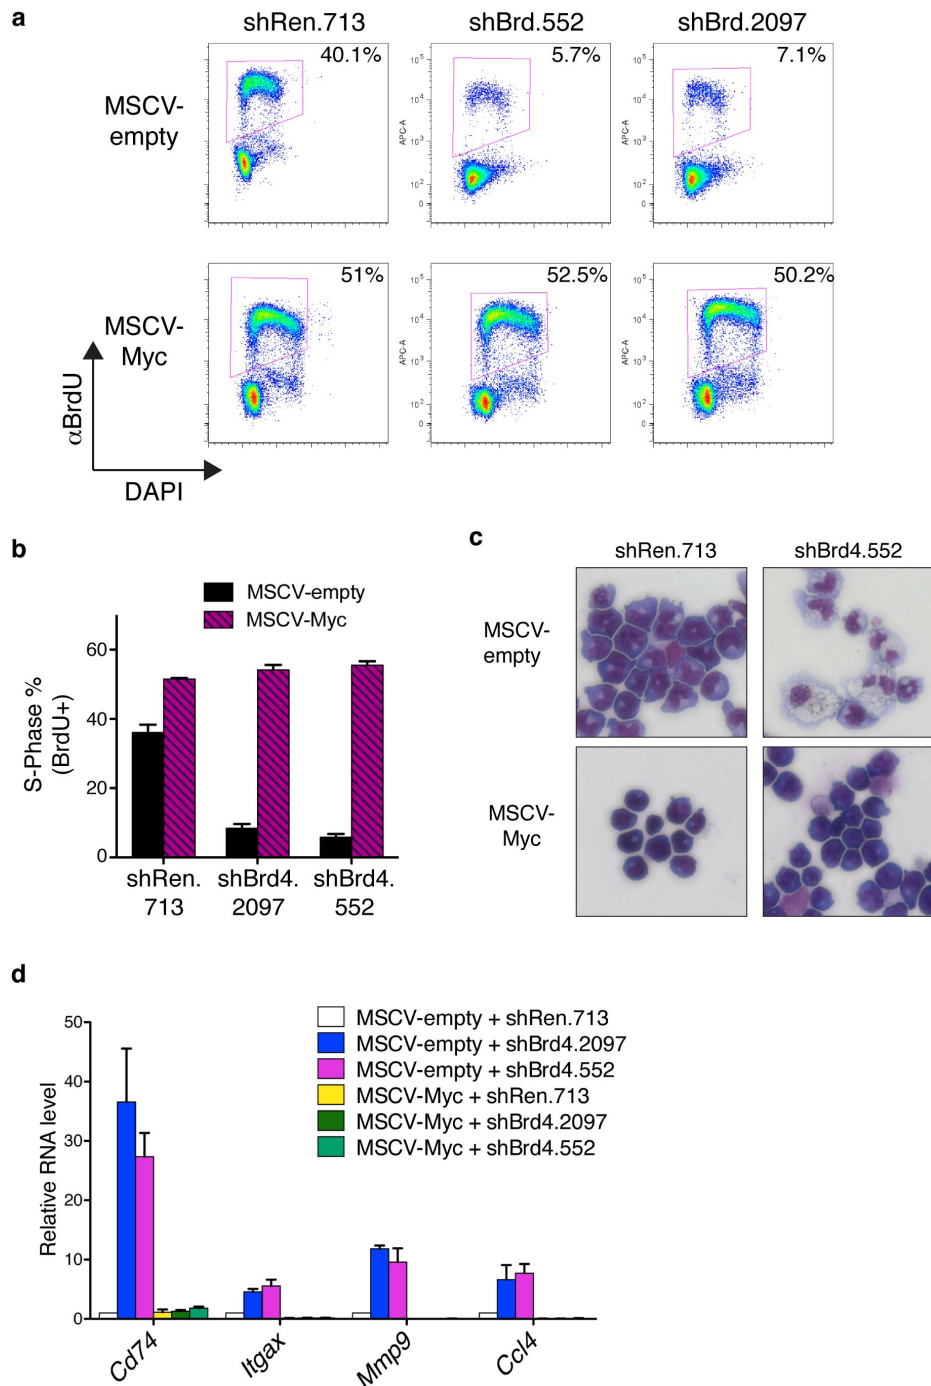

**Supplementary Figure 23. Myc overexpression prevents Brd4 shRNA-induced cell-cycle arrest and macrophage differentiation.**

**a)** Representative flow cytometry plots showing cell cycle analysis (BrdU/DAPI double staining) of MLL-AF9/Nras<sup>G12D</sup> leukemia cultures cotransduced with MSCV-Myc or empty vector together with TtTMPV-shRNAs, and subsequently selected with puromycin and G418. Cells were treated with dox for 3 days to induce shRNA expression. Events are gated on dsRed+/shRNA+ cells. **b)** Quantitation of BrdU incorporation in shRNA+/dsRed+ population. n=3. Error bars represent s.e.m. **c)** Light microscopy of May-Grunwald/Giemsa stained MLL-AF9/Nras<sup>G12D</sup> leukemia cells. Dox treatment was administered for 2 days. 40X objective. **d)** RT-qPCR evaluation of macrophage-related genes after 2.5 days of dox-induced Brd4-shRNA expression in Tet-ON competent leukemia cells transduced with MSCV-Myc or empty MSCV vector. shRNAs were expressed using the TtTMPV vector. n=3. Error bars represent s.e.m.

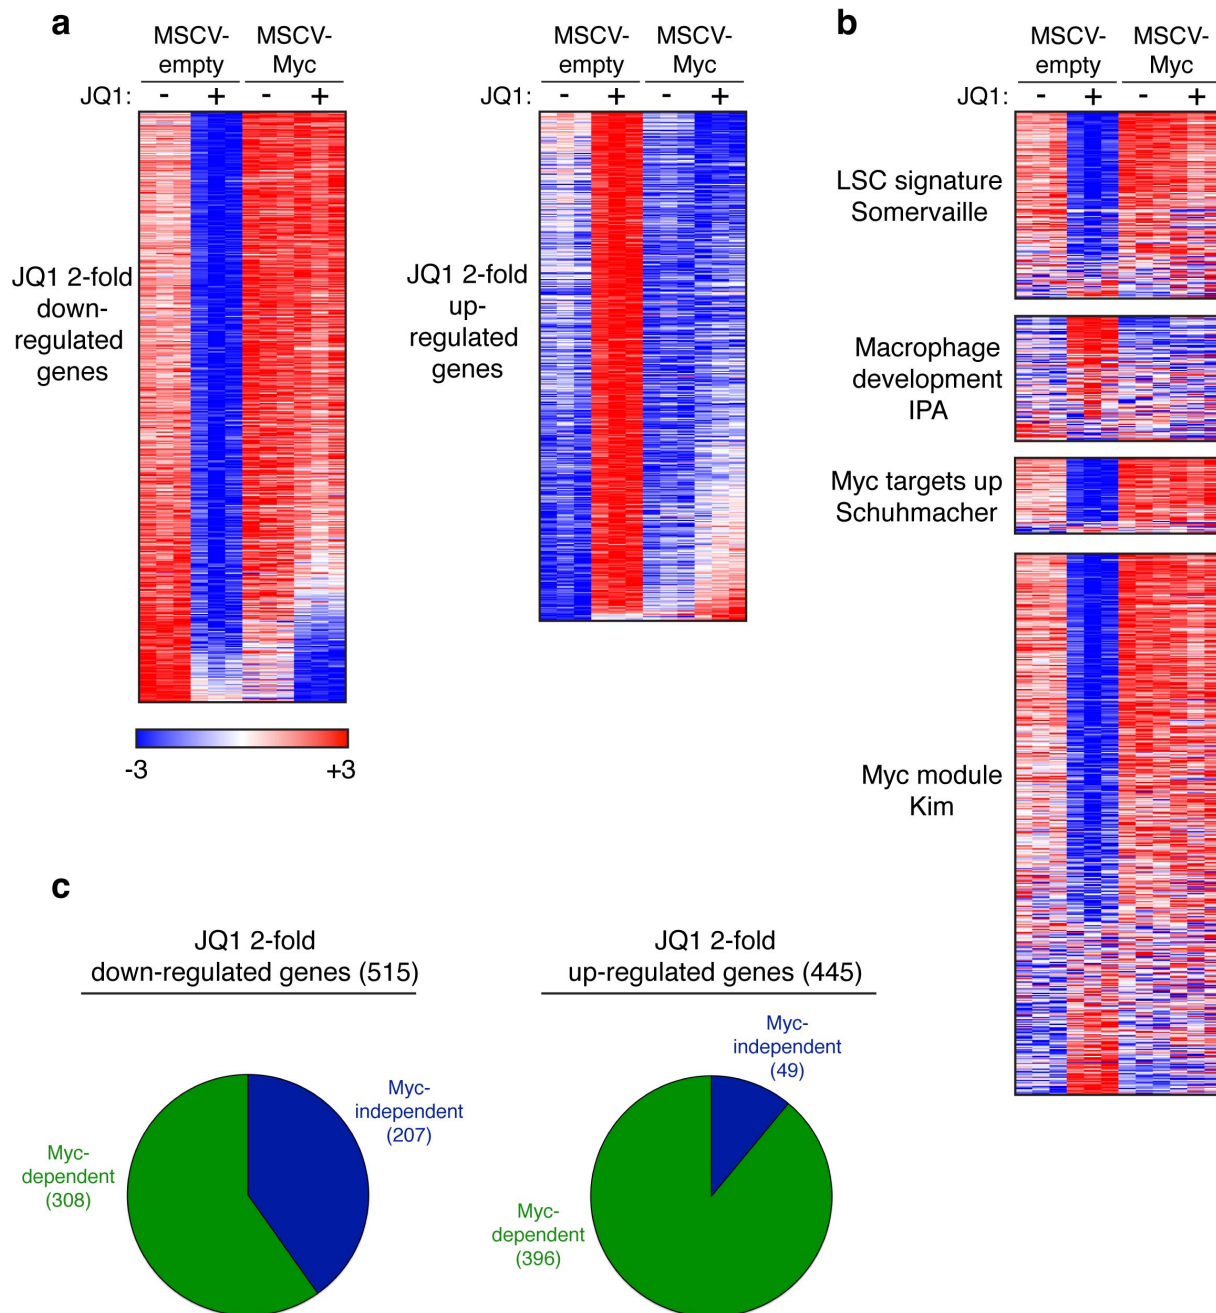

**Supplementary Figure 24. The majority of JQ1-induced gene expression changes are secondary effects of Myc inhibition.** MLL-AF9/Nras<sup>G12D</sup> leukemia cells transduced with MSCV-Myc or empty vector control were treated with 100 nM JQ1 for 48 hours, followed by collection of RNA for expression microarray analysis. **a)** Row-normalized heatmap of relative expression levels of genes found to be 2-fold downregulated (left) or upregulated (right) following JQ1 treatment in empty vector control leukemia cells. Note: The modest level of Myc overexpression utilized here influences gene expression prior to JQ1-treatment. **b)** Influence of Myc overexpression on gene expression changes of indicated gene sets. Color scale in a) and b) indicates row-normalized expression values. **c)** Categorization of JQ1-induced gene expression changes based on the relationship to Myc expression. Genes that change 2-fold in expression following JQ1 treatment of control cells, were classified as Myc-independent if they are still able to change 2-fold in expression in leukemia cells

transduced with MSCV-Myc. Genes were classified as Myc-dependent if they failed to change 2-fold in expression in JQ1-treated MSCV-Myc cells.

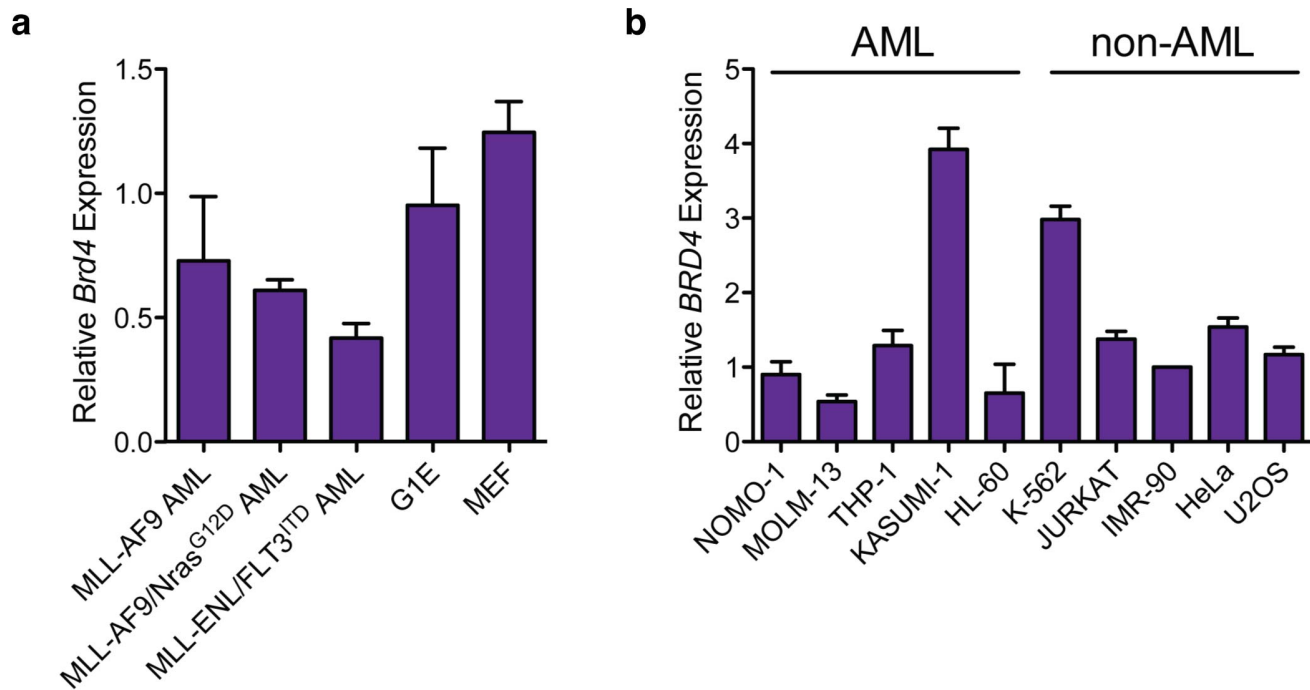

**Supplementary Figure 25. Brd4 is not consistently overexpressed in AML relative to other cell types.** RT-qPCR of indicated mouse (a) or human (b) cell lines. Results are normalized to Gapdh. n = 3. Error bars represent s.e.m.



a

| Individual and mean plasma concentration-time data of (S)-JQ1 after an IP dose of 50 mg/kg in male CD1 mice |            |                    |                       |       |       |              |      |       |
|-------------------------------------------------------------------------------------------------------------|------------|--------------------|-----------------------|-------|-------|--------------|------|-------|
| Dose (mg/kg)                                                                                                | Dose route | Sampling time (hr) | Concentration (ng/mL) |       |       | Mean (ng/mL) | SD   | CV(%) |
|                                                                                                             |            |                    | Individual            |       |       |              |      |       |
| 50                                                                                                          | IP         | 0                  | BQL                   | BQL   | BQL   | BQL          | NA   | NA    |
|                                                                                                             |            | 0.033              | 7270                  | 9480  | 5470  | 7407         | 2008 | 27.1  |
|                                                                                                             |            | 0.083              | 11000                 | 12600 | 9510  | 11037        | 1545 | 14.0  |
|                                                                                                             |            | 0.25               | 8660                  | 8930  | 11400 | 9663         | 1510 | 15.6  |
|                                                                                                             |            | 0.5                | 8540                  | 6950  | 9920  | 8470         | 1486 | 17.5  |
|                                                                                                             |            | 1                  | 5690                  | 4270  | 4680  | 4880         | 731  | 15.0  |
|                                                                                                             |            | 2                  | 3590                  | 4370  | 4450  | 4137         | 475  | 11.5  |
|                                                                                                             |            | 4                  | 2620                  | 1280  | 2060  | 1987         | 673  | 33.9  |
|                                                                                                             |            | 6                  | 65.7                  | 523   | 801   | 463          | 371  | 80.1  |
|                                                                                                             |            | 8                  | 151                   | 595   | 446   | 397          | 226  | 56.9  |
|                                                                                                             |            | 12                 | 4.54                  | 5.02  | 10.9  | 6.82         | 3.54 | 51.9  |
|                                                                                                             |            | 24                 | BQL                   | BQL   | BQL   | BQL          | NA   | NA    |
| PK parameters                                                                                               |            | Unit               | Estimate              |       |       |              |      |       |
| $T_{max}$                                                                                                   | hr         | 0.0830             |                       |       |       |              |      |       |
| $C_{max}$                                                                                                   | ng/mL      | 11000              |                       |       |       |              |      |       |
| Terminal $t_{1/2}$                                                                                          | hr         | 1.24               |                       |       |       |              |      |       |
| $AUC_{last}$                                                                                                | hr*ng/mL   | 22700              |                       |       |       |              |      |       |
| $AUC_{INF}$                                                                                                 | hr*ng/mL   | 22700              |                       |       |       |              |      |       |

b

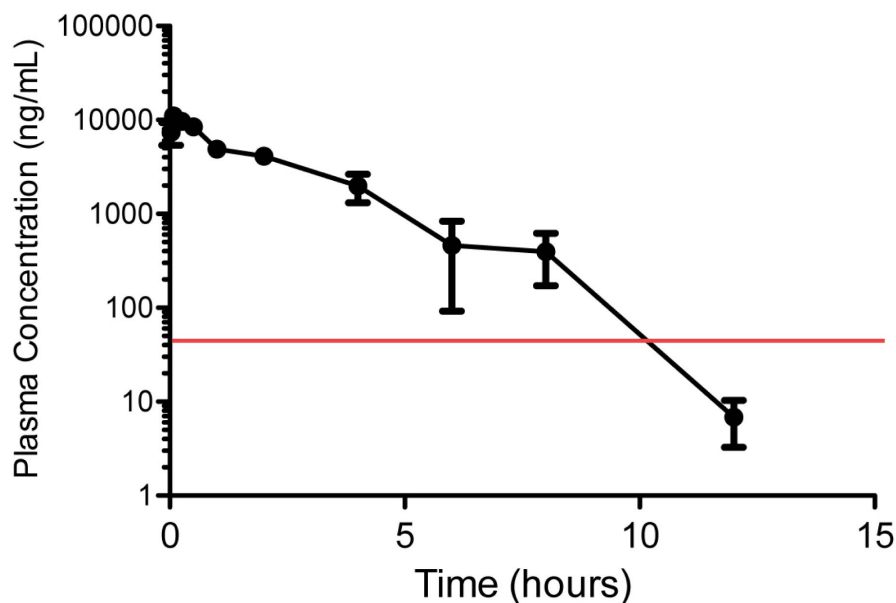

**Supplementary Figure 26. Pharmacokinetic study of (+)-JQ1 in mice. a)** Table of pharmacokinetic data and measured parameters. Plasma drug concentrations were measured by triple quadrupole LCMS-MS (API-2000) following a single intraperitoneal injection of (+)-JQ1 (50 mg/kg) into adult C1 male mice, at prespecified time points, as presented. Administration of (+)-JQ1 at this dose yields an excellent peak plasma concentration ( $C_{max} > 20 \mu\text{M}$ ) and total drug exposure ( $AUC > 20,000 \text{ h} \cdot \text{ng/mL}$ ). BQL indicates samples where (+)-JQ1 was beyond the quantifiable limit of the pharmacokinetic detection assay (1.00 ng/mL). **b)** Plasma concentration-time profile for (+)-JQ1 using data listed in (a). Data represent mean measurements and error bars indicate the standard deviation, both from triplicate independent measurements. Plasma concentrations of drug above the biologically active concentration observed in vitro (100 nM; horizontal red line), are observed for more than 10 hours by extrapolation.

## Supplementary References

1. Huesken, D. et al. Design of a genome-wide siRNA library using an artificial neural network. *Nature Biotechnology* 23, 995-1001 (2005).
2. Zuber, J. et al. Toolkit for evaluating genes required for proliferation and survival using tetracycline-regulated RNAi. *Nat Biotechnol* 29, 79-83 (2011).
3. Drexler, H.G. Guide to Leukemia-Lymphoma Cell Lines. 2nd edition edn (ebook on CD, 2010).
4. Zuber, J. et al. Mouse models of human AML accurately predict chemotherapy response. *Genes Dev* 23, 877-89 (2009).
5. Kim, J. et al. A Myc network accounts for similarities between embryonic stem and cancer cell transcription programs. *Cell* 143, 313-24 (2010).
6. Schuhmacher, M. et al. The transcriptional program of a human B cell line in response to Myc. *Nucleic Acids Res* 29, 397-406 (2001).

Type of file: table

Label: Supp Table

Filename: nature10334-s2.xls

| shRNA ID           | GeneSymbol    | EntrezID  | Pool | shRNA start |
|--------------------|---------------|-----------|------|-------------|
| 100043305.158      | 100043305     | 100043305 | LIB  | 158         |
| 100043305.369      | 100043305     | 100043305 | LIB  | 369         |
| 100043305.412      | 100043305     | 100043305 | LIB  | 412         |
| 100043305.458      | 100043305     | 100043305 | LIB  | 458         |
| 2900092E17Rik.377  | 2900092E17Rik | 67278     | LIB  | 377         |
| 2900092E17Rik.546  | 2900092E17Rik | 67278     | LIB  | 546         |
| 2900092E17Rik.1051 | 2900092E17Rik | 67278     | LIB  | 1051        |
| 2900092E17Rik.1361 | 2900092E17Rik | 67278     | LIB  | 1361        |
| Actl6b.379         | Actl6b        | 83766     | LIB  | 379         |
| Actl6b.819         | Actl6b        | 83766     | LIB  | 819         |
| Actl6b.917         | Actl6b        | 83766     | LIB  | 917         |
| Actl6b.989         | Actl6b        | 83766     | LIB  | 989         |
| Actl6b.1221        | Actl6b        | 83766     | LIB  | 1221        |
| Alkbh2.462         | Alkbh2        | 231642    | LIB  | 462         |
| Alkbh2.557         | Alkbh2        | 231642    | LIB  | 557         |
| Alkbh2.590         | Alkbh2        | 231642    | LIB  | 590         |
| Alkbh2.640         | Alkbh2        | 231642    | LIB  | 640         |
| Alkbh2.641         | Alkbh2        | 231642    | LIB  | 641         |
| Alkbh3.552         | Alkbh3        | 69113     | LIB  | 552         |
| Alkbh3.843         | Alkbh3        | 69113     | LIB  | 843         |
| Alkbh3.901         | Alkbh3        | 69113     | LIB  | 901         |
| Alkbh3.1184        | Alkbh3        | 69113     | LIB  | 1184        |
| Aof2.1869          | Aof2          | 99982     | LIB  | 1869        |
| Aof2.1956          | Aof2          | 99982     | LIB  | 1956        |
| Aof2.2435          | Aof2          | 99982     | LIB  | 2435        |
| Aof2.2857          | Aof2          | 99982     | LIB  | 2857        |
| Ash1l.1031         | Ash1l         | 192195    | LIB  | 1031        |
| Ash1l.1280         | Ash1l         | 192195    | LIB  | 1280        |
| Ash1l.3810         | Ash1l         | 192195    | LIB  | 3810        |
| Ash1l.8132         | Ash1l         | 192195    | LIB  | 8132        |
| Ash1l.9540         | Ash1l         | 192195    | LIB  | 9540        |
| Ash2l.586          | Ash2l         | 23808     | LIB  | 586         |

|             |       |        |     |       |
|-------------|-------|--------|-----|-------|
| Ash2l.805   | Ash2l | 23808  | LIB | 805   |
| Ash2l.948   | Ash2l | 23808  | LIB | 948   |
| Ash2l.1135  | Ash2l | 23808  | LIB | 1135  |
| Ash2l.2130  | Ash2l | 23808  | LIB | 2130  |
| Asxl1.2020  | Asxl1 | 228790 | LIB | 2020  |
| Asxl1.3548  | Asxl1 | 228790 | LIB | 3548  |
| Asxl1.3785  | Asxl1 | 228790 | LIB | 3785  |
| Asxl1.4792  | Asxl1 | 228790 | LIB | 4792  |
| Asxl1.5221  | Asxl1 | 228790 | LIB | 5221  |
| Asxl1.6315  | Asxl1 | 228790 | LIB | 6315  |
| Asxl2.11    | Asxl2 | 75302  | LIB | 11    |
| Asxl2.4563  | Asxl2 | 75302  | LIB | 4563  |
| Asxl2.6593  | Asxl2 | 75302  | LIB | 6593  |
| Asxl2.7130  | Asxl2 | 75302  | LIB | 7130  |
| Asxl2.7253  | Asxl2 | 75302  | LIB | 7253  |
| Asxl3.6101  | Asxl3 | 211961 | LIB | 6101  |
| Asxl3.6824  | Asxl3 | 211961 | LIB | 6824  |
| Asxl3.8947  | Asxl3 | 211961 | LIB | 8947  |
| Asxl3.10021 | Asxl3 | 211961 | LIB | 10021 |
| Asxl3.11070 | Asxl3 | 211961 | LIB | 11070 |
| Asxl3.11073 | Asxl3 | 211961 | LIB | 11073 |
| Atm.137     | Atm   | 11920  | LIB | 137   |
| Atm.4098    | Atm   | 11920  | LIB | 4098  |
| Atm.4998    | Atm   | 11920  | LIB | 4998  |
| Atm.5616    | Atm   | 11920  | LIB | 5616  |
| Atm.7782    | Atm   | 11920  | LIB | 7782  |
| Atm.9396    | Atm   | 11920  | LIB | 9396  |
| Atr.1239    | Atr   | 245000 | LIB | 1239  |
| Atr.3160    | Atr   | 245000 | LIB | 3160  |
| Atr.4762    | Atr   | 245000 | LIB | 4762  |
| Atr.6186    | Atr   | 245000 | LIB | 6186  |
| Atr.7888    | Atr   | 245000 | LIB | 7888  |
| Atrx.2490   | Atrx  | 22589  | LIB | 2490  |

|            |       |        |     |      |
|------------|-------|--------|-----|------|
| Atrx.5490  | Atrx  | 22589  | LIB | 5490 |
| Atrx.6144  | Atrx  | 22589  | LIB | 6144 |
| Atrx.7173  | Atrx  | 22589  | LIB | 7173 |
| Atrx.7377  | Atrx  | 22589  | LIB | 7377 |
| Aurkb.520  | Aurkb | 20877  | LIB | 520  |
| Aurkb.631  | Aurkb | 20877  | LIB | 631  |
| Aurkb.917  | Aurkb | 20877  | LIB | 917  |
| Aurkb.928  | Aurkb | 20877  | LIB | 928  |
| Aurkb.1620 | Aurkb | 20877  | LIB | 1620 |
| Aurkb.1803 | Aurkb | 20877  | LIB | 1803 |
| Baz1a.2095 | Baz1a | 217578 | LIB | 2095 |
| Baz1a.2451 | Baz1a | 217578 | LIB | 2451 |
| Baz1a.4993 | Baz1a | 217578 | LIB | 4993 |
| Baz1a.5946 | Baz1a | 217578 | LIB | 5946 |
| Baz1b.801  | Baz1b | 22385  | LIB | 801  |
| Baz1b.3683 | Baz1b | 22385  | LIB | 3683 |
| Baz1b.5646 | Baz1b | 22385  | LIB | 5646 |
| Baz1b.6371 | Baz1b | 22385  | LIB | 6371 |
| Bmi1.698   | Bmi1  | 12151  | LIB | 698  |
| Bmi1.895   | Bmi1  | 12151  | LIB | 895  |
| Bmi1.1440  | Bmi1  | 12151  | LIB | 1440 |
| Bmi1.1746  | Bmi1  | 12151  | LIB | 1746 |
| Bmi1.2404  | Bmi1  | 12151  | LIB | 2404 |
| Bmi1.2561  | Bmi1  | 12151  | LIB | 2561 |
| Bop1.778   | Bop1  | 12181  | LIB | 778  |
| Bop1.2228  | Bop1  | 12181  | LIB | 2228 |
| Bop1.2403  | Bop1  | 12181  | LIB | 2403 |
| Bptf.1622  | Bptf  | 207165 | LIB | 1622 |
| Bptf.3234  | Bptf  | 207165 | LIB | 3234 |
| Bptf.7211  | Bptf  | 207165 | LIB | 7211 |
| Bptf.8224  | Bptf  | 207165 | LIB | 8224 |
| Braf.3750  | Braf  | 109880 | NC  | 3750 |
| Braf.3826  | Braf  | 109880 | NC  | 3826 |

|            |       |        |     |      |
|------------|-------|--------|-----|------|
| Braf.5053  | Braf  | 109880 | NC  | 5053 |
| Brd1.286   | Brd1  | 223770 | LIB | 286  |
| Brd1.287   | Brd1  | 223770 | LIB | 287  |
| Brd1.2096  | Brd1  | 223770 | LIB | 2096 |
| Brd1.4229  | Brd1  | 223770 | LIB | 4229 |
| Brd2.813   | Brd2  | 14312  | LIB | 813  |
| Brd2.1714  | Brd2  | 14312  | LIB | 1714 |
| Brd2.3011  | Brd2  | 14312  | LIB | 3011 |
| Brd2.3396  | Brd2  | 14312  | LIB | 3396 |
| Brd3.187   | Brd3  | 67382  | LIB | 187  |
| Brd3.298   | Brd3  | 67382  | LIB | 298  |
| Brd3.411   | Brd3  | 67382  | LIB | 411  |
| Brd3.4162  | Brd3  | 67382  | LIB | 4162 |
| Brd4.523   | Brd4  | 57261  | LIB | 523  |
| Brd4.552   | Brd4  | 57261  | LIB | 552  |
| Brd4.632   | Brd4  | 57261  | LIB | 632  |
| Brd4.1448  | Brd4  | 57261  | LIB | 1448 |
| Brd4.2097  | Brd4  | 57261  | LIB | 2097 |
| Carm1.892  | Carm1 | 59035  | LIB | 892  |
| Carm1.1222 | Carm1 | 59035  | LIB | 1222 |
| Carm1.1454 | Carm1 | 59035  | LIB | 1454 |
| Carm1.1614 | Carm1 | 59035  | LIB | 1614 |
| Carm1.1717 | Carm1 | 59035  | LIB | 1717 |
| Cbx1.1004  | Cbx1  | 12412  | LIB | 1004 |
| Cbx1.1053  | Cbx1  | 12412  | LIB | 1053 |
| Cbx1.1099  | Cbx1  | 12412  | LIB | 1099 |
| Cbx1.1103  | Cbx1  | 12412  | LIB | 1103 |
| Cbx1.1210  | Cbx1  | 12412  | LIB | 1210 |
| Cbx2.2033  | Cbx2  | 12416  | LIB | 2033 |
| Cbx2.3537  | Cbx2  | 12416  | LIB | 3537 |
| Cbx2.3545  | Cbx2  | 12416  | LIB | 3545 |
| Cbx2.3620  | Cbx2  | 12416  | LIB | 3620 |
| Cbx2.3706  | Cbx2  | 12416  | LIB | 3706 |

|             |        |        |     |      |
|-------------|--------|--------|-----|------|
| Cbx3.882    | Cbx3   | 12417  | LIB | 882  |
| Cbx3.1206   | Cbx3   | 12417  | LIB | 1206 |
| Cbx3.1339   | Cbx3   | 12417  | LIB | 1339 |
| Cbx3.1719   | Cbx3   | 12417  | LIB | 1719 |
| Cbx3.1735   | Cbx3   | 12417  | LIB | 1735 |
| Cbx4.1794   | Cbx4   | 12418  | LIB | 1794 |
| Cbx4.1844   | Cbx4   | 12418  | LIB | 1844 |
| Cbx4.2573   | Cbx4   | 12418  | LIB | 2573 |
| Cbx4.4403   | Cbx4   | 12418  | LIB | 4403 |
| Cbx4.5120   | Cbx4   | 12418  | LIB | 5120 |
| Cbx5.1309   | Cbx5   | 12419  | LIB | 1309 |
| Cbx5.4366   | Cbx5   | 12419  | LIB | 4366 |
| Cbx5.4409   | Cbx5   | 12419  | LIB | 4409 |
| Cbx5.4508   | Cbx5   | 12419  | LIB | 4508 |
| Cbx5.5707   | Cbx5   | 12419  | LIB | 5707 |
| Cbx5.8586   | Cbx5   | 12419  | LIB | 8586 |
| Cbx6.1535   | Cbx6   | 494448 | LIB | 1535 |
| Cbx6.3332   | Cbx6   | 494448 | LIB | 3332 |
| Cbx6.3473   | Cbx6   | 494448 | LIB | 3473 |
| Cbx6.3969   | Cbx6   | 494448 | LIB | 3969 |
| Cbx7.745    | Cbx7   | 52609  | LIB | 745  |
| Cbx7.1633   | Cbx7   | 52609  | LIB | 1633 |
| Cbx7.1634   | Cbx7   | 52609  | LIB | 1634 |
| Cbx7.1639   | Cbx7   | 52609  | LIB | 1639 |
| Cbx7.2006   | Cbx7   | 52609  | LIB | 2006 |
| Cbx7.2504   | Cbx7   | 52609  | LIB | 2504 |
| Cbx8.136    | Cbx8   | 30951  | LIB | 136  |
| Cbx8.1120   | Cbx8   | 30951  | LIB | 1120 |
| Cbx8.1342   | Cbx8   | 30951  | LIB | 1342 |
| Chaf1a.166  | Chaf1a | 27221  | LIB | 166  |
| Chaf1a.1039 | Chaf1a | 27221  | LIB | 1039 |
| Chaf1a.2122 | Chaf1a | 27221  | LIB | 2122 |
| Chaf1b.367  | Chaf1b | 110749 | LIB | 367  |



|             |        |        |     |      |
|-------------|--------|--------|-----|------|
| Chaf1b.566  | Chaf1b | 110749 | LIB | 566  |
| Chaf1b.692  | Chaf1b | 110749 | LIB | 692  |
| Chaf1b.901  | Chaf1b | 110749 | LIB | 901  |
| Chaf1b.1223 | Chaf1b | 110749 | LIB | 1223 |
| Chd1.746    | Chd1   | 12648  | LIB | 746  |
| Chd1.1103   | Chd1   | 12648  | LIB | 1103 |
| Chd1.2443   | Chd1   | 12648  | LIB | 2443 |
| Chd1.2959   | Chd1   | 12648  | LIB | 2959 |
| Chd1.4558   | Chd1   | 12648  | LIB | 4558 |
| Chd1l.2305  | Chd1l  | 68058  | LIB | 2305 |
| Chd1l.2598  | Chd1l  | 68058  | LIB | 2598 |
| Chd1l.2804  | Chd1l  | 68058  | LIB | 2804 |
| Chd2.926    | Chd2   | 244059 | LIB | 926  |
| Chd2.3700   | Chd2   | 244059 | LIB | 3700 |
| Chd2.3984   | Chd2   | 244059 | LIB | 3984 |
| Chd2.8087   | Chd2   | 244059 | LIB | 8087 |
| Chd2.8913   | Chd2   | 244059 | LIB | 8913 |
| Chd3.482    | Chd3   | 216848 | LIB | 482  |
| Chd3.3249   | Chd3   | 216848 | LIB | 3249 |
| Chd3.4011   | Chd3   | 216848 | LIB | 4011 |
| Chd3.6496   | Chd3   | 216848 | LIB | 6496 |
| Chd3.7148   | Chd3   | 216848 | LIB | 7148 |
| Chd3.7149   | Chd3   | 216848 | LIB | 7149 |
| Chd4.2060   | Chd4   | 107932 | LIB | 2060 |
| Chd4.3326   | Chd4   | 107932 | LIB | 3326 |
| Chd4.3423   | Chd4   | 107932 | LIB | 3423 |
| Chd4.3772   | Chd4   | 107932 | LIB | 3772 |
| Chd5.2301   | Chd5   | 269610 | LIB | 2301 |
| Chd5.2900   | Chd5   | 269610 | LIB | 2900 |
| Chd5.5471   | Chd5   | 269610 | LIB | 5471 |
| Chd5.6392   | Chd5   | 269610 | LIB | 6392 |
| Chd6.311    | Chd6   | 71389  | LIB | 311  |
| Chd6.4698   | Chd6   | 71389  | LIB | 4698 |

|             |        |        |     |       |
|-------------|--------|--------|-----|-------|
| Chd6.4988   | Chd6   | 71389  | LIB | 4988  |
| Chd6.9610   | Chd6   | 71389  | LIB | 9610  |
| Chd7.1269   | Chd7   | 320790 | LIB | 1269  |
| Chd7.1502   | Chd7   | 320790 | LIB | 1502  |
| Chd7.5857   | Chd7   | 320790 | LIB | 5857  |
| Chd7.6498   | Chd7   | 320790 | LIB | 6498  |
| Chd7.7229   | Chd7   | 320790 | LIB | 7229  |
| Chd8.434    | Chd8   | 67772  | LIB | 434   |
| Chd8.3265   | Chd8   | 67772  | LIB | 3265  |
| Chd8.4169   | Chd8   | 67772  | LIB | 4169  |
| Chd8.5352   | Chd8   | 67772  | LIB | 5352  |
| Chd8.6946   | Chd8   | 67772  | LIB | 6946  |
| Chd9.1402   | Chd9   | 109151 | LIB | 1402  |
| Chd9.3919   | Chd9   | 109151 | LIB | 3919  |
| Chd9.9352   | Chd9   | 109151 | LIB | 9352  |
| Chd9.10928  | Chd9   | 109151 | LIB | 10928 |
| Clock.693   | Clock  | 12753  | LIB | 693   |
| Clock.1387  | Clock  | 12753  | LIB | 1387  |
| Clock.4461  | Clock  | 12753  | LIB | 4461  |
| Clock.4611  | Clock  | 12753  | LIB | 4611  |
| Clock.5863  | Clock  | 12753  | LIB | 5863  |
| Crebbp.704  | Crebbp | 12914  | LIB | 704   |
| Crebbp.2064 | Crebbp | 12914  | LIB | 2064  |
| Crebbp.2118 | Crebbp | 12914  | LIB | 2118  |
| Crebbp.3582 | Crebbp | 12914  | LIB | 3582  |
| Crebbp.4463 | Crebbp | 12914  | LIB | 4463  |
| Ctsl.940    | Ctsl   | 13039  | LIB | 940   |
| Ctsl.1445   | Ctsl   | 13039  | LIB | 1445  |
| Ctsl.1941   | Ctsl   | 13039  | LIB | 1941  |
| Ctsl.1942   | Ctsl   | 13039  | LIB | 1942  |
| Ctsl.1947   | Ctsl   | 13039  | LIB | 1947  |
| Cxxc1.68    | Cxxc1  | 74322  | LIB | 68    |
| Cxxc1.359   | Cxxc1  | 74322  | LIB | 359   |

|             |        |        |     |      |
|-------------|--------|--------|-----|------|
| Cxxc1.1889  | Cxxc1  | 74322  | LIB | 1889 |
| Cxxc1.2034  | Cxxc1  | 74322  | LIB | 2034 |
| Cxxc1.2133  | Cxxc1  | 74322  | LIB | 2133 |
| Dmap1.439   | Dmap1  | 66233  | LIB | 439  |
| Dmap1.518   | Dmap1  | 66233  | LIB | 518  |
| Dmap1.1354  | Dmap1  | 66233  | LIB | 1354 |
| Dmap1.1355  | Dmap1  | 66233  | LIB | 1355 |
| Dmap1.1487  | Dmap1  | 66233  | LIB | 1487 |
| Dnmt1.437   | Dnmt1  | 13433  | LIB | 437  |
| Dnmt1.828   | Dnmt1  | 13433  | LIB | 828  |
| Dnmt1.1137  | Dnmt1  | 13433  | LIB | 1137 |
| Dnmt1.4462  | Dnmt1  | 13433  | LIB | 4462 |
| Dnmt1.4848  | Dnmt1  | 13433  | LIB | 4848 |
| Dnmt3a.16   | Dnmt3a | 13435  | LIB | 16   |
| Dnmt3a.1669 | Dnmt3a | 13435  | LIB | 1669 |
| Dnmt3a.2338 | Dnmt3a | 13435  | LIB | 2338 |
| Dnmt3a.4173 | Dnmt3a | 13435  | LIB | 4173 |
| Dnmt3b.275  | Dnmt3b | 13436  | LIB | 275  |
| Dnmt3b.579  | Dnmt3b | 13436  | LIB | 579  |
| Dnmt3b.958  | Dnmt3b | 13436  | LIB | 958  |
| Dnmt3b.2218 | Dnmt3b | 13436  | LIB | 2218 |
| Dnmt3l.306  | Dnmt3l | 54427  | LIB | 306  |
| Dnmt3l.760  | Dnmt3l | 54427  | LIB | 760  |
| Dnmt3l.1049 | Dnmt3l | 54427  | LIB | 1049 |
| Dnmt3l.1333 | Dnmt3l | 54427  | LIB | 1333 |
| Dnmt3l.1350 | Dnmt3l | 54427  | LIB | 1350 |
| Dot1l.602   | Dot1l  | 208266 | LIB | 602  |
| Dot1l.941   | Dot1l  | 208266 | LIB | 941  |
| Dot1l.3626  | Dot1l  | 208266 | LIB | 3626 |
| Dub2a.769   | Dub2a  | 384701 | LIB | 769  |
| Dub2a.1334  | Dub2a  | 384701 | LIB | 1334 |
| Dub2a.1391  | Dub2a  | 384701 | LIB | 1391 |
| Dub2a.1397  | Dub2a  | 384701 | LIB | 1397 |

|               |          |        |     |      |
|---------------|----------|--------|-----|------|
| Dub2a.1444    | Dub2a    | 384701 | LIB | 1444 |
| Dub2a.1445    | Dub2a    | 384701 | LIB | 1445 |
| Edf1.486      | Edf1     | 59022  | LIB | 486  |
| Edf1.628      | Edf1     | 59022  | LIB | 628  |
| Edf1.631      | Edf1     | 59022  | LIB | 631  |
| Edf1.652      | Edf1     | 59022  | LIB | 652  |
| Eed.710       | Eed      | 13626  | LIB | 710  |
| Eed.949       | Eed      | 13626  | LIB | 949  |
| Eed.1083      | Eed      | 13626  | LIB | 1083 |
| Eed.1397      | Eed      | 13626  | LIB | 1397 |
| Eed.1820      | Eed      | 13626  | LIB | 1820 |
| EG330129.869  | EG330129 | 330129 | LIB | 869  |
| EG330129.2118 | EG330129 | 330129 | LIB | 2118 |
| EG330129.2262 | EG330129 | 330129 | LIB | 2262 |
| EG330129.2329 | EG330129 | 330129 | LIB | 2329 |
| EG546387.1344 | EG546387 | 546387 | LIB | 1344 |
| EG546387.2159 | EG546387 | 546387 | LIB | 2159 |
| EG546387.2272 | EG546387 | 546387 | LIB | 2272 |
| Ehmt1.66      | Ehmt1    | 77683  | LIB | 66   |
| Ehmt1.386     | Ehmt1    | 77683  | LIB | 386  |
| Ehmt1.859     | Ehmt1    | 77683  | LIB | 859  |
| Ehmt1.920     | Ehmt1    | 77683  | LIB | 920  |
| Ehmt1.3003    | Ehmt1    | 77683  | LIB | 3003 |
| Ehmt2.724     | Ehmt2    | 110147 | LIB | 724  |
| Ehmt2.1880    | Ehmt2    | 110147 | LIB | 1880 |
| Ehmt2.2014    | Ehmt2    | 110147 | LIB | 2014 |
| Ehmt2.3146    | Ehmt2    | 110147 | LIB | 3146 |
| Ehmt2.3202    | Ehmt2    | 110147 | LIB | 3202 |
| Elp3.117      | Elp3     | 74195  | LIB | 117  |
| Elp3.215      | Elp3     | 74195  | LIB | 215  |
| Elp3.219      | Elp3     | 74195  | LIB | 219  |
| Elp3.592      | Elp3     | 74195  | LIB | 592  |
| Ep300.754     | Ep300    | 328572 | LIB | 754  |

|             |        |        |     |      |
|-------------|--------|--------|-----|------|
| Ep300.3850  | Ep300  | 328572 | LIB | 3850 |
| Ep300.5490  | Ep300  | 328572 | LIB | 5490 |
| Ep300.7826  | Ep300  | 328572 | LIB | 7826 |
| Ep300.8647  | Ep300  | 328572 | LIB | 8647 |
| Evi1.649    | Evi1   | 14013  | LIB | 649  |
| Evi1.652    | Evi1   | 14013  | LIB | 652  |
| Evi1.1371   | Evi1   | 14013  | LIB | 1371 |
| Evi1.1978   | Evi1   | 14013  | LIB | 1978 |
| Evi1.2720   | Evi1   | 14013  | LIB | 2720 |
| Ezh1.68     | Ezh1   | 14055  | LIB | 68   |
| Ezh1.73     | Ezh1   | 14055  | LIB | 73   |
| Ezh1.4104   | Ezh1   | 14055  | LIB | 4104 |
| Ezh1.4105   | Ezh1   | 14055  | LIB | 4105 |
| Ezh2.556    | Ezh2   | 14056  | LIB | 556  |
| Ezh2.1370   | Ezh2   | 14056  | LIB | 1370 |
| Ezh2.1678   | Ezh2   | 14056  | LIB | 1678 |
| Ezh2.2124   | Ezh2   | 14056  | LIB | 2124 |
| Ezh2.2253   | Ezh2   | 14056  | LIB | 2253 |
| Fbxl10.356  | Fbxl10 | 30841  | LIB | 356  |
| Fbxl10.443  | Fbxl10 | 30841  | LIB | 443  |
| Fbxl10.3131 | Fbxl10 | 30841  | LIB | 3131 |
| Fbxl10.3145 | Fbxl10 | 30841  | LIB | 3145 |
| Fbxl11.663  | Fbxl11 | 225876 | LIB | 663  |
| Fbxl11.1840 | Fbxl11 | 225876 | LIB | 1840 |
| Fbxl11.7144 | Fbxl11 | 225876 | LIB | 7144 |
| Fbxl11.7145 | Fbxl11 | 225876 | LIB | 7145 |
| Fbxl19.1945 | Fbxl19 | 233902 | LIB | 1945 |
| Fbxl19.2841 | Fbxl19 | 233902 | LIB | 2841 |
| Fbxl19.3203 | Fbxl19 | 233902 | LIB | 3203 |
| Fkbp1a.646  | Fkbp1a | 14225  | LIB | 646  |
| Fkbp1a.827  | Fkbp1a | 14225  | LIB | 827  |
| Fkbp1a.851  | Fkbp1a | 14225  | LIB | 851  |
| Fkbp1a.854  | Fkbp1a | 14225  | LIB | 854  |

|             |        |        |     |      |
|-------------|--------|--------|-----|------|
| Fkbp2.195   | Fkbp2  | 14227  | LIB | 195  |
| Fkbp2.213   | Fkbp2  | 14227  | LIB | 213  |
| Fkbp2.532   | Fkbp2  | 14227  | LIB | 532  |
| Fkbp2.581   | Fkbp2  | 14227  | LIB | 581  |
| Fkbp5.595   | Fkbp5  | 14229  | LIB | 595  |
| Fkbp5.628   | Fkbp5  | 14229  | LIB | 628  |
| Fkbp5.1219  | Fkbp5  | 14229  | LIB | 1219 |
| Fkbp5.2613  | Fkbp5  | 14229  | LIB | 2613 |
| Fkbp5.2813  | Fkbp5  | 14229  | LIB | 2813 |
| Fkbp5.3272  | Fkbp5  | 14229  | LIB | 3272 |
| Gtf3c4.2358 | Gtf3c4 | 269252 | LIB | 2358 |
| Gtf3c4.2444 | Gtf3c4 | 269252 | LIB | 2444 |
| Gtf3c4.2605 | Gtf3c4 | 269252 | LIB | 2605 |
| Gtf3c4.3160 | Gtf3c4 | 269252 | LIB | 3160 |
| Gtf3c4.3163 | Gtf3c4 | 269252 | LIB | 3163 |
| H2afz.508   | H2afz  | 51788  | LIB | 508  |
| H2afz.692   | H2afz  | 51788  | LIB | 692  |
| H2afz.823   | H2afz  | 51788  | LIB | 823  |
| H2afz.909   | H2afz  | 51788  | LIB | 909  |
| H2afz.937   | H2afz  | 51788  | LIB | 937  |
| Hat1.290    | Hat1   | 107435 | LIB | 290  |
| Hat1.638    | Hat1   | 107435 | LIB | 638  |
| Hat1.866    | Hat1   | 107435 | LIB | 866  |
| Hat1.1528   | Hat1   | 107435 | LIB | 1528 |
| Hcfc1.812   | Hcfc1  | 15161  | LIB | 812  |
| Hcfc1.4648  | Hcfc1  | 15161  | LIB | 4648 |
| Hcfc1.7430  | Hcfc1  | 15161  | LIB | 7430 |
| Hcfc1.7506  | Hcfc1  | 15161  | LIB | 7506 |
| Hcfc1.8014  | Hcfc1  | 15161  | LIB | 8014 |
| Hdac1.245   | Hdac1  | 433759 | LIB | 245  |
| Hdac1.1053  | Hdac1  | 433759 | LIB | 1053 |
| Hdac1.1065  | Hdac1  | 433759 | LIB | 1065 |
| Hdac1.1830  | Hdac1  | 433759 | LIB | 1830 |

|             |        |        |     |      |
|-------------|--------|--------|-----|------|
| Hdac10.1645 | Hdac10 | 170787 | LIB | 1645 |
| Hdac10.2041 | Hdac10 | 170787 | LIB | 2041 |
| Hdac10.2307 | Hdac10 | 170787 | LIB | 2307 |
| Hdac11.2025 | Hdac11 | 232232 | LIB | 2025 |
| Hdac11.2058 | Hdac11 | 232232 | LIB | 2058 |
| Hdac11.2182 | Hdac11 | 232232 | LIB | 2182 |
| Hdac11.2460 | Hdac11 | 232232 | LIB | 2460 |
| Hdac11.2461 | Hdac11 | 232232 | LIB | 2461 |
| Hdac2.439   | Hdac2  | 15182  | LIB | 439  |
| Hdac2.440   | Hdac2  | 15182  | LIB | 440  |
| Hdac2.1184  | Hdac2  | 15182  | LIB | 1184 |
| Hdac2.1611  | Hdac2  | 15182  | LIB | 1611 |
| Hdac2.1919  | Hdac2  | 15182  | LIB | 1919 |
| Hdac3.161   | Hdac3  | 15183  | LIB | 161  |
| Hdac3.854   | Hdac3  | 15183  | LIB | 854  |
| Hdac3.987   | Hdac3  | 15183  | LIB | 987  |
| Hdac3.1037  | Hdac3  | 15183  | LIB | 1037 |
| Hdac3.1491  | Hdac3  | 15183  | LIB | 1491 |
| Hdac4.331   | Hdac4  | 208727 | LIB | 331  |
| Hdac4.431   | Hdac4  | 208727 | LIB | 431  |
| Hdac4.1903  | Hdac4  | 208727 | LIB | 1903 |
| Hdac4.3273  | Hdac4  | 208727 | LIB | 3273 |
| Hdac5.1115  | Hdac5  | 15184  | LIB | 1115 |
| Hdac5.1936  | Hdac5  | 15184  | LIB | 1936 |
| Hdac5.2060  | Hdac5  | 15184  | LIB | 2060 |
| Hdac5.2412  | Hdac5  | 15184  | LIB | 2412 |
| Hdac5.2886  | Hdac5  | 15184  | LIB | 2886 |
| Hdac6.530   | Hdac6  | 15185  | LIB | 530  |
| Hdac6.2249  | Hdac6  | 15185  | LIB | 2249 |
| Hdac6.3838  | Hdac6  | 15185  | LIB | 3838 |
| Hdac6.4026  | Hdac6  | 15185  | LIB | 4026 |
| Hdac7.560   | Hdac7  | 56233  | LIB | 560  |
| Hdac7.836   | Hdac7  | 56233  | LIB | 836  |

|            |       |       |     |      |
|------------|-------|-------|-----|------|
| Hdac7.1293 | Hdac7 | 56233 | LIB | 1293 |
| Hdac7.2255 | Hdac7 | 56233 | LIB | 2255 |
| Hdac7.3429 | Hdac7 | 56233 | LIB | 3429 |
| Hdac8.296  | Hdac8 | 70315 | LIB | 296  |
| Hdac8.397  | Hdac8 | 70315 | LIB | 397  |
| Hdac8.900  | Hdac8 | 70315 | LIB | 900  |
| Hdac8.1692 | Hdac8 | 70315 | LIB | 1692 |
| Hdac9.1236 | Hdac9 | 79221 | LIB | 1236 |
| Hdac9.1449 | Hdac9 | 79221 | LIB | 1449 |
| Hdac9.2031 | Hdac9 | 79221 | LIB | 2031 |
| Hdac9.2070 | Hdac9 | 79221 | LIB | 2070 |
| Hdac9.4083 | Hdac9 | 79221 | LIB | 4083 |
| Hells.977  | Hells | 15201 | LIB | 977  |
| Hells.1094 | Hells | 15201 | LIB | 1094 |
| Hells.1145 | Hells | 15201 | LIB | 1145 |
| Hells.1703 | Hells | 15201 | LIB | 1703 |
| Hells.2323 | Hells | 15201 | LIB | 2323 |
| Hira.223   | Hira  | 15260 | LIB | 223  |
| Hira.2318  | Hira  | 15260 | LIB | 2318 |
| Hira.2835  | Hira  | 15260 | LIB | 2835 |
| Hira.4298  | Hira  | 15260 | LIB | 4298 |
| Hlrf.252   | Hlrf  | 20585 | LIB | 252  |
| Hlrf.455   | Hlrf  | 20585 | LIB | 455  |
| Hlrf.497   | Hlrf  | 20585 | LIB | 497  |
| Hlrf.1198  | Hlrf  | 20585 | LIB | 1198 |
| Ing2.649   | Ing2  | 69260 | LIB | 649  |
| Ing2.1400  | Ing2  | 69260 | LIB | 1400 |
| Ing2.1788  | Ing2  | 69260 | LIB | 1788 |
| Ing2.1824  | Ing2  | 69260 | LIB | 1824 |
| Ing2.2176  | Ing2  | 69260 | LIB | 2176 |
| Ino80.458  | Ino80 | 68142 | LIB | 458  |
| Ino80.1194 | Ino80 | 68142 | LIB | 1194 |
| Ino80.2062 | Ino80 | 68142 | LIB | 2062 |



|               |         |        |     |       |
|---------------|---------|--------|-----|-------|
| Ino80.4069    | Ino80   | 68142  | LIB | 4069  |
| Jarid1a.2826  | Jarid1a | 214899 | LIB | 2826  |
| Jarid1a.6729  | Jarid1a | 214899 | LIB | 6729  |
| Jarid1a.10299 | Jarid1a | 214899 | LIB | 10299 |
| Jarid1a.10802 | Jarid1a | 214899 | LIB | 10802 |
| Jarid1a.11640 | Jarid1a | 214899 | LIB | 11640 |
| Jarid1b.382   | Jarid1b | 75605  | LIB | 382   |
| Jarid1b.1671  | Jarid1b | 75605  | LIB | 1671  |
| Jarid1b.2176  | Jarid1b | 75605  | LIB | 2176  |
| Jarid1b.4339  | Jarid1b | 75605  | LIB | 4339  |
| Jarid1b.4527  | Jarid1b | 75605  | LIB | 4527  |
| Jarid1c.1882  | Jarid1c | 20591  | LIB | 1882  |
| Jarid1c.1886  | Jarid1c | 20591  | LIB | 1886  |
| Jarid1c.2010  | Jarid1c | 20591  | LIB | 2010  |
| Jarid1c.5632  | Jarid1c | 20591  | LIB | 5632  |
| Jarid1d.2138  | Jarid1d | 20592  | LIB | 2138  |
| Jarid1d.2800  | Jarid1d | 20592  | LIB | 2800  |
| Jarid1d.3002  | Jarid1d | 20592  | LIB | 3002  |
| Jarid1d.4830  | Jarid1d | 20592  | LIB | 4830  |
| Jarid2.1699   | Jarid2  | 16468  | LIB | 1699  |
| Jarid2.2191   | Jarid2  | 16468  | LIB | 2191  |
| Jarid2.3219   | Jarid2  | 16468  | LIB | 3219  |
| Jhdm1d.2087   | Jhdm1d  | 338523 | LIB | 2087  |
| Jhdm1d.2209   | Jhdm1d  | 338523 | LIB | 2209  |
| Jhdm1d.3273   | Jhdm1d  | 338523 | LIB | 3273  |
| Jhdm1d.6787   | Jhdm1d  | 338523 | LIB | 6787  |
| Jhdm1d.8524   | Jhdm1d  | 338523 | LIB | 8524  |
| Jmjd1a.371    | Jmjd1a  | 104263 | LIB | 371   |
| Jmjd1a.753    | Jmjd1a  | 104263 | LIB | 753   |
| Jmjd1a.1070   | Jmjd1a  | 104263 | LIB | 1070  |
| Jmjd1a.3518   | Jmjd1a  | 104263 | LIB | 3518  |
| Jmjd1b.1014   | Jmjd1b  | 277250 | LIB | 1014  |
| Jmjd1b.3708   | Jmjd1b  | 277250 | LIB | 3708  |

|             |        |        |     |      |
|-------------|--------|--------|-----|------|
| Jmjd1b.5309 | Jmjd1b | 277250 | LIB | 5309 |
| Jmjd1b.6406 | Jmjd1b | 277250 | LIB | 6406 |
| Jmjd1b.6504 | Jmjd1b | 277250 | LIB | 6504 |
| Jmjd1c.649  | Jmjd1c | 108829 | LIB | 649  |
| Jmjd1c.3196 | Jmjd1c | 108829 | LIB | 3196 |
| Jmjd1c.4221 | Jmjd1c | 108829 | LIB | 4221 |
| Jmjd1c.6050 | Jmjd1c | 108829 | LIB | 6050 |
| Jmjd1c.6346 | Jmjd1c | 108829 | LIB | 6346 |
| Jmjd2a.424  | Jmjd2a | 230674 | LIB | 424  |
| Jmjd2a.663  | Jmjd2a | 230674 | LIB | 663  |
| Jmjd2a.1474 | Jmjd2a | 230674 | LIB | 1474 |
| Jmjd2a.1498 | Jmjd2a | 230674 | LIB | 1498 |
| Jmjd2a.3033 | Jmjd2a | 230674 | LIB | 3033 |
| Jmjd2b.1151 | Jmjd2b | 193796 | LIB | 1151 |
| Jmjd2b.2905 | Jmjd2b | 193796 | LIB | 2905 |
| Jmjd2b.4018 | Jmjd2b | 193796 | LIB | 4018 |
| Jmjd2b.4170 | Jmjd2b | 193796 | LIB | 4170 |
| Jmjd2c.738  | Jmjd2c | 76804  | LIB | 738  |
| Jmjd2c.1217 | Jmjd2c | 76804  | LIB | 1217 |
| Jmjd2c.3112 | Jmjd2c | 76804  | LIB | 3112 |
| Jmjd2c.3541 | Jmjd2c | 76804  | LIB | 3541 |
| Jmjd2d.301  | Jmjd2d | 244694 | LIB | 301  |
| Jmjd2d.450  | Jmjd2d | 244694 | LIB | 450  |
| Jmjd2d.1143 | Jmjd2d | 244694 | LIB | 1143 |
| Jmjd2d.2310 | Jmjd2d | 244694 | LIB | 2310 |
| Jmjd2d.2358 | Jmjd2d | 244694 | LIB | 2358 |
| Jmjd4.1722  | Jmjd4  | 194952 | LIB | 1722 |
| Jmjd4.1796  | Jmjd4  | 194952 | LIB | 1796 |
| Jmjd4.2677  | Jmjd4  | 194952 | LIB | 2677 |
| Jmjd4.2749  | Jmjd4  | 194952 | LIB | 2749 |
| Jmjd4.3327  | Jmjd4  | 194952 | LIB | 3327 |
| Jmjd5.18    | Jmjd5  | 77035  | LIB | 18   |
| Jmjd5.1123  | Jmjd5  | 77035  | LIB | 1123 |

|                   |              |           |     |      |
|-------------------|--------------|-----------|-----|------|
| Jmjd5.1291        | Jmjd5        | 77035     | LIB | 1291 |
| Jmjd5.1564        | Jmjd5        | 77035     | LIB | 1564 |
| Jmjd5.2041        | Jmjd5        | 77035     | LIB | 2041 |
| Jmjd6.254         | Jmjd6        | 107817    | LIB | 254  |
| Jmjd6.530         | Jmjd6        | 107817    | LIB | 530  |
| Jmjd6.956         | Jmjd6        | 107817    | LIB | 956  |
| Jmjd6.1633        | Jmjd6        | 107817    | LIB | 1633 |
| Kat2a.542         | Kat2a        | 14534     | LIB | 542  |
| Kat2a.1771        | Kat2a        | 14534     | LIB | 1771 |
| Kat2a.2053        | Kat2a        | 14534     | LIB | 2053 |
| Kat2a.2201        | Kat2a        | 14534     | LIB | 2201 |
| Kat2b.1306        | Kat2b        | 18519     | LIB | 1306 |
| Kat2b.2624        | Kat2b        | 18519     | LIB | 2624 |
| Kat2b.3228        | Kat2b        | 18519     | LIB | 3228 |
| Kat2b.3494        | Kat2b        | 18519     | LIB | 3494 |
| Kat2b.3766        | Kat2b        | 18519     | LIB | 3766 |
| Kat5.679          | Kat5         | 81601     | LIB | 679  |
| Kat5.1193         | Kat5         | 81601     | LIB | 1193 |
| Kat5.1242         | Kat5         | 81601     | LIB | 1242 |
| Kat5.1387         | Kat5         | 81601     | LIB | 1387 |
| L3mbtl.263        | L3mbtl       | 241764    | LIB | 263  |
| L3mbtl.373        | L3mbtl       | 241764    | LIB | 373  |
| L3mbtl.725        | L3mbtl       | 241764    | LIB | 725  |
| L3mbtl.1906       | L3mbtl       | 241764    | LIB | 1906 |
| L3mbtl.2689       | L3mbtl       | 241764    | LIB | 2689 |
| LOC100040412.49   | LOC100040412 | 100040412 | LIB | 49   |
| LOC100040412.495  | LOC100040412 | 100040412 | LIB | 495  |
| LOC100040412.655  | LOC100040412 | 100040412 | LIB | 655  |
| LOC100040412.1128 | LOC100040412 | 100040412 | LIB | 1128 |
| LOC100044324.736  | LOC100044324 | 100044324 | LIB | 736  |
| LOC100044324.927  | LOC100044324 | 100044324 | LIB | 927  |
| LOC100044324.1075 | LOC100044324 | 100044324 | LIB | 1075 |
| LOC100044324.1240 | LOC100044324 | 100044324 | LIB | 1240 |

|                   |              |           |     |      |
|-------------------|--------------|-----------|-----|------|
| LOC100044324.1314 | LOC100044324 | 100044324 | LIB | 1314 |
| LOC100048887.186  | LOC100048887 | 100048887 | LIB | 186  |
| LOC100048887.194  | LOC100048887 | 100048887 | LIB | 194  |
| LOC100048887.732  | LOC100048887 | 100048887 | LIB | 732  |
| LOC100048887.787  | LOC100048887 | 100048887 | LIB | 787  |
| LOC100048887.803  | LOC100048887 | 100048887 | LIB | 803  |
| LOC664892.1494    | LOC664892    | 664892    | LIB | 1494 |
| LOC664892.1500    | LOC664892    | 664892    | LIB | 1500 |
| LOC664892.1697    | LOC664892    | 664892    | LIB | 1697 |
| LOC664892.1892    | LOC664892    | 664892    | LIB | 1892 |
| LOC664892.2169    | LOC664892    | 664892    | LIB | 2169 |
| Mbd1.746          | Mbd1         | 17190     | LIB | 746  |
| Mbd1.1387         | Mbd1         | 17190     | LIB | 1387 |
| Mbd1.1856         | Mbd1         | 17190     | LIB | 1856 |
| Mbd1.2237         | Mbd1         | 17190     | LIB | 2237 |
| Mbd2.938          | Mbd2         | 17191     | LIB | 938  |
| Mbd2.1117         | Mbd2         | 17191     | LIB | 1117 |
| Mbd2.1545         | Mbd2         | 17191     | LIB | 1545 |
| Mbd2.1763         | Mbd2         | 17191     | LIB | 1763 |
| Mbd2.1823         | Mbd2         | 17191     | LIB | 1823 |
| Mbd3.579          | Mbd3         | 17192     | LIB | 579  |
| Mbd3.1147         | Mbd3         | 17192     | LIB | 1147 |
| Mbd3.1354         | Mbd3         | 17192     | LIB | 1354 |
| Mbd3.1452         | Mbd3         | 17192     | LIB | 1452 |
| Mbd3.1551         | Mbd3         | 17192     | LIB | 1551 |
| Mbd4.434          | Mbd4         | 17193     | LIB | 434  |
| Mbd4.1027         | Mbd4         | 17193     | LIB | 1027 |
| Mbd4.3297         | Mbd4         | 17193     | LIB | 3297 |
| Mbd4.3541         | Mbd4         | 17193     | LIB | 3541 |
| Mds1.87           | Mds1         | 17251     | LIB | 87   |
| Mds1.651          | Mds1         | 17251     | LIB | 651  |
| Mds1.764          | Mds1         | 17251     | LIB | 764  |
| Mds1.874          | Mds1         | 17251     | LIB | 874  |

|             |        |        |     |       |
|-------------|--------|--------|-----|-------|
| Mecp2.1627  | Mecp2  | 17257  | LIB | 1627  |
| Mecp2.2287  | Mecp2  | 17257  | LIB | 2287  |
| Mecp2.5438  | Mecp2  | 17257  | LIB | 5438  |
| Mecp2.7745  | Mecp2  | 17257  | LIB | 7745  |
| Men1.219    | Men1   | 17283  | LIB | 219   |
| Men1.228    | Men1   | 17283  | LIB | 228   |
| Men1.1457   | Men1   | 17283  | LIB | 1457  |
| Men1.2310   | Men1   | 17283  | LIB | 2310  |
| Men1.2707   | Men1   | 17283  | LIB | 2707  |
| Mettl8.846  | Mettl8 | 228019 | LIB | 846   |
| Mettl8.1184 | Mettl8 | 228019 | LIB | 1184  |
| Mettl8.1353 | Mettl8 | 228019 | LIB | 1353  |
| Mettl8.1914 | Mettl8 | 228019 | LIB | 1914  |
| Mettl8.1990 | Mettl8 | 228019 | LIB | 1990  |
| Mgmt.384    | Mgmt   | 17314  | LIB | 384   |
| Mgmt.412    | Mgmt   | 17314  | LIB | 412   |
| Mgmt.433    | Mgmt   | 17314  | LIB | 433   |
| Mgmt.672    | Mgmt   | 17314  | LIB | 672   |
| Mgmt.730    | Mgmt   | 17314  | LIB | 730   |
| MII1.4195   | MII1   | 214162 | LIB | 4195  |
| MII1.11050  | MII1   | 214162 | LIB | 11050 |
| MII1.13303  | MII1   | 214162 | LIB | 13303 |
| MII1.16168  | MII1   | 214162 | LIB | 16168 |
| MII2.4285   | MII2   | 381022 | LIB | 4285  |
| MII2.5430   | MII2   | 381022 | LIB | 5430  |
| MII2.6153   | MII2   | 381022 | LIB | 6153  |
| MII2.11374  | MII2   | 381022 | LIB | 11374 |
| MII2.12943  | MII2   | 381022 | LIB | 12943 |
| MII3.1099   | MII3   | 231051 | LIB | 1099  |
| MII3.2993   | MII3   | 231051 | LIB | 2993  |
| MII3.5304   | MII3   | 231051 | LIB | 5304  |
| MII3.6232   | MII3   | 231051 | LIB | 6232  |
| MII3.15396  | MII3   | 231051 | LIB | 15396 |

|              |         |        |     |      |
|--------------|---------|--------|-----|------|
| Morf4I1.281  | Morf4I1 | 21761  | LIB | 281  |
| Morf4I1.603  | Morf4I1 | 21761  | LIB | 603  |
| Morf4I1.639  | Morf4I1 | 21761  | LIB | 639  |
| Morf4I1.1034 | Morf4I1 | 21761  | LIB | 1034 |
| Morf4I1.1245 | Morf4I1 | 21761  | LIB | 1245 |
| Mta1.213     | Mta1    | 116870 | LIB | 213  |
| Mta1.1003    | Mta1    | 116870 | LIB | 1003 |
| Mta1.1053    | Mta1    | 116870 | LIB | 1053 |
| Mta1.1147    | Mta1    | 116870 | LIB | 1147 |
| Mta1.1363    | Mta1    | 116870 | LIB | 1363 |
| Mta2.511     | Mta2    | 23942  | LIB | 511  |
| Mta2.924     | Mta2    | 23942  | LIB | 924  |
| Mta2.1284    | Mta2    | 23942  | LIB | 1284 |
| Mta2.2013    | Mta2    | 23942  | LIB | 2013 |
| Mta3.222     | Mta3    | 116871 | LIB | 222  |
| Mta3.553     | Mta3    | 116871 | LIB | 553  |
| Mta3.1523    | Mta3    | 116871 | LIB | 1523 |
| Mta3.1663    | Mta3    | 116871 | LIB | 1663 |
| Myst1.643    | Myst1   | 67773  | LIB | 643  |
| Myst1.724    | Myst1   | 67773  | LIB | 724  |
| Myst1.1250   | Myst1   | 67773  | LIB | 1250 |
| Myst1.1302   | Myst1   | 67773  | LIB | 1302 |
| Myst2.176    | Myst2   | 217127 | LIB | 176  |
| Myst2.507    | Myst2   | 217127 | LIB | 507  |
| Myst2.1183   | Myst2   | 217127 | LIB | 1183 |
| Myst2.3099   | Myst2   | 217127 | LIB | 3099 |
| Myst3.2590   | Myst3   | 244349 | LIB | 2590 |
| Myst3.3127   | Myst3   | 244349 | LIB | 3127 |
| Myst3.3485   | Myst3   | 244349 | LIB | 3485 |
| Myst3.4554   | Myst3   | 244349 | LIB | 4554 |
| Myst3.6844   | Myst3   | 244349 | LIB | 6844 |
| Myst4.3568   | Myst4   | 54169  | LIB | 3568 |
| Myst4.5452   | Myst4   | 54169  | LIB | 5452 |

|             |        |       |     |       |
|-------------|--------|-------|-----|-------|
| Myst4.6527  | Myst4  | 54169 | LIB | 6527  |
| Myst4.6644  | Myst4  | 54169 | LIB | 6644  |
| Nap1I1.2360 | Nap1I1 | 53605 | LIB | 2360  |
| Nap1I1.2470 | Nap1I1 | 53605 | LIB | 2470  |
| Nap1I1.3414 | Nap1I1 | 53605 | LIB | 3414  |
| Nap1I1.3554 | Nap1I1 | 53605 | LIB | 3554  |
| Nap1I2.819  | Nap1I2 | 17954 | LIB | 819   |
| Nap1I2.1093 | Nap1I2 | 17954 | LIB | 1093  |
| Nap1I2.1180 | Nap1I2 | 17954 | LIB | 1180  |
| Nap1I2.1695 | Nap1I2 | 17954 | LIB | 1695  |
| Nap1I2.1750 | Nap1I2 | 17954 | LIB | 1750  |
| Nap1I3.743  | Nap1I3 | 54561 | LIB | 743   |
| Nap1I3.779  | Nap1I3 | 54561 | LIB | 779   |
| Nap1I3.1969 | Nap1I3 | 54561 | LIB | 1969  |
| Nap1I3.2063 | Nap1I3 | 54561 | LIB | 2063  |
| Nap1I3.2498 | Nap1I3 | 54561 | LIB | 2498  |
| Ncoa3.1032  | Ncoa3  | 17979 | LIB | 1032  |
| Ncoa3.3669  | Ncoa3  | 17979 | LIB | 3669  |
| Ncoa3.3815  | Ncoa3  | 17979 | LIB | 3815  |
| Ncoa3.3885  | Ncoa3  | 17979 | LIB | 3885  |
| Ncoa3.7494  | Ncoa3  | 17979 | LIB | 7494  |
| Nr0b2.381   | Nr0b2  | 23957 | LIB | 381   |
| Nr0b2.534   | Nr0b2  | 23957 | LIB | 534   |
| Nr0b2.558   | Nr0b2  | 23957 | LIB | 558   |
| Nr0b2.1023  | Nr0b2  | 23957 | LIB | 1023  |
| Nr0b2.1068  | Nr0b2  | 23957 | LIB | 1068  |
| Nsd1.2795   | Nsd1   | 18193 | LIB | 2795  |
| Nsd1.5598   | Nsd1   | 18193 | LIB | 5598  |
| Nsd1.5640   | Nsd1   | 18193 | LIB | 5640  |
| Nsd1.11634  | Nsd1   | 18193 | LIB | 11634 |
| Padi4.295   | Padi4  | 18602 | LIB | 295   |
| Padi4.1042  | Padi4  | 18602 | LIB | 1042  |
| Padi4.1058  | Padi4  | 18602 | LIB | 1058  |

|             |        |       |     |      |
|-------------|--------|-------|-----|------|
| Padi4.1914  | Padi4  | 18602 | LIB | 1914 |
| Padi4.2336  | Padi4  | 18602 | LIB | 2336 |
| Parp1.1124  | Parp1  | 11545 | LIB | 1124 |
| Parp1.1623  | Parp1  | 11545 | LIB | 1623 |
| Parp1.2887  | Parp1  | 11545 | LIB | 2887 |
| Parp1.3789  | Parp1  | 11545 | LIB | 3789 |
| Parp1.3790  | Parp1  | 11545 | LIB | 3790 |
| Parp2.574   | Parp2  | 11546 | LIB | 574  |
| Parp2.905   | Parp2  | 11546 | LIB | 905  |
| Parp2.946   | Parp2  | 11546 | LIB | 946  |
| Parp2.1006  | Parp2  | 11546 | LIB | 1006 |
| Parp2.1429  | Parp2  | 11546 | LIB | 1429 |
| Parp2.1677  | Parp2  | 11546 | LIB | 1677 |
| Pax5.154    | Pax5   | 18507 | LIB | 154  |
| Pax5.328    | Pax5   | 18507 | LIB | 328  |
| Pax5.601    | Pax5   | 18507 | LIB | 601  |
| Pax5.852    | Pax5   | 18507 | LIB | 852  |
| Pax5.914    | Pax5   | 18507 | LIB | 914  |
| Paxip1.3203 | Paxip1 | 55982 | LIB | 3203 |
| Paxip1.3451 | Paxip1 | 55982 | LIB | 3451 |
| Paxip1.3562 | Paxip1 | 55982 | LIB | 3562 |
| Paxip1.3670 | Paxip1 | 55982 | LIB | 3670 |
| Pcgf2.507   | Pcgf2  | 22658 | LIB | 507  |
| Pcgf2.690   | Pcgf2  | 22658 | LIB | 690  |
| Pcgf2.801   | Pcgf2  | 22658 | LIB | 801  |
| Pcgf2.982   | Pcgf2  | 22658 | LIB | 982  |
| Pcgf2.1013  | Pcgf2  | 22658 | LIB | 1013 |
| Pcmt1.619   | Pcmt1  | 18537 | LIB | 619  |
| Pcmt1.620   | Pcmt1  | 18537 | LIB | 620  |
| Pcmt1.840   | Pcmt1  | 18537 | LIB | 840  |
| Pcmt1.946   | Pcmt1  | 18537 | LIB | 946  |
| Pcmt1.1259  | Pcmt1  | 18537 | LIB | 1259 |
| Pcna.566    | Pcna   | 18538 | PC  | 566  |



|               |          |           |     |      |
|---------------|----------|-----------|-----|------|
| Pcna.1186     | Pcna     | 18538     | PC  | 1186 |
| Phf1.561      | Phf1     | 21652     | LIB | 561  |
| Phf1.637      | Phf1     | 21652     | LIB | 637  |
| Phf1.1098     | Phf1     | 21652     | LIB | 1098 |
| Phf1.2400     | Phf1     | 21652     | LIB | 2400 |
| Phf2.1851     | Phf2     | 18676     | LIB | 1851 |
| Phf2.3668     | Phf2     | 18676     | LIB | 3668 |
| Phf2.5132     | Phf2     | 18676     | LIB | 5132 |
| Phf2.5166     | Phf2     | 18676     | LIB | 5166 |
| Phf8.1420     | Phf8     | 320595    | LIB | 1420 |
| Phf8.1984     | Phf8     | 320595    | LIB | 1984 |
| Phf8.2131     | Phf8     | 320595    | LIB | 2131 |
| Polr2b.489    | Polr2b   | 231329    | PC  | 489  |
| Polr2b.2176   | Polr2b   | 231329    | PC  | 2176 |
| Ppargc1a.669  | Ppargc1a | 19017     | LIB | 669  |
| Ppargc1a.831  | Ppargc1a | 19017     | LIB | 831  |
| Ppargc1a.1269 | Ppargc1a | 19017     | LIB | 1269 |
| Ppargc1a.1500 | Ppargc1a | 19017     | LIB | 1500 |
| Prdm1.711     | Prdm1    | 12142     | LIB | 711  |
| Prdm1.862     | Prdm1    | 12142     | LIB | 862  |
| Prdm1.919     | Prdm1    | 12142     | LIB | 919  |
| Prdm1.2964    | Prdm1    | 12142     | LIB | 2964 |
| Prdm1.3709    | Prdm1    | 12142     | LIB | 3709 |
| Prdm10.318    | Prdm10   | 382066    | LIB | 318  |
| Prdm10.1130   | Prdm10   | 382066    | LIB | 1130 |
| Prdm10.1348   | Prdm10   | 382066    | LIB | 1348 |
| Prdm10.2613   | Prdm10   | 382066    | LIB | 2613 |
| Prdm11.1844   | Prdm11   | 100042784 | LIB | 1844 |
| Prdm11.2306   | Prdm11   | 100042784 | LIB | 2306 |
| Prdm11.3215   | Prdm11   | 100042784 | LIB | 3215 |
| Prdm11.3216   | Prdm11   | 100042784 | LIB | 3216 |
| Prdm12.481    | Prdm12   | 381359    | LIB | 481  |
| Prdm12.603    | Prdm12   | 381359    | LIB | 603  |

|             |        |        |     |      |
|-------------|--------|--------|-----|------|
| Prdm12.1421 | Prdm12 | 381359 | LIB | 1421 |
| Prdm12.2351 | Prdm12 | 381359 | LIB | 2351 |
| Prdm13.554  | Prdm13 | 230025 | LIB | 554  |
| Prdm13.2613 | Prdm13 | 230025 | LIB | 2613 |
| Prdm13.2702 | Prdm13 | 230025 | LIB | 2702 |
| Prdm13.2828 | Prdm13 | 230025 | LIB | 2828 |
| Prdm13.2936 | Prdm13 | 230025 | LIB | 2936 |
| Prdm14.530  | Prdm14 | 383491 | LIB | 530  |
| Prdm14.1756 | Prdm14 | 383491 | LIB | 1756 |
| Prdm14.1934 | Prdm14 | 383491 | LIB | 1934 |
| Prdm14.2271 | Prdm14 | 383491 | LIB | 2271 |
| Prdm14.2348 | Prdm14 | 383491 | LIB | 2348 |
| Prdm15.958  | Prdm15 | 114604 | LIB | 958  |
| Prdm15.1034 | Prdm15 | 114604 | LIB | 1034 |
| Prdm15.1690 | Prdm15 | 114604 | LIB | 1690 |
| Prdm15.1796 | Prdm15 | 114604 | LIB | 1796 |
| Prdm15.2734 | Prdm15 | 114604 | LIB | 2734 |
| Prdm16.680  | Prdm16 | 70673  | LIB | 680  |
| Prdm16.5683 | Prdm16 | 70673  | LIB | 5683 |
| Prdm16.8212 | Prdm16 | 70673  | LIB | 8212 |
| Prdm16.8363 | Prdm16 | 70673  | LIB | 8363 |
| Prdm16.8571 | Prdm16 | 70673  | LIB | 8571 |
| Prdm2.1020  | Prdm2  | 110593 | LIB | 1020 |
| Prdm2.4191  | Prdm2  | 110593 | LIB | 4191 |
| Prdm2.4655  | Prdm2  | 110593 | LIB | 4655 |
| Prdm2.4956  | Prdm2  | 110593 | LIB | 4956 |
| Prdm2.5781  | Prdm2  | 110593 | LIB | 5781 |
| Prdm4.1943  | Prdm4  | 72843  | LIB | 1943 |
| Prdm4.2535  | Prdm4  | 72843  | LIB | 2535 |
| Prdm4.3139  | Prdm4  | 72843  | LIB | 3139 |
| Prdm4.3391  | Prdm4  | 72843  | LIB | 3391 |
| Prdm4.3667  | Prdm4  | 72843  | LIB | 3667 |
| Prdm5.908   | Prdm5  | 70779  | LIB | 908  |

|             |        |        |     |      |
|-------------|--------|--------|-----|------|
| Prdm5.984   | Prdm5  | 70779  | LIB | 984  |
| Prdm5.1353  | Prdm5  | 70779  | LIB | 1353 |
| Prdm5.2148  | Prdm5  | 70779  | LIB | 2148 |
| Prdm6.1018  | Prdm6  | 225518 | LIB | 1018 |
| Prdm6.1790  | Prdm6  | 225518 | LIB | 1790 |
| Prdm6.1823  | Prdm6  | 225518 | LIB | 1823 |
| Prdm6.1839  | Prdm6  | 225518 | LIB | 1839 |
| Prdm8.2290  | Prdm8  | 77630  | LIB | 2290 |
| Prdm8.3042  | Prdm8  | 77630  | LIB | 3042 |
| Prdm8.3048  | Prdm8  | 77630  | LIB | 3048 |
| Prdm8.3062  | Prdm8  | 77630  | LIB | 3062 |
| Prdm9.77    | Prdm9  | 213389 | LIB | 77   |
| Prdm9.496   | Prdm9  | 213389 | LIB | 496  |
| Prdm9.1838  | Prdm9  | 213389 | LIB | 1838 |
| Prkaa1.145  | Prkaa1 | 105787 | LIB | 145  |
| Prkaa1.1981 | Prkaa1 | 105787 | LIB | 1981 |
| Prkaa1.3080 | Prkaa1 | 105787 | LIB | 3080 |
| Prkaa1.3635 | Prkaa1 | 105787 | LIB | 3635 |
| Prkaa1.3954 | Prkaa1 | 105787 | LIB | 3954 |
| Prkaa1.4596 | Prkaa1 | 105787 | LIB | 4596 |
| Prkaa2.2299 | Prkaa2 | 108079 | LIB | 2299 |
| Prkaa2.2748 | Prkaa2 | 108079 | LIB | 2748 |
| Prkaa2.4825 | Prkaa2 | 108079 | LIB | 4825 |
| Prkaa2.6172 | Prkaa2 | 108079 | LIB | 6172 |
| Prkaa2.6849 | Prkaa2 | 108079 | LIB | 6849 |
| Prkcd.161   | Prkcd  | 18753  | LIB | 161  |
| Prkcd.441   | Prkcd  | 18753  | LIB | 441  |
| Prkcd.707   | Prkcd  | 18753  | LIB | 707  |
| Prkcd.1389  | Prkcd  | 18753  | LIB | 1389 |
| Prmt1.243   | Prmt1  | 15469  | LIB | 243  |
| Prmt1.264   | Prmt1  | 15469  | LIB | 264  |
| Prmt1.630   | Prmt1  | 15469  | LIB | 630  |
| Prmt1.1014  | Prmt1  | 15469  | LIB | 1014 |

|            |       |        |     |      |
|------------|-------|--------|-----|------|
| Prmt2.151  | Prmt2 | 15468  | LIB | 151  |
| Prmt2.154  | Prmt2 | 15468  | LIB | 154  |
| Prmt2.1066 | Prmt2 | 15468  | LIB | 1066 |
| Prmt2.1067 | Prmt2 | 15468  | LIB | 1067 |
| Prmt3.502  | Prmt3 | 71974  | LIB | 502  |
| Prmt3.814  | Prmt3 | 71974  | LIB | 814  |
| Prmt3.838  | Prmt3 | 71974  | LIB | 838  |
| Prmt3.985  | Prmt3 | 71974  | LIB | 985  |
| Prmt3.1839 | Prmt3 | 71974  | LIB | 1839 |
| Prmt5.56   | Prmt5 | 27374  | LIB | 56   |
| Prmt5.266  | Prmt5 | 27374  | LIB | 266  |
| Prmt5.2152 | Prmt5 | 27374  | LIB | 2152 |
| Prmt5.2293 | Prmt5 | 27374  | LIB | 2293 |
| Prmt6.247  | Prmt6 | 99890  | LIB | 247  |
| Prmt6.1493 | Prmt6 | 99890  | LIB | 1493 |
| Prmt6.1983 | Prmt6 | 99890  | LIB | 1983 |
| Prmt6.2355 | Prmt6 | 99890  | LIB | 2355 |
| Prmt7.23   | Prmt7 | 214572 | LIB | 23   |
| Prmt7.45   | Prmt7 | 214572 | LIB | 45   |
| Prmt7.88   | Prmt7 | 214572 | LIB | 88   |
| Prmt7.1284 | Prmt7 | 214572 | LIB | 1284 |
| Prmt7.2135 | Prmt7 | 214572 | LIB | 2135 |
| Prmt8.302  | Prmt8 | 381813 | LIB | 302  |
| Prmt8.455  | Prmt8 | 381813 | LIB | 455  |
| Prmt8.667  | Prmt8 | 381813 | LIB | 667  |
| Prmt8.1854 | Prmt8 | 381813 | LIB | 1854 |
| Psip1.763  | Psip1 | 101739 | LIB | 763  |
| Psip1.1311 | Psip1 | 101739 | LIB | 1311 |
| Psip1.1596 | Psip1 | 101739 | LIB | 1596 |
| Psip1.2474 | Psip1 | 101739 | LIB | 2474 |
| Psip1.2652 | Psip1 | 101739 | LIB | 2652 |
| Rbbp4.2088 | Rbbp4 | 19646  | LIB | 2088 |
| Rbbp4.2174 | Rbbp4 | 19646  | LIB | 2174 |

|             |                    |        |     |      |
|-------------|--------------------|--------|-----|------|
| Rbbp4.2511  | Rbbp4              | 19646  | LIB | 2511 |
| Rbbp4.3753  | Rbbp4              | 19646  | LIB | 3753 |
| Rbbp5.1634  | Rbbp5              | 213464 | LIB | 1634 |
| Rbbp5.2248  | Rbbp5              | 213464 | LIB | 2248 |
| Rbbp5.2655  | Rbbp5              | 213464 | LIB | 2655 |
| Rbbp5.2974  | Rbbp5              | 213464 | LIB | 2974 |
| Renilla.713 | Renilla Luciferase |        | NC  | 713  |
| Ring1.260   | Ring1              | 19763  | LIB | 260  |
| Ring1.669   | Ring1              | 19763  | LIB | 669  |
| Ring1.1034  | Ring1              | 19763  | LIB | 1034 |
| Rnf2.1856   | Rnf2               | 19821  | LIB | 1856 |
| Rnf2.2203   | Rnf2               | 19821  | LIB | 2203 |
| Rnf2.2538   | Rnf2               | 19821  | LIB | 2538 |
| Rnf2.2809   | Rnf2               | 19821  | LIB | 2809 |
| Rnf2.2875   | Rnf2               | 19821  | LIB | 2875 |
| Rnf20.420   | Rnf20              | 109331 | LIB | 420  |
| Rnf20.948   | Rnf20              | 109331 | LIB | 948  |
| Rnf20.1295  | Rnf20              | 109331 | LIB | 1295 |
| Rnf20.3244  | Rnf20              | 109331 | LIB | 3244 |
| Rnf20.3277  | Rnf20              | 109331 | LIB | 3277 |
| Rnf20.3718  | Rnf20              | 109331 | LIB | 3718 |
| Rpa1.1620   | Rpa1               | 68275  | PC  | 1620 |
| Rpa3.276    | Rpa3               | 68240  | PC  | 278  |
| Rpa3.455    | Rpa3               | 68240  | PC  | 457  |
| Rpa3.561    | Rpa3               | 68240  | PC  | 561  |
| Satb1.710   | Satb1              | 20230  | LIB | 710  |
| Satb1.1401  | Satb1              | 20230  | LIB | 1401 |
| Satb1.1478  | Satb1              | 20230  | LIB | 1478 |
| Satb1.1709  | Satb1              | 20230  | LIB | 1709 |
| Satb1.2566  | Satb1              | 20230  | LIB | 2566 |
| Setd1a.119  | Setd1a             | 233904 | LIB | 119  |
| Setd1a.388  | Setd1a             | 233904 | LIB | 388  |
| Setd1a.643  | Setd1a             | 233904 | LIB | 643  |

|             |        |        |     |      |
|-------------|--------|--------|-----|------|
| Setd1a.5859 | Setd1a | 233904 | LIB | 5859 |
| Setd1b.3553 | Setd1b | 208043 | LIB | 3553 |
| Setd1b.3557 | Setd1b | 208043 | LIB | 3557 |
| Setd1b.4520 | Setd1b | 208043 | LIB | 4520 |
| Setd1b.4522 | Setd1b | 208043 | LIB | 4522 |
| Setd1b.4699 | Setd1b | 208043 | LIB | 4699 |
| Setd2.182   | Setd2  | 235626 | LIB | 182  |
| Setd2.1467  | Setd2  | 235626 | LIB | 1467 |
| Setd2.1785  | Setd2  | 235626 | LIB | 1785 |
| Setd2.3632  | Setd2  | 235626 | LIB | 3632 |
| Setd2.4051  | Setd2  | 235626 | LIB | 4051 |
| Setd3.795   | Setd3  | 52690  | LIB | 795  |
| Setd3.1496  | Setd3  | 52690  | LIB | 1496 |
| Setd3.2395  | Setd3  | 52690  | LIB | 2395 |
| Setd4.506   | Setd4  | 224440 | LIB | 506  |
| Setd4.1308  | Setd4  | 224440 | LIB | 1308 |
| Setd4.1517  | Setd4  | 224440 | LIB | 1517 |
| Setd7.4328  | Setd7  | 73251  | LIB | 4328 |
| Setd7.5317  | Setd7  | 73251  | LIB | 5317 |
| Setd7.5342  | Setd7  | 73251  | LIB | 5342 |
| Setd7.5940  | Setd7  | 73251  | LIB | 5940 |
| Setd7.7009  | Setd7  | 73251  | LIB | 7009 |
| Setd8.2578  | Setd8  | 67956  | LIB | 2578 |
| Setd8.2622  | Setd8  | 67956  | LIB | 2622 |
| Setd8.2632  | Setd8  | 67956  | LIB | 2632 |
| Setdb1.1145 | Setdb1 | 84505  | LIB | 1145 |
| Setdb1.1925 | Setdb1 | 84505  | LIB | 1925 |
| Setdb1.2174 | Setdb1 | 84505  | LIB | 2174 |
| Setdb1.3684 | Setdb1 | 84505  | LIB | 3684 |
| Setdb2.809  | Setdb2 | 239122 | LIB | 809  |
| Setdb2.810  | Setdb2 | 239122 | LIB | 810  |
| Setdb2.990  | Setdb2 | 239122 | LIB | 990  |
| Setdb2.1417 | Setdb2 | 239122 | LIB | 1417 |

|             |        |        |     |      |
|-------------|--------|--------|-----|------|
| Setmar.1193 | Setmar | 74729  | LIB | 1193 |
| Setmar.1195 | Setmar | 74729  | LIB | 1195 |
| Setmar.1589 | Setmar | 74729  | LIB | 1589 |
| Sfmbt1.868  | Sfmbt1 | 54650  | LIB | 868  |
| Sfmbt1.1345 | Sfmbt1 | 54650  | LIB | 1345 |
| Sfmbt1.1802 | Sfmbt1 | 54650  | LIB | 1802 |
| Sfmbt1.2018 | Sfmbt1 | 54650  | LIB | 2018 |
| Sfmbt1.2421 | Sfmbt1 | 54650  | LIB | 2421 |
| Sfmbt2.602  | Sfmbt2 | 353282 | LIB | 602  |
| Sfmbt2.3592 | Sfmbt2 | 353282 | LIB | 3592 |
| Sfmbt2.5673 | Sfmbt2 | 353282 | LIB | 5673 |
| Sin3a.531   | Sin3a  | 20466  | LIB | 531  |
| Sin3a.3537  | Sin3a  | 20466  | LIB | 3537 |
| Sin3a.3559  | Sin3a  | 20466  | LIB | 3559 |
| Sin3a.4729  | Sin3a  | 20466  | LIB | 4729 |
| Sin3b.188   | Sin3b  | 20467  | LIB | 188  |
| Sin3b.326   | Sin3b  | 20467  | LIB | 326  |
| Sin3b.338   | Sin3b  | 20467  | LIB | 338  |
| Sin3b.381   | Sin3b  | 20467  | LIB | 381  |
| Sin3b.475   | Sin3b  | 20467  | LIB | 475  |
| Sirt1.688   | Sirt1  | 93759  | LIB | 688  |
| Sirt1.1708  | Sirt1  | 93759  | LIB | 1708 |
| Sirt1.1779  | Sirt1  | 93759  | LIB | 1779 |
| Sirt1.2191  | Sirt1  | 93759  | LIB | 2191 |
| Sirt2.735   | Sirt2  | 64383  | LIB | 735  |
| Sirt2.1418  | Sirt2  | 64383  | LIB | 1418 |
| Sirt2.1460  | Sirt2  | 64383  | LIB | 1460 |
| Sirt2.1600  | Sirt2  | 64383  | LIB | 1600 |
| Sirt3.462   | Sirt3  | 64384  | LIB | 462  |
| Sirt3.869   | Sirt3  | 64384  | LIB | 869  |
| Sirt3.993   | Sirt3  | 64384  | LIB | 993  |
| Sirt3.1002  | Sirt3  | 64384  | LIB | 1002 |
| Sirt3.1236  | Sirt3  | 64384  | LIB | 1236 |

|              |         |        |     |      |
|--------------|---------|--------|-----|------|
| Sirt4.105    | Sirt4   | 75387  | LIB | 105  |
| Sirt4.633    | Sirt4   | 75387  | LIB | 633  |
| Sirt4.1490   | Sirt4   | 75387  | LIB | 1490 |
| Sirt4.1806   | Sirt4   | 75387  | LIB | 1806 |
| Sirt5.586    | Sirt5   | 68346  | LIB | 586  |
| Sirt5.1032   | Sirt5   | 68346  | LIB | 1032 |
| Sirt5.1219   | Sirt5   | 68346  | LIB | 1219 |
| Sirt5.1290   | Sirt5   | 68346  | LIB | 1290 |
| Sirt6.83     | Sirt6   | 50721  | LIB | 83   |
| Sirt6.421    | Sirt6   | 50721  | LIB | 421  |
| Sirt6.937    | Sirt6   | 50721  | LIB | 937  |
| Sirt6.1609   | Sirt6   | 50721  | LIB | 1609 |
| Sirt7.841    | Sirt7   | 209011 | LIB | 841  |
| Sirt7.844    | Sirt7   | 209011 | LIB | 844  |
| Sirt7.1238   | Sirt7   | 209011 | LIB | 1238 |
| Sirt7.1604   | Sirt7   | 209011 | LIB | 1604 |
| Sirt7.1677   | Sirt7   | 209011 | LIB | 1677 |
| Smarca1.1401 | Smarca1 | 93761  | LIB | 1401 |
| Smarca1.1430 | Smarca1 | 93761  | LIB | 1430 |
| Smarca1.1613 | Smarca1 | 93761  | LIB | 1613 |
| Smarca1.1893 | Smarca1 | 93761  | LIB | 1893 |
| Smarca1.3418 | Smarca1 | 93761  | LIB | 3418 |
| Smarca2.263  | Smarca2 | 67155  | LIB | 263  |
| Smarca2.274  | Smarca2 | 67155  | LIB | 274  |
| Smarca2.712  | Smarca2 | 67155  | LIB | 712  |
| Smarca2.1061 | Smarca2 | 67155  | LIB | 1061 |
| Smarca4.3232 | Smarca4 | 20586  | LIB | 3232 |
| Smarca4.3364 | Smarca4 | 20586  | LIB | 3364 |
| Smarca4.3633 | Smarca4 | 20586  | LIB | 3633 |
| Smarca4.4935 | Smarca4 | 20586  | LIB | 4935 |
| Smarca4.5466 | Smarca4 | 20586  | LIB | 5466 |
| Smarca5.1139 | Smarca5 | 93762  | LIB | 1139 |
| Smarca5.1264 | Smarca5 | 93762  | LIB | 1264 |



|              |         |        |     |      |
|--------------|---------|--------|-----|------|
| Smarca5.3886 | Smarca5 | 93762  | LIB | 3886 |
| Smarca5.4421 | Smarca5 | 93762  | LIB | 4421 |
| Smarca5.4522 | Smarca5 | 93762  | LIB | 4522 |
| Smarcc2.1398 | Smarcc2 | 68094  | LIB | 1398 |
| Smarcc2.1941 | Smarcc2 | 68094  | LIB | 1941 |
| Smarcc2.2235 | Smarcc2 | 68094  | LIB | 2235 |
| Smarcc2.2541 | Smarcc2 | 68094  | LIB | 2541 |
| Smarcd1.690  | Smarcd1 | 83797  | LIB | 690  |
| Smarcd1.986  | Smarcd1 | 83797  | LIB | 986  |
| Smarcd1.1738 | Smarcd1 | 83797  | LIB | 1738 |
| Smarcd1.1858 | Smarcd1 | 83797  | LIB | 1858 |
| Smarcd3.518  | Smarcd3 | 66993  | LIB | 518  |
| Smarcd3.847  | Smarcd3 | 66993  | LIB | 847  |
| Smarcd3.1323 | Smarcd3 | 66993  | LIB | 1323 |
| Smarcd3.1591 | Smarcd3 | 66993  | LIB | 1591 |
| Smarcd3.1708 | Smarcd3 | 66993  | LIB | 1708 |
| Smarce1.2096 | Smarce1 | 57376  | LIB | 2096 |
| Smarce1.2121 | Smarce1 | 57376  | LIB | 2121 |
| Smarce1.2154 | Smarce1 | 57376  | LIB | 2154 |
| Smarce1.2337 | Smarce1 | 57376  | LIB | 2337 |
| Smarce1.2593 | Smarce1 | 57376  | LIB | 2593 |
| Smyd1.1302   | Smyd1   | 12180  | LIB | 1302 |
| Smyd1.1635   | Smyd1   | 12180  | LIB | 1635 |
| Smyd1.1658   | Smyd1   | 12180  | LIB | 1658 |
| Smyd2.334    | Smyd2   | 226830 | LIB | 334  |
| Smyd2.640    | Smyd2   | 226830 | LIB | 640  |
| Smyd2.1421   | Smyd2   | 226830 | LIB | 1421 |
| Smyd2.1476   | Smyd2   | 226830 | LIB | 1476 |
| Smyd3.306    | Smyd3   | 69726  | LIB | 306  |
| Smyd3.438    | Smyd3   | 69726  | LIB | 438  |
| Smyd3.980    | Smyd3   | 69726  | LIB | 980  |
| Smyd3.1506   | Smyd3   | 69726  | LIB | 1506 |
| Smyd3.2607   | Smyd3   | 69726  | LIB | 2607 |

|               |          |           |     |       |
|---------------|----------|-----------|-----|-------|
| Smyd4.693     | Smyd4    | 319822    | LIB | 693   |
| Smyd4.2959    | Smyd4    | 319822    | LIB | 2959  |
| Smyd4.3333    | Smyd4    | 319822    | LIB | 3333  |
| Smyd4.3414    | Smyd4    | 319822    | LIB | 3414  |
| Smyd4.3439    | Smyd4    | 319822    | LIB | 3439  |
| Smyd5.1548    | Smyd5    | 232187    | LIB | 1548  |
| Smyd5.1643    | Smyd5    | 232187    | LIB | 1643  |
| Smyd5.2044    | Smyd5    | 232187    | LIB | 2044  |
| Smyd5.2048    | Smyd5    | 232187    | LIB | 2048  |
| Srcap.2697    | Srcap    | 100043597 | LIB | 2697  |
| Srcap.3130    | Srcap    | 100043597 | LIB | 3130  |
| Srcap.5342    | Srcap    | 100043597 | LIB | 5342  |
| Srcap.7360    | Srcap    | 100043597 | LIB | 7360  |
| Srcap.11381   | Srcap    | 100043597 | LIB | 11381 |
| Ssrp1.306     | Ssrp1    | 20833     | LIB | 306   |
| Ssrp1.577     | Ssrp1    | 20833     | LIB | 577   |
| Ssrp1.897     | Ssrp1    | 20833     | LIB | 897   |
| Ssrp1.975     | Ssrp1    | 20833     | LIB | 975   |
| Ssrp1.2237    | Ssrp1    | 20833     | LIB | 2237  |
| Supt16h.1672  | Supt16h  | 114741    | LIB | 1672  |
| Supt16h.2037  | Supt16h  | 114741    | LIB | 2037  |
| Supt16h.2827  | Supt16h  | 114741    | LIB | 2827  |
| Supt16h.2999  | Supt16h  | 114741    | LIB | 2999  |
| Suv39h1.496   | Suv39h1  | 20937     | LIB | 496   |
| Suv39h1.1016  | Suv39h1  | 20937     | LIB | 1016  |
| Suv39h1.1202  | Suv39h1  | 20937     | LIB | 1202  |
| Suv39h1.1471  | Suv39h1  | 20937     | LIB | 1471  |
| Suv39h1.1827  | Suv39h1  | 20937     | LIB | 1827  |
| Suv39h2.1395  | Suv39h2  | 64707     | LIB | 1395  |
| Suv39h2.1871  | Suv39h2  | 64707     | LIB | 1871  |
| Suv39h2.2981  | Suv39h2  | 64707     | LIB | 2981  |
| Suv39h2.4184  | Suv39h2  | 64707     | LIB | 4184  |
| Suv420h1.1112 | Suv420h1 | 225888    | LIB | 1112  |

|               |          |        |     |      |
|---------------|----------|--------|-----|------|
| Suv420h1.1327 | Suv420h1 | 225888 | LIB | 1327 |
| Suv420h1.3263 | Suv420h1 | 225888 | LIB | 3263 |
| Suv420h1.3357 | Suv420h1 | 225888 | LIB | 3357 |
| Suv420h2.287  | Suv420h2 | 232811 | LIB | 287  |
| Suv420h2.686  | Suv420h2 | 232811 | LIB | 686  |
| Suv420h2.825  | Suv420h2 | 232811 | LIB | 825  |
| Suz12.909     | Suz12    | 52615  | LIB | 909  |
| Suz12.1676    | Suz12    | 52615  | LIB | 1676 |
| Suz12.1842    | Suz12    | 52615  | LIB | 1842 |
| Suz12.3979    | Suz12    | 52615  | LIB | 3979 |
| Suz12.4300    | Suz12    | 52615  | LIB | 4300 |
| Taf1.928      | Taf1     | 270627 | LIB | 928  |
| Taf1.3994     | Taf1     | 270627 | LIB | 3994 |
| Taf1.5030     | Taf1     | 270627 | LIB | 5030 |
| Taf1.7786     | Taf1     | 270627 | LIB | 7786 |
| Taf3.1009     | Taf3     | 209361 | LIB | 1009 |
| Taf3.1315     | Taf3     | 209361 | LIB | 1315 |
| Taf3.1769     | Taf3     | 209361 | LIB | 1769 |
| Taf3.2951     | Taf3     | 209361 | LIB | 2951 |
| Taf3.3182     | Taf3     | 209361 | LIB | 3182 |
| Ube2a.142     | Ube2a    | 22209  | LIB | 142  |
| Ube2a.786     | Ube2a    | 22209  | LIB | 786  |
| Ube2a.1206    | Ube2a    | 22209  | LIB | 1206 |
| Ube2a.1411    | Ube2a    | 22209  | LIB | 1411 |
| Ube2b.776     | Ube2b    | 22210  | LIB | 776  |
| Ube2b.1626    | Ube2b    | 22210  | LIB | 1626 |
| Ube2b.1661    | Ube2b    | 22210  | LIB | 1661 |
| Ube2b.2075    | Ube2b    | 22210  | LIB | 2075 |
| Ube2b.2079    | Ube2b    | 22210  | LIB | 2079 |
| Ube2e1.228    | Ube2e1   | 22194  | LIB | 228  |
| Ube2e1.858    | Ube2e1   | 22194  | LIB | 858  |
| Ube2e1.1041   | Ube2e1   | 22194  | LIB | 1041 |
| Ube2e1.1126   | Ube2e1   | 22194  | LIB | 1126 |

|             |        |        |     |      |
|-------------|--------|--------|-----|------|
| Ube2e1.1207 | Ube2e1 | 22194  | LIB | 1207 |
| Ube2e1.1357 | Ube2e1 | 22194  | LIB | 1357 |
| Ube2i.40    | Ube2i  | 22196  | LIB | 40   |
| Ube2i.2212  | Ube2i  | 22196  | LIB | 2212 |
| Ube2i.2447  | Ube2i  | 22196  | LIB | 2447 |
| Ube2i.2498  | Ube2i  | 22196  | LIB | 2498 |
| Usp22.1429  | Usp22  | 216825 | LIB | 1429 |
| Usp22.2382  | Usp22  | 216825 | LIB | 2382 |
| Usp22.2760  | Usp22  | 216825 | LIB | 2760 |
| Usp22.3603  | Usp22  | 216825 | LIB | 3603 |
| Usp27x.1408 | Usp27x | 54651  | LIB | 1408 |
| Usp27x.2829 | Usp27x | 54651  | LIB | 2829 |
| Usp27x.2922 | Usp27x | 54651  | LIB | 2922 |
| Usp27x.3592 | Usp27x | 54651  | LIB | 3592 |
| Usp27x.3593 | Usp27x | 54651  | LIB | 3593 |
| Usp51.737   | Usp51  | 635253 | LIB | 737  |
| Usp51.1997  | Usp51  | 635253 | LIB | 1997 |
| Usp51.2109  | Usp51  | 635253 | LIB | 2109 |
| Usp51.2114  | Usp51  | 635253 | LIB | 2114 |
| Usp51.2194  | Usp51  | 635253 | LIB | 2194 |
| Utx.652     | Utx    | 22289  | LIB | 652  |
| Utx.888     | Utx    | 22289  | LIB | 888  |
| Utx.1445    | Utx    | 22289  | LIB | 1445 |
| Utx.4317    | Utx    | 22289  | LIB | 4317 |
| Utx.4510    | Utx    | 22289  | LIB | 4510 |
| Wbp7.2972   | Wbp7   | 75410  | LIB | 2972 |
| Wbp7.3029   | Wbp7   | 75410  | LIB | 3029 |
| Wbp7.5587   | Wbp7   | 75410  | LIB | 5587 |
| Wbp7.6965   | Wbp7   | 75410  | LIB | 6965 |
| Wdr5.501    | Wdr5   | 140858 | LIB | 501  |
| Wdr5.502    | Wdr5   | 140858 | LIB | 502  |
| Wdr5.1321   | Wdr5   | 140858 | LIB | 1321 |
| Wdr5.1765   | Wdr5   | 140858 | LIB | 1765 |

|              |         |        |     |      |
|--------------|---------|--------|-----|------|
| Wdr5.2837    | Wdr5    | 140858 | LIB | 2837 |
| Wdr82.1889   | Wdr82   | 77305  | LIB | 1889 |
| Wdr82.3590   | Wdr82   | 77305  | LIB | 3590 |
| Wdr82.3705   | Wdr82   | 77305  | LIB | 3705 |
| Wdr82.4023   | Wdr82   | 77305  | LIB | 4023 |
| Whsc1.812    | Whsc1   | 107823 | LIB | 812  |
| Whsc1.818    | Whsc1   | 107823 | LIB | 818  |
| Whsc1.3055   | Whsc1   | 107823 | LIB | 3055 |
| Whsc1.3056   | Whsc1   | 107823 | LIB | 3056 |
| Whsc1I1.276  | Whsc1I1 | 234135 | LIB | 276  |
| Whsc1I1.373  | Whsc1I1 | 234135 | LIB | 373  |
| Whsc1I1.524  | Whsc1I1 | 234135 | LIB | 524  |
| Whsc1I1.1307 | Whsc1I1 | 234135 | LIB | 1307 |
| Whsc1I1.1653 | Whsc1I1 | 234135 | LIB | 1653 |
| Wnt5a.2013   | Wnt5a   | 22418  | LIB | 2013 |
| Wnt5a.2659   | Wnt5a   | 22418  | LIB | 2659 |
| Wnt5a.2764   | Wnt5a   | 22418  | LIB | 2764 |
| Wnt5a.4154   | Wnt5a   | 22418  | LIB | 4154 |

**22nt-shRNA guide**

TTCTCCATAGAGATACCCAGC

TGTCATGATACTGTAGTCCCAG

TCAATGATCTCTGTGGCCGGG

TTTACCTGAATCAATACTGAGG

TTCTAGAGTACCAAACCAGTGC

TTACTAGCCGAGACAGAGGGAC

TAGTTTCTTATGGCGCTTCATG

TAGATTTAGCACATCCAGCTCA

TTTGCTGTAGGTATGATCCAGG

TTACACATGTAGTTATGCCAGG

TTTCATAATGCACAGTGGGCAT

TAGAGGGATCAAACAGGCCCTC

TTGCGTTCCATGGTGCTGTTGC

TAGGACGGTGTAAATCACAGCTC

TTTCCGAACACCTGGACCTTGG

TAGGTCGCCTGCTTCCTGGGAA

TTGGTGTCAGGGTAAGACCAGA

TTTGGTGTCAGGGTAAGACCAG

TTTGGTTCCATAGTGATTCTCG

TCCATGATTAGCAAGGTCCCGT

TTGTCTGGAGTGGTATTCCTTG

TTGCTTAATGATAACCTTGATT

TTCAGTTTAATGTCCAAGCCTT

TAAATAAAGGTTTACTTGTGG

TTAAATCATAGTCATTTCCAGA

TTTATGGAGCTGTACTIONTCCAAA

TTATTAATGAATACGGCTGTAG

TTATTAACCAATCCCATTGCTG

TTTGAGACTGTTTAGGACGGTA

TTAATGTGAGATAAGAGTCTGT

ATAATTACCAATACTGCCCTTC

ACCAATATTACTAAGATCCTGA

|                         |
|-------------------------|
| TTTGTTAAATGGATGTTCCAAA  |
| TGTAGGGCTAACAAGACTCGTT  |
| TTGGAGGTTACCTAAGGGCTGG  |
| TATAGTTTATAGAACCCACTAG  |
| TTAATGTCTGCGAGGGTCCTGG  |
| TTGTAGAGTGCCTCTATCCTGG  |
| TTTGGAATCTATTCTTCCAGA   |
| TACAGATTTAAGATCAACCATT  |
| TATGATATCAAGATCAGCAGGG  |
| TTATACTTCATACAGAAACAGT  |
| TTACTGTACAAGCAGCTTCTGT  |
| TTTGTCACCAATTCAGTCCTAT  |
| TTGTATTTCTTACTGGTCCTTC  |
| TTAAATGGAAATTAGTTGGGTA  |
| TATAAGATGAATGTTTCGTCTTC |
| TTATTGACTATCCAAGGGCTAC  |
| TAATTCTATAGGCACAACCAAT  |
| TAAATTATAGTAGAAATGCCGT  |
| TAAGAAATTAAGATGCTCGTGA  |
| TTGCTTGTTATCAACCTGGGTC  |
| TAATTGCTTGTTATCAACCTGG  |
| TTGAGTGCTAGACTCATGGTTT  |
| TTTAAGAGTATCGTAGACCTTG  |
| TTGTCTTCGAAGATCCTTCAGT  |
| TAACTGGAGAATTTCACTGTTT  |
| TAGATTATTGAGGACTTCGTGA  |
| TATTCACTTAAGTAATTCCTGT  |
| TTTGTCACATAAACCTTCCTGA  |
| TAAAGTTCGAATGAGAGCCGAT  |
| TTCTGCATAAACCTCTTGCTGA  |
| TTGTATTTCTTCATTACTGCGT  |
| TTCAATGTCAAGAACATGGGTC  |
| TTTACCTTTATGATTCATCTGT  |

|                         |
|-------------------------|
| TTCCCTTGATAAAGTTAACCATG |
| TTTACTTTCATCTAGCTTCAGA  |
| TTGATTAATAAGGTCCCTCCAGC |
| TTGCTTTGTCAATACATCGTTG  |
| TTGTTCTGGGATCCTTGCGAGG  |
| TTGAGTGCCACGATGAAACGGC  |
| TATGTCTCTGTGAATTACCTTC  |
| TTCTCCGGCTTTATGTCTCTGT  |
| TTGAGTTCTAGGTTCTGGGAA   |
| TTCAACATTTGACAAATTGAAA  |
| TAATCTTCAATGAAATCCCTAG  |
| TTATACATTGCTTAACTGCAGT  |
| TAAATTGAGAAATATAGTGCAGG |
| TTACATTCAAAC TACCATCGGC |
| TTTCTTTGTCACTTGACGGAGA  |
| TTCACTTTGGAGTTCCGCTTC   |
| TTATAACAATATCACTGCGGAAA |
| TTTATTACAAGTCTACCCTTTA  |
| TAATTTGTATACAATATCTTGA  |
| TTTACTTTCCGATCCAATCTGC  |
| TTCCTTAACAGTCCTAACCAGA  |
| TTAATTGAGATTAACAAACTAT  |
| TTAAACACTATATTTGCCTTGG  |
| TTAAATTTGAAATTACACTTGT  |
| TTGATGGCATGTACCATTGAG   |
| TTAGCTGAAGAGTCGAATGGTG  |
| TGTATCAATACCACCTTCCCTT  |
| TTCCGTTACATCCATATGCTGC  |
| TAAATTGTGGAATCCTCCGTTT  |
| TTGAGTTGAAGACTGTACCTGG  |
| TTGCAGATGCAATATAGCCTGG  |
| TAAATAATTGTCATTATGCTAA  |
| TAAGTTGGAAGAAACAATGGGA  |



|                         |
|-------------------------|
| TTCAAGTGAGACATCACCCCTAT |
| TTGGCAATGATTACCTTCGGGG  |
| TTTGGCAATGATTACCTTCGGG  |
| TAATGTGATCCAAATAATCTGG  |
| TTAAATAAGCGGTACTCTGTGT  |
| TCCATCTTTGAAATCCTCTTGA  |
| TTATAAATGTAAACAGTTGGTAA |
| TTTCTTAGATTTCTTGGGCTGA  |
| TAATAGTGTAGGGCTTCGGGG   |
| TTGGTTAGTCTTCGCCGGGC    |
| TTTATGATAATCAGGCAGGTTT  |
| TAACAGTTTGTAACATGGTGT   |
| TATTTCTTACAGTCACAGCTTA  |
| TAATCTTATAGTAATCAGGGAG  |
| TATTGTTCCCATATCCATGGGT  |
| TAACAATTTGTAACATAGTGT   |
| TCTAGTTTAGACTTGATTGTGC  |
| TTTGTTGATATCTAGACTTAGC  |
| TTGAAGAGCATGTAGCCCATGG  |
| TTGAATGGGATTTCTATCCTGT  |
| AATACTGATGTCATAGCTCTGT  |
| TGAGATTATAGGTGCTTCCTGT  |
| TTAGCTAAGGGAATCAGGTTGT  |
| TAGGCACAAGATTGAGCCTAC   |
| TAAATGCTCAAATATTACTATA  |
| AAATATAGAATGATGTGCCAGT  |
| TACGAAATATAGAATGATGTGC  |
| TTGGTGACAACATATGCTGATG  |
| TTACTTGCAAAGCATAGAGTGT  |
| TTCAACTTTGGGACTGACGTAA  |
| TTGTAGATTTCAACTTTGGGAC  |
| TTTGTGACATAGACCACTGGGG  |
| TTATTTATCGGTAAACACGAGA  |

|                         |
|-------------------------|
| TTACTTGCTCAAAGGAATCAGT  |
| TTAATCTGAAAGGTTATGGTTT  |
| TATTACTTAGTCTAATTCCATT  |
| TTGGATGACATTCTGATACTAC  |
| TAAAGTAAATATACAGTTGGAT  |
| TATATTCCCAAAGAAGGGCTTG  |
| TATTCCTTGAAAGTGACGGTAA  |
| TTAATATTTACATTCAAGCAGG  |
| TAAGCCACAATGCTCATGGGAC  |
| TTATATGCATACGCTATCCAAA  |
| TTTAATAACAAATTGATACCAC  |
| TAATGTTGATGGATCACCCAGT  |
| TTGATGTATGCTAAAGTGGTAG  |
| TATAATGATCAACTCATCCCAT  |
| TTAATGATCACAATCAGTTGAC  |
| TAGAATGACATAATGTCTGTTT  |
| TTCCCTTTCTAAGCCCTACCAAG |
| TAATACGTTCTTAAATAGCTCT  |
| TGTCACAACAGACTCACCCGTG  |
| TTTGACTTGGTAATTAGGCAAA  |
| TTCATAGTAAAGACCCACGGCA  |
| TTAGAAGTCATCCTGCCCTTGT  |
| TTTAGAAGTCATCCTGCCCTTG  |
| TAGTGTTTAGAAGTCATCCTGC  |
| TTGTACAGGCATTTAGTCCCAT  |
| TTACCAGATGAGAACCACGTGG  |
| TTCACGAGATATTCATGCGTC   |
| TTAAAGAATCCTTGGTCCGTGT  |
| TTTCTCTTAAATAACATATTTA  |
| TGTATTAACCTCTTCACTGGGA  |
| TCTCTGTGCAGTTTGTCTCTGC  |
| TTCAAGTCGGAACCTCGTGCAGT |
| TTCCACAACAGAATGACGGCAT  |

|                         |
|-------------------------|
| TTTACTGACATCCCATATGATA  |
| TTTCTGGGTATTATAGATCCGC  |
| TTTCTGGAGAACACATAAGTGG  |
| AAATGTGCAATAGCCATCCGTG  |
| TTGACTTAGATCTATTCTGAGG  |
| TTAAATACTGTATGTCTCCTGG  |
| TTTAATGAGGTAGCAATGGTTA  |
| TTGAATAACAAGATGATCCAAA  |
| TTCAGGATTGGAATATTCCTTC  |
| TTCTTGGTTCAGCTGATCGTAC  |
| TTTCCGGATAAGTCGTTCCGTA  |
| AATATGACCAAAGATAGCCTTG  |
| TAACATTAATCGTGATGGTTC   |
| TTCCGGGAATAATTCATCCCAG  |
| TTATAAGCCTTGATGAACCTTC  |
| ATAATTTGTAACCTCTACCAAC  |
| TTACTGTTTAGTCAACAGGTTT  |
| TTCGTTTCCGACCTGGTCCAGT  |
| TTAAGGTCCATCATGATGTTAA  |
| TTCATGTTCTGCACATCCGTGT  |
| TAGAAGTTCCTAAAGGCCGGGC  |
| TAATTTATATGTACAACCGATA  |
| ATAATTTATATGTACAACCGAT  |
| TAAATAGTGAACGTGGCCCTTC  |
| TTTCAGGTTCTTAAGCATCTTC  |
| TACGTTTCATATTTATAACCTTC |
| TTAGACATTGAGCCTGTCTTGG  |
| TTGTTTATCGTCCTTCAGCTTC  |
| TTGTAGTCGATCTTGTAGCTAT  |
| TTTAGGATCATGTATCTCGGGT  |
| TTTATCAAGACAAACATGTTTG  |
| TTATGGGATGTCAATTCCTAG   |
| TTCAATACGGTATAGAGTCTTT  |

|                         |
|-------------------------|
| TATAGTTTAGAATTGCTCTGGT  |
| ATAATTTATAACCCAAACGTAT  |
| TGTA CTGTTAACTAATCCCTGA |
| TTACTCATTGCTTTCATGGGTG  |
| TTGGTTTATATTCAGGATCTTC  |
| TTGTGGGTGATGAAGGACCTGC  |
| TTTATCATTACTCTGTCCTTGG  |
| TTGTCCTCCAGTATTACTGGGG  |
| TTTCGTAGCTCCATCATTGTGT  |
| TAAGTTATTCTTACTATTCAGC  |
| TTTCTTTGAGCTTAAAGGCTGC  |
| TTATTGATGACAGGGATCCGGG  |
| TGAGTTGCTATAATTACCCTGA  |
| TAACTTATCAATGAGGACCAGT  |
| TTGATCTGTAAATTATAGGTGT  |
| TTAATGACAAGATCTAAGTTT   |
| TTCATTACTAAGGAATGTGGGT  |
| TATAGTAACACGATTTGCCTTT  |
| TTTGTTGGAGTTTATTACCTGT  |
| TTTAAGGTCAATTCTAATGTGC  |
| TTTATTAGTGCTACATCCCTAA  |
| TTGAAGTTAGCATTCATGCAGA  |
| TTTCTTAGCATAGGCAACCAGG  |
| TAAATGATAGTATTCATCCCTG  |
| TTTGATGGTAGAAAGGTCCATA  |
| TAAGATATGTATACACGCCTTG  |
| TCTTATTTGAATCTGTTCCCTC  |
| TTGCTGTACCATGTCACCCTGA  |
| TACATGTTTATCTTAGCCCTTA  |
| TTACATGTTTATCTTAGCCCTT  |
| TAACATTACATGTTTATCTTAG  |
| TTTAGCGGCAACAAATAGGTC   |
| TTGATGTCCGGTTTGCGACAGA  |

|                         |
|-------------------------|
| TTACAATATGTCTTGCTCTGAG  |
| ATAATGGCGATTACACTGGCGC  |
| TGTGCGTACATTACGTTCTGC   |
| TGCACCGTCTTATTGAACCTGG  |
| TAGGTGGTCAGTCTCTGCCTTA  |
| TCAATGATGGTATCCTTGGTGG  |
| ATCAATGATGGTATCCTTGGTG  |
| TAAACAGCTCTATTTACACCATA |
| TATTTGAGTCTGCCATTTCTGC  |
| TTTGATTTCCGCCTCAATGATA  |
| TTTGGTGAGTTGATCTTCGGGA  |
| TTTCACATCATGAAAGGTGTAC  |
| TTAATCTCCAGGCCAATGGCTT  |
| TTCATTACTGCAATTACCTTGG  |
| TTAGACTCAAGAAATCGCGAGA  |
| TATGAGAGGAATTAGCACCAGC  |
| TTAATATTTCTTCAACAGCTAT  |
| TTGTTTCCTGTCGTGAGGCTGG  |
| TTTGGCATTAGAATATCAGAGC  |
| TTTATCATCCTGATACTCTGTG  |
| TTTGCGGGCAGGATTGACGTTA  |
| ATGTCTTCAATGCTCCGTCCGT  |
| TAGTACTTTATCAATATTTCTA  |
| TTGTCTCTTGGTCATCCTCAGT  |
| TCTTATGGTGATTCATTTCTAA  |
| TCTAGGAAAGACTTTCATCTTA  |
| TAGTTGTTAAGCTTCTCCGGGT  |
| TTCACAAATATAACTCGTGT    |
| TTGATGTTGCTGACCATGGAGT  |
| TTGTTACCCATGAAGGCCGAGA  |
| CAAGATTTCAATTGTTCTGTGT  |
| TTCACCTTCCGTGTTCTGAGG   |
| ATCAAGTTCACCTTCCGTGTTT  |

|                         |
|-------------------------|
| TTTGCTATGGATCTGGGCAGGT  |
| ATTTGCTATGGATCTGGGCAGG  |
| TTGTGTTTCATTTTCGCTTCGGC |
| TTTGACAGCAGTTATGGGTTGA  |
| TTGTTTGACAGCAGTTATGGGT  |
| TTTCACTTTACAAGGTTTGCTT  |
| TTATGATCTTCCTTGAGGCTGT  |
| TTATAATGCCTCTAGATCCAGC  |
| TAACCGTAAAGCATGATCTTTA  |
| TTGGAAAGTATCAAATCGCCTA  |
| TAGCAAGATACATTACTTCTAT  |
| TAAACTGTCACAGAACTGCGGT  |
| TTCTACTTGGTTTCCAGCCTGT  |
| TAACTTCATAATATCCCGGAGC  |
| TTCTTAGACACATAGTACCTGT  |
| TTAATTGAGATTAACAACTGG   |
| TAAATTTGAAATTACACTTGTG  |
| TTTAAATTCAATATGTTTGCTC  |
| TTTCATGCAGCAATCCTGCTTG  |
| TTATTTAAGAAATATCCATTGC  |
| TATAGGTTCCCATTCCTTCGTTT |
| TTAAACATCTCAATCACCGTCC  |
| TTGCACTCGAAGATCAAGGGTG  |
| TTCTCCAGGATTATATCTCCTG  |
| TAACAGCATAAGGATCACCTTC  |
| TTATCTACGGCATTGATGTTGG  |
| ATCCTTGTTATCTAAATCGAAG  |
| TTAATGAATCGGCTGATGTTGC  |
| TTTCATCTTATTTAGATCGACG  |
| TTAGGAATCAAGATCTTTCGAT  |
| TAGCTTAGGAATCAAGATCTTT  |
| TATTGTTTGAAGTATGGCCTGA  |
| TATTTATCAAACCTAATCCAGG  |

|                        |
|------------------------|
| TTTCTTGTTCAAATACTTCAGA |
| TTTAGTGTTATAACAAGTGATG |
| TTGTAATCTATTATCCCTCAGG |
| TATTTATAAGTAATCAACCTTA |
| TTTAAGGAAGACGTAGTGCTGA |
| TTATTTAAGGAAGACGTAGTGC |
| TAGAATCATTACAGCTCCTGA  |
| TCAATTGCTGACATTTGCGGGT |
| TTCTTCGTAGTCATCCTCCGGG |
| TTATAATGTACCTCTGTTCTGC |
| TGACTTTATAATGTACCTCTGT |
| TTACTGGCAATTAAGCCGCAGG |
| TTTACTGGCAATTAAGCCGCAG |
| TTCAATGAAAGTGCCATCCTGA |
| TTATTGGTGTTTGACACCGAGA |
| TTGATAGTTGTAAACATGGTTA |
| TTCAAGTTGAACAGAAAGCTGC |
| TTAGCAAAGATGCCTATCCTGT |
| TAATCTTAAGGCATCCAGGGTG |
| TTTGTTTCCCGGTCTTGCCGGC |
| TCTTGGTATAAATTAGACCTAT |
| TTATTCTACCTGATTCTTGGTA |
| TATTTCTGTGTATTAACCCAGT |
| TTATGCAGTATACATAGCGCTC |
| TATTACACAAATATCTCCATT  |
| TTATTACACAAATATCTCCAT  |
| TTAACATCTTCAATCCAGCGGA |
| TTTGTTCCCTGAACCCTTGTTG |
| TAACACTTCAGTACAGATGAAT |
| TAGGTGTCTATACAAAGGGTGG |
| TTAACACTTGACAATATACTTC |
| TAAGTTAACCCATCGCTTGTGC |
| TTCTAAGTTAACCCATCGCTTG |

|                        |
|------------------------|
| TTTCTAGACTTGATAGGACAGT |
| ATGTGTAAGACATCTCCCTTTC |
| TACAGTTCTGGTCCCTGACGGG |
| TTAAACAGTCTGGTCCCTGATG |
| TTCAAATAAATCCTCACCTTTG |
| TTTCCGTTTGATTCTACGGATA |
| TTTCTCATTGGCACTGTCCAGT |
| TTAAGATTTGCCCTAATTCAAT |
| TTAATGCCTGACATGAGACTGT |
| TTTCCGTGTAAATCGTCTGAGA |
| TGGTAGGTTAGAAAGCACCGGA |
| TAATCCAGTCAGGATCTTCTGG |
| TAGAAGAGTGTCTCCACCGAGC |
| TTACATATTAAGAGCTGGGCC  |
| TTCTTACATATTAAGAGCTGG  |
| TTAGGAATATTTAGAGTCCTGA |
| TTCAGAATCAATAGCTTCTTTG |
| TTTATTGAGCTTATCCACCAGA |
| TAAGCAGAGAATGTACTTGTTG |
| TATGACTACAGATGCACTGTTT |
| TAGATGAATATCAACACGGAA  |
| TATTATACTTCTCAAATACTAG |
| TTAGTTTCAAATAGCTTCTGGA |
| TTAAGCACCATTTATAACTTA  |
| TAAGTCATTCAGGTACCTCGGA |
| TTTGAGCTCATGTTAGAGGTGA |
| TATTGGAGCAGTATCTACCAAG |
| TTAAGTGCTAACCACAGGGAA  |
| TAATATTGAGTCACAAGGGTTA |
| TATCTGGGCGAATAGAACGCAG |
| TTGGTCATGTTGGAAGGGCTGA |
| TTAGTGTTCTGGTTGGTCATGT |
| TTTGTTTGCCCAAGATGGGTGG |



|                         |
|-------------------------|
| TCGCTGAATGAGTACATCCAAT  |
| TGTTTCTCCATGCAATGCCTGC  |
| ATGTTTATTGTTCTGGAGGTAG  |
| TTTCCTGCCTACGTCACGGAGG  |
| TTATGCTGCCAATCTCTGGCTA  |
| AAGGACACTATGAAGGCTGTGG  |
| TGAATCTTTATTTCCAGTGGTC  |
| TTGAATCTTTATTTCCAGTGGT  |
| TATCTGGTCTTATTGATCGTAG  |
| TTATCTGGTCTTATTGATCGTA  |
| TTATATGGCAACTCATTGGGAA  |
| TTTCTCACCCTATTGTCCTTG   |
| TTTCTTTAATAGATCCGGCTTT  |
| TAGGCTATGAGTCAATGCCAGG  |
| TAATCGATCACAGCCCAGGGAG  |
| TTTCATATGTCCAACACCGGGC  |
| TTCACTATAGGGAAGTTCCTCA  |
| TAATTCTAGAACCACATATGGT  |
| TTTCAGTGCTAGGAGTTCCTGC  |
| TGATATGTTTCATGCAACTGTGC |
| TAACTGGTGGATCCTCTGCTGC  |
| TTGACGCCTACAGACAGCGAGG  |
| TTAAGTTGGGTCCGAGGCCGT   |
| TTTGGTAAGGATCTTGCCCAGC  |
| TTTCTGTAGAGCCTTCCCAGGG  |
| TGGTGCTTCAGCATGAACGTGT  |
| TTAGCTGTGATGGCTACGGAGT  |
| TAGTTGTTTCATCAAACACCAAT |
| TAATACACTAGGGTCATCCTCA  |
| TTGTACTIONAATAAGCACCTGG |
| TTTATTAAATATGCTGACCTGC  |
| TTTATTGAGAAGTTGCCGAAGT  |
| TTTGTAGCGCAACTTCAGGTTG  |

|                         |
|-------------------------|
| TAAGTGGTCGATGGAGGCCTGA  |
| ATGATCTGCATGGTGTCCCGGG  |
| TTAAGAATAGTGTTATGGGTG   |
| TTGCAGATAGGCATCAGTGTGG  |
| TAGTCAAATATCCCTTCTGTGG  |
| TATTAAAGGAACACATTGGATC  |
| TTTATTAAGAACAACCTGGAGTG |
| TTCATGAATTAGTATGCGCTGC  |
| TTCCATTGCTACATGAACGTGG  |
| TAAATCTTTGCCTATTACCTGT  |
| TTATACTCAAATAATGACTTTA  |
| TTGTTTGTGATCACATATCTTT  |
| TTCTTTACTAATTCCGACGGT   |
| TCTACTATTAAGTATTTCCAAT  |
| TTTAACTCCCTGATTAGCCGGC  |
| TTAACTTCAGATCTATAGGGA   |
| TCTTAGATTGACTTAACCCAGA  |
| TTAGTAACTAGCTTCCGCCATC  |
| TTACTGACAGATTCGCCTGTAG  |
| TTCATTCTCCACCTCAATGTAC  |
| TAAC TTATAGGGATATCCTGAT |
| TTGAGTATGAAAGTCTTGGAAT  |
| TTTAATAGCATTCTTATCATAG  |
| TCTCTTTATATGGCCAACCTGA  |
| TTCTTGCCATATTA CTTCCTC  |
| TTTCCTTTAACGTTTCTTG GTA |
| TTATTGCATAGTCTTATGCAGT  |
| TAGAGATTTAACAAGTGTCTGA  |
| TACTGTTGTCTCTAGTTCCCTGG |
| TTAAAGACTAATCTATGCCCTT  |
| TAAGGGATTATTGTCATCCAGT  |
| TAAGAAATAAGTTTCGAGCTGA  |
| TTAAATTTAGGAACAAATCTTG  |

|                        |
|------------------------|
| TTGGGTTTCAAGGTATCTGGTT |
| TTTAAGATCTAAATCAGGCATT |
| TTCTATGCTATCATCCTCCATG |
| TTACATTAGAACATCTACTTTT |
| TAATTCATAATCTCACTGCGGC |
| TTGTGCTATAAATACCACGTAG |
| TTTATCGACATCACAAGCGAAT |
| TAGTTGATTGAATAGCTCCAGT |
| TTCAGAATCAATTACTCCCAAT |
| TTTCCCTCGAAGGCAATCGTTC |
| TTACGCACTAAGTCATAGCTAC |
| TAATAGAGTAACTCCAGTGATC |
| TAGTTAATAGAGTAACTCCAGT |
| TTGGTGAAGGAGATCAGGCTGG |
| TTTATTACAGCATGAACCCAGG |
| TTTAGATCCAACCTCTCTGGAA |
| TTTGGTATGATTCCACCTGTTG |
| TTCTTCATGATAACCAAAGAGT |
| TATTGTTATAATCACATACTAT |
| TTGTTTGCCCAGCATATTCTTG |
| TTTGAGGTCAGTCACTTGCTGC |
| TTGGACACAAAGGATCCCGGA  |
| TATTCTGACGGTCTACTCCTGA |
| TAAAGTGTGATGTTATTTCATG |
| TTATTGATAATTCTTTATCCTA |
| TTAGATAGCATGTCCTGGGTGT |
| TATTGTGTAAGTTATATGCATG |
| TACAACCTCAACATGAATCAGT |
| TTGAAGAAAGTAATCCTTCTTT |
| TAAATGTGAAGGTTGACCTTC  |
| TTCATGGTTGGTATGAGTCTGT |
| TTAATTTCTTTGTAGCAGGGTC |
| TATTTGACGCAGAACCTTCTGC |

|                          |
|--------------------------|
| TAGCTTATCCTCATGATTGGTG   |
| TTTATATTGGAGATCAAACTTT   |
| ATCATTTCCAAGTAAATCCTTA   |
| TTCATAACGATCATGGTGCGGG   |
| TAAATCTCTGACACGGAGCGGT   |
| TATTTGATAAAGAATAACTTGT   |
| TTCAAGAGTAAATTCTTTGTTT   |
| TTTATATTGATCTTGGAGGTTT   |
| TTCAAATTCACTGTATCGCGGG   |
| TATAGATCCATGTCTTCCGTGT   |
| TTCAAATTTGACTTCAGTGGGG   |
| TTCTAGTTTGACATTCTTCAGC   |
| TTCTGTTTGAAACTGACCAGG    |
| TTGCTCATAGCGTTCGGGCTGC   |
| TTCTTGGTGATGACGATCTGGC   |
| TTCAAGTGAAGGTGTCACCTGC   |
| TTGTCATTTAAGATCAGCTGTC   |
| TAGAGATCCATGTCTCCTCCGTGT |
| TTACTTCTGGAGTAGATTCTGG   |
| TAACTCTTCATCTAAAGTGTAT   |
| TAATTTAGGAATATTCTTTGGG   |
| TAAGTGACAACTCTAGTCCCTA   |
| TTCCGTTGGAACCTGGTTCTTT   |
| TAGGTCTTGAATTGTTCCAGG    |
| TTAGGAGTTAGAACTGACCAGG   |
| TTAGCAGTTATCCAGAGGCTTG   |
| TAGGATAACTACAAGAGGCTGA   |
| TATACATCTATGTTCCAGGTTA   |
| TCTACTTATAATTTCTTGTTT    |
| TTTCTTAGGGATGACAGGGTGT   |
| TATCATTCTAGTTATGATGGTC   |
| TTTATCACCGACTACACCGAGA   |
| TACAATCGGATGTACTTCCTTC   |

|                         |
|-------------------------|
| TTAGCAGGTATAAAGAGGGTGT  |
| TAGCTTAGGTACATGTAGCAGC  |
| TTTACTCCTTGATTCACCCTGA  |
| TTGCTCTTGTGGTTCATCGTGA  |
| TTCTGGTTCCGGTATTTCTTT   |
| TAGATGACATTAACCAGGTAA   |
| TTATTAAATAGGTAAAGGGTTT  |
| TACCATTCCCAAGAGCCGGTTA  |
| TTGACCTGCTCATTGAGGTGA   |
| TTGCGCTCAATCAACTTCTTGA  |
| ATCAGGATCCTTAAGCTCCTTG  |
| TCATTGATCAATCCACGGGAA   |
| TTCCATTTAAATACGTCTCTGA  |
| TTTCAAGCTAACACCTTTGTGG  |
| TAAGATTGTACAGCGAATGTTA  |
| TTAATGACTATTAGTGACCCAA  |
| TCAATGTTCTTCATCCGGGTGA  |
| TTTCTCAGGAGTCCGGTCTTC   |
| TTTGGGACCAGTAACTTCGGTA  |
| TTGTAGTAATTGATGAGGTGA   |
| TAGTATCTCCATGTCAGTGTGC  |
| TTGGTAGGAATAATGAAGCGG   |
| TATATCTTGACGGTCTGGTGA   |
| TCAAAGTGGAGCTTTATCCGAT  |
| TTGAACATGAGAATGGCGTTAT  |
| TTTGCTTAATCCACATTCTTA   |
| TAAAGGTCCAAGATCTTCCTCT  |
| TATTTCATAAGGGTAAATGATC  |
| TAAATCCTTACAACTGGGTAC   |
| TAACGGAGCAGCTTGTAGGTGA  |
| TTCTTAGCAAAGAAACACCAGT  |
| TTTGATGTCCTAATGTTTCAGTA |
| TTCAGCTACAAGACTAACATTT  |

|                         |
|-------------------------|
| TATTTAGAAAGGTATATGCCAA  |
| TAGAGCTGTCGGAAGTCTCCAG  |
| ATCAGGGCTAGAGCTGTCGGAA  |
| TTACTCCCTCTTGATCATGGAA  |
| TGGGATGCTAGCCTACAGCTGG  |
| TCCAGTGATGCGCACATGGGAT  |
| TTAATTTCCAATGTTCTGCTA   |
| TAAAGTTTAAATTTCCAATGTTT |
| TAAGGTTCTGAAATGACACTGA  |
| TAACAATGGAAATAGCTTCATC  |
| TATGTAGCCCTGACTATGCTGA  |
| TTAAACATTCTCTGTTGCGGGT  |
| TTGAATCTCGGACAGGGCCTGG  |
| TTATGTAGCCTTGGCAACCAGG  |
| TTAAATGGAGTTATACTGCTCA  |
| TTCAGGTCTGGTTTACCCTTGT  |
| TAATTTGTTCTGTTACATCTGA  |
| TTACAGGCGAAACCCAGTGGA   |
| AAATATTTACGTAAGTGCTAC   |
| TTTAATTGGGAACTTATTTGG   |
| TTGGTGATCTGGTCCACCGTT   |
| TACCTGGTCCAGGCAAGGCTGA  |
| TTGTCCTATGATAAGGAGGCAG  |
| TAGCCTTAGGGACATAAGGTGG  |
| TTTATTGAAGGAAAGTGACTTC  |
| TTGATCTGAACTTCAATCCTTG  |
| TTGTATGAAACAAAGATCCAGT  |
| TTATTTAGTCCAACAAACTTGG  |
| TTAACTACCTAATACAAAGTGA  |
| TTTCTTCAAAGGTATTTGAGG   |
| TATCCAGAAATTATGATGGTTT  |
| TATCTGATTTCCATCCAGCTGA  |
| TGAAATAATTACATCCTGCAGG  |

|                          |
|--------------------------|
| TAGGTCTTCAACCTGACTGTGC   |
| TTAATTACTAGTCAGACTGCTC   |
| TTAACCTGAATCTACAATCTTG   |
| AATTATTTAAGAATGATCCTTT   |
| TTCTAGTTCCTTACAATTCCGG   |
| TATAGGGCCTTCTAGTTCCTTA   |
| TTGTAGTCTTGGATAACAGTGG   |
| TTGAATTAGAGGATGAGGGTGA   |
| AAGATTTCCAAATTCGGGCAGC   |
| TTCAGGATTGGAAACACGCTAT   |
| TTTCAGATAAACAACGCCCTTT   |
| TTTCCTTGAATCCACACTCGGT   |
| TTGTATTTTCCAGACACTTGTGTG |
| TGCATATCTAAGAATAGCCCGG   |
| TTCCATAACACCTGTCTGGTGA   |
| TTCTCCGAATTTACAACCTTC    |
| TAATTGCTGGTAAGAAACCGTT   |
| TCGAAGGATGACTTGAGCCAGG   |
| TCTATGTGTCATTCAAACGGTT   |
| TTAAAGTCCACTCTGATCCTGT   |
| TTATCTGTCAGTGACTTCCAGG   |
| TAAATTAGGATAATACCGCGGT   |
| TTTGTCTCTAACCAGAAGCTTG   |
| TAGCTTAATTTACATTCCATT    |
| TTCATGATTTGTTTACATCGGC   |
| TTCACTTCTAGGGACTTCCGGG   |
| TAAAGTTCGATTCTGGTTCAAG   |
| TTTGTGCTGGAAGTACCCTGT    |
| TTTGATAGTGGCTCCAAGGTGT   |
| TATTTGATGAAATATCTGCAGC   |
| TTTATGCGTAAAGCAGCCCTGT   |
| TTTAGTAAAGTGATCACTGGTT   |
| TTTAGTTAAACTGAGGGCCTGC   |

|                         |
|-------------------------|
| TTGTCCTTTATGGCAACCTTTA  |
| TTCAACGGTAGGATCTACCCGG  |
| TTTAACTTCAACTCTGTTTCATG |
| TTCAGTAATAAAGCAAGGCTTT  |
| TTATACTACTAACGGTCTTCAAA |
| TTAAGCTCTTCAATCCTGCGGA  |
| TTGAATGTCGGTGAAATCTTTC  |
| TAGTAATACTCAATGATGCTGG  |
| ATAGTTGGGAATATAAACCTGC  |
| TTTCAAGCCACCATATTTCTTC  |
| TTATTGAGCTCCTCAATCCGTC  |
| TTCGATTATCTGATTCTCCCTC  |
| TATCATTGAAATCCTTCCCGTA  |
| TTGGTTTCAGAGGTGCCTGAGC  |
| TTTAGCATGCTTGTGCGCGAGC  |
| TTGATTGTTCCCTCTCATCTGA  |
| TTAATAGCAACAAACGGCCGTC  |
| TTACATTAGGTTTCTTTGCGGG  |
| TATTTGAGGCAGTACTCGCAGA  |
| TTTCGATAGATCTCCTTCCCTG  |
| TGTGACACAGATAACATGCTGG  |
| TAGGTGGTTTCTTATACTGGGC  |
| TTCCATCTGAACTACTGCCTGC  |
| TTCATGTTGAAATTGTAGCTTT  |
| TTCTACATCATAGTATAGCGTC  |
| TTAACAGTTACACTGAAACTGG  |
| TTGGTGATAAAGGCACTCCAGG  |
| TTTATCACCAAAGCGTTCTTGT  |
| TTGGTGGCGAGTTTGACCGGGG  |
| TTATCCTTTGTATTCTCCCTAC  |
| TTCACGTTGACATAACTTCTGT  |
| TTTAGCACCATCTAGGTCTTTT  |
| TTGATTCATATAGCCGTGGTTG  |



|                         |
|-------------------------|
| TAAAGTTAGAGGCATTTCCATA  |
| TTACATGCGATTTGTAAGCTTA  |
| TTAAGTTTGATCTTACTGGAAA  |
| TTAAATACTATCAACTTCAAGA  |
| TTTATTAACAATAGGAACTTTC  |
| TAATTGGTTAAGGATTTCCAGT  |
| ATTTATACTCACATTCCTCTTC  |
| TATTTCTTAATCATAGGAGTGA  |
| TGAAATTCGAGTGTGAAGCTGA  |
| TTAACGATCAATATCTTCTAC   |
| TTATGTCTTCAGTAACTGCATG  |
| TACCTTGTCACACTCATTCTGA  |
| TTCAAGATCATGAATTGCCCTT  |
| TTCTATTTCCATAATCCCTGA   |
| TTAGAAGTTTAGATGACTCTTA  |
| TTTCACAATAGAGTGTTTCAGT  |
| TATATTGACAACCTTTCCGGAA  |
| TTGCTGGCTAATCTGACCCATC  |
| TTCAATTTCAAGTGCCTGCCGGC |
| TTGGGCATTAAGAAAGCCTGC   |
| TTTATTTACAAGAGCATCCAGA  |
| TTAAGTATACTGGGCACCGGAG  |
| TTCAGGTACGCATACTCCTTGG  |
| TCTGGGTTGAAGAGGATCGTGC  |
| TGAAAGTACAGCTTCTGTCTCC  |
| AATAACTTAATTTAGTTCTGTA  |
| TTCAATTGGTATATGATTCTGA  |
| TATATGTTCCATCAACTCCTTT  |
| TTAACTCTTCAAATCTTGCTGC  |
| TTTAACAGCAGTAAATCCCTGC  |
| ATAGTATGAAACTCGAACCTTT  |
| TTGGTCATCTATATTCTCCTCC  |
| TTTCGTCTGCATCCATTGGTC   |

|                        |
|------------------------|
| TAGAAGTCGTTGATGAAGGTGC |
| TTTGAAATTGATTCCAATGTGC |
| TTTCTGGAGGGAATATTCGGTC |
| TTCAGAGTTAATTCATCCTCT  |
| TTTGACACTGTGCTTGCCCTTG |
| TAATTGAGAACTATAGCCCTTT |
| TTAATTGAGAACTATAGCCCTT |
| TTTACTTTCATCCTGCGTGCTG |
| TTACTTTGTCTGACAGTTCCTT |
| TTTAAGGGCAATTCAATGTCT  |
| TAGGTTTCTATAGTGTGGTCC  |
| TTGTGCTTTAGGATTGGCCTCC |
| TGTCTGATCAACATTCACCATA |
| TTGATGGGCAAGTCCACTATC  |
| TTGGCGTTTGTACTCAGCGATT |
| TTTGTGGTGTCCGCACTGGGG  |
| TTGGCTTTCATGTCATCCAGGC |
| TAGGGTAGGACTGTGGCCTGG  |
| TTTATATGATTCATAGTCCAGT |
| TTAATCAGAAGACTTAATGTGG |
| TTTCATATCTTTAACAGCCATA |
| TTAAATAATCACCCAATTCTAA |
| TTGCAGAAGGAATGTAAGCATT |
| TATGCTGCATAGAAGTCCCGTC |
| TAGAACTCAATGAAAGACTGA  |
| TTCATAGAGGATCTCCACCTTG |
| TTAAGGTGTAGTATTCCTTCAG |
| TAACTGGTCTATTAATGCCTGG |
| TTAACTGGTCTATTAATGCCTG |
| TTGCTTTCACAGTTCATCCCTT |
| TAAGAGTGTAACAAAGTCCAAA |
| TTTCTTAGTAGCATCTAACAGA |
| TATACGTGCAAATTCACCCGAC |

|                         |
|-------------------------|
| TTTAGCGTCAAGATCATTGATG  |
| TTTGATGGTACCCAAGTACAGC  |
| TATCCTTCCATAGAACCAGAAA  |
| TTCATAGAATCTGTCTCCGTAG  |
| ATCTTTATTACAGTCATACAGT  |
| TTCCATGTCATTCTGCGTGTGG  |
| TCTGAAACCAGAATGATCCTTA  |
| TTAATAGCCACGATAAACTTTG  |
| TACAAGAGTAATATGAACTGGG  |
| TTCCAAACTAATGACATTGAGG  |
| TAAGCCTCGAAAGATGTCCAGA  |
| TTTAATGAGCTGTACAGTCCGC  |
| TGTTATGTCAACGTAAAGCGGA  |
| TAGAACAATAAGCTACTTCCTT  |
| TTGCTGTTGACAAATGCTCTTC  |
| TTTGGCTTGAGCATGTTGCGAC  |
| TATGTTAATGAGTATATCCGTT  |
| TTTGTGTCAAACACAGCTTGA   |
| TAGAAGTAGATGTTTCATCCCGT |
| TTTCTCACTACTGTATTGCTTT  |
| TAGAATTTCTTTCACGCTGTAC  |
| TTTAGTAATAGGAAGGCGCTAT  |
| TTTAAGTGTGGCCTGAGCCTTT  |
| TTAAAGAGAAGTCAAACGCCTC  |
| TTCCTTTGTAGGAAATGCAGC   |
| TTTCGGATGCGTTTGGCCCTGC  |
| TTAAGGTCTGGGACAGTTCTGT  |
| TTGAAGAGCAGGTCATGTTGC   |
| ATGGTCATGAACATGCTGGCGC  |
| TTGGTGTAGTAATCAGCCTTGA  |
| TTTGGTGTAGTAATCAGCCTTG  |
| TACTGTACCATCCTCGTTGAAT  |
| TTGTAGAAGATGCTCGTGCCTA  |

|                         |
|-------------------------|
| TAGGACAGAGATGTCCGCGTGG  |
| TTCGTAAATATCATCTTAGATA  |
| TAAGTCTGCAATAGCTTCCAGA  |
| TAGAGAACCACAACCTATGTGC  |
| TGAGATGCTTATATTGACGTGA  |
| TTGCTATGCAGTGAAATGCTTA  |
| TTATACATCCACTACCACGATA  |
| TAGTAGGGAAGCAATTACCGGG  |
| TTGCTTTCAAAGACCTAGCAGG  |
| TTCTTTAATCACAAGACCCAGG  |
| TATAGGACAAATTTAAAGCCAG  |
| TAACATACCAAATCTCTAGGTA  |
| TTGGTGACCATGACACTCTGGA  |
| TTTGATAATGACCAGAGGCTGC  |
| TTGCGGTAGAACATCTTACTGC  |
| TTCCCTTCTTGTAACGAACCAGG |
| TTCTGAAGCATGTACTCTGTGA  |
| TTTATAGTAAATCTGTTGTTG   |
| TTAAATGACAACCCAGGCGGTC  |
| TTCAATAAGTGCATCTACGGGA  |
| TTGACTATTCTCAAGCCGCGTC  |
| TTATTGCATATCAATCTCGTGT  |
| TTTCACAGAGCTTTCATTCCGGC |
| TTTCTTAGGAGTGACCTCTTC   |
| TTGATCTCCGTATCTGCGGTGC  |
| TTGTAGAACAGCTTTGCTCTTC  |
| TTGATTCCCAGAGACAGTGTGA  |
| TATCTGTTGAGCGTAATCCGG   |
| TTTCGCAGACATAATCTCGTTT  |
| TAACATAATTACAGGCCTCCTAA |
| TATCTCAACACTGTTAATGTTC  |
| TTTGGTATCCTCTACACTCAGC  |
| TTTCTCTTAGGATCACCGGTGT  |

|                         |
|-------------------------|
| TATCTCATGAATCTTCCTGTGC  |
| TTTAAATGTGGCATCACAGTGG  |
| TTAATCAGCCAGAATACTCTGT  |
| TTAGATTCTGTTCTCCACAGTG  |
| TCCACTTCGATTGATTCCGGGC  |
| TTGCTGTTTAATCCGGCCAGT   |
| TTAATCATGACTTCCTTGCTG   |
| TTATGCGAGGTCATGTCCGGG   |
| TTTAATAAATCTCTTAGGGATA  |
| ATACCGTTTAATAAATCTCTTA  |
| TACCTGGATAAACTATAACCGTT |
| TTTAGGGTCGGGCTGAGCCTAG  |
| TTTGGTAACACATGAAAGCTGG  |
| TTGACATTTGACTTATCACTGA  |
| TTTATGTCCGGTCAACTCGTGC  |
| TTTATGGTCGACTGAGACCTGT  |
| TTAAATCTTCACTTACACCCAT  |
| TTATTTACAAATCTATAACTTT  |
| TTTCAGTGTAAGAATTTGCAA   |
| TTTCTAAATCAGGTTACTCTGG  |
| TTAATGGCTAATACTAGGCAGT  |
| TAAATATTTAAGGCTTCCTGT   |
| TTTACTTTGAGATAGCTTCAAT  |
| TTGAGTTGAAGTTAAGCCCTT   |
| TATATTTGAATTACCCACCCTG  |
| TTCCACTCAGGATACATGGTGG  |
| TTTAATGGCTCCACGACGGTTC  |
| TAGTTATAAACCTTGAATCGGT  |
| TTTGCTGTGTAGAACTGCAGT   |
| TTGTGAAACATGGAGTTGCGGT  |
| TTGTCTTTGAAGAGATGCCGAT  |
| TTGTAGTCTTTATATTGTCGGT  |
| TTGGCCTCATTCCAATGGTGC   |

|                         |
|-------------------------|
| TTCAATATGATCATGTCTCATA  |
| TAGTTCAATATGATCATGTCTC  |
| TATGATTGACTTTGGCCTTGA   |
| ATATGATTGACTTTGGCCTTG   |
| TTCTACATCAAAGTGAAGCAAA  |
| TTCTGTGCGTACTTTGTCCTTT  |
| TTGGTATATGAAATCTCTGTAA  |
| TCTTATGATATCCATAGCCTGG  |
| TTATCTAGGCTTACTACCCAGT  |
| TAGAGTCCAATCACGAAGCGGT  |
| TTCTGAATGAACTCCCTCTTG   |
| TTAGGTAGGAAAGCAGCCGAA   |
| AAACTTGCTAGGTAGACCGGGC  |
| TTCTTCAGGATGCCTAAGCGGT  |
| TTTCATACTGATAGGGATGGGG  |
| TTTCATACAGAATTAGACCTGT  |
| TTCAATAGTACTTAAGAACAGC  |
| TCAATTATAATGCCCGCTGTGG  |
| TATCTTGATATCAGAAACCTAA  |
| TTGCACAGAAACGTGAGGCTTG  |
| ATAGTGATCAGTTCTGTCCTGA  |
| TGAAACTCCACAACATAGCTGA  |
| TTTGTCTTGAACACATGCTTA   |
| TATGGTGATGACATTGTCCAGG  |
| TTGAAGTCCTTGACTGTCTGT   |
| TTCATAGCTGTGTAACATCTGT  |
| TTGCTTTCACATTAGAAGCGGT  |
| TTTAATTTTCAGCATGTATCCTT |
| TTTATTTGCTTCCTCATGCTGT  |
| TTTAGTTCTAATGCCACTGAAA  |
| TTTATCACTTACAAGCATCATG  |
| TTTATTACAATCTTGATAGTCA  |
| TAGTTTGTGTACTCTATTTCAGT |

|                          |
|--------------------------|
| TTCATTACCCAACTTTCCCAA    |
| TTTGCAAACAAGATCCACTTTC   |
| TAGAGTTTCGGTTTAAATGGAG   |
| TTTATACACAATATGGAGCTAC   |
| TAAGGAACGAACCTCATCTTTG   |
| TTAAACCTCCTTTCAGTGCTGA   |
| TAGATAAGCATTATAATTCCTA   |
| ATCCATGATGGCTTCTGCGGG    |
| TGGCGGTCTGATCAGATCCAGG   |
| ATTCCCAGTAGTCTTCACGTAC   |
| TGAAATTCTAACTTATAGTGG    |
| TAAATTTATAAACACATGGTAA   |
| TTTAGTTACAATGGTACCGGAA   |
| TTATATTCAGCGAACATGCATT   |
| TTTAATACAACCACTAATCTAA   |
| TAACTTAATTGTTCCACGGTG    |
| TATCAGGTTATCTCCACTGTTC   |
| TTCATTTCCCTCAAACCTCCGGG  |
| TTCTTGACTGCAATCAGCCAAT   |
| TTAATGAGTAAGTGCTTGCTTA   |
| TTAAGGCTTCAAACCTTCCAGG   |
| TTTGCCGATAAGATCATGCGGT   |
| AAAGCGATTAGTATCTTCCTTA   |
| ATTAGAAATTATAGGAGTCGCT   |
| ATATATTGAAGTATCACTTTTA   |
| TTCTAGTTTAGGGCAACTGTGT   |
| TTTCAGAAAGCAATCCCTGAGT   |
| TAAGAAATCTGCATAGCCCGA    |
| TTTAGCACGCTTCATTTCTGCTGC |
| TAAACAATGAAGGTTTGTCTGA   |
| TTGCTCATTTACACCGCTCGTG   |
| TCCAATATAGAACTCATCCAGC   |
| TTGGCCTTTGATATCAAGCTGG   |

|                         |
|-------------------------|
| TTAACATTATGTACAATCCAGC  |
| TAAGGATACAAAGCCTGCGTGC  |
| TACATAAGGATACAAAGCCTGC  |
| TTCATGGAAATTAACCCTGAAG  |
| AATTCATGGAAATTAACCCTGA  |
| TTAAGTACAAAGAAATGAGAGA  |
| TTTAAATTTATCATCTTGGAT   |
| TTAAGGTGTAGGTATAACCATC  |
| TTTCAGTTTGAGAACAGCCTTT  |
| TTCAATTCTAACCATGAGCCGG  |
| TCACTTATAATCTTCAGTCTGC  |
| TTTGTTGGCATGAGGATGGGTC  |
| TTGATGGCCATTGTGGCCCGGA  |
| TAAGCCATTAGAAATCAGGTTG  |
| TTCTTAGCTCTATAAATTCTGA  |
| TTAACCAGCATGTCTGCCGAGA  |
| TTGTCTTCTCGTTTGTATCGGA  |
| TAATTCTCTATGCAGCGCCTAT  |
| TTTGAGAATAACCAAAGCCTAG  |
| TTGAAGACAGAAATTTGAGGTGG |
| TTGATCTGCATTATATCTCAAT  |
| TTGGTTACAATCAAGGCCGAAA  |
| TTTATCTCACAGTTACACCCTC  |
| TTTAAATACAAAGCTAAGCCAC  |
| TTGTTTGCTATTTAAATACAAA  |
| TTGAGAAGTACCATTGGGCGGT  |
| TTTCTCATGGGTCTGATCCGGG  |
| TTAAAGGGTTGAAACTTTCTGT  |
| TTTAAATGGCAATACCATGGGTT |
| TAAGTAATGAACATACCCTTTT  |
| ATAAGTAATGAACATACCCTTT  |
| TAAATTGTCAGCTTTATTCTTC  |
| TATTTCTATACTTAAACCGTGG  |



|                         |
|-------------------------|
| TTGATGGACATTCTATCTGGGC  |
| TATTGATGGACATTCTATCTGG  |
| TAGAAGACAGCTTTATTGCCGG  |
| ATGGGTTCCAATAACTTGCTTA  |
| TGCACTTACAATAAATTCGGGT  |
| TAGCTCGGTAACTCTTTCCTTT  |
| ATAAATTACTATGCCACCGGG   |
| TTACTGTCCAGGTGAAGCCTTT  |
| TTGTCTTTGATAGCATCCGGAG  |
| TTACCCAGTAGCTATCTCGTGG  |
| TTTCTTCCCAATCATTCTCGGA  |
| TTAAATAGCTGGGACACTCGGC  |
| TAGGAGTTCAGCTTGAACCTAC  |
| TTTGATCACATATAACCATCTTA |
| TACTACAATGGTATCTCCCTTT  |
| ATGATCTCCAGGAAGCCGTTGT  |
| TTCTTGGAATGTCTATACGGT   |
| TTCAGCTTGCCGTTCTTGGGAA  |
| ATGGCTATGGGAGTTGTCCTGG  |
| TAGCATTGTTGAACTCCACAGA  |
| AAGGATATTAATAACAATCTGC  |
| TTCTAAATCATTAAACATTGTTG |
| TTAATGTTCTCAACATTCCTAC  |
| TATAGCTTCATTAACAACCTCT  |
| TTCCCTTGTTAATGAGCAGCCGT |
| TAGGTTAATTTGATTTAGCCAT  |
| TTGGGTGAAGTCTATTTGTAG   |
| TTTCTAATAAGCAAGGTCTCTT  |
| TAGCTGTTACAAAGGTCCCGTG  |
| TTCCCGCTGCATAAGATCCAGC  |
| TTTGTAACGTGTTGGAGCTGT   |
| TGGTTCATGTTTGTAACGTGT   |
| TTACCGATCAACATGCTAGATT  |

|                         |
|-------------------------|
| TTAATATTTCCCATGTCCCTCC  |
| TAATGAAGCGCTGTAACCTTTT  |
| TTAGGGATCTTGAGCAGCGGAA  |
| ATCAGAAATATCAAAGTGCTTC  |
| TTTCCTGCTAAAGCTGGGCAGA  |
| TTTCCCGTTAGTGCCCTGCTTT  |
| TATCAAATCCCAATTACTCATA  |
| TACAATCAGGATAATTGCCTTC  |
| TGGTGGGTCTGAAGATCTCGGGC |
| TCCTCTACAAACATGTTTCCGT  |
| TTATACGAAACATGCACTGCAC  |
| TTATTGCATTGGGAGCTTCTGG  |
| TTCTTTAGTACCTTCAAGCTGG  |
| TATTTCTTTAGTACCTTCAAGC  |
| TTCTTTGTCAACTCCGGGCTAT  |
| TAAAGTGAACACTTGTACGTGA  |
| TAAGACTTGCTCAGACTGGAGG  |
| TTGTATACCATCTCGTTGCAT   |
| TAAGACATCAATATCTTTCATC  |
| TTTAATTCTCGCCAATAGCTTA  |
| TAGCTTGTAATCAACCTGTGG   |
| TAGAGTACCATGAATACACTGG  |
| TATTCTGGTAAGTCTTTCCTGG  |
| TTAATTCATAGTATTCTGGTAA  |
| TATCAGTTCCACTTGCTTCTGA  |
| TAGAAATATACTATCCACCCAC  |
| TTTGATGACATACTCTACCTTC  |
| TTGCATAATAGTGTTTCATCAGT |
| TTTGTGGTTCCATCAAGCCTGA  |
| TTGATCTTCCCTTGACGGAGC   |
| TTTATTACTGTCTGACTCCAGT  |
| TTGCTCTTTATCTCCTATCAAG  |
| TCTATAACTAAGTATCTCCAGT  |

|                         |
|-------------------------|
| ATTAATTACACAACCAAGCTGA  |
| TTATACTCCATCTTGCTACTAA  |
| AAACTTTATACAAATGATGTGT  |
| TTCAATGGCATGGACGCTGTTG  |
| TACTTTGTTCCAGTCGTCCTTG  |
| TTCTTCGACCTTACGCACGTGG  |
| TTTCTCAGGATCAACTATCGGG  |
| TCATATTTGGACAAGGCCGCGT  |
| TAATATACTGCCACAGTGCTTG  |
| TACAGGACGGGATAACAGGTGA  |
| TAACACTATCTAGAGGTCCTAT  |
| TTTCTCTCAAATGCTAGGAGG   |
| TTCACTTGGAACCCATCTGTTT  |
| TTATGGACTCAATCGTCTCATG  |
| TTGTTACGGGCTCCTAGGTGT   |
| TTTGTCTGTTACGTGACCTTTA  |
| TTGATTAATCTCAGCTCTGAGG  |
| TAGTTCTCAGAGAATGATGGGT  |
| TATTTGGAAGAGTCGATTCTGC  |
| TACCCTGTAAGAGAACTCCTGG  |
| TTAAGCTCTGCCATCTATCGTG  |
| TAAGTCTTTGGTGATAGGGTGG  |
| TCCCTTATTAATAGATGGTGG   |
| TCTAGCACAATTATATTTGGGG  |
| TTGGCCAGAATTCTTGCTGTGA  |
| TAGGTCACAATGACATTGGGGC  |
| TCAAGGTCAGAGCTGAACGTGA  |
| TATTCTGTGAACTCATGCCATG  |
| TTTAAGACAACCTGCATTCCCGT |
| TTTGCTAATATTGGACTCCAGA  |
| TTGCTGTTTATGATCGCCTGGC  |
| TTTATTGTAATGGTTCTGCTCT  |
| TTGGTCATCAGGGAAATCGAAA  |

|                        |
|------------------------|
| TTAAGACATGCTTCATACTGA  |
| TAAAGCAGCCTTTAGATACTGG |
| TTCAATTATAATACAAGACTAA |
| TTAAGGAAGCAGGATATTGTAA |
| TATATCACCAGTCTTAATGAAA |
| TTGATTCCCGTCTCACAGCTGC |
| TTAATAGCCAGTCAATAGGAGC |
| TTATAGAGCACAATCTGTCATC |
| TAAATTATAGAGCACAATCTGT |
| TTCAACATCACGCTGGTCGGAA |
| TAGACCTTCATTATATTCTTGG |
| TTGATGGTGGAGTCATAGCTGG |
| TACTAGGGCAGCAATTCCTGT  |
| TCATGTCTAATCATTATCCTAC |
| TTTGTGAGCAGTTTAAGCCCAT |
| TTCAGCATCGTCATTCTGGTGG |
| TTGATGGGAGGATCCAAGCTGA |
| TTCATGTTGAGAGTCAAGGAGA |
| TCCTTTATTCATCAGATCCCGA |
| TTTCTTATCAATATAGATCTTC |
| TTTAGGTTGATCACCAGCGAGT |
| TTGTTCAAAGAAGCCCTCGGGG |
| TAGAATAGTCTGATTCTTCAGC |
| TTGATATAGACAAAGGACCTTG |
| TATGAATACGTTGTACACCTGC |
| TTCAATACGGACTCGTTTCTTG |
| TTAAGTGCAATGCCTGATGGGC |
| TAGGCTGGTATCTCAGCTCTGA |
| TTACATTGGGTTCTGACCCTTT |
| TTCAGCACTTATTTGTCTCTGA |
| TTAAACCTGAGAATAATTCAAG |
| TTAATCTATGAAACCATACTTT |
| AAAGCGTTCAATTACTTCCTTT |

|                        |
|------------------------|
| TTTGTTGCAACTATCTTGGCTC |
| TTTACCAACAATTAGCCTCAGC |
| TTAGTTCTCCAGAACAATGAGT |
| TTCCAGTGCTGAACGAAGGTGG |
| TTTGCAGTCATGGTTGATGAAG |
| TATAGCATTACAGTGCTCATT  |
| TTCATTACTGGAACTGCCAGG  |
| TTGATTGAAACATCTATCCTAG |
| TTCAGATTCAAGAACTCCGAC  |
| TAAGCAATAATTCTACACCTAC |
| TTGATTTCAAATAAACATTTAA |
| TTGACTTCTAATCCACTGAGC  |
| TTATTTGTCCTCATGTGCCCGA |
| TTTAGCTGTACAAATATCTTTC |
| TTTAATCAGAAATTACATGTTT |
| TTTGGTGTAACGACTTTGTTT  |
| TTCAGTTTCACAACCTCTGGGG |
| TTTCTTTACATCCACAGACGAA |
| TATCTTGTTGGCACACTTCGGG |
| TTCTTCAGCAACATGCTGCGGG |
| TTGAAGTCCCTCATGAGGCGGC |
| TAATGTTTGCAAGTAACCCAGG |
| TTACACTATGAATATCTCGCAC |
| TTAACTCAGGATTTGAATGGGA |
| TTATGCAGCAATAACTTAGTTC |
| TTAGCTTTCTACAATACTGTGT |
| TTCTATACTATTTGAAGGCATA |
| TTATGTAAGCGTCTGTTTGTGT |
| TTAATTATGTAAGCGTCTGTTT |
| TTGGAGGACGAAGATGACGAGG |
| TATAGAAATAGCCTACTCTTTA |
| TACCTATACAAATTTAAGCTGA |
| TTAAATACCATTGTTTCCTTTT |

|                         |
|-------------------------|
| AAATACATTAAC TACATGGTGT |
| TTGTTTATTAGCACAAATGCAG  |
| TAGTCCAGTTTCCTCGGCCAGT  |
| TATTACTAAATGTAGTCAGTTG  |
| TACCAATGAGGCTTCATGCTGG  |
| TTAATTAGAGCATTGTAGATA   |
| TATGTGGTGATCTCCGCCGAA   |
| TATAACTTGATAATCATTCACT  |
| TAAACTTCATGAATGACCCTGC  |
| TATAGGAAGAAATGGGTCGTGT  |
| TAGTCTTTACACATGAAGCAGT  |
| TACTGTTCAATTCTTACTCAGC  |
| TTAATTTCC TTCACATGACTGC |
| TTATCTTTAACAGCGACCCTTT  |
| TTTATCTTTAACAGCGACCCTT  |
| TTACGTTTCCTAGTCTCCGGGG  |
| TTAATTACTGCAAACAAGAAT   |
| TAATTCTTCCATTGTAGCCTTG  |
| TTGAGTAATTCTTCCATTGTAG  |
| TTTGGTCTGGAAATCATTCTGG  |
| TAATCTTCCAATAAGAGGTTGA  |
| TTAAACTAGACTCATAGTCTGT  |
| TTTAATAGCATCCTGAGGTTGG  |
| TACTACAATAATGAGCTGGTTC  |
| TTGATTTCACTTACTAATGTAA  |
| TTTAGGTTTATCCAAGCAGTTG  |
| TATCTTGTCACACTTCCGGTAT  |
| TAGTTGGGCACTTTGATTGAG   |
| TTTCATGCGAACACGACTGAAC  |
| TAGAATCTGATGACCACGCTAC  |
| TTAGAATCTGATGACCACGCTA  |
| TTCAGATAGGAGGTGCACCAGG  |
| TAGCTTACTGAGTGATAACCAGT |

|                        |
|------------------------|
| TAAATCTACAACAGAGTTCAAC |
| TTAGTCAACATCTAAGCCCAAG |
| TAAAGGAACATTTAACATCAAG |
| TTTACGACTGATAACATGGCAA |
| ATTTATTCTAACAAGAGCTTGC |
| TTTGGTATGATTGTGAAGGAGT |
| TTTAAGTTTGGTATGATTGTGA |
| TTATTCACCTTGATATGCTTGT |
| TTTATTCACCTTGATATGCTTG |
| TTGAGTTTCATACAAGCTGATT |
| TTTCTGAATGGTAATAGTCAGT |
| TTTAGTTTAATCTCGGGTGAGC |
| TTGACTTCCGTCTTAGAGGTAA |
| TTTGTTACCAATACCCTTCGTT |
| TAACTTTGCAAAGATCCTCAA  |
| TCTGGTATTAAGAATCAGCTGG |
| TTGCAAATGGGATTCATGGGTA |
| ATATCTTACATTAATAGGTTT  |

## 97mer shRNA PCR oligo

TGCTGTTGACAGTGAGCGACTGGGTATCTCTATGGAGGAATAGTGAAGCCACAGATGTATTCCTCCATAGAGATACCCAGCTGCCTA

TGCTGTTGACAGTGAGCGATGGGACTACAGTATCATGACATAGTGAAGCCACAGATGTATGTCATGATACTGTAGTCCCAGTGCCTA

TGCTGTTGACAGTGAGCGACCGGCCACAGAGATCATTGATAGTGAAGCCACAGATGTATCAATGATCTCTGTGGCCGGGTGCCTA

TGCTGTTGACAGTGAGCGACTCAGTATTGATTCAGGTAAATAGTGAAGCCACAGATGTATTTACCTGAATCAATACTGAGGTGCCTA

TGCTGTTGACAGTGAGCGACTGGTGGTACTCTAGAATAGTGAAGCCACAGATGTATTCAGAGTACCAAACAGTGCCTA

TGCTGTTGACAGTGAGCGATCCCTCTGTCTCGGCTAGTAATAGTGAAGCCACAGATGTATTACTAGCCGAGACAGAGGGACTGCCTA

TGCTGTTGACAGTGAGCGAATGAAGCGCCATAAGAACTATAGTGAAGCCACAGATGTATAGTTTCTTATGGCGCTTCATGTGCCTA

TGCTGTTGACAGTGAGCGGAGCTGGATGTGCTAAATCTATAGTGAAGCCACAGATGTATAGATTTAGCACATCCAGCTCATGCCTA

TGCTGTTGACAGTGAGCGACTGGATCATACTACAGCAAATAGTGAAGCCACAGATGTATTTGCTGTAGGTATGATCCAGGTGCCTA

TGCTGTTGACAGTGAGCGACTGGCATAACTACATGTGTAATAGTGAAGCCACAGATGTATTACACATGTAGTTATGCCAGGTGCCTA

TGCTGTTGACAGTGAGCGCTGCCACTGTGCATTATGAAATAGTGAAGCCACAGATGTATTTTCATAATGCACAGTGGGCATTGCCTA

TGCTGTTGACAGTGAGCGAAGGGCTGTTTGGATCCCTCTATAGTGAAGCCACAGATGTATAGAGGGATCAAACAGGCCCTCTGCCTA

TGCTGTTGACAGTGAGCGACAACAGCACCATGGAACGCAATAGTGAAGCCACAGATGTATTGCGTTCCATGGTGCTGTTGCTGCCTA

TGCTGTTGACAGTGAGCGAAGCTGTGATTACACCGTCTATAGTGAAGCCACAGATGTATAGGACGGTGAATCACAGCTCTGCCTA

TGCTGTTGACAGTGAGCGACAAGGTCCAGGTGTTCCGAAATAGTGAAGCCACAGATGTATTTCCGAACACCTGGACCTTGGTGCCTA

TGCTGTTGACAGTGAGCGCTCCCAGGAAGCAGGCGACCTATAGTGAAGCCACAGATGTATAGGTCGCTGCTTCTGGGAATGCCTA

TGCTGTTGACAGTGAGCGCCTGGTCTTACCCTGACACCAATAGTGAAGCCACAGATGTATTGGTGTGAGGGTAAGACCAGATGCCTA

TGCTGTTGACAGTGAGCGATGGTCTTACCCTGACACCAATAGTGAAGCCACAGATGTATTTGGTGTGAGGGTAAGACCAGTGCCTA

TGCTGTTGACAGTGAGCGAGAGAATCACTATGGAACCAAATAGTGAAGCCACAGATGTATTTGGTTCATAGTATTCTCGTGCCTA

TGCTGTTGACAGTGAGCGCCGGGACCTTGCTAATCATGGATAGTGAAGCCACAGATGTATCCATGATTAGCAAGGTCCCCTGCCTA

TGCTGTTGACAGTGAGCGAAAGGAATACCACTCCAGACAATAGTGAAGCCACAGATGTATTGCTGAGGTGGTATTCCTTGTGCCTA

TGCTGTTGACAGTGAGCGCATCAAGGTTATCATTAAAGCAATAGTGAAGCCACAGATGTATTGCTTAATGATAACCTTGATTTGCCTA

TGCTGTTGACAGTGAGCGCAGGCTTGACATTAAGTGAATAGTGAAGCCACAGATGTATTCAGTTAATGTCCAAGCCTTGCCTA

TGCTGTTGACAGTGAGCGACACAAGTCAAACCTTTATTTATAGTGAAGCCACAGATGTATAAAATAAGGTTTGACTTGTGGTGCCTA

TGCTGTTGACAGTGAGCGCCTGGAAATGACTATGATTTAATAGTGAAGCCACAGATGTATTAAATCATAGTCATTTCCAGATGCCTA

TGCTGTTGACAGTGAGCGCTTGGAAGTACAGCTCCATAAATAGTGAAGCCACAGATGTATTTATGGAGCTGTACTTCCAAATGCCTA

TGCTGTTGACAGTGAGCGATACAGCGTATTCATTAATAATAGTGAAGCCACAGATGTATTATTAATGAATACGGCTGTAGTGCCTA

TGCTGTTGACAGTGAGCGAAGCAATGGGATTGGTTAATAATAGTGAAGCCACAGATGTATTATTAACCAATCCCATTGCTGTGCCTA

TGCTGTTGACAGTGAGCGCACCGTCTAAACAGTCTCAAATAGTGAAGCCACAGATGTATTTGAGACTGTTTAGGACGGTATGCCTA

TGCTGTTGACAGTGAGCGCCAGACTCTTATCTCACATTAATAGTGAAGCCACAGATGTATTAATGTGAGATAAGAGTCTGTTGCCTA

TGCTGTTGACAGTGAGCGAAAGGGCAGTATTGGTAATTATTAGTGAAGCCACAGATGTAATAATTACCAATACTGCCCTTCTGCCTA

TGCTGTTGACAGTGAGCGCCAGGATCTTAGTAATATTGGTTAGTGAAGCCACAGATGTAACCAATATTACTAAGATCCTGATGCCTA



TGCTGTTGACAGTGAGCGCTTGGAACATCCATTTAACAAATAGTGAAGCCACAGATGTATTTGTTAAATGGATGTTCCAAATGCCTA  
TGCTGTTGACAGTGAGCGCACGAGTCTTGTTAGCCCTACATAGTGAAGCCACAGATGTATGTAGGGCTAACAAAGACTCGTTTGCCTA  
TGCTGTTGACAGTGAGCGACAGCCCTTAGGTAACCTCCAATAGTGAAGCCACAGATGTATTGGAGGTTACCTAAGGGCTGGTGCCTA  
TGCTGTTGACAGTGAGCGATAGTGGGTTCTATAAACTATATAGTGAAGCCACAGATGTATATAGTTTATAGAACCCACTAGTGCCTA  
TGCTGTTGACAGTGAGCGACAGGACCCTCGCAGACATTAATAGTGAAGCCACAGATGTATTAATGTCTGCGAGGGTCTGGTGCCTA  
TGCTGTTGACAGTGAGCGACAGGATAGAGGCACTCTACAATAGTGAAGCCACAGATGTATTGTAGAGTGCCTCTATCCTGGTGCCTA  
TGCTGTTGACAGTGAGCGCCTGGAAGAAATAGATTCCAAATAGTGAAGCCACAGATGTATTTGGAATCTATTTCTCCAGATGCCTA  
TGCTGTTGACAGTGAGCGCATGGTTGATCTTAAATCTGTATAGTGAAGCCACAGATGTATACAGATTTAAGATCAACCATTTGCCTA  
TGCTGTTGACAGTGAGCGACCTGCTGATCTTGATATCATATAGTGAAGCCACAGATGTATATGATATCAAGATCAGCAGGGTGCCTA  
TGCTGTTGACAGTGAGCGCCTGTTTCTGTATGAAGTATAATAGTGAAGCCACAGATGTATTACTTCATACAGAAACAGTTGCCTA  
TGCTGTTGACAGTGAGCGCCAGAAGCTGCTTGTACAGTAATAGTGAAGCCACAGATGTATTACTGTACAAGCAGCTTCTGTTGCCTA  
TGCTGTTGACAGTGAGCGCTAGGACTGAATTGGTGACAAAATAGTGAAGCCACAGATGTATTTGTCACCAATTCAGTCCATTGCCTA  
TGCTGTTGACAGTGAGCGAAAGGACCAGTAAGAAATACAATAGTGAAGCCACAGATGTATTGTATTTCTTACTGGTCCCTTCTGCCTA  
TGCTGTTGACAGTGAGCGCACCCAACTAATTTCCATTTAATAGTGAAGCCACAGATGTATTAATGGAAATAGTTGGGTATGCCTA  
TGCTGTTGACAGTGAGCGAAAGACGAACATTCATCTTATATAGTGAAGCCACAGATGTATATAAGATGAATGTTTCGTCTTCTGCCTA  
TGCTGTTGACAGTGAGCGATAGCCCTTGATAGTCAATAATAGTGAAGCCACAGATGTATTATGACTATCCAAGGGCTACTGCCTA  
TGCTGTTGACAGTGAGCGCTTGGTTGTGCCTATAGAATATATAGTGAAGCCACAGATGTATAAATCTATAGGCACAACCAATTGCCTA  
TGCTGTTGACAGTGAGCGCCGGCATTCTACTATAAATTTATAGTGAAGCCACAGATGTATAAATTTATAGTAGAAATGCCGTTGCCTA  
TGCTGTTGACAGTGAGCGCCACGAGCATCTTAATTTCTTATAGTGAAGCCACAGATGTATAAGAAATTAAGATGCTCGTGATGCCTA  
TGCTGTTGACAGTGAGCGAACCAGGTTGATAACAAGCAATAGTGAAGCCACAGATGTATTGCTTGTATCAACCTGGGTCTGCCTA  
TGCTGTTGACAGTGAGCGACAGGTTGATAACAAGCAATTTATAGTGAAGCCACAGATGTATAAATTTGCTTGTATCAACCTGGTGCCTA  
TGCTGTTGACAGTGAGCGCAACCATGAGTCTAGCACTCAATAGTGAAGCCACAGATGTATTGAGTGCTAGACTCATGGTTTTGCCTA  
TGCTGTTGACAGTGAGCGAAAGGTCTACGATACTCTTAAATAGTGAAGCCACAGATGTATTTAAGAGTATCGTAGACCTTGTGCCTA  
TGCTGTTGACAGTGAGCGCCTGAAGGATCTTCGAAGACAATAGTGAAGCCACAGATGTATTGCTTTCGAAGATCCCTCAGTTGCCTA  
TGCTGTTGACAGTGAGCGCAACAGTGAATTTCTCCAGTTATAGTGAAGCCACAGATGTATAACTGGAGAATTTCACTGTTTTGCCTA  
TGCTGTTGACAGTGAGCGCCACGAAGTCCCTCAATAATCTATAGTGAAGCCACAGATGTATAGATTATTGAGGACTTCGTGATGCCTA  
TGCTGTTGACAGTGAGCGCCAGGAATTAAGTGAATATAGTGAAGCCACAGATGTATATCACTTAAGTAATTCCTGTTGCCTA  
TGCTGTTGACAGTGAGCGCCAGGAAGGTTTATGTGACAAAATAGTGAAGCCACAGATGTATTTGTCACATAAACCTTCCTGATGCCTA  
TGCTGTTGACAGTGAGCGCTCGGCTCTCATTTCGAACCTTATAGTGAAGCCACAGATGTATAAAGTTCGAATGAGAGCCGATTGCCTA  
TGCTGTTGACAGTGAGCGCCAGCAAGAGGTTTATGCAGAATAGTGAAGCCACAGATGTATTCGCATAAACCTCTTGCTGATGCCTA  
TGCTGTTGACAGTGAGCGCCGAGTAATGAAGAAATACAATAGTGAAGCCACAGATGTATTGTATTTCTTCACTTACTGCGTTGCCTA  
TGCTGTTGACAGTGAGCGAACCATGTTCTTGACATTGAATAGTGAAGCCACAGATGTATTCATGTCAAGAACATGGGTCTGCCTA  
TGCTGTTGACAGTGAGCGCCAGATGAATCATAAAGGTAATAGTGAAGCCACAGATGTATTTACCTTTATGATTCATCTGTTGCCTA

TGCTGTTGACAGTGAGCGAATGGTAACTTTATCAAGGAATAGTGAAGCCACAGATGTATTCCTTGATAAAGTTAACCATGTGCCTA  
TGCTGTTGACAGTGAGCGCCTGAAGCTAGATGAAAGTAAATAGTGAAGCCACAGATGTATTTACTTTCATCTAGCTTCAGATGCCTA  
TGCTGTTGACAGTGAGCGACTGGAGGACCTTATTAATCAATAGTGAAGCCACAGATGTATTGATTAATAAGGTCCCTCCAGCTGCCTA  
TGCTGTTGACAGTGAGCGAAACGATGTATTGACAAAGCAATAGTGAAGCCACAGATGTATTGCTTTGTCAATACATCGTTGTGCCTA  
TGCTGTTGACAGTGAGCGACTCGCAAGGATCCCAGAACAATAGTGAAGCCACAGATGTATTGTTCTGGGATCCTTGCGAGGTGCCTA  
TGCTGTTGACAGTGAGCGACCGTTTCATCGTGGCACTCAATAGTGAAGCCACAGATGTATTGAGTGCCACGATGAAACGGCTGCCTA  
TGCTGTTGACAGTGAGCGAAAGTAATTCACAGAGACATATAGTGAAGCCACAGATGTATATGTCTCTGTGAATTACCTTCTGCCTA  
TGCTGTTGACAGTGAGCGCCAGAGACATAAAGCCGGAGAATAGTGAAGCCACAGATGTATTCCTCCGGCTTTATGTCTCTGTTGCCTA  
TGCTGTTGACAGTGAGCGCTCCCAGGAACCTAGAACTCAATAGTGAAGCCACAGATGTATTGAGTTCAGGTTCCCTGGGAATGCCTA  
TGCTGTTGACAGTGAGCGCTTCAATTTGTCAAATGTTGAATAGTGAAGCCACAGATGTATTCACATTTGACAAATTGAAATGCCTA  
TGCTGTTGACAGTGAGCGATAGGGATTTCAATGAAGATTATAGTGAAGCCACAGATGTATAATCTTCAATGAAATCCCTAGTGCCTA  
TGCTGTTGACAGTGAGCGCCTGCAGTTAAGCAATGTATAATAGTGAAGCCACAGATGTATTATACATTGCTTAACTGCAGTTGCCTA  
TGCTGTTGACAGTGAGCGACTGCACTATATTCTCAATTTATAGTGAAGCCACAGATGTATAAATTGAGAATATAGTGCAGGTGCCTA  
TGCTGTTGACAGTGAGCGACCGATGGTAGTTTGAATGTAATAGTGAAGCCACAGATGTATTACATTCAAACTACCATCGGCTGCCTA  
TGCTGTTGACAGTGAGCGCCTCCGTCAAGTGACAAAGAAATAGTGAAGCCACAGATGTATTTCTTTGTCACTTGACGGAGATGCCTA  
TGCTGTTGACAGTGAGCGAAAGCGAAACTCCAAAGTGAATAGTGAAGCCACAGATGTATTCACTTTGGAGTTTCCGCTTCTGCCTA  
TGCTGTTGACAGTGAGCGCTTCCGCAGTGATATTGTATAATAGTGAAGCCACAGATGTATTATACAATATCACTGCGGAAATGCCTA  
TGCTGTTGACAGTGAGCGCAAAGGGTAGACTTGTAAATAAATAGTGAAGCCACAGATGTATTTATTACAAGTCTACCCCTTTATGCCTA  
TGCTGTTGACAGTGAGCGCCAAGATATTGTATACAAATATAGTGAAGCCACAGATGTATAAATTGTATACAATATCTTGATGCCTA  
TGCTGTTGACAGTGAGCGACAGATTGGATCGGAAAGTAAATAGTGAAGCCACAGATGTATTTACTTTCCGATCCAATCTGCTGCCTA  
TGCTGTTGACAGTGAGCGCCTGGTTAGGACTGTTAAGGAATAGTGAAGCCACAGATGTATTCCTTAACAGTCTTAACCAGATGCCTA  
TGCTGTTGACAGTGAGCGCTAGTTTGTAAATCTCAATTAATAGTGAAGCCACAGATGTATTAATTGAGATTAACAACTATTGCCTA  
TGCTGTTGACAGTGAGCGACAAGGCAAATATAGTGTAAATAGTGAAGCCACAGATGTATTAAACACTATATTTGCCTTGGTGCCTA  
TGCTGTTGACAGTGAGCGCCAAGTGAATTTCAAATTTAATAGTGAAGCCACAGATGTATTAATTTGAAATTCACTTGTGCCTA  
TGCTGTTGACAGTGAGCGATCGAATGGTACATGCCATCAATAGTGAAGCCACAGATGTATTGATGGCATGTACCATTGAGTGCCTA  
TGCTGTTGACAGTGAGCGAACCATTCGACTCTTCAGCTAATAGTGAAGCCACAGATGTATTAGCTGAAGAGTCGAATGGTGTGCCTA  
TGCTGTTGACAGTGAGCGCAGGGAAGGTGGTATTGATACATAGTGAAGCCACAGATGTATGTATCAATACCACCTTCCCTTTGCCTA  
TGCTGTTGACAGTGAGCGACAGCATATGGATGTAACGGAATAGTGAAGCCACAGATGTATTCGTTACATCCATATGCTGCTGCCTA  
TGCTGTTGACAGTGAGCGAAACGGAGGATTCGACAATTTATAGTGAAGCCACAGATGTATAAATTGTCGAATCCTCCGTTCTGCCTA  
TGCTGTTGACAGTGAGCGACAGGTACAGTCTTCAACTCAATAGTGAAGCCACAGATGTATTGAGTTGAAGACTGTACCTGGTGCCTA  
TGCTGTTGACAGTGAGCGACAGGCTATATTGCATCTGCAATAGTGAAGCCACAGATGTATTGCAGATGCAATATAGCCTGGTGCCTA  
TGCTGTTGACAGTGAGCGCTAGCATAATGACAATTTATAGTGAAGCCACAGATGTATAAATAAATTGTCATTATGCTAATGCCTA  
TGCTGTTGACAGTGAGCGCCCCATGTTTCTTCCAACCTTATAGTGAAGCCACAGATGTATAAGTTGGAAGAAACAATGGGATGCCTA

TGCTGTTGACAGTGAGCGCTAGGGTGATGTCTCACTTGAATAGTGAAGCCACAGATGTATTCAAGTGAGACATCACCCATTGCCTA  
TGCTGTTGACAGTGAGCGACCCGAAGGTAATCATTGCCAATAGTGAAGCCACAGATGTATTGGCAATGATTACCTTCGGGGTGCCTA  
TGCTGTTGACAGTGAGCGACCCGAAGGTAATCATTGCCAAAATAGTGAAGCCACAGATGTATTTGGCAATGATTACCTTCGGGGTGCCTA  
TGCTGTTGACAGTGAGCGACAGATTATTTGGATCACATTATAGTGAAGCCACAGATGTATAATGTGATCCAAATAATCTGGTGCCTA  
TGCTGTTGACAGTGAGCGCCACAGAGTACCGCTTATTTAATAGTGAAGCCACAGATGTATTAATAAGCGGTACTCTGTGTTGCCTA  
TGCTGTTGACAGTGAGCGCCAAGAGGATTTCAAAGATGGATAGTGAAGCCACAGATGTATCCATCTTTGAAATCCTCTTGATGCCTA  
TGCTGTTGACAGTGAGCGCTACCAACTGTTACATTTATAATAGTGAAGCCACAGATGTATTATAAATGTAACAGTTGGTAATGCCTA  
TGCTGTTGACAGTGAGCGCCAGCCCAAGAAATCTAAGAAATAGTGAAGCCACAGATGTATTTCTTAGATTTCTTGGGCTGATGCCTA  
TGCTGTTGACAGTGAGCGACCCGGAAGCCCTACACTATTATAGTGAAGCCACAGATGTATAAATAGTGTAGGGCTTCGGGGTGCCTA  
TGCTGTTGACAGTGAGCGACCCGGGCGAAAGACTAACCAATAGTGAAGCCACAGATGTATTGGTTAGTCTTTGCCCCGGGCTGCCTA  
TGCTGTTGACAGTGAGCGAAACCTGCCTGATTATCATAAAATAGTGAAGCCACAGATGTATTTATGATAATCAGGCAGGTTCTGCCTA  
TGCTGTTGACAGTGAGCGCCACCATGTTTACAACTGTTATAGTGAAGCCACAGATGTATAACAGTTTGTAAACATGGTGTGCCTA  
TGCTGTTGACAGTGAGCGCAAGCTGTGACTGTAAGAAATATAGTGAAGCCACAGATGTATATTTCTTACAGTCACAGCTTATGCCTA  
TGCTGTTGACAGTGAGCGATCCCTGATTACTATAAGATTATAGTGAAGCCACAGATGTATAATCTTATAGTAATCAGGGAGTGCCTA  
TGCTGTTGACAGTGAGCGCCCCATGGATATGGGAACAATATAGTGAAGCCACAGATGTATATGTTCCCATATCCATGGGTTGCCTA  
TGCTGTTGACAGTGAGCGCCACTATGTTTACAAATGTTATAGTGAAGCCACAGATGTATAACAATTTGTAAACATAGTGTGCCTA  
TGCTGTTGACAGTGAGCGACACAATCAAGTCTAAACTAGATAGTGAAGCCACAGATGTATCTAGTTTAGACTTGATTGTGCTGCCTA  
TGCTGTTGACAGTGAGCGACTAAGTCTAGATATCAACAAAATAGTGAAGCCACAGATGTATTTGTTGATATCTAGACTTAGCTGCCTA  
TGCTGTTGACAGTGAGCGACATGGGCTACATGCTCTTCAATAGTGAAGCCACAGATGTATTGAAGAGCATGTAGCCCATGGTGCCTA  
TGCTGTTGACAGTGAGCGCCAGGATAGAAATCCCATTCAATAGTGAAGCCACAGATGTATTGAATGGGATTTCTATCCTGTTGCCTA  
TGCTGTTGACAGTGAGCGCCAGAGCTATGACATCAGTATTTAGTGAAGCCACAGATGTAAATACTGATGTCATAGCTCTGTTGCCTA  
TGCTGTTGACAGTGAGCGCCAGGAAGCACCTATAATCTCATAGTGAAGCCACAGATGTATGAGATTATAGGTGCTTCCTGTTGCCTA  
TGCTGTTGACAGTGAGCGCCAACCTGATTCCCTTAGCTAATAGTGAAGCCACAGATGTATTAGCTAAGGGAATCAGGTTGTTGCCTA  
TGCTGTTGACAGTGAGCGATAGGCTCAATCTTGTGCCCTATAGTGAAGCCACAGATGTATAGGGCACAAAGATTGAGCCTACTGCCTA  
TGCTGTTGACAGTGAGCGCATAGTAATATTTGAGCATTATAGTGAAGCCACAGATGTATAAATGCTCAAATATTACTATATGCCTA  
TGCTGTTGACAGTGAGCGCCTGGCACATCATTCTATATTTTGTATAGTGAAGCCACAGATGTAAAAATAGAAATGATGTGCCAGTTGCCTA  
TGCTGTTGACAGTGAGCGACACATCATTCTATATTTTGTATAGTGAAGCCACAGATGTATACGAAATATAGAATGATGTGCTGCCTA  
TGCTGTTGACAGTGAGCGAATCAGCATATGTTGTCACCAATAGTGAAGCCACAGATGTATTGGTGACAACATATGCTGATGTGCCTA  
TGCTGTTGACAGTGAGCGCCACTCTATGCTTTGCAAGTAATAGTGAAGCCACAGATGTATTACTTGCAAAGCATAGAGTGTGCCTA  
TGCTGTTGACAGTGAGCGCTACGTCAAGTCCCAAAGTTGAATAGTGAAGCCACAGATGTATTCAACTTTGGGACTGACGTAATGCCTA  
TGCTGTTGACAGTGAGCGATCCCAAAGTTGAAATCTACAATAGTGAAGCCACAGATGTATTGTAGATTTCACTTTGGGACTGCCTA  
TGCTGTTGACAGTGAGCGACCCAGTGGTCTATGTCACAAAATAGTGAAGCCACAGATGTATTTGTGACATAGACCACTGGGGTGCCTA  
TGCTGTTGACAGTGAGCGCCTCGTGTTTACCGATAAAATAATAGTGAAGCCACAGATGTATTATTTATCGGTAAACACGAGATGCCTA

TGCTGTTGACAGTGAGCGCCTGATTCCTTTGAGCAAGTAATAGTGAAGCCACAGATGTATTACTTGCTCAAAGGAATCAGTTGCCTA  
TGCTGTTGACAGTGAGCGCAACCATAACCTTTCAGATTAATAGTGAAGCCACAGATGTATTAATCTGAAAGGTTATGGTTTTGCCTA  
TGCTGTTGACAGTGAGCGCATGGAATTAGACTAAGTAATATAGTGAAGCCACAGATGTATATTACTTAGTCTAATTCATTTGCCTA  
TGCTGTTGACAGTGAGCGATAGTATCAGAATGTCATCCAATAGTGAAGCCACAGATGTATTGGATGACATTCTGATACTACTGCCTA  
TGCTGTTGACAGTGAGCGCTCCAACGTATATTTACTTTATAGTGAAGCCACAGATGTATAAAGTAAATATACAGTTGGATTGCCTA  
TGCTGTTGACAGTGAGCGAAAGCCCTTCTTTGGGAATATATAGTGAAGCCACAGATGTATATATTCCAAAGAAGGGCTTGTGCCTA  
TGCTGTTGACAGTGAGCGCTACCGTCACTTTCAAGGAATATAGTGAAGCCACAGATGTATATTCCTTGAAAGTGACGGTAATGCCTA  
TGCTGTTGACAGTGAGCGACTGCTTGAATGTAAATATTAATAGTGAAGCCACAGATGTATTAATATTTACATTCAAGCAGGTGCCTA  
TGCTGTTGACAGTGAGCGATCCCATGAGCATTGTGGCTTATAGTGAAGCCACAGATGTATAAGCCACAATGCTCATGGGACTGCCTA  
TGCTGTTGACAGTGAGCGCTTGATAGCGTATGCATATAATAGTGAAGCCACAGATGTATTATATGCATACGCTATCCAAATGCCTA  
TGCTGTTGACAGTGAGCGATGGTATCAATTTGTTATTAATAGTGAAGCCACAGATGTATTTAATAACAAATTGATACCACTGCCTA  
TGCTGTTGACAGTGAGCGCCTGGGTGATCCATCAACATTATAGTGAAGCCACAGATGTATAATGTTGATGGATCACCCAGTTGCCTA  
TGCTGTTGACAGTGAGCGATAACACTTTAGCATAACATCAATAGTGAAGCCACAGATGTATTGATGTATGCTAAAGTGGTAGTGCCTA  
TGCTGTTGACAGTGAGCGCTGGGATGAGTTGATCATTATATAGTGAAGCCACAGATGTATATAATGATCAACTCATCCCATTGCCTA  
TGCTGTTGACAGTGAGCGATCAACTGATTGTGATCATTAATAGTGAAGCCACAGATGTATTAATGATCACAATCAGTTGACTGCCTA  
TGCTGTTGACAGTGAGCGCAACAGACATTATGTCATTCTATAGTGAAGCCACAGATGTATAGAATGACATAATGTCTGTTTTGCCTA  
TGCTGTTGACAGTGAGCGATTGGTAGGGCTTAGAAAGGAATAGTGAAGCCACAGATGTATTCCTTTCTAAGCCCTACCAAGTGCCTA  
TGCTGTTGACAGTGAGCGCGAGCTATTTAAGAACGTATTATAGTGAAGCCACAGATGTATAATACGTTCTTAAATAGCTCTTGCCTA  
TGCTGTTGACAGTGAGCGCCAGGGTGAAGTCTGTTGTGACATAGTGAAGCCACAGATGTATGTACAACAGACTCACCCCTGTTGCCTA  
TGCTGTTGACAGTGAGCGCTTGCCTAATTACCAAGTCAAATAGTGAAGCCACAGATGTATTTGACTTGGAATTAGGCAAATGCCTA  
TGCTGTTGACAGTGAGCGCGCCGTGGGTCTTTACTATGAATAGTGAAGCCACAGATGTATTCATAGTAAAGACCCACGGCATGCCTA  
TGCTGTTGACAGTGAGCGCCAAGGGCAGGATGACTTCTAATAGTGAAGCCACAGATGTATTAGAAGTCATCCTGCCCTTGTGCCTA  
TGCTGTTGACAGTGAGCGAAAGGGCAGGATGACTTCTAAATAGTGAAGCCACAGATGTATTTAGAAGTCATCCTGCCCTTGTGCCTA  
TGCTGTTGACAGTGAGCGACAGGATGACTTCTAAACTATAGTGAAGCCACAGATGTATAGTGTTTAGAAGTCATCCTGCTGCCTA  
TGCTGTTGACAGTGAGCGCTGGGACTAAATGCCTGTACAATAGTGAAGCCACAGATGTATTGTACAGGCATTTAGTCCCATTGCCTA  
TGCTGTTGACAGTGAGCGACACGTGGTTCTCATCTGGTAATAGTGAAGCCACAGATGTATTACCAGATGAGAACCACGTGGTGCCTA  
TGCTGTTGACAGTGAGCGAACGCATGGAATATCTCGTGAATAGTGAAGCCACAGATGTATTCACGAGATATTCATGCGTCTGCCTA  
TGCTGTTGACAGTGAGCGCCACGGACCAAGGATTCCTTAATAGTGAAGCCACAGATGTATTAAGAATCCTTGGTCCGTGTTGCCTA  
TGCTGTTGACAGTGAGCGCAAATATGTTATTTAAGAGAAATAGTGAAGCCACAGATGTATTTCTCTTAAATAACATATTTATGCCTA  
TGCTGTTGACAGTGAGCGCCCCAGTGAAGAGGTTAATACATAGTGAAGCCACAGATGTATGTATTAACCTCTTCACTGGGATGCCTA  
TGCTGTTGACAGTGAGCGACAGGAGCAAACGTGCACAGAGATAGTGAAGCCACAGATGTATCTCTGTGCAGTTTGTCTCTGCTGCCTA  
TGCTGTTGACAGTGAGCGCCTGCACGAGTTCCGACTTGAATAGTGAAGCCACAGATGTATTCAGTCCGAACTCGTGCAGTTGCCTA  
TGCTGTTGACAGTGAGCGCTGCCGTCATTCTGTTGTGGAATAGTGAAGCCACAGATGTATTCACAACAGAATGACGGCATTGCCTA

TGCTGTTGACAGTGAGCGCATCATATGGGATGTCTAGTAAATAGTGAAGCCACAGATGTATTTACTGACATCCCATATGATATGCCTA  
TGCTGTTGACAGTGAGCGACGGATCTATAATACCCAGAAAATAGTGAAGCCACAGATGTATTTCTGGGTATTATAGATCCGCTGCCTA  
TGCTGTTGACAGTGAGCGACACTTATGTGTTCTCCAGAAAATAGTGAAGCCACAGATGTATTTCTGGAGAACACATAAAGTGGTGCCTA  
TGCTGTTGACAGTGAGCGAACGGATGGCTATTGCACATTTTAGTGAAGCCACAGATGTAAAAATGTGCAATAGCCATCCGTGTGCCTA  
TGCTGTTGACAGTGAGCGACTCAGAATAGATCTAAGTCAATAGTGAAGCCACAGATGTATTGACTTAGATCTATTCTGAGGTGCCTA  
TGCTGTTGACAGTGAGCGACAGGAGACATACAGTATTTAATAGTGAAGCCACAGATGTATTAATACTGTATGTCTCTGGTGCCTA  
TGCTGTTGACAGTGAGCGCAACCATTGCTACCTCATTAATAGTGAAGCCACAGATGTATTTAATGAGGTAGCAATGGTTATGCCTA  
TGCTGTTGACAGTGAGCGCTTGATCATCTTGTTATTCAATAGTGAAGCCACAGATGTATTGAATAACAAGATGATCCAAATGCCTA  
TGCTGTTGACAGTGAGCGAAAGGAATATTCCAATCCTGAATAGTGAAGCCACAGATGTATTCAGGATTGGAATATTCCTTCTGCCTA  
TGCTGTTGACAGTGAGCGATACGATCAGCTGAACCAAGAATAGTGAAGCCACAGATGTATTCCTGGTTCAGCTGATCGTACTGCCTA  
TGCTGTTGACAGTGAGCGCACCGAACGACTTATCCGGAAAATAGTGAAGCCACAGATGTATTTCCGGATAAGTCGTTCCGGTATGCCTA  
TGCTGTTGACAGTGAGCGAAAGGCTATCTTTGGTCATATTTAGTGAAGCCACAGATGTAAATATGACCAAAGATAGCCTTGTGCCTA  
TGCTGTTGACAGTGAGCGAAACCATCACGATTTAATGTTATAGTGAAGCCACAGATGTATAACATTAATCGTGATGGTTCTGCCTA  
TGCTGTTGACAGTGAGCGATGGGATGAAATTATCCCGAATAGTGAAGCCACAGATGTATTCGGGAATAATTTTCATCCCAGTGCCTA  
TGCTGTTGACAGTGAGCGAAAGGTTTCATCAAGGCTTATAATAGTGAAGCCACAGATGTATTATAAGCCTTGATGAACCTTCTGCCTA  
TGCTGTTGACAGTGAGCGATTGGTAGAAGTTACAAATATTAGTGAAGCCACAGATGTAAATAATTTGTAACCTTCTACCAACTGCCTA  
TGCTGTTGACAGTGAGCGCAACCTGTTGACTAAACAGTAATAGTGAAGCCACAGATGTATTACTGTTTAGTCAACAGGTTTTGCCTA  
TGCTGTTGACAGTGAGCGCCTGGACCAGGTCGGAAACGAATAGTGAAGCCACAGATGTATTCGTTTCCGACCTGGTCCAGTGCCTA  
TGCTGTTGACAGTGAGCGCTAACATCATGATGGACCTTAATAGTGAAGCCACAGATGTATTAAGGTCCATCATGATGTTAATGCCTA  
TGCTGTTGACAGTGAGCGCCACGGATGTGCAGAACATGAATAGTGAAGCCACAGATGTATTCATGTTCTGCACATCCGTGTTGCCTA  
TGCTGTTGACAGTGAGCGACCCGGCCTTTAGGAACCTTCTATAGTGAAGCCACAGATGTATAGAAGTTTCTAAAGCCGGGCTGCCTA  
TGCTGTTGACAGTGAGCGCATCGGTTGTACATATAAAATTTATAGTGAAGCCACAGATGTATAAATTTATATGTACAACCGATATGCCTA  
TGCTGTTGACAGTGAGCGCTCGGTTGTACATATAAAATTTATAGTGAAGCCACAGATGTAAATAATTTATATGTACAACCGATTGCCTA  
TGCTGTTGACAGTGAGCGAAAGGGCCACGTTCACTATTTATAGTGAAGCCACAGATGTATAAATAGTGAACGTGGCCCTTCTGCCTA  
TGCTGTTGACAGTGAGCGAAAGATGCTTAAGAACCTGAAATAGTGAAGCCACAGATGTATTTAGGTTCTTAAGCATCTTCTGCCTA  
TGCTGTTGACAGTGAGCGAAAGGTTATAAAATATGAACGTATAGTGAAGCCACAGATGTATACGTTTCATATTTATAACCTTCTGCCTA  
TGCTGTTGACAGTGAGCGACAAGACAGGCTCAATGTCTAATAGTGAAGCCACAGATGTATTAGACATTGAGCCTGTCTTGGTGCCTA  
TGCTGTTGACAGTGAGCGAAAGCTGAAGGACGATAAAACAATAGTGAAGCCACAGATGTATTGTTTATCGTCTTCAGCTTCTGCCTA  
TGCTGTTGACAGTGAGCGCTAGCTACAAGATCGACTACAATAGTGAAGCCACAGATGTATTGTAGTCGATCTTGTAGCTATTGCCTA  
TGCTGTTGACAGTGAGCGCCCCGAGATACATGATCCTAAATAGTGAAGCCACAGATGTATTTAGGATCATGTATCTCGGGTTGCCTA  
TGCTGTTGACAGTGAGCGAAAACATGTTTGTCTTGATAAATAGTGAAGCCACAGATGTATTTATCAAGACAAACATGTTTGTGCCTA  
TGCTGTTGACAGTGAGCGATAGGAAATTGACATCCCATAAATAGTGAAGCCACAGATGTATTATGGGATGTCAATTTCTAGTGCCTA  
TGCTGTTGACAGTGAGCGCAAGACTCTATAACCGTATTGAATAGTGAAGCCACAGATGTATTCATACGGTATAGAGTCTTTTGCCTA

TGCTGTTGACAGTGAGCGCCCAGAGCAATTCTAAACTATATAGTGAAGCCACAGATGTATATAGTTTAGAATTGCTCTGGTTGCCTA  
TGCTGTTGACAGTGAGCGCTACGTTTGGGTTATAAATTATTAGTGAAGCCACAGATGTAATAATTTATAACCCAAACGTATTGCCTA  
TGCTGTTGACAGTGAGCGCCAGGGATTAGTTAACAGTACATAGTGAAGCCACAGATGTATGTACTGTTAACTAATCCCTGATGCCTA  
TGCTGTTGACAGTGAGCGAACCCATGAAAGCAATGAGTAATAGTGAAGCCACAGATGTATTACTCATTGCTTTCATGGGTGTGCCTA  
TGCTGTTGACAGTGAGCGAAAGATCCTGAATATAAACCAATAGTGAAGCCACAGATGTATTGGTTTATATTCAGGATCTTCTGCCTA  
TGCTGTTGACAGTGAGCGACAGGTCCTTCATCACCCACAATAGTGAAGCCACAGATGTATTGTGGGTGATGAAGGACCTGCTGCCTA  
TGCTGTTGACAGTGAGCGACAAGGACAGAGTAATGATAAATAGTGAAGCCACAGATGTATTTATCATTACTCTGCCTTGGTGCCTA  
TGCTGTTGACAGTGAGCGACCCAGTAATACTGGAGGACAATAGTGAAGCCACAGATGTATTGTCTCCAGTATTACTGGGGTGCCTA  
TGCTGTTGACAGTGAGCGCCACAATGATGGAGCTACGAAATAGTGAAGCCACAGATGTATTTCTGAGCTCCATCATTGTGTTGCCTA  
TGCTGTTGACAGTGAGCGACTGAATAGTAAGAATAACTTATAGTGAAGCCACAGATGTATAAGTTATTCTTACTATTTCAGCTGCCTA  
TGCTGTTGACAGTGAGCGACAGCCTTTAAGCTCAAAGAAATAGTGAAGCCACAGATGTATTTCTTTGAGCTTAAAGGCTGCTGCCTA  
TGCTGTTGACAGTGAGCGACCGGATCCCTGTCAATCAATAATAGTGAAGCCACAGATGTATTATTGATGACAGGGATCCGGGTGCCTA  
TGCTGTTGACAGTGAGCGCCAGGGTAATTATAGCAACTCATAGTGAAGCCACAGATGTATGAGTTGCTATAAATTACCCTGATGCCTA  
TGCTGTTGACAGTGAGCGCCTGGTCCCTCATTGATAAGTTATAGTGAAGCCACAGATGTATAACTTATCAATGAGGACCAGTTGCCTA  
TGCTGTTGACAGTGAGCGCCACCTATAATTTACAGATCAATAGTGAAGCCACAGATGTATTGATCTGTAAATTATAGGTGTTGCCTA  
TGCTGTTGACAGTGAGCGCAACCTTAGATCTTGTCAATTAATAGTGAAGCCACAGATGTATTAATGACAAGATCTAAGGTTTTGCCTA  
TGCTGTTGACAGTGAGCGCCCCACATTCCTTAGTAATGAATAGTGAAGCCACAGATGTATTCATTACTAAGGAATGTGGGTTGCCTA  
TGCTGTTGACAGTGAGCGCAAGGCAAATCGTGTTACTATATAGTGAAGCCACAGATGTATATAGTAACACGATTTGCCTTTTGCCTA  
TGCTGTTGACAGTGAGCGCCAGGTAATAAACTCCAACAAATAGTGAAGCCACAGATGTATTTGTTGGAGTTTATTACCTGTTGCCTA  
TGCTGTTGACAGTGAGCGACACATTAGAATTGACCTTAAATAGTGAAGCCACAGATGTATTTAAGGTCAATTCATATGTGCTGCCTA  
TGCTGTTGACAGTGAGCGCTAGGGATGTAGCACTAATAAATAGTGAAGCCACAGATGTATTTATTAGTGTACATCCCTAATGCCTA  
TGCTGTTGACAGTGAGCGCCTGCATGAATGCTAACTTCAATAGTGAAGCCACAGATGTATTGAAGTTAGCATTCATGCAGATGCCTA  
TGCTGTTGACAGTGAGCGACTGGTTGCCTATGCTAAGAAATAGTGAAGCCACAGATGTATTTCTTAGCATAGGCAACCAGGTGCCTA  
TGCTGTTGACAGTGAGCGAAGGGATGAATACTATCATTTATAGTGAAGCCACAGATGTATAAATGATAGTATTTCATCCCTGTGCCTA  
TGCTGTTGACAGTGAGCGCATGGACCTTCTACCATCAAATAGTGAAGCCACAGATGTATTTGATGGTAGAAAGTCCATATGCCTA  
TGCTGTTGACAGTGAGCGAAAGGCGTGTATACATATCTTATAGTGAAGCCACAGATGTATAAGATATGTATACACGCCTTGTGCCTA  
TGCTGTTGACAGTGAGCGAAAGGAACAGATTCAAATAAGATAGTGAAGCCACAGATGTATCTTATTTGAATCTGTTCCCTTCTGCCTA  
TGCTGTTGACAGTGAGCGCCAGGGTGACATGGTACAGCAATAGTGAAGCCACAGATGTATTGCTGTACCATGTCACCCTGATGCCTA  
TGCTGTTGACAGTGAGCGCAAGGGCTAAGATAAACATGTATAGTGAAGCCACAGATGTATACATGTTTATCTTAGCCCTTATGCCTA  
TGCTGTTGACAGTGAGCGCAGGGCTAAGATAAACATGTAATAGTGAAGCCACAGATGTATTACATGTTTATCTTAGCCCTTGCCTA  
TGCTGTTGACAGTGAGCGATAAGATAAACATGTAATGTTATAGTGAAGCCACAGATGTATAACATTACATGTTTATCTTAGTGCCTA  
TGCTGTTGACAGTGAGCGAACCTATTTGTTTGGCGCTAAATAGTGAAGCCACAGATGTATTTAGCGGCAAACAAATAGGTCTGCCTA  
TGCTGTTGACAGTGAGCGCCTGTCGCAAACCGGACATCAATAGTGAAGCCACAGATGTATTGATGTCCGGTTTGCAGACAGATGCCTA

TGCTGTTGACAGTGAGCGATCAGAGCAAGACATATTGTAATAGTGAAGCCACAGATGTATTACAATATGTCTTGCTCTGAGTGCCTA  
TGCTGTTGACAGTGAGCGACGCCAGTGTAATCGCCATTATTAGTGAAGCCACAGATGTAATAATGGCGATTACACTGGCGCTGCCTA  
TGCTGTTGACAGTGAGCGACAGGAACGTAATGTACGCACATAGTGAAGCCACAGATGTATGTGCGTACATTACGTTCTGCTGCCTA  
TGCTGTTGACAGTGAGCGACAGGTTCAATAAGACGGTGCATAGTGAAGCCACAGATGTATGCACCGTCTTATTGAACCTGGTGCCTA  
TGCTGTTGACAGTGAGCGCAAGGCAGAGACTGACCACCTATAGTGAAGCCACAGATGTATAGGTGGTCAGTCTCTGCCTTATGCCTA  
TGCTGTTGACAGTGAGCGACACCAAGGATACCATCATTGATAGTGAAGCCACAGATGTATCAATGATGGTATCCTTGGTGGTGCCTA  
TGCTGTTGACAGTGAGCGAACCAAGGATACCATCATTGATTAGTGAAGCCACAGATGTAATCAATGATGGTATCCTTGGTGTGCCTA  
TGCTGTTGACAGTGAGCGCATGGTGTAATAGAGCTGTTATAGTGAAGCCACAGATGTATAACAGCTCTATTTACACCATATGCCTA  
TGCTGTTGACAGTGAGCGACAGAAATGGCAGACTCAAATATAGTGAAGCCACAGATGTATATTTGAGTCTGCCATTTCTGCTGCCTA  
TGCTGTTGACAGTGAGCGCATCATTGAGGCGGAAATCAAATAGTGAAGCCACAGATGTATTTGATTTCCGCCCTCAATGATATGCCTA  
TGCTGTTGACAGTGAGCGCCCCGAAGATCAACTCACCAAATAGTGAAGCCACAGATGTATTTGGTGAGTTGATCTTCGGGATGCCTA  
TGCTGTTGACAGTGAGCGATACACCTTTTCATGATGTGAAATAGTGAAGCCACAGATGTATTTACATCATGAAAGGTGTAAGTGCCTA  
TGCTGTTGACAGTGAGCGCAGCCATTGGCCTGGAGATTAATAGTGAAGCCACAGATGTATTAATCTCCAGGCCAATGGCTTTGCCTA  
TGCTGTTGACAGTGAGCGACAAGGTAATTGCAGTAATGAATAGTGAAGCCACAGATGTATTCATTAAGTCAATACCTTGGTGCCTA  
TGCTGTTGACAGTGAGCGCCTCGCGATTTCTTGAGTCTAATAGTGAAGCCACAGATGTATTAGACTCAAGAAATCGCGAGATGCCTA  
TGCTGTTGACAGTGAGCGACTGGTGCTAATTCCTCTCATATAGTGAAGCCACAGATGTATATGAGAGGAATTAGCACCAGCTGCCTA  
TGCTGTTGACAGTGAGCGCTAGCTGTTGAAGAAATATTAATAGTGAAGCCACAGATGTATTAATATTTCTTCAACAGCTATTGCCTA  
TGCTGTTGACAGTGAGCGACAGCCTCACGACAGGAAACAATAGTGAAGCCACAGATGTATTGTTTCTGCTGAGGCTGGTGCCTA  
TGCTGTTGACAGTGAGCGACTCTGATATTCTAATGCCAAATAGTGAAGCCACAGATGTATTTGGCATTAGAATATCAGAGCTGCCTA  
TGCTGTTGACAGTGAGCGAACAGAGTATCAGGATGATAAAATAGTGAAGCCACAGATGTATTTATCATCCTGATACTCTGTGTGCCTA  
TGCTGTTGACAGTGAGCGCAACGTCAATCCTGCCCGCAAATAGTGAAGCCACAGATGTATTTGCGGGCAGGATTGACGTTATGCCTA  
TGCTGTTGACAGTGAGCGCCCCGACGGAGCATTGAAGACATTAGTGAAGCCACAGATGTAATGTCTTCAATGCTCCGTCGGTTGCCTA  
TGCTGTTGACAGTGAGCGCAGAAATATTGATAAAGTACTATAGTGAAGCCACAGATGTATAGTACTTTATCAATATTTCTATGCCTA  
TGCTGTTGACAGTGAGCGCCTGAGGATGACCAAGAGACAATAGTGAAGCCACAGATGTATTGTCTCTTGGTCATCCTCAGTTGCCTA  
TGCTGTTGACAGTGAGCGCTAGAAAATGAATCACCATAAGATAGTGAAGCCACAGATGTATCTTATGGTGATTCATTTCTAATGCCTA  
TGCTGTTGACAGTGAGCGCAAGATGAAAGTCTTTCTTAGATAGTGAAGCCACAGATGTATCTAGGAAAGACTTTCATCTTATGCCTA  
TGCTGTTGACAGTGAGCGCCCCGGAGAAGCTTAACAACATAGTGAAGCCACAGATGTATAGTTGTTAAGCTTCTCCGGGTTGCCTA  
TGCTGTTGACAGTGAGCGCCACGAGTGTATATTTGTGAATAGTGAAGCCACAGATGTATTCACAAATATAACACTCGTGTGCCTA  
TGCTGTTGACAGTGAGCGCCTCCATGGTCAGCAACATCAATAGTGAAGCCACAGATGTATTGATGTTGCTGACCATGGAGTTGCCTA  
TGCTGTTGACAGTGAGCGCCTCGGCCTTCATGGGTAACAATAGTGAAGCCACAGATGTATTGTTACCCATGAAGGCCGAGATGCCTA  
TGCTGTTGACAGTGAGCGCCACAGGAACAATGAAATCTGTAGTGAAGCCACAGATGTACAAGATTTTATTGTTCTGTGTGCCTA  
TGCTGTTGACAGTGAGCGACTCAGGAACACGGAAGGTGAATAGTGAAGCCACAGATGTATTCACCTTCCGTGTTCTGAGGTGCCTA  
TGCTGTTGACAGTGAGCGAAACACGGAAGGTGAACCTGATTAGTGAAGCCACAGATGTAATCAAGTTCACCTTCCGTGTTCTGCCTA

TGCTGTTGACAGTGAGCGCCCTGCCAGATCCATAGCAAATAGTGAAGCCACAGATGTATTTGCTATGGATCTGGGCAGGTTGCCTA  
TGCTGTTGACAGTGAGCGACTGCCAGATCCATAGCAAATTAGTGAAGCCACAGATGTAATTTGCTATGGATCTGGGCAGGTTGCCTA  
TGCTGTTGACAGTGAGCGACCGAAGGCGAAATGAACACAATAGTGAAGCCACAGATGTATTTGTGTTCAATTTCGCCTTCGGCTGCCTA  
TGCTGTTGACAGTGAGCGCCAACCCATAACTGCTGTCAAATAGTGAAGCCACAGATGTATTTGACAGCAGTTATGGGTTGATGCCTA  
TGCTGTTGACAGTGAGCGCCCCATAACTGCTGTCAAACAATAGTGAAGCCACAGATGTATTTGTTGACAGCAGTTATGGGTTGCCTA  
TGCTGTTGACAGTGAGCGCAGCAAACCTTGTAAGTGAATAGTGAAGCCACAGATGTATTTCACTTTACAAGGTTTGCTTTGCCTA  
TGCTGTTGACAGTGAGCGCCAGCCTCAAGGAAGATCATAATAGTGAAGCCACAGATGTATTATGATCTTCCTTGAGGCTGTTGCCTA  
TGCTGTTGACAGTGAGCGACTGGATCTAGAGGCATTATAATAGTGAAGCCACAGATGTATTATAATGCCTCTAGATCCAGCTGCCTA  
TGCTGTTGACAGTGAGCGCAAAGATCATGCTTTACGGTTATAGTGAAGCCACAGATGTATAACCGTAAAGCATGATCTTTATGCCTA  
TGCTGTTGACAGTGAGCGCAGGCGATTTGATACTTTCCAATAGTGAAGCCACAGATGTATTGAAAGTATCAAATCGCCTATGCCTA  
TGCTGTTGACAGTGAGCGCTAGAAGTAATGTATCTTGCTATAGTGAAGCCACAGATGTATAGCAAGATACATTACTTCTATTGCCTA  
TGCTGTTGACAGTGAGCGCCCCGAGTTCTGTGACAGTTTATAGTGAAGCCACAGATGTATAAACTGTCACAGAAGTGCAGGTTGCCTA  
TGCTGTTGACAGTGAGCGCCAGGCTGAAACCAAGTAGAATAGTGAAGCCACAGATGTATTTACTTGGTTTCCAGCCTGTTGCCTA  
TGCTGTTGACAGTGAGCGACTCCGGGATATTATGAAGTTATAGTGAAGCCACAGATGTATAACTTCATAATATCCCGGAGCTGCCTA  
TGCTGTTGACAGTGAGCGCCAGGTAATGTATCTGCTATAGTGAAGCCACAGATGTATTTCTAGACACATAGTACCTGTTGCCTA  
TGCTGTTGACAGTGAGCGACAGTTTGTAAATCTCAATTAATAGTGAAGCCACAGATGTATTAATTGAGATTAACAAACTGGTGCCTA  
TGCTGTTGACAGTGAGCGAACAAGTGAATTTCAAATTTATAGTGAAGCCACAGATGTATAAATTTGAAATTACACTTGTGTGCCTA  
TGCTGTTGACAGTGAGCGAAGCAAACATATTGAATTTAAATAGTGAAGCCACAGATGTATTTAAATTCATATGTTGCTCTGCCTA  
TGCTGTTGACAGTGAGCGAAAGCAGGATTGCTGCATGAAATAGTGAAGCCACAGATGTATTTTATGCAGCAATCTGCTTGTGCCTA  
TGCTGTTGACAGTGAGCGACAATGGATATTTCTTAAATAATAGTGAAGCCACAGATGTATTATTTAAGAAATATCCATTGCTGCCTA  
TGCTGTTGACAGTGAGCGCAACGAAGAATGGGAACCTATATAGTGAAGCCACAGATGTATATAGGTTCCCATTTCTCGTTTTGCCTA  
TGCTGTTGACAGTGAGCGAGACGGTGATTGAGATGTTTAAATAGTGAAGCCACAGATGTATTAACATCTCAATCACCGTCTGCCTA  
TGCTGTTGACAGTGAGCGAACCCTTGATCTTCGAGTGCAATAGTGAAGCCACAGATGTATTGCACTCGAAGATCAAGGGTGTGCCTA  
TGCTGTTGACAGTGAGCGAAGGAGATATAATCCTGGAGAATAGTGAAGCCACAGATGTATTTCCAGGATTATATCTCCTGTGCCTA  
TGCTGTTGACAGTGAGCGAAAGGTATCCTTATGCTGTATAGTGAAGCCACAGATGTATAACAGCATAAGGATCACCTTCTGCCTA  
TGCTGTTGACAGTGAGCGACAACATCAATGCCGTAGATAATAGTGAAGCCACAGATGTATTATCTACGGCATTGATGTTGGTGCCTA  
TGCTGTTGACAGTGAGCGATTTCGATTTAGATAACAAGGATTAGTGAAGCCACAGATGTAATCCTTGTTATCTAAATCGAAGTGCCTA  
TGCTGTTGACAGTGAGCGACAACATCAGCCGATTCATTAATAGTGAAGCCACAGATGTATTAATGAATCGGCTGATGTTGCTGCCTA  
TGCTGTTGACAGTGAGCGAGTCGATCTAAATAAGATGAAATAGTGAAGCCACAGATGTATTTTATCTTATTTAGATCGACGTGCCTA  
TGCTGTTGACAGTGAGCGCTCGAAAGATCTTGATTCCTAATAGTGAAGCCACAGATGTATTAGGAATCAAGATCTTTCGATTGCCTA  
TGCTGTTGACAGTGAGCGCAAGATCTTGATTCCTAAGCTATAGTGAAGCCACAGATGTATAGCTTAGGAATCAAGATCTTTTGCCTA  
TGCTGTTGACAGTGAGCGCCAGGCCATACTTCAAACAATATAGTGAAGCCACAGATGTATATTGTTTGAAGTATGGCCTGATGCCTA  
TGCTGTTGACAGTGAGCGACTGGATTAAGTTTGATAAATATAGTGAAGCCACAGATGTATATTTATCAAACCTTAATCCAGGTTGCCTA



TGCTGTTGACAGTGAGCGCCTGAAGTATTTGAACAAGAAATAGTGAAGCCACAGATGTATTTCTTGTTCAAATACTTCAGATGCCTA  
TGCTGTTGACAGTGAGCGAATCACTTGTATAACTAAATAGTGAAGCCACAGATGTATTTAGTGTATAACAAGTGATGTGCCTA  
TGCTGTTGACAGTGAGCGACTGAGGGATAATAGATTACAATAGTGAAGCCACAGATGTATTGTAATCTATTATCCCTCAGGTGCCTA  
TGCTGTTGACAGTGAGCGCAAGGTTGATTACTTATAAATATAGTGAAGCCACAGATGTATATTATAAGTAATCAACCTTATGCCTA  
TGCTGTTGACAGTGAGCGCCAGCACTACGTCTTCCTTAAATAGTGAAGCCACAGATGTATTTAAGGAAGACGTAGTGCTGATGCCTA  
TGCTGTTGACAGTGAGCGACACTACGTCTTCCTTAAATAATAGTGAAGCCACAGATGTATTATTAAAGGAAGACGTAGTGCTGCCTA  
TGCTGTTGACAGTGAGCGCCAGGAGCTGTGAATGATTCTATAGTGAAGCCACAGATGTATAGAATCATTACAGCTCCTGATGCCTA  
TGCTGTTGACAGTGAGCGCCCCGCAAATGTCAGCAATTGATAGTGAAGCCACAGATGTATCAATTGCTGACATTTGCGGGTTGCCTA  
TGCTGTTGACAGTGAGCGACCGGAGGATGACTACGAAGAATAGTGAAGCCACAGATGTATTCCTCGTAGTCATCCTCCGGGTGCCTA  
TGCTGTTGACAGTGAGCGACAGAACAGAGGTACATTATAATAGTGAAGCCACAGATGTATTATAATGTACCTCTGTTCTGCTGCCTA  
TGCTGTTGACAGTGAGCGCCAGAGGTACATTATAAAGTCATAGTGAAGCCACAGATGTATGACTTTATAATGTACCTCTGTTGCCTA  
TGCTGTTGACAGTGAGCGACTGCGGCTTAATTGCCAGTAATAGTGAAGCCACAGATGTATTACTGGCAATTAAGCCGAGGTGCCTA  
TGCTGTTGACAGTGAGCGATGCGGCTTAATTGCCAGTAAATAGTGAAGCCACAGATGTATTTACTGGCAATTAAGCCGAGTGCCTA  
TGCTGTTGACAGTGAGCGCCAGGATGGCACTTTCATTGAATAGTGAAGCCACAGATGTATTCAAATGAAAGTGCCATCCTGATGCCTA  
TGCTGTTGACAGTGAGCGCCTCGGTGTCAAACACCAATAATAGTGAAGCCACAGATGTATTATTGGTGTGTTGACACCGAGATGCCTA  
TGCTGTTGACAGTGAGCGCAACCATGTTTACAACATCAATAGTGAAGCCACAGATGTATTGATAGTTGTAAACATGGTTATGCCTA  
TGCTGTTGACAGTGAGCGACAGCTTCTGTTCAACTTGAATAGTGAAGCCACAGATGTATTCAAGTTGAACAGAAAGCTGCTGCCTA  
TGCTGTTGACAGTGAGCGCCAGGATAGGCATCTTTCGCTAATAGTGAAGCCACAGATGTATTAGCAAAGATGCCTATCCTGTTGCCTA  
TGCTGTTGACAGTGAGCGAACCTGGATGCCTTAAGATTATAGTGAAGCCACAGATGTATAATCTTAAGGCATCCAGGGTGTGCCTA  
TGCTGTTGACAGTGAGCGACCGGCAAGACCGGAAACAAATAGTGAAGCCACAGATGTATTTGTTTCCCGTCTTGCCGGCTGCCTA  
TGCTGTTGACAGTGAGCGCTAGGTCTAATTTATACCAAGATAGTGAAGCCACAGATGTATCTTGGTATAAATTAGACCTATTGCCTA  
TGCTGTTGACAGTGAGCGCACCAAGAATCAGGTAGAATAATAGTGAAGCCACAGATGTATTATTCTACCTGATCTTGGTATGCCTA  
TGCTGTTGACAGTGAGCGCCTGGGTAAATACACAGAAATATAGTGAAGCCACAGATGTATATTCTGTGTATTAACCCAGTTGCCTA  
TGCTGTTGACAGTGAGCGAAGCGCTATGTATACTGCATAATAGTGAAGCCACAGATGTATTATGCAGTATACATAGCGCTCTGCCTA  
TGCTGTTGACAGTGAGCGCATGGGAGATATTTGTGTAATATAGTGAAGCCACAGATGTATATTACACAAATATCTCCATTTGCCTA  
TGCTGTTGACAGTGAGCGCTGGGAGATATTTGTGTAATAATAGTGAAGCCACAGATGTATTATTACACAAATATCTCCATTGCCTA  
TGCTGTTGACAGTGAGCGCCCGCTGGATTGAAGATGTTAATAGTGAAGCCACAGATGTATTAACATCTTCAATCCAGCGGATGCCTA  
TGCTGTTGACAGTGAGCGAAACAAGGGTTCAGGGAACAAATAGTGAAGCCACAGATGTATTTGTTCCCTGAACCTTGTGTGCCTA  
TGCTGTTGACAGTGAGCGCTTCATCTGTAAGTGTATAGTGAAGCCACAGATGTATAACACTTCAAGTACAGATGAATTGCCTA  
TGCTGTTGACAGTGAGCGACACCCTTGTATAGACACCTATAGTGAAGCCACAGATGTATAGGTGTCTATACAAAGGGTGGTGCCTA  
TGCTGTTGACAGTGAGCGAAAGTATATTGTCAAGTGTAAATAGTGAAGCCACAGATGTATTAACACTTGAACAATACTTCTGCCTA  
TGCTGTTGACAGTGAGCGACACAAGCGATGGGTAACTTATAGTGAAGCCACAGATGTATAAGTTAACCATCGCTTGTGCTGCCTA  
TGCTGTTGACAGTGAGCGAAAGCGATGGGTAACTTAGAATAGTGAAGCCACAGATGTATTCAGTTAACCATCGCTTGTGCTGCCTA

TGCTGTTGACAGTGAGCGCCTGTCTATCAAGTCTAGAAATAGTGAAGCCACAGATGTATTTCTAGACTTGATAGGACAGTTGCCTA  
TGCTGTTGACAGTGAGCGAAAAGGGAGATGTCTTACACATTAGTGAAGCCACAGATGTAATGTGTAAGACATCTCCCTTTCTGCCTA  
TGCTGTTGACAGTGAGCGACCGTCAGGGACCAGAACTGTATAGTGAAGCCACAGATGTATACAGTTCTGGTCCCTGACGGGTGCCTA  
TGCTGTTGACAGTGAGCGAATCAGGGACCAGACTGTTAATAGTGAAGCCACAGATGTATTAACAGTCTGGTCCCTGATGTGCCTA  
TGCTGTTGACAGTGAGCGAAAAGGTGAGGATTTATTTGAATAGTGAAGCCACAGATGTATTCAAATAAATCCTCACCTTTGTGCCTA  
TGCTGTTGACAGTGAGCGCATCCGTAGAATCAAACGGAAAATAGTGAAGCCACAGATGTATTTCCGTTTTGATTCTACGGATATGCCTA  
TGCTGTTGACAGTGAGCGCCTGGACAGTGCCAATGAGAAAATAGTGAAGCCACAGATGTATTTCTCATTGGCACTGTCCAGTTGCCTA  
TGCTGTTGACAGTGAGCGCTTGAATTAGGGCAAATCTTAATAGTGAAGCCACAGATGTATTAAGATTTGCCCTAATTCAATTGCCTA  
TGCTGTTGACAGTGAGCGCCAGTCTCATGTCAGGCATTAATAGTGAAGCCACAGATGTATTAATGCCTGACATGAGACTGTTGCCTA  
TGCTGTTGACAGTGAGCGCCTCAGACGATTTACACGGAAAATAGTGAAGCCACAGATGTATTTCCGTGTAATCGTCTGAGATGCCTA  
TGCTGTTGACAGTGAGCGCCCCGGTGCTTTCTAACCTACCATAGTGAAGCCACAGATGTATGGTAGGTTAGAAAGCACCGGATGCCTA  
TGCTGTTGACAGTGAGCGACAGAAGATCCTGACTGGATTATAGTGAAGCCACAGATGTATAATCCAGTCAGGATCTTCTGGTGCCTA  
TGCTGTTGACAGTGAGCGACTCGGTGGAGACTCTTCTATAGTGAAGCCACAGATGTATAGAAGAGTGTCTCCACCGAGCTGCCTA  
TGCTGTTGACAGTGAGCGAGCCCAGCTCTTTAATATGTAATAGTGAAGCCACAGATGTATTACATATTAAGAGCTGGGCCTGCCTA  
TGCTGTTGACAGTGAGCGACAGCTCTTTAATATGTAAGAATAGTGAAGCCACAGATGTATTTCTTACATATTAAGAGCTGGTGCCTA  
TGCTGTTGACAGTGAGCGCCAGGACTCTAAATATTCCTAATAGTGAAGCCACAGATGTATTAGGAATATTTAGAGTCTCTGATGCCTA  
TGCTGTTGACAGTGAGCGAAAAGAAGCTATTGATTCTGAATAGTGAAGCCACAGATGTATTCAGAATCAATAGCTTCTTTGTGCCTA  
TGCTGTTGACAGTGAGCGCCTGGTGGATAAGCTCAATAAAATAGTGAAGCCACAGATGTATTTATTGAGCTTATCCACCAGATGCCTA  
TGCTGTTGACAGTGAGCGAAACAAGTACATTCTCTGCTTATAGTGAAGCCACAGATGTATAAGCAGAGAATGTACTTGTGTGCCTA  
TGCTGTTGACAGTGAGCGCAACAGTGCATCTGTAGTCATATAGTGAAGCCACAGATGTATATGACTACAGATGCACTGTTTTGCCTA  
TGCTGTTGACAGTGAGCGCTCCGTGTTGAATATTCATCTATAGTGAAGCCACAGATGTATAGATGAATATTTCAACACGGAATGCCTA  
TGCTGTTGACAGTGAGCGATAGTATTTGAGAAGTATAATATAGTGAAGCCACAGATGTATATATACTTCTCAAATACTAGTGCCTA  
TGCTGTTGACAGTGAGCGCCCAGAAGCTATTTGAAACTAATAGTGAAGCCACAGATGTATTAGTTTTCAAATAGCTTCTGGATGCCTA  
TGCTGTTGACAGTGAGCGCAAGTTATAATGTGGTGCTTAATAGTGAAGCCACAGATGTATTAAGCACCACATTATAAATTATGCCTA  
TGCTGTTGACAGTGAGCGCCCCGAGGTACCTGAATGACTTATAGTGAAGCCACAGATGTATAAGTCATTCAGGTACCTCGGATGCCTA  
TGCTGTTGACAGTGAGCGCCACCTCTAACATGAGCTCAAATAGTGAAGCCACAGATGTATTTGAGCTCATGTTAGAGGTGATGCCTA  
TGCTGTTGACAGTGAGCGATTGGTAGATACTGCTCCAATATAGTGAAGCCACAGATGTATATGGAGCAGTATCTACCAAGTGCCTA  
TGCTGTTGACAGTGAGCGCTCCCTGTGGGTTAGCACTTAATAGTGAAGCCACAGATGTATTAAGTGCTAACCCACAGGGAATGCCTA  
TGCTGTTGACAGTGAGCGCAACCCTTGTGACTCAATATATAGTGAAGCCACAGATGTATAATATTGAGTCACAAGGGTTATGCCTA  
TGCTGTTGACAGTGAGCGATGCGTTCTATTTCGCCAGATATAGTGAAGCCACAGATGTATATCTGGGCGAATAGAACGCAGTGCCTA  
TGCTGTTGACAGTGAGCGCCAGCCCTTCCAACATGACCAATAGTGAAGCCACAGATGTATTGGTCATGTTGGAAGGGCTGATGCCTA  
TGCTGTTGACAGTGAGCGCCATGACCAACCAGAACACTAATAGTGAAGCCACAGATGTATTAGTGTCTGGTTGGTCATGTTGCCTA  
TGCTGTTGACAGTGAGCGACACCCATCTTGGGCAAACAAAATAGTGAAGCCACAGATGTATTTGTTTGCCCAAGATGGGTGGTGCCTA

TGCTGTTGACAGTGAGCGCTTGATGTACTCATTACAGCGATAGTGAAGCCACAGATGTATCGCTGAATGAGTACATCCAATTGCCTA  
TGCTGTTGACAGTGAGCGACAGGCATTGCATGGAGAAACATAGTGAAGCCACAGATGTATGTTTCTCCATGCAATGCCTGCTGCCTA  
TGCTGTTGACAGTGAGCGATACCTCCAGAACAATAAACATTAGTGAAGCCACAGATGTAATGTTTATTGTTCTGGAGGTAGTGCCTA  
TGCTGTTGACAGTGAGCGACTCCGTGACGTAGGCAGGAAATAGTGAAGCCACAGATGTATTTCTGCCTACGTACGGAGGTGCCTA  
TGCTGTTGACAGTGAGCGCAGCCAGAGATTGGCAGCATAATAGTGAAGCCACAGATGTATTATGCTGCCAATCTCTGGCTATGCCTA  
TGCTGTTGACAGTGAGCGACACAGCCTTCATAGTGTCTTTAGTGAAGCCACAGATGTAAAGGACACTATGAAGGCTGTGGTGCCTA  
TGCTGTTGACAGTGAGCGAACCCTGAAATAAAGATTTCATAGTGAAGCCACAGATGTATGAATCTTTATTTCCAGTGGTCTGCCTA  
TGCTGTTGACAGTGAGCGCCCACTGAAATAAAGATTCAATAGTGAAGCCACAGATGTATTGAATCTTTATTTCCAGTGGTTGCCTA  
TGCTGTTGACAGTGAGCGATACGATCAATAAGACCAGATATAGTGAAGCCACAGATGTATATCTGGTCTTATTGATCGTAGTGCCTA  
TGCTGTTGACAGTGAGCGCACGATCAATAAGACCAGATAATAGTGAAGCCACAGATGTATTATCTGGTCTTATTGATCGTAGTGCCTA  
TGCTGTTGACAGTGAGCGCTCCCAATGAGTTGCCATATAATAGTGAAGCCACAGATGTATTATATGGCAACTCATTTGGGAATGCCTA  
TGCTGTTGACAGTGAGCGAAAGGACAATAGTGGTGAGAAATAGTGAAGCCACAGATGTATTTCTCACCCTATTGTCCTTGTGCCTA  
TGCTGTTGACAGTGAGCGCAAGCCGATCTATTAAGAAATAGTGAAGCCACAGATGTATTTCTTTAATAGATCCGGCTTTTGCCTA  
TGCTGTTGACAGTGAGCGACTGGCATTGACTCATAGCCTATAGTGAAGCCACAGATGTATAGGCTATGAGTCAATGCCAGGTGCCTA  
TGCTGTTGACAGTGAGCGATCCCTGGGCTGTGATCGATTATAGTGAAGCCACAGATGTATAATCGATCACAGCCCAGGGAGTGCCTA  
TGCTGTTGACAGTGAGCGACCCGGTGTGGACATATGAAATAGTGAAGCCACAGATGTATTTCATATGTCCAACACCCGGGCTGCCTA  
TGCTGTTGACAGTGAGCGCGAGGAACTTCCCTATAGTGAATAGTGAAGCCACAGATGTATTCACTATAGGGAAGTTCCTCATGCCTA  
TGCTGTTGACAGTGAGCGCCCATATGTGGTCTAGAAATTATAGTGAAGCCACAGATGTATAATTCTAGAACCACATATGGTTGCCTA  
TGCTGTTGACAGTGAGCGACAGGAACTCCTAGCACTGAAATAGTGAAGCCACAGATGTATTTCACTGCTAGGAGTTCCTGCTGCCTA  
TGCTGTTGACAGTGAGCGACACAGTTGCATGAACATATCATAGTGAAGCCACAGATGTATGATATGTTTCATGCAACTGTGCTGCCTA  
TGCTGTTGACAGTGAGCGACAGCAGAGGATCCACCAGTTATAGTGAAGCCACAGATGTATAACTGGTGGATCCTCTGCTGCTGCCTA  
TGCTGTTGACAGTGAGCGACTCGCTGTCTGTAGGCGTCAATAGTGAAGCCACAGATGTATTGACGCCTACAGACAGCGAGGTGCCTA  
TGCTGTTGACAGTGAGCGCCGGCCTCGGAACCAACTTAATAGTGAAGCCACAGATGTATTAAGTTGGGTTCCGAGGCCGTTGCCTA  
TGCTGTTGACAGTGAGCGACTGGGCAAGATCCTTACCAAATAGTGAAGCCACAGATGTATTTGGTAAGGATCTTGCCCAGCTGCCTA  
TGCTGTTGACAGTGAGCGACCCGGGAAGGCTCTACAGAAATAGTGAAGCCACAGATGTATTTCTGTAGAGCCTTCCGGGGTGCCTA  
TGCTGTTGACAGTGAGCGCCACGTTTCATGCTGAAGCACCATAGTGAAGCCACAGATGTATGGTGCTTCAGCATGAACGTGTTGCCTA  
TGCTGTTGACAGTGAGCGCCTCCGTAGCCATCACAGCTAATAGTGAAGCCACAGATGTATTAGCTGTGATGGCTACGGAGTTGCCTA  
TGCTGTTGACAGTGAGCGCTTGGTGTTGATGAACAACTATAGTGAAGCCACAGATGTATAGTTGTTTCATCAAACACCAATTGCCTA  
TGCTGTTGACAGTGAGCGCGAGGATGACCCTAGTGTATTATAGTGAAGCCACAGATGTATAATACACTAGGGTTCATCCTCATGCCTA  
TGCTGTTGACAGTGAGCGACAGGTGCTTATTTAAGTACAATAGTGAAGCCACAGATGTATTGTAATAAATAAGCACCTGGTGCCTA  
TGCTGTTGACAGTGAGCGACAGGTCAGCATATTTAATAAATAGTGAAGCCACAGATGTATTTATTAATATGCTGACCTGCTGCCTA  
TGCTGTTGACAGTGAGCGCCTTCGGCAACTTCTCAATAAATAGTGAAGCCACAGATGTATTTATTGAGAAGTTGCCGAAGTTGCCTA  
TGCTGTTGACAGTGAGCGAAACCTGAAGTTGCGCTACAAATAGTGAAGCCACAGATGTATTTGTAGCGCAACTTCAGGTTGTGCCTA

TGCTGTTGACAGTGAGCGCCAGGCCTCCATCGACCACTTATAGTGAAGCCACAGATGTATAAGTGGTCGATGGAGCCTGATGCCTA  
TGCTGTTGACAGTGAGCGACCGGGACACCATGCAGATCATTAGTGAAGCCACAGATGTAATGATCTGCATGGTGTCCCGGGTGCCTA  
TGCTGTTGACAGTGAGCGAACCCATAAACCCTATTCTTAATAGTGAAGCCACAGATGTATTAAGAATAGTGGTTATGGGTGTGCCTA  
TGCTGTTGACAGTGAGCGACACACTGATGCCTATCTGCAATAGTGAAGCCACAGATGTATTGCAGATAGGCATCAGTGTGGTGCCTA  
TGCTGTTGACAGTGAGCGACACAGAAGGGATATTTGACTATAGTGAAGCCACAGATGTATAGTCAAATATCCCTTCTGTGGTGCCTA  
TGCTGTTGACAGTGAGCGAATCCAATGTGTTCCCTTTAATATAGTGAAGCCACAGATGTATATTAAGGAACACATTGGATCTGCCTA  
TGCTGTTGACAGTGAGCGAACTCCAGTTGTTCTTAATAAATAGTGAAGCCACAGATGTATTTATTAAGAACAACCTGGAGTGTGCCTA  
TGCTGTTGACAGTGAGCGACAGCGCATACTAATTCATGAATAGTGAAGCCACAGATGTATTCATGAATTAGTATGCGCTGCTGCCTA  
TGCTGTTGACAGTGAGCGACACGTTTCATGTAGCAATGGAATAGTGAAGCCACAGATGTATTCATTGCTACATGAACGTGGTGCCTA  
TGCTGTTGACAGTGAGCGCCAGGTAATAGGCAAAGATTTATAGTGAAGCCACAGATGTATAAATCTTTGCCCTATTACCTGTTGCCTA  
TGCTGTTGACAGTGAGCGCAAAGTCATTATTTGAGTATAATAGTGAAGCCACAGATGTATTATACTCAAATAATGACTTTATGCCTA  
TGCTGTTGACAGTGAGCGCAAGATATGTGATCACAAACAATAGTGAAGCCACAGATGTATTGTTGTGATCACATATCTTTTGCCTA  
TGCTGTTGACAGTGAGCGCCCCGTCGAAATTAGTAAAGAATAGTGAAGCCACAGATGTATTCCTTACTAATTTCCGACGGTTGCCTA  
TGCTGTTGACAGTGAGCGCTTGAAAATACTTAATAGTAGATAGTGAAGCCACAGATGTATCTACTATTAAGTATTTCCAATTGCCTA  
TGCTGTTGACAGTGAGCGACCGCTAATCAGGGAGTTAAATAGTGAAGCCACAGATGTATTTAACTCCCTGATTAGCCGGCTGCCTA  
TGCTGTTGACAGTGAGCGCCCCCTATAGAATCTGAAGTTAATAGTGAAGCCACAGATGTATTAACCTCAGATTCCTATAGGGATGCCTA  
TGCTGTTGACAGTGAGCGCCTGGGTAAAGTCAATCTAAGATAGTGAAGCCACAGATGTATCTTAGATTGACTTAACCCAGATGCCTA  
TGCTGTTGACAGTGAGCGAATGGCGGAAGCTAGTTACTAATAAGTGAAGCCACAGATGTATTAGTAACTAGCTTCCGCCATCTGCCTA  
TGCTGTTGACAGTGAGCGATACAGGCGAATCTGTGAGTAAATAGTGAAGCCACAGATGTATTACTGACAGATTCGCTGTAGTGCCTA  
TGCTGTTGACAGTGAGCGATACATTGAGGTGGAGAATGAATAGTGAAGCCACAGATGTATTCATCTCCACCTCAATGTACTGCCTA  
TGCTGTTGACAGTGAGCGCTCAGGATATCCCTATAAGTTATAGTGAAGCCACAGATGTATAACTTATAGGGATATCCTGATTGCCTA  
TGCTGTTGACAGTGAGCGCTTCCAAGACTTTCATACTCAATAGTGAAGCCACAGATGTATTGAGTATGAAAGTCTTGGAAATTGCCTA  
TGCTGTTGACAGTGAGCGATATGATAAGAATGCTATTAATAAGTGAAGCCACAGATGTATTTAATAGCATTCTTATCATAGTGCCTA  
TGCTGTTGACAGTGAGCGCCAGGTTGGCCATATAAAGAGATAGTGAAGCCACAGATGTATCTCTTTATATGGCCAACCTGATGCCTA  
TGCTGTTGACAGTGAGCGAAGGAAGTAATATGGACAAGAATAGTGAAGCCACAGATGTATTCCTGTCCATATTACTTCTCTGCCTA  
TGCTGTTGACAGTGAGCGCACCAAGAAAACGTTAAAGGAAAATAGTGAAGCCACAGATGTATTTCCCTTTAACGTTTCTTGGTATGCCTA  
TGCTGTTGACAGTGAGCGCCTGCATAAGACTATGCAATAATAGTGAAGCCACAGATGTATTATTGCATAGTCTTATGCAGTTGCCTA  
TGCTGTTGACAGTGAGCGCCAGACACTTGTAAATCTCTATAGTGAAGCCACAGATGTATAGAGATTTAACAAGTGTCTGATGCCTA  
TGCTGTTGACAGTGAGCGACAGGAACTAGAGACAACAGTATAGTGAAGCCACAGATGTATACTGTTGTCTCTAGTTCCTGGTGCCTA  
TGCTGTTGACAGTGAGCGCAGGGCATAGATTAGTCTTTAATAGTGAAGCCACAGATGTATTAAGACTAATCTATGCCCTTTGCCTA  
TGCTGTTGACAGTGAGCGCCTGGATGACAATAATCCCTTATAGTGAAGCCACAGATGTATAAGGGATTATTGTCAATCCAGTTGCCTA  
TGCTGTTGACAGTGAGCGCCAGCTCGAAACTTATTTCTTATAGTGAAGCCACAGATGTATAAGAAAATAAGTTTCGAGCTGATGCCTA  
TGCTGTTGACAGTGAGCGAAAGATTTGTTCCCTAAATTTAATAGTGAAGCCACAGATGTATTAATTTAGGAACAAATCTTGTGCCTA

TGCTGTTGACAGTGAGCGCACCAGATACCTTGAACCCAATAGTGAAGCCACAGATGTATTGGGTTTCAAGGTATCTGGTTTGCCTA  
TGCTGTTGACAGTGAGCGCATGCCTGATTTAGATCTTAAATAGTGAAGCCACAGATGTATTTAAGATCTAAATCAGGCATTTGCCTA  
TGCTGTTGACAGTGAGCGAATGGAGGATGATAGCATAGAATAGTGAAGCCACAGATGTATTCATGCTATCATCCTCCATGTGCCTA  
TGCTGTTGACAGTGAGCGCAAAGTAGATGTTCTAATGTAATAGTGAAGCCACAGATGTATTACATTAGAACATCTACTTTTTGCCTA  
TGCTGTTGACAGTGAGCGACCGCAGTGAGATTATGAATTATAGTGAAGCCACAGATGTATAATTCATAATCTCACTGCGGCTGCCTA  
TGCTGTTGACAGTGAGCGATACGTGGTATTTATAGCACAATAGTGAAGCCACAGATGTATTGTGCTATAAATACCACGTAGTGCCTA  
TGCTGTTGACAGTGAGCGCTTCGCTTGTGATGTCGATAAATAGTGAAGCCACAGATGTATTTATCGACATCACAAGCGAATTGCCTA  
TGCTGTTGACAGTGAGCGCCTGGAGCTATTCAATCAACTATAGTGAAGCCACAGATGTATAGTTGATTGAATAGCTCCAGTTGCCTA  
TGCTGTTGACAGTGAGCGCTTGGGAGTAATTGATTCTGAATAGTGAAGCCACAGATGTATTCAGAATCAATTACTCCCAATTGCCTA  
TGCTGTTGACAGTGAGCGAAACGATTGCCTTCGAGGAAATAGTGAAGCCACAGATGTATTTCCCTCGAAGGCAATCGTTCTGCCTA  
TGCTGTTGACAGTGAGCGATAGCTATGACTTAGTGCGTAATAGTGAAGCCACAGATGTATTACGCACTAAGTCATAGCTACTGCCTA  
TGCTGTTGACAGTGAGCGAATCACTGGAGTTACTCTATTATAGTGAAGCCACAGATGTATAATAGAGTAACTCCAGTGATCTGCCTA  
TGCTGTTGACAGTGAGCGCCTGGAGTTACTCTATTAECTATAGTGAAGCCACAGATGTATAGTTAATAGAGTAACTCCAGTTGCCTA  
TGCTGTTGACAGTGAGCGACAGCCTGATCTCCTCACCAATAGTGAAGCCACAGATGTATTGGTGAAGGAGATCAGGCTGGTGCCTA  
TGCTGTTGACAGTGAGCGACTGGGTTTCATGCTGTAATAAATAGTGAAGCCACAGATGTATTTATTACAGCATGAACCCAGGTGCCTA  
TGCTGTTGACAGTGAGCGCTCCAGAGAAGTTGGATCTAAATAGTGAAGCCACAGATGTATTTAGATCCAACCTCTCTGGAATGCCTA  
TGCTGTTGACAGTGAGCGAAACAGGTGGAATCATAACAAATAGTGAAGCCACAGATGTATTTGGTATGATTCCACCTGTTGTGCCTA  
TGCTGTTGACAGTGAGCGCCTCTTTGGTTATCATGAAGAATAGTGAAGCCACAGATGTATTCCTCATGATAACCAAAGATTGCCTA  
TGCTGTTGACAGTGAGCGCTAGTATGTGATTATAACAATATAGTGAAGCCACAGATGTATATGTTATAATCACATACTATTGCCTA  
TGCTGTTGACAGTGAGCGAAAGAATATGCTGGGCAAACAATAGTGAAGCCACAGATGTATTGTTTGCCAGCATATTCTTGTGCCTA  
TGCTGTTGACAGTGAGCGACAGCAAGTGACTGACCTCAAATAGTGAAGCCACAGATGTATTTGAGGTCAGTCACTTGCTGCTGCCTA  
TGCTGTTGACAGTGAGCGCCCCGGGATCCTTTGTGTCCAATAGTGAAGCCACAGATGTATTGGACACAAAGGATCCCGGGATGCCTA  
TGCTGTTGACAGTGAGCGCCAGGAGTAGACCGTCAGAATATAGTGAAGCCACAGATGTATATCTGACGGTCTACTCCTGATGCCTA  
TGCTGTTGACAGTGAGCGAATGAAATAACATCACACTTTATAGTGAAGCCACAGATGTATAAAGTGTGATGTTATTTTCATGTGCCTA  
TGCTGTTGACAGTGAGCGCAGGATAAAGAATTATCAATAATAGTGAAGCCACAGATGTATTAATGATAATCTTTATCCTATGCCTA  
TGCTGTTGACAGTGAGCGCCACCCAGGACATGCTATCTAATAGTGAAGCCACAGATGTATTAGATAGCATGTCCTGGGTGTTGCCTA  
TGCTGTTGACAGTGAGCGAATGCATATAACTTACACAATATAGTGAAGCCACAGATGTATATGTGTAAGTTATATGCATGTGCCTA  
TGCTGTTGACAGTGAGCGCCTGATTCATGTTGAAGTTGTATAGTGAAGCCACAGATGTATACAACCTCAACATGAATCAGTTGCCTA  
TGCTGTTGACAGTGAGCGCAAGAAGGATTACTTTCTTCAATAGTGAAGCCACAGATGTATTGAAGAAAGTAATCCTTCTTTTGCCTA  
TGCTGTTGACAGTGAGCGAAAGGTCGAACCTTACATTTATAGTGAAGCCACAGATGTATAAATGTGAAGGTTTCGACCTTCTGCCTA  
TGCTGTTGACAGTGAGCGCCAGACTCATACCAACCATGAATAGTGAAGCCACAGATGTATTCATGGTTGGTATGAGTCTGTTGCCTA  
TGCTGTTGACAGTGAGCGAACCTGCTACAAAGAAATTAATAGTGAAGCCACAGATGTATTAATTTCTTTGTAGCAGGGTCTGCCTA  
TGCTGTTGACAGTGAGCGACAGAAGGTTCTGCGTCAAATATAGTGAAGCCACAGATGTATATTTGACGCAGAACCTTCTGCTGCCTA

TGCTGTTGACAGTGAGCGAACCAATCATGAGGATAAGCTATAGTGAAGCCACAGATGTATAGCTTATCCTCATGATTGGTGTGCCTA  
TGCTGTTGACAGTGAGCGCAAGTTTGATCTCCAATATAAAATAGTGAAGCCACAGATGTATTTATATTGGAGATCAAACCTTTTGCCTA  
TGCTGTTGACAGTGAGCGCAAGGATTTACTTGAAAATGATTAGTGAAGCCACAGATGTAATCATTTCCAAGTAAATCCTTATGCCTA  
TGCTGTTGACAGTGAGCGACCGCACCATGATCGTTATGAATAGTGAAGCCACAGATGTATTCATAACGATCATGGTGCGGGTGCCTA  
TGCTGTTGACAGTGAGCGCCCGCTCCGTGTCAGAGATTTATAGTGAAGCCACAGATGTATAAATCTCTGACACGGAGCGGTTGCCTA  
TGCTGTTGACAGTGAGCGCCAAGTTATTCTTTATCAAATATAAGTGAAGCCACAGATGTATATTTGATAAAGAATAACTTGTGCCTA  
TGCTGTTGACAGTGAGCGCAACAAAGAATTTACTCTTGAATAGTGAAGCCACAGATGTATTCAGAGTAAATCTTTGTTTTGCCTA  
TGCTGTTGACAGTGAGCGCAACCTCCAAGATCAATATAAAATAGTGAAGCCACAGATGTATTTATATTGATCTTGGAGGTTTTGCCTA  
TGCTGTTGACAGTGAGCGACCGGATACAGTGAATTTGAATAGTGAAGCCACAGATGTATTCAAATTCAGTATCGCGGGTGCCTA  
TGCTGTTGACAGTGAGCGCCACGGAAGACATGGATCTATATAGTGAAGCCACAGATGTATATAGATCCATGTCTTCCGTGTTGCCTA  
TGCTGTTGACAGTGAGCGACCCACTGAAGTCAAATTTGAATAGTGAAGCCACAGATGTATTCAAATTTGACTTCAGTGGGGTGCCTA  
TGCTGTTGACAGTGAGCGACTGAAGAATGTCAAAGTGAATAGTGAAGCCACAGATGTATTCAGTTTGCATTCCTCAGCTGCCTA  
TGCTGTTGACAGTGAGCGACTGGTCAGTTTCCAACAGAATAGTGAAGCCACAGATGTATTCGTTTGGAAACTGACCAGGTGCCTA  
TGCTGTTGACAGTGAGCGACAGCCCGAACGCTATGAGCAATAGTGAAGCCACAGATGTATTGCTCATAGCGTTCGGGCTGCTGCCTA  
TGCTGTTGACAGTGAGCGACAGATCGTCATCACCAGAATAGTGAAGCCACAGATGTATTCCTTGGTGATGACGATCTGGCTGCCTA  
TGCTGTTGACAGTGAGCGACAGGTGACACCTTCACTTGAATAGTGAAGCCACAGATGTATTCAGTGAAGGTGTACCTGCTGCCTA  
TGCTGTTGACAGTGAGCGAACAGCTGATCTTAAATGACAATAGTGAAGCCACAGATGTATTGTCATTTAAGATCAGCTGTCTGCCTA  
TGCTGTTGACAGTGAGCGCCACGGAGGACATGGATCTCTATAGTGAAGCCACAGATGTATAGAGATCCATGTCTCCTGTTGCCTA  
TGCTGTTGACAGTGAGCGACAGAATCTACTCCAGAAGTAAATAGTGAAGCCACAGATGTATTACTTCTGGAGTAGATTCTGGTGCCTA  
TGCTGTTGACAGTGAGCGCTACACTTTAGATGAAGAGTTATAGTGAAGCCACAGATGTATAACTCTTCATCTAAAGTGTATTGCCTA  
TGCTGTTGACAGTGAGCGACCAAAGAATATTCTTAAATTTATAGTGAAGCCACAGATGTATAAATTTAGGAATATTCTTTGGGTGCCTA  
TGCTGTTGACAGTGAGCGCAGGGACTAGAGTTGTCACTTATAGTGAAGCCACAGATGTATAAGTGACAACCTTAGTCCCTATGCCTA  
TGCTGTTGACAGTGAGCGCAAGAACCAGGTTCCAACGGAATAGTGAAGCCACAGATGTATTCCGTTGGAACCTGGTTCTTTTGCCTA  
TGCTGTTGACAGTGAGCGACTGGGAACAATTCAAGACCTATAGTGAAGCCACAGATGTATAGGTCTTGAATTGTTCCAGGTGCCTA  
TGCTGTTGACAGTGAGCGACTGGTCAGTTCTAACTCTAATAGTGAAGCCACAGATGTATTAGGAGTTAGAAGTACCAGGTGCCTA  
TGCTGTTGACAGTGAGCGAAAGCCTCTGGATAACTGCTAATAGTGAAGCCACAGATGTATTAGCAGTTATCCAGAGGCTTGTGCCTA  
TGCTGTTGACAGTGAGCGCCAGCCTCTTGTAGTTATCCTATAGTGAAGCCACAGATGTATAGGATAACTACAAGAGGCTGATGCCTA  
TGCTGTTGACAGTGAGCGCAACCTGGAACATAGATGTATATAGTGAAGCCACAGATGTATATACATCTATGTTCCAGGTTATGCCTA  
TGCTGTTGACAGTGAGCGAAACAAGGAAATATAAGTAGATAGTGAAGCCACAGATGTATCTACTTATAAATTTCTTGTCTGCCTA  
TGCTGTTGACAGTGAGCGCCACCCTGTCATCCCTAAGAAATAGTGAAGCCACAGATGTATTTCTTAGGGATGACAGGGTGTGCCTA  
TGCTGTTGACAGTGAGCGAACCATCATAACTAGAATGATATAGTGAAGCCACAGATGTATATCATTCTAGTTATGATGGTCTGCCTA  
TGCTGTTGACAGTGAGCGCCTCGGTGTAGTCGGTGATAAAATAGTGAAGCCACAGATGTATTTATCACCGACTACACCGAGATGCCTA  
TGCTGTTGACAGTGAGCGAAAGGAAGTACATCCGATTGTATAGTGAAGCCACAGATGTATACAATCGGATGTACTTCTTCTGCCTA

TGCTGTTGACAGTGAGCGCCACCTCTTTATACCTGCTAATAGTGAAGCCACAGATGTATTAGCAGGTATAAAGAGGGTGTTCCTA  
TGCTGTTGACAGTGAGCGACTGCTACATGTACCTAAGCTATAGTGAAGCCACAGATGTATAGCTTAGGTACATGTAGCAGCTGCCTA  
TGCTGTTGACAGTGAGCGCCAGGGTGAATCAAGGAGTAAATAGTGAAGCCACAGATGTATTTACTCCTTGATTACCCTGATGCCTA  
TGCTGTTGACAGTGAGCGCCACGATGAACCACAAGAGCAATAGTGAAGCCACAGATGTATTGCTCTTGTGGTTCATCGTGATGCCTA  
TGCTGTTGACAGTGAGCGCAAGGAAATACCGGAACCAGAATAGTGAAGCCACAGATGTATTCTGGTTCGGTATTTCCCTTTGCCTA  
TGCTGTTGACAGTGAGCGCTACCTGGTTAATGTCACTATAGTGAAGCCACAGATGTATAGATGACATTAACCAGGTAATGCCTA  
TGCTGTTGACAGTGAGCGCAACCCTTTACCTATTTAATAATAGTGAAGCCACAGATGTATTATTAATAGGTAAAGGGTTTTGCCTA  
TGCTGTTGACAGTGAGCGCAACCGGCTCTTGGGAATGGTATAGTGAAGCCACAGATGTATACCATTCCAAGAGCCGGTTATGCCTA  
TGCTGTTGACAGTGAGCGCCACCTCAAATGAGCAGGTCAATAGTGAAGCCACAGATGTATTGACCTGCTCATTTGAGGTGATGCCTA  
TGCTGTTGACAGTGAGCGCCAAGAAGTTGATTGAGCGCAATAGTGAAGCCACAGATGTATTGCGCTCAATCAACTTCTTGATGCCTA  
TGCTGTTGACAGTGAGCGAAAGGAGCTTAAGGATCCTGATTAGTGAAGCCACAGATGTAATCAGGATCCTTAAGCTCCTTGTGCCTA  
TGCTGTTGACAGTGAGCGCTCCCGTGAATTGATCAATGATAGTGAAGCCACAGATGTATCATTTGATCAATTCACGGGAATGCCTA  
TGCTGTTGACAGTGAGCGCCAGAGACGTATTTAAATGGAATAGTGAAGCCACAGATGTATCCATTTAAATACGTCTCTGATGCCTA  
TGCTGTTGACAGTGAGCGACACAAAGGTGTTAGCTTGAAATAGTGAAGCCACAGATGTATTTCAAGCTAACACCTTTGTGGTGCCTA  
TGCTGTTGACAGTGAGCGCAACATTCGCTGTACAATCTTATAGTGAAGCCACAGATGTATAAGATTGTACAGCGAATGTTATGCCTA  
TGCTGTTGACAGTGAGCGCTGGGTCACTAATAGTCATTAATAGTGAAGCCACAGATGTATTAATGACTATTAGTGACCCAATGCCTA  
TGCTGTTGACAGTGAGCGCCACCCGGATGAAGAACATTGATAGTGAAGCCACAGATGTATCAATGTTCTTCATCCGGGTGATGCCTA  
TGCTGTTGACAGTGAGCGAAAGACCCGGAACCTCTGAGAAATAGTGAAGCCACAGATGTATTTCTCAGGAGTTCGGTCTTCTGCCTA  
TGCTGTTGACAGTGAGCGCACCGAAGTTACTGGTCCCAAATAGTGAAGCCACAGATGTATTTGGGACCAGTAACTTCGGTATGCCTA  
TGCTGTTGACAGTGAGCGCCAACCTCATCAATTACTACAATAGTGAAGCCACAGATGTATTGTAGTAATTGATGAGGTTGATGCCTA  
TGCTGTTGACAGTGAGCGACACACTGACATGGAGATACTATAGTGAAGCCACAGATGTATAGTATCTCCATGTCAGTGTGCTGCCTA  
TGCTGTTGACAGTGAGCGACGCCTTCATTATTCCCTACCAATAGTGAAGCCACAGATGTATTGGTAGGAATAATGAAGCGGTGCCTA  
TGCTGTTGACAGTGAGCGCCACCAGGACCGTCAAGATATATAGTGAAGCCACAGATGTATATATCTTGACGGTCTGGTGCCTA  
TGCTGTTGACAGTGAGCGCTCGGATAAAGCTCCACTTTGATAGTGAAGCCACAGATGTATCAAAGTGGAGCTTTATCCGATTGCCTA  
TGCTGTTGACAGTGAGCGCTAACGCCATTCTCATGTTCAATAGTGAAGCCACAGATGTATTGAACATGAGAATGGCGTTATGCCTA  
TGCTGTTGACAGTGAGCGCAAGAATGTGGAATTAAGCAAATAGTGAAGCCACAGATGTATTTGCTTAATTCCACATTCTTATGCCTA  
TGCTGTTGACAGTGAGCGCGAGGAAGATCTTGGACCTTTATAGTGAAGCCACAGATGTATAAAGGTCCAAGATCTTCCTCTGCCTA  
TGCTGTTGACAGTGAGCGAATCATTACCTTATGAAATATAGTGAAGCCACAGATGTATATTTATAAGGGTAAATGATCTGCCTA  
TGCTGTTGACAGTGAGCGATACCCAGTTTGTAAAGATTATAGTGAAGCCACAGATGTATAAATCCTTACAACTGGGTACTGCCTA  
TGCTGTTGACAGTGAGCGCCACCTACAAGCTGCTCCGTTATAGTGAAGCCACAGATGTATAACGGAGCAGCTTGTAGGTGATGCCTA  
TGCTGTTGACAGTGAGCGCCTGGTGTTCCTTTGCTAGGAATAGTGAAGCCACAGATGTATTCCTAGCAAAGAAACACCAGTTGCCTA  
TGCTGTTGACAGTGAGCGCACTGAACATTAGGACATCAAATAGTGAAGCCACAGATGTATTTGATGTCCTAATGTTTCAGTATGCCTA  
TGCTGTTGACAGTGAGCGCAATGTTAGTCTTGTAGCTGAATAGTGAAGCCACAGATGTATTCAGCTACAAGACTAACATTTGCCTA

TGCTGTTGACAGTGAGCGCTGGCATATACCTTTCTAAATATAGTGAAGCCACAGATGTATATTTAGAAAGGTATATGCCAATGCCTA  
TGCTGTTGACAGTGAGCGATGGAGACTTCCGACAGCTCTATAGTGAAGCCACAGATGTATAGAGCTGTCCGGAAGTCTCCAGTGCCTA  
TGCTGTTGACAGTGAGCGCTCCGACAGCTCTAGCCCTGATTAGTGAAGCCACAGATGTAATCAGGGCTAGAGCTGTCCGGAATGCCTA  
TGCTGTTGACAGTGAGCGCTCCATGATCAAGAGGGAGTAATAGTGAAGCCACAGATGTATTACTCCCTCTTGATCATGGAATGCCTA  
TGCTGTTGACAGTGAGCGACAGCTGTAGGCTAGCATCCCATAGTGAAGCCACAGATGTATGGGATGCTAGCCTACAGCTGGTGCCTA  
TGCTGTTGACAGTGAGCGCTCCCATGTGCGCATCACTGGATAGTGAAGCCACAGATGTATCCAGTGATGCGCACATGGGATTGCCTA  
TGCTGTTGACAGTGAGCGCAGCAGAACATTGGAAATTAATAGTGAAGCCACAGATGTATTAATTTCCAATGTTCTGCTATGCCTA  
TGCTGTTGACAGTGAGCGAACATTGGAAATTAACCTTTATAGTGAAGCCACAGATGTATAAAGTTAATTTCCAATGTTCTGCCTA  
TGCTGTTGACAGTGAGCGCCAGTGTCAATTCAGAACCCTTATAGTGAAGCCACAGATGTATAAGGTTCTGAAATGACACTGATGCCTA  
TGCTGTTGACAGTGAGCGAATGAAGCTATTTCCATTGTTATAGTGAAGCCACAGATGTATAACAATGGAAATAGCTTCATCTGCCTA  
TGCTGTTGACAGTGAGCGCCAGCATAGTCAGGGCTACATATAGTGAAGCCACAGATGTATATGTAGCCCTGACTATGCTGATGCCTA  
TGCTGTTGACAGTGAGCGCCCCGGAACAGAGAATGTTAATAGTGAAGCCACAGATGTATTAACATTCTCTGTTCCGCGGTTGCCTA  
TGCTGTTGACAGTGAGCGACAGGCCCTGTCCGAGATTCATAGTGAAGCCACAGATGTATTGAATCTCGGACAGGGCCTGGTGCCTA  
TGCTGTTGACAGTGAGCGACTGGTTGCCAAGGCTACATAATAGTGAAGCCACAGATGTATTATGTAGCCTTGGCAACCAGGTGCCTA  
TGCTGTTGACAGTGAGCGCGAGCAGTATAACTCCATTTAATAGTGAAGCCACAGATGTATTAATGGAGTTATACTGCTCATGCCTA  
TGCTGTTGACAGTGAGCGCCAAGGTAACCAGACCTGAATAGTGAAGCCACAGATGTATTCAGGTCTGGTTTACCCTTGTGCCTA  
TGCTGTTGACAGTGAGCGCCAGATGTAACAGAACAATTTATAGTGAAGCCACAGATGTATAAATTTGTTCTGTTACATCTGATGCCTA  
TGCTGTTGACAGTGAGCGCTCCACTGGGTTTTCGCCTGTAATAGTGAAGCCACAGATGTATTACAGGCGAAACCCAGTGGAATGCCTA  
TGCTGTTGACAGTGAGCGATAGCACTTACGTGAAATATTTTAGTGAAGCCACAGATGTAAAAATTTTACGTAAGTACTACTGCCTA  
TGCTGTTGACAGTGAGCGACAAATAAGTTTCCCAATTAATAGTGAAGCCACAGATGTATTTAATTGGGAAACTTATTTGGTGCCTA  
TGCTGTTGACAGTGAGCGCACCGGTGACCAAGATCACCAATAGTGAAGCCACAGATGTATTGGTGATCTTGGTCACCGGTTTGCCTA  
TGCTGTTGACAGTGAGCGCCAGCCTTGCCCTGGACCAGGTATAGTGAAGCCACAGATGTATACCTGGTCCAGGCAAGGCTGATGCCTA  
TGCTGTTGACAGTGAGCGATGCCTCCTTATCATAGGACAATAGTGAAGCCACAGATGTATTGTCTATGATAAGGAGGCAGTGCCTA  
TGCTGTTGACAGTGAGCGACACCTTATGTCCCTAAGGCTATAGTGAAGCCACAGATGTATAGCCTTAGGGACATAAGGTGGTGCCTA  
TGCTGTTGACAGTGAGCGAAAGTCACTTTCTTCAATAAATAGTGAAGCCACAGATGTATTTATGAAGGAAAGTGACTTCTGCCTA  
TGCTGTTGACAGTGAGCGAAAGGATTGAAGTTCAGATCAATAGTGAAGCCACAGATGTATTGATCTGAACTTCAATCCTTGTGCCTA  
TGCTGTTGACAGTGAGCGCCTGGATCTTTGTTTCATACAATAGTGAAGCCACAGATGTATTGTATGAAACAAAGATCCAGTTGCCTA  
TGCTGTTGACAGTGAGCGACAAGTTGTTGGACTAAATAATAGTGAAGCCACAGATGTATTTATAGTCCAACAAACTTGGTGCCTA  
TGCTGTTGACAGTGAGCGCCACTTTGTATTAGGTAGTTAATAGTGAAGCCACAGATGTATTAACCTAATAACAAAGTGCCTA  
TGCTGTTGACAGTGAGCGACTGAAATACCTTTGGAAGAAATAGTGAAGCCACAGATGTATTTCTTCAAAGGTATTTTCCAGTGCCTA  
TGCTGTTGACAGTGAGCGCAACCATATAATTTCTGGATATAGTGAAGCCACAGATGTATATCCAGAAATATGATGGTTTTGCCTA  
TGCTGTTGACAGTGAGCGCCAGCTGGATGGAAATCAGATATAGTGAAGCCACAGATGTATATCTGATTTCCATCCAGCTGATGCCTA  
TGCTGTTGACAGTGAGCGACTGCAGGATGTAATTTTCATAGTGAAGCCACAGATGTATGAAATAATTACATCCTGCAGGTGCCTA



TGCTGTTGACAGTGAGCGACACAGTCAGGTTGAAGACCTATAGTGAAGCCACAGATGTATAGGTCTTCAACCTGACTGTGCTGCCTA  
TGCTGTTGACAGTGAGCGAAGCAGTCTGACTAGTAATTAATAGTGAAGCCACAGATGTATTAATTAAGTACTAGTCAGACTGCTCTGCCTA  
TGCTGTTGACAGTGAGCGAAAGATTGTAGATTCAGGTTAATAGTGAAGCCACAGATGTATTAACCTGAATCTACAATCTTGTGCCTA  
TGCTGTTGACAGTGAGCGCAAGGATCATTCTTAAATAATTTAGTGAAGCCACAGATGTAAATTAATTAAGAATGATCCTTTTGCCTA  
TGCTGTTGACAGTGAGCGACGGAATTGTAAGGAAC TAGAATAGTGAAGCCACAGATGTATTCTAGTTCCTTACAATTCGGGTGCCTA  
TGCTGTTGACAGTGAGCGCAAGGAACTAGAAGGCCCTATATAGTGAAGCCACAGATGTATATAGGGCCTTCTAGTTCCTTATGCCTA  
TGCTGTTGACAGTGAGCGACACTGTTATCCAAGACTACAATAGTGAAGCCACAGATGTATTGTAGTCTTGGATAACAGTGGTGCCTA  
TGCTGTTGACAGTGAGCGCCACCCTCATCCTCTAATTC AATAGTGAAGCCACAGATGTATTGAATTAGAGGATGAGGGTGATGCCTA  
TGCTGTTGACAGTGAGCGACTGCCGAATTTGGAATCTTTAGTGAAGCCACAGATGTAAAGATTTCCAAATTCGGGCAGCTGCCTA  
TGCTGTTGACAGTGAGCGCTAGCGTGTTC AATCTGAATAGTGAAGCCACAGATGTATTCAGGATTGGAAACACGCTATTGCCTA  
TGCTGTTGACAGTGAGCGCAAGGGCGTTGTTTATCTGAAATAGTGAAGCCACAGATGTATTCAGATAAACAACGCCCTTTTGCCTA  
TGCTGTTGACAGTGAGCGCCCGAGTGTGGATTCAAGGAAATAGTGAAGCCACAGATGTATTCCTTGAATCCACACTCGGTTGCCTA  
TGCTGTTGACAGTGAGCGAACACAAGTGTCTGAAATACAATAGTGAAGCCACAGATGTATTGTATTCAGACACTTGTGTGTGCCTA  
TGCTGTTGACAGTGAGCGACGGGCTATTCTTAGATATGCATAGTGAAGCCACAGATGTATGCATATCTAAGAATAGCCCGGTGCCTA  
TGCTGTTGACAGTGAGCGCCACCAGACAGGTGTTATGGAATAGTGAAGCCACAGATGTATTCATAACACCTGTCTGGTGATGCCTA  
TGCTGTTGACAGTGAGCGAAAGGTTGTGAAATTCGAGAATAGTGAAGCCACAGATGTATTCCTCGAATTCACAACCTTCTGCCTA  
TGCTGTTGACAGTGAGCGCACGGTTTCTTACCAGCAAT TATAGTGAAGCCACAGATGTATAAATGCTGGTAAGAAAACCGTTTGCCTA  
TGCTGTTGACAGTGAGCGACTGGCTCAAGTCATCCTTCGATAGTGAAGCCACAGATGTATCGAAGGATGACTTGAGCCAGGTGCCTA  
TGCTGTTGACAGTGAGCGCACCGTTTGAATGACACATAGATAGTGAAGCCACAGATGTATCTATGTGTCATTCAAACGGTTTGCCTA  
TGCTGTTGACAGTGAGCGCCAGGATCAGAGTGGACTT TAAATAGTGAAGCCACAGATGTATTAAAGTCCACTCTGATCCTGTTGCCTA  
TGCTGTTGACAGTGAGCGACTGGAAGTCACTGACAGATAATAGTGAAGCCACAGATGTATTATCTGTCACTGACTTCCAGGTGCCTA  
TGCTGTTGACAGTGAGCGCCCGGTTATTATCCTAATTTATAGTGAAGCCACAGATGTATAAATTAGGATAATACCGCGGTTGCCTA  
TGCTGTTGACAGTGAGCGAAAGCTTCTGGTTAGAGACAAATAGTGAAGCCACAGATGTATTTGTCTCTAACCAGAAGCTTGTGCCTA  
TGCTGTTGACAGTGAGCGCATGGAATGTGAAATTAAGCTATAGTGAAGCCACAGATGTATAGCTTAATTTACATTC CATTGCCTA  
TGCTGTTGACAGTGAGCGACCGATGTAACAAATCATGAATAGTGAAGCCACAGATGTATTCATGATTTGTTTACATCGGCTGCCTA  
TGCTGTTGACAGTGAGCGACCGGAAGTCCCTAG AAGTGAATAGTGAAGCCACAGATGTATTCACTTCTAGGGACTTCCGGGTGCCTA  
TGCTGTTGACAGTGAGCGATTGAACCAGAATCGA ACTTTATAGTGAAGCCACAGATGTATAAAGTTCGATTCTGGTTCAAGTGCCTA  
TGCTGTTGACAGTGAGCGCCAGGGTACTTCCAGCAACAAATAGTGAAGCCACAGATGTATTTGTTGCTGGAAGTACCCTGTTGCCTA  
TGCTGTTGACAGTGAGCGCCACCTTGGAGCCACTATCAAATAGTGAAGCCACAGATGTATTTGATAGTGGCTCCAAGGTGTTGCCTA  
TGCTGTTGACAGTGAGCGACTGCAGATATTT CATCAAATATAGTGAAGCCACAGATGTATATTTGATGAAATATCTGCAGCTGCCTA  
TGCTGTTGACAGTGAGCGCCAGGGCTGCTTTACGCATAAATAGTGAAGCCACAGATGTATTTATGCGTAAAGCAGCCCTGTTGCCTA  
TGCTGTTGACAGTGAGCGCACAGTGATCACTTTACTAAATAGTGAAGCCACAGATGTATTTAGTAAAGTGATCACTGGTTTGCCTA  
TGCTGTTGACAGTGAGCGACAGGCCCTCAGTTTAACTAAATAGTGAAGCCACAGATGTATTTAGTTAAACTGAGGGCCTGCTGCCTA

TGCTGTTGACAGTGAGCGCAAAGGTTGCCATAAAGGACAATAGTGAAGCCACAGATGTATTGTCCTTTATGGCAACCTTTATGCCTA  
TGCTGTTGACAGTGAGCGACGGGTAGATCCTACCGTTGAATAGTGAAGCCACAGATGTATTCAACGGTAGGATCTACCCGGTGCCTA  
TGCTGTTGACAGTGAGCGAATGAACAGAGTTGAAGTTAAATAGTGAAGCCACAGATGTATTTAACTTCAACTCTGTTTCATGTGCCTA  
TGCTGTTGACAGTGAGCGCAAGCCTTGCTTTATTACTGAATAGTGAAGCCACAGATGTATTCAGTAATAAAGCAAGGCTTTTGCCTA  
TGCTGTTGACAGTGAGCGCTTGAAGACCGTTAGTGTATAATAGTGAAGCCACAGATGTATTATACACTAACGGTCTTCAAATGCCTA  
TGCTGTTGACAGTGAGCGCCCCGAGGATTGAAGAGCTTAATAGTGAAGCCACAGATGTATTAAGCTCTTCAATCCTGCGGATGCCTA  
TGCTGTTGACAGTGAGCGAAAAGATTCACCGACATTCAATAGTGAAGCCACAGATGTATTGAATGTCGGTGAAATCTTTCTGCCTA  
TGCTGTTGACAGTGAGCGACAGCATCATTGAGTATTACTATAGTGAAGCCACAGATGTATAGTAATACTCAATGATGCTGGTGCCTA  
TGCTGTTGACAGTGAGCGACAGGTTTATATTCCCAACTATTAGTGAAGCCACAGATGTAAATAGTTGGGAATATAAACCTGCTGCCTA  
TGCTGTTGACAGTGAGCGAAAGAAATATGGTGGCTTGAATAGTGAAGCCACAGATGTATTTCAAGCCACCATATTTCTTCTGCCTA  
TGCTGTTGACAGTGAGCGAACGGATTGAGGAGCTCAATAATAGTGAAGCCACAGATGTATTATTTAGCTCCTCAATCCGTCTGCCTA  
TGCTGTTGACAGTGAGCGAAGGGAGAATCAGATAATCGAATAGTGAAGCCACAGATGTATTCGATTATCTGATTCCTCCTGCCTA  
TGCTGTTGACAGTGAGCGCACGGGAAGGATTTCAATGATATAGTGAAGCCACAGATGTATATCATTGAAATCCTTCCCGTATGCCTA  
TGCTGTTGACAGTGAGCGACTCAGGCACCTCTGAAACCAATAGTGAAGCCACAGATGTATTGGTTTTAGAGGTGCCTGAGCTGCCTA  
TGCTGTTGACAGTGAGCGACTCGCCGACAAGCATGCTAAATAGTGAAGCCACAGATGTATTTAGCATGCTTGTGCGCGAGCTGCCTA  
TGCTGTTGACAGTGAGCGCCAGATGAGAGGGAACAATCAATAGTGAAGCCACAGATGTATTGATTGTTCCCTCTCATCTGATGCCTA  
TGCTGTTGACAGTGAGCGAACGGCCGTTTGTGCTATTAATAGTGAAGCCACAGATGTATTAATAGCAACAAACGGCCGTCTGCCTA  
TGCTGTTGACAGTGAGCGACCGCAAAGAAACCTAATGTAATAGTGAAGCCACAGATGTATTACATTAGGTTTTCTTTGCGGGTGCCTA  
TGCTGTTGACAGTGAGCGCCTGCGAGTACTGCCTCAAATATAGTGAAGCCACAGATGTATATTTGAGGCAGTACTCGCAGATGCCTA  
TGCTGTTGACAGTGAGCGAAGGGAAGGAGATCTATCGAAATAGTGAAGCCACAGATGTATTTGATAGATCTCCTTCCCTGTGCCTA  
TGCTGTTGACAGTGAGCGACAGCATGTTATCTGTGTACATAGTGAAGCCACAGATGTATGTGACACAGATAACATGCTGGTGCCTA  
TGCTGTTGACAGTGAGCGACCCAGTATAAGAAACCCTATAGTGAAGCCACAGATGTATAGGTGGTTTTCTTATACTGGGCTGCCTA  
TGCTGTTGACAGTGAGCGACAGGCAGTAGTTCAGATGGAATAGTGAAGCCACAGATGTATTCCATCTGAACTACTGCCTGCTGCCTA  
TGCTGTTGACAGTGAGCGCAAGCTACAATTTCAACATGAATAGTGAAGCCACAGATGTATTCATGTTGAAATTGTAGCTTTTGCCTA  
TGCTGTTGACAGTGAGCGAACGCTATACTATGATGTAGAATAGTGAAGCCACAGATGTATTCACATCATAGTATAGCGTCTGCCTA  
TGCTGTTGACAGTGAGCGACAGTTTCAGTGTAACGTTAATAGTGAAGCCACAGATGTATTAACAGTTACACTGAAACTGGTGCCTA  
TGCTGTTGACAGTGAGCGACTGGAGTGCCTTTATCACCAATAGTGAAGCCACAGATGTATTGGTGATAAAGGCACTCCAGGTGCCTA  
TGCTGTTGACAGTGAGCGCCAAGAACGCTTTGGTGATAAATAGTGAAGCCACAGATGTATTTATCACCAAAGCGTTCTTGTGCCTA  
TGCTGTTGACAGTGAGCGACCCGGTCAAACCTCGCCACCAATAGTGAAGCCACAGATGTATTGGTGGCGAGTTTGACCGGGGTGCCTA  
TGCTGTTGACAGTGAGCGATAGGGAGAATACAAAGGATAAATAGTGAAGCCACAGATGTATTATCCTTTGTATTCTCCCTACTGCCTA  
TGCTGTTGACAGTGAGCGCCAGAAGTTATGTCAACGTGAATAGTGAAGCCACAGATGTATTCACGTTGACATAACTTCTGTTGCCTA  
TGCTGTTGACAGTGAGCGCAAAGACCTAGATGGTGTAAATAGTGAAGCCACAGATGTATTTAGCACCATCTAGGTCTTTTGCCTA  
TGCTGTTGACAGTGAGCGAAACCACGGCTATATGAATCAATAGTGAAGCCACAGATGTATTGATTTCATATAGCCGTGGTTGTGCCTA

TGCTGTTGACAGTGAGCGCATGGAAATGCCTCTAACTTATAGTGAAGCCACAGATGTATAAAGTTAGAGGCATTTCCATATGCCTA  
TGCTGTTGACAGTGAGCGCAAGCTTACAAATCGCATGTAATAGTGAAGCCACAGATGTATTACATGCGATTTGTAAGCTTATGCCTA  
TGCTGTTGACAGTGAGCGCTTCCAGTAAGATCAAACCTAATAGTGAAGCCACAGATGTATTAAGTTTGATCTTACTGGAAATGCCTA  
TGCTGTTGACAGTGAGCGCCTTGAAGTTGATAGTATTTAATAGTGAAGCCACAGATGTATTAATACTATCAACTTCAAGATGCCTA  
TGCTGTTGACAGTGAGCGAAAAGTTCCTATTGTTAATAAATAGTGAAGCCACAGATGTATTTATTAACAATAGGAACTTTCTGCCTA  
TGCTGTTGACAGTGAGCGCCTGGAAATCCTTAACCAATTATAGTGAAGCCACAGATGTATAAATTGGTTAAGGATTTCCAGTTGCCTA  
TGCTGTTGACAGTGAGCGAAAGAGGAATGTGAGTATAAATTAGTGAAGCCACAGATGTAATTTATACTCACATTCCTCTTCTGCCTA  
TGCTGTTGACAGTGAGCGCCACTCCTATGATTAAGAAATATAGTGAAGCCACAGATGTATATTTCTTAATCATAGGAGTGATGCCTA  
TGCTGTTGACAGTGAGCGCCAGCTTCACACTCGAATTTTCATAGTGAAGCCACAGATGTATGAAATTCGAGTGTGAAGCTGATGCCTA  
TGCTGTTGACAGTGAGCGATAGAAGATATTGATCGTTAAATAGTGAAGCCACAGATGTATTTAACGATCAATATCTTCTACTGCCTA  
TGCTGTTGACAGTGAGCGAATGCAGTTACTGAAGACATAATAGTGAAGCCACAGATGTATTATGTCTTCAGTAACTGCATGTGCCTA  
TGCTGTTGACAGTGAGCGCCAGAATGAGTGTGACAAGGTATAGTGAAGCCACAGATGTATACCTTGTCCACTCATTTCTGATGCCTA  
TGCTGTTGACAGTGAGCGCAGGGCAATTCATGATCTTGAATAGTGAAGCCACAGATGTATTCAGATCATGAATTGCCCTTTGCCTA  
TGCTGTTGACAGTGAGCGCCAGGGATTATGGAAATAGGAATAGTGAAGCCACAGATGTATTCCTATTTCCATAATCCCTGATGCCTA  
TGCTGTTGACAGTGAGCGCAAGAGTCATCTAACTTCTAATAGTGAAGCCACAGATGTATTAGAAGTTTAGATGACTCTTATGCCTA  
TGCTGTTGACAGTGAGCGCCTGAAACACTCTATTGTGAAATAGTGAAGCCACAGATGTATTTACAATAGAGTGTTCAGTTGCCTA  
TGCTGTTGACAGTGAGCGCTCCGGAAAGGTTGTCAATATATAGTGAAGCCACAGATGTATATATTGACAACCTTTCCGGAATGCCTA  
TGCTGTTGACAGTGAGCGAATGGGTCAGATTAGCCAGCAATAGTGAAGCCACAGATGTATTGCTGGCTAATCTGACCCATCTGCCTA  
TGCTGTTGACAGTGAGCGACCGGCAGGCACCTTGAATGAATAGTGAAGCCACAGATGTATTCATTTCAAGTGCCTGCCGGCTGCCTA  
TGCTGTTGACAGTGAGCGACAGGCTTTCTTTAATGCCAATAGTGAAGCCACAGATGTATTGGGCATTAAAGAAAGCCTGCTGCCTA  
TGCTGTTGACAGTGAGCGCCTGGATGCTCTTGTAATAAATAGTGAAGCCACAGATGTATTTATTTACAAGAGCATCCAGATGCCTA  
TGCTGTTGACAGTGAGCGATCCGGTGCCAGTATACTTAATAGTGAAGCCACAGATGTATTAAGTATACTGGGCACCGGAGTGCCTA  
TGCTGTTGACAGTGAGCGACAAGGAGTATGCGTACCTGAATAGTGAAGCCACAGATGTATTCAGGTACGCATACTCCTTGGTGCCTA  
TGCTGTTGACAGTGAGCGACACGATCCTCTTCAACCCAGATAGTGAAGCCACAGATGTATCTGGGTTGAAGAGGATCGTGCTGCCTA  
TGCTGTTGACAGTGAGCGAGAGCAGGAAGCTGTACTTTTCATAGTGAAGCCACAGATGTATGAAAGTACAGCTTCCTGCTCCTGCCTA  
TGCTGTTGACAGTGAGCGCACAGAACTAAATTAAGTTATTTAGTGAAGCCACAGATGTAAATAACTTAATTTAGTTCTGTATGCCTA  
TGCTGTTGACAGTGAGCGCCAGAATCATATACCAATTGAATAGTGAAGCCACAGATGTATTC AATTGGTATATGATTCTGATGCCTA  
TGCTGTTGACAGTGAGCGCAAGGAGTTGATGGAACATATATAGTGAAGCCACAGATGTATATATGTTCCATCAACTCCTTTTGCCTA  
TGCTGTTGACAGTGAGCGACAGCAAGATTTGAAGAGTTAATAGTGAAGCCACAGATGTATTA ACTCTTCAAATCTTGCTGCTGCCTA  
TGCTGTTGACAGTGAGCGACAGGGATTTACTGCTGTTAAATAGTGAAGCCACAGATGTATTTAACAGCAGTAAATCCCTGCTGCCTA  
TGCTGTTGACAGTGAGCGCAAGGTTTCGAGTTTCATACTATTAGTGAAGCCACAGATGTAATAGTATGAAACTCGAACCTTTTGCCTA  
TGCTGTTGACAGTGAGCGAGAGGAGAATATAGATGACCAATAGTGAAGCCACAGATGTATTGGTCATCTATATTCTCCTCCTGCCTA  
TGCTGTTGACAGTGAGCGAACCAATGGATGCAGGACGAAATAGTGAAGCCACAGATGTATTTTCGTCCTGCATCCATTGGTCTGCCTA

TGCTGTTGACAGTGAGCGACACCTTCATCAACGACTTCTATAGTGAAGCCACAGATGTATAGAAGTCGTTGATGAAGGTGCTGCCTA  
TGCTGTTGACAGTGAGCGACACATTGGAATCAATTTCAAATAGTGAAGCCACAGATGTATTTGAAATTGATTCCAATGTGCTGCCTA  
TGCTGTTGACAGTGAGCGAACCGAATATTCCTCCAGAAATAGTGAAGCCACAGATGTATTTCTGGAGGGAATATTCGGTCTGCCTA  
TGCTGTTGACAGTGAGCGCGAGGATGAAATTAACTCTGAATAGTGAAGCCACAGATGTATTCAGAGTTAATTTATCCTCTTGCCTA  
TGCTGTTGACAGTGAGCGAAAGGGCAAGCACAGTGTCAAATAGTGAAGCCACAGATGTATTTGACACTGTGCTTGCCCTTGTGCCTA  
TGCTGTTGACAGTGAGCGCAAGGGCTATAGTTCTCAATTATAGTGAAGCCACAGATGTATAATTGAGAACTATAGCCCTTTTGCCTA  
TGCTGTTGACAGTGAGCGCAGGGCTATAGTTCTCAATTAATAGTGAAGCCACAGATGTATTAATTGAGAACTATAGCCCTTTTGCCTA  
TGCTGTTGACAGTGAGCGAAGCACGCAGGATGAAAGTAAATAGTGAAGCCACAGATGTATTTACTTTTATCCTGCGTGTGCTGCCTA  
TGCTGTTGACAGTGAGCGCAGGAACTGTCAGACAAAGTAATAGTGAAGCCACAGATGTATTACTTTGTCTGACAGTTCCCTTGCCTA  
TGCTGTTGACAGTGAGCGCGACATTGAAATTGCCCTTAAATAGTGAAGCCACAGATGTATTTAAGGGCAATTTCAATGTCTTGCCTA  
TGCTGTTGACAGTGAGCGAGACCAACACTATAGAAACCTATAGTGAAGCCACAGATGTATAGGTTTCTATAGTGTGGTCTTGCCTA  
TGCTGTTGACAGTGAGCGAGAGGCCAATCCTAAAGCACAAATAGTGAAGCCACAGATGTATTTGTGCTTTAGGATTGGCCTCCTGCCTA  
TGCTGTTGACAGTGAGCGCATGGTGAATGTTGATCAGACATAGTGAAGCCACAGATGTATGTCTGATCAACATTCACCATATGCCTA  
TGCTGTTGACAGTGAGCGAATAGTGGAACTTGCCCATCAATAGTGAAGCCACAGATGTATTTGATGGGCAAGTCCACTATCTGCCTA  
TGCTGTTGACAGTGAGCGCATCGCTGAGTACAAACGCCAATAGTGAAGCCACAGATGTATTTGGCGTTTGTACTCAGCGATTTGCCTA  
TGCTGTTGACAGTGAGCGACCCAGTGCCGACACCAACAAATAGTGAAGCCACAGATGTATTTGTTGGTGTGCGCACTGGGGTGCCTA  
TGCTGTTGACAGTGAGCGACCTGGATGACATGAAAGCCAATAGTGAAGCCACAGATGTATTTGGCTTTTATGTATCCAGGCTGCCTA  
TGCTGTTGACAGTGAGCGACAGGCCACAGTCTACCTATAGTGAAGCCACAGATGTATAGGGTAGGACTGTGGGCCTGGTGCCTA  
TGCTGTTGACAGTGAGCGCCTGGACTATGAATCATATAAATAGTGAAGCCACAGATGTATTTATATGATTCATAGTCCAGTTGCCTA  
TGCTGTTGACAGTGAGCGACACATTAAGTCTTCTGATTAATAGTGAAGCCACAGATGTATTAATCAGAAGACTTAATGTGGTGCCTA  
TGCTGTTGACAGTGAGCGCATGGCTGTTAAAGATATGAAATAGTGAAGCCACAGATGTATTTTATATCTTTAACAGCCATATGCCTA  
TGCTGTTGACAGTGAGCGCTAGAATTGGGTGATTATTTAATAGTGAAGCCACAGATGTATTAATAATCACCAATTCTAATGCCTA  
TGCTGTTGACAGTGAGCGCATGCTTACATTCCTTCTGCAATAGTGAAGCCACAGATGTATTTGCAGAAGGAATGTAAGCATTGCCTA  
TGCTGTTGACAGTGAGCGAACGGGACTTCTATGCAGCATATAGTGAAGCCACAGATGTATATGCTGCATAGAAGTCCCGTCTGCCTA  
TGCTGTTGACAGTGAGCGCCAGTCTTCCATTGAGTCTTATAGTGAAGCCACAGATGTATAGAACTCAATGGAAAGACTGATGCCTA  
TGCTGTTGACAGTGAGCGAAAGGTGGAGATCCTCTATGAATAGTGAAGCCACAGATGTATTCATAGAGGATCTCCACCTTGTGCCTA  
TGCTGTTGACAGTGAGCGATGAAGGAATACTACACCTTAATAGTGAAGCCACAGATGTATTAAGGTGTAGTATTCCTTCAGTGCCTA  
TGCTGTTGACAGTGAGCGACAGGCATTAATAGACCAGTTATAGTGAAGCCACAGATGTATAACTGGTCTATTAATGCCTGGTGCCTA  
TGCTGTTGACAGTGAGCGAAGGCATTAATAGACCAGTTAATAGTGAAGCCACAGATGTATTAACTGGTCTATTAATGCCTGTGCCTA  
TGCTGTTGACAGTGAGCGCAGGGATGAACTGTGAAAGCAATAGTGAAGCCACAGATGTATTTGCTTTTACAGTTTATCCCTTTGCCTA  
TGCTGTTGACAGTGAGCGCTTGACTTTGTTACTCTTATAGTGAAGCCACAGATGTATAAGAGTGTAAACAAAGTCCAAATGCCTA  
TGCTGTTGACAGTGAGCGCCTGTTAGATGCTACTAAGAAATAGTGAAGCCACAGATGTATTTCTTAGTAGCATCTAACAGATGCCTA  
TGCTGTTGACAGTGAGCGATCGGGTGAATTTGCACGTATATAGTGAAGCCACAGATGTATATACGTGCAAATTCACCCGACTGCCTA

TGCTGTTGACAGTGAGCGAATCAATGATCTTGACGCTAAATAGTGAAGCCACAGATGTATTTAGCGTCAAGATCATTGATGTGCCTA  
TGCTGTTGACAGTGAGCGACTGTACTTGGGTACCATCAAATAGTGAAGCCACAGATGTATTTGATGGTACCCAAGTACAGCTGCCTA  
TGCTGTTGACAGTGAGCGCTTCTGGTCTATGGAAGGATATAGTGAAGCCACAGATGTATATCCTTCCATAGAACCAGAAATGCCTA  
TGCTGTTGACAGTGAGCGATACGGAGACAGATTCATGAATAGTGAAGCCACAGATGTATTCATAGAATCTGTCTCCGTAGTGCCTA  
TGCTGTTGACAGTGAGCGCCTGTATGACTGTAATAAAGATTAGTGAAGCCACAGATGTAATCTTTATTACAGTCATACAGTTGCCTA  
TGCTGTTGACAGTGAGCGACACACGCAGAATGACATGGAATAGTGAAGCCACAGATGTATTCATGTCAATCTGCGTGTGGTGCCTA  
TGCTGTTGACAGTGAGCGCAAGGATCATTCTGGTTTCAGATAGTGAAGCCACAGATGTATCTGAAACCAGAATGATCCTTATGCCTA  
TGCTGTTGACAGTGAGCGAAAAGTTTATCGTGGCTATTAATAGTGAAGCCACAGATGTATTAATAGCCACGATAAACTTTGTGCCTA  
TGCTGTTGACAGTGAGCGACCAGTTCATATTACTCTTGTATAGTGAAGCCACAGATGTATACAAGAGTAATATGAACTGGGTGCCTA  
TGCTGTTGACAGTGAGCGACTCAATGTCATTAGTTTGAATAGTGAAGCCACAGATGTATTCAAAATAATGACATTGAGGTGCCTA  
TGCTGTTGACAGTGAGCGCCTGGACATCTTTCGAGGCTTATAGTGAAGCCACAGATGTATAAGCCTCGAAAGATGTCCAGATGCCTA  
TGCTGTTGACAGTGAGCGACGGACTGTACAGCTCATAAATAGTGAAGCCACAGATGTATTTAATGAGCTGTACAGTCCGCTGCCTA  
TGCTGTTGACAGTGAGCGCCCGCTTACGTTGACATAACATAGTGAAGCCACAGATGTATGTATGTCAACGTAAAGCGGATGCCTA  
TGCTGTTGACAGTGAGCGCAGGAAGTAGCTTATTGTTCTATAGTGAAGCCACAGATGTATAGAACAATAAGCTACTTCTTTGCCTA  
TGCTGTTGACAGTGAGCGAAAGAGCATTTGTCAACAGCAATAGTGAAGCCACAGATGTATTGCTGTTGACAAATGCTCTTCTGCCTA  
TGCTGTTGACAGTGAGCGATCGCAACATGCTCAAGCCAAATAGTGAAGCCACAGATGTATTTGGCTTGAGCATGTTGCGACTGCCTA  
TGCTGTTGACAGTGAGCGCACGGATATACTCATTAAACATATAGTGAAGCCACAGATGTATATGTTAATGAGTATATCCGTTTGCCTA  
TGCTGTTGACAGTGAGCGCCAAGCTGTGTTTACGACAAAATAGTGAAGCCACAGATGTATTTGTCGTCAAACACAGCTTGATGCCTA  
TGCTGTTGACAGTGAGCGCCGGGATGAACATCTACTTCTATAGTGAAGCCACAGATGTATAGAAGTAGATGTTTATCCCGTTGCCTA  
TGCTGTTGACAGTGAGCGCAAGCAATACAGTAGTGAGAAAATAGTGAAGCCACAGATGTATTTCTCACTACTGTATTGCTTTTGCCTA  
TGCTGTTGACAGTGAGCGATACAGCGTGAAGAAATCTATAGTGAAGCCACAGATGTATAGAATTTCTTTCACGCTGTACTGCCTA  
TGCTGTTGACAGTGAGCGCTAGCGCCTTCTTACTAAATAGTGAAGCCACAGATGTATTTAGTAATAGGAAGCGCTATTGCCTA  
TGCTGTTGACAGTGAGCGCAAGGCTCAGGCCACACTTAAATAGTGAAGCCACAGATGTATTTAAGTGTGGCTGAGCCTTTTGCCTA  
TGCTGTTGACAGTGAGCGAAGGCGTTTGACTTCTCTTAAATAGTGAAGCCACAGATGTATTAAGAGAAAGTCAAACGCTCTGCCTA  
TGCTGTTGACAGTGAGCGACTGCATTTCCCTACAAAGGAATAGTGAAGCCACAGATGTATTCCTTTGTAGGGAAATGCAGCTGCCTA  
TGCTGTTGACAGTGAGCGACAGGGCCAAACGCATCCGAAAATAGTGAAGCCACAGATGTATTTCCGATGCGTTTGGCCCTGCTGCCTA  
TGCTGTTGACAGTGAGCGCCAGAACTGTCCAGACCTTAAATAGTGAAGCCACAGATGTATTAAGGTCTGGACAGTTCTGTTGCCTA  
TGCTGTTGACAGTGAGCGACAACATGACCCTGCTCTTCAATAGTGAAGCCACAGATGTATGAAGAGCAGGGTCAATGTTGCTGCCTA  
TGCTGTTGACAGTGAGCGACGCCAGCATGTTTATGACCATTAGTGAAGCCACAGATGTAATGGTCAATGAACATGCTGGCGCTGCCTA  
TGCTGTTGACAGTGAGCGCAAGGCTGATTACTACACCAATAGTGAAGCCACAGATGTATTGGTGTAGTAATCAGCCTTGATGCCTA  
TGCTGTTGACAGTGAGCGAAAGGCTGATTACTACACCAATAGTGAAGCCACAGATGTATTTGGTGTAGTAATCAGCCTTGTGCCTA  
TGCTGTTGACAGTGAGCGCTTCAACGAGGATGGTACAGTATAGTGAAGCCACAGATGTATACTGTACCATCCTCGTTGAATTGCCTA  
TGCTGTTGACAGTGAGCGCAGGCACGAGCATCTTCTACAATAGTGAAGCCACAGATGTATTGTAGAAGATGCTCGTGCCTATGCCTA

TGCTGTTGACAGTGAGCGACACGCGACATCTCTGTCTATAGTGAAGCCACAGATGTATAGGACAGAGATGTCCGCGTGGTGCCTA  
TGCTGTTGACAGTGAGCGCATCTAAGATGATATTTACGAATAGTGAAGCCACAGATGTATTCGTAAATATCATCTTAGATATGCCTA  
TGCTGTTGACAGTGAGCGCCTGGAAGCTATTGCAGACTTATAGTGAAGCCACAGATGTATAAGTCTGCAATAGCTTCCAGATGCCTA  
TGCTGTTGACAGTGAGCGACACATAGGTTGTGGTTCTCTATAGTGAAGCCACAGATGTATAGAGAACCACAACCTATGTGCTGCCTA  
TGCTGTTGACAGTGAGCGCCACGTCAATATAAGCATCTCATAGTGAAGCCACAGATGTATGAGATGCTTATATTGACGTGATGCCTA  
TGCTGTTGACAGTGAGCGCAAGCATTTCACTGCATAGCAATAGTGAAGCCACAGATGTATTGCTATGCAGTGAATGCTTATGCCTA  
TGCTGTTGACAGTGAGCGCATCGTGGTAGTGGATGTATAATAGTGAAGCCACAGATGTATTATACATCCACTACCACGATATGCCTA  
TGCTGTTGACAGTGAGCGACCGTAATTGCTTCCCTACTATAGTGAAGCCACAGATGTATAGTAGGGAAGCAATTACCGGGTGCCTA  
TGCTGTTGACAGTGAGCGACTGCTAGGTCTTTGAAAGCAATAGTGAAGCCACAGATGTATTGCTTTCAAAGACCTAGCAGGTGCCTA  
TGCTGTTGACAGTGAGCGACTGGGTCTTGTGATTAAAGAATAGTGAAGCCACAGATGTATTCCTTAAATCACAAGACCCAGGTGCCTA  
TGCTGTTGACAGTGAGCGATGGCTTTAAATTTGTCTATATAGTGAAGCCACAGATGTATATAGGACAAATTTAAAGCCAGTGCCTA  
TGCTGTTGACAGTGAGCGCACCTAGAGATTTGGTATGTTATAGTGAAGCCACAGATGTATAACATACCAAATCTCTAGGTATGCCTA  
TGCTGTTGACAGTGAGCGCCCAGAGTGTATGGTCCACCAATAGTGAAGCCACAGATGTATTGGTGACCATGACACTCTGGATGCCTA  
TGCTGTTGACAGTGAGCGACAGCCTCTGGTCATTATCAAATAGTGAAGCCACAGATGTATTTGATAATGACCAGAGGCTGCTGCCTA  
TGCTGTTGACAGTGAGCGACAGTAAGATGTTCTACCGCAATAGTGAAGCCACAGATGTATTGCGGTAGAACATCTTACTGCTGCCTA  
TGCTGTTGACAGTGAGCGACTGGTTCGTTACAAGAAGGAATAGTGAAGCCACAGATGTATTCCTTCTTGTAAACGAACCAGGTGCCTA  
TGCTGTTGACAGTGAGCGCCACAGAGTACATGCTTCAGAAATAGTGAAGCCACAGATGTATTCGAAGCATGTACTCTGTGATGCCTA  
TGCTGTTGACAGTGAGCGAAACGAACAGATTTACTATAAAATAGTGAAGCCACAGATGTATTTATAGTAAATCTGTTCGTTGTGCCTA  
TGCTGTTGACAGTGAGCGAACCGCTGGGTTGTCATTTAATAGTGAAGCCACAGATGTATTAATGACAACCCAGGCGGTCTGCCTA  
TGCTGTTGACAGTGAGCGCCCCGTAGATGCACTTATTGAATAGTGAAGCCACAGATGTATTCATAAAGTGCATCTACGGGATGCCTA  
TGCTGTTGACAGTGAGCGAACGCGCTTGAGAATAGTCAATAGTGAAGCCACAGATGTATTGACTATTCTCAAGCCGCGTCTGCCTA  
TGCTGTTGACAGTGAGCGCCACGAGATTGATATGCAATAATAGTGAAGCCACAGATGTATTATTCATATCAATCTCGTGTGCCTA  
TGCTGTTGACAGTGAGCGACCGAATGAAAGCTCTGTGAAATAGTGAAGCCACAGATGTATTTACAGAGCTTTTCAATTCGGTGCCTA  
TGCTGTTGACAGTGAGCGAAAGAGGTACTCTCTAAGAAATAGTGAAGCCACAGATGTATTTCTTAGGAGTGTACCTCTTCTGCCTA  
TGCTGTTGACAGTGAGCGACACCGCAGATACGGAGATCAATAGTGAAGCCACAGATGTATTGATCTCCGTATCTGCGGTGCTGCCTA  
TGCTGTTGACAGTGAGCGAAAGAGCAAAGCTGTTCTACAATAGTGAAGCCACAGATGTATTGTAGAACAGCTTTGCTCTTCTGCCTA  
TGCTGTTGACAGTGAGCGCCACACTGTCTCTGGGAATCAATAGTGAAGCCACAGATGTATTGATTCCAGAGACAGTGTGATGCCTA  
TGCTGTTGACAGTGAGCGACGGAATTACGCTCAACAGATATAGTGAAGCCACAGATGTATATCTGTTGAGCGTAATTCGGTGCCTA  
TGCTGTTGACAGTGAGCGCAACGAGATTATGTCTGCGAAATAGTGAAGCCACAGATGTATTTGCGAGACATAATCTCGTTTTGCCTA  
TGCTGTTGACAGTGAGCGCTAGGAGCCTGTAATTAGTTATAGTGAAGCCACAGATGTATAACTAATTACAGGCCTCCTAATGCCTA  
TGCTGTTGACAGTGAGCGAAACATTAACAGTGTGAGATATAGTGAAGCCACAGATGTATATCTCAACACTGTTAATGTTCTGCCTA  
TGCTGTTGACAGTGAGCGACTGAGTGTAGAGGATACCAAATAGTGAAGCCACAGATGTATTTGGTATCCTCTACACTCAGCTGCCTA  
TGCTGTTGACAGTGAGCGCCACCGGTGATCCTAAGAGAAATAGTGAAGCCACAGATGTATTTCTCTTAGGATCACCGGTGTTGCCTA

TGCTGTTGACAGTGAGCGACACAGGAAGATTCATGAGATATAGTGAAGCCACAGATGTATATCTCATGAATCTCCTGTGCTGCCTA  
TGCTGTTGACAGTGAGCGACACTGTGATGCCACATTTAAATAGTGAAGCCACAGATGTATTTAAATGTGGCATCACAGTGGTGCCTA  
TGCTGTTGACAGTGAGCGCCAGAGTATTCTGGCTGATTAATAGTGAAGCCACAGATGTATTAATCAGCCAGAATACTCTGTTGCCTA  
TGCTGTTGACAGTGAGCGAACTGTGGAGAACAGAATCTAATAGTGAAGCCACAGATGTATTAGATTCTGTTCTCCACAGTGTGCCTA  
TGCTGTTGACAGTGAGCGACCCGGAATCAATCGAAGTGGATAGTGAAGCCACAGATGTATCCACTTCGATTGATTCCGGGCTGCCTA  
TGCTGTTGACAGTGAGCGCCTGGCCGGAATTAACAGCAATAGTGAAGCCACAGATGTATTGCTGTTTTAATCCGGCCAGTTGCCTA  
TGCTGTTGACAGTGAGCGAAGCAAGGAAAGTCATGATTAATAGTGAAGCCACAGATGTATTAATCATGACTTTCCTTGCTGTGCCTA  
TGCTGTTGACAGTGAGCGACCCGGCACATGACCTCGCATAATAGTGAAGCCACAGATGTATTATGCGAGGTCATGTGCCGGGTGCCTA  
TGCTGTTGACAGTGAGCGCATCCCTAAGAGATTTATTAAATAGTGAAGCCACAGATGTATTTAATAAATCTCTTAGGGATATGCCTA  
TGCTGTTGACAGTGAGCGCAAGAGATTTATTAAACGGTATTAGTGAAGCCACAGATGTAATACCGTTTAATAAATCTCTTATGCCTA  
TGCTGTTGACAGTGAGCGCACGGTATAGTTTATCCAGGTATAGTGAAGCCACAGATGTATACCTGGATAAACTATAACCGTTTGCCTA  
TGCTGTTGACAGTGAGCGATAGGCTCAGCCCACCCTAAATAGTGAAGCCACAGATGTATTTAGGGTCGGGCTGAGCCTAGTGCCTA  
TGCTGTTGACAGTGAGCGACAGCTTTCATGTGTTACCAAATAGTGAAGCCACAGATGTATTTGGTAACACATGAAAGCTGGTGCCTA  
TGCTGTTGACAGTGAGCGCCAGTGATAAGTCAAATGTCAATAGTGAAGCCACAGATGTATTGACATTTGACTTATCACTGATGCCTA  
TGCTGTTGACAGTGAGCGACACGAGTTGACCGACATAAAATAGTGAAGCCACAGATGTATTTATGTCCGGTCAACTCGTGCTGCCTA  
TGCTGTTGACAGTGAGCGCCAGGCTCAGTCGACCATAAAATAGTGAAGCCACAGATGTATTTATGGTCGACTGAGACCTGTTGCCTA  
TGCTGTTGACAGTGAGCGCTGGGTGTAAGTGAAGATTTAATAGTGAAGCCACAGATGTATTTAAATCTTCACTTACACCCATTGCCTA  
TGCTGTTGACAGTGAGCGCAAGTTATAGATTTGTAAATAATAGTGAAGCCACAGATGTATTTTACAAATCTATAACTTTTGCCTA  
TGCTGTTGACAGTGAGCGCTTGCAAATCTTACACTGAAATAGTGAAGCCACAGATGTATTTCACTGTAAGAATTTGCAAATGCCTA  
TGCTGTTGACAGTGAGCGACAGAGTAACTGATTTAGAAAATAGTGAAGCCACAGATGTATTTCTAAATCAGGTTACTCTGGTGCCTA  
TGCTGTTGACAGTGAGCGCCTGCCTAGTATTAGCCATTAATAGTGAAGCCACAGATGTATTAATGGCTAATACTAGGCAGTTGCCTA  
TGCTGTTGACAGTGAGCGCCAGGAAGCCTTAAATATTTATAGTGAAGCCACAGATGTATAAAATATTTAAGGCTTCCTGTTGCCTA  
TGCTGTTGACAGTGAGCGCTTGAAGCTATCTCAAAGTAAATAGTGAAGCCACAGATGTATTTACTTTGAGATAGCTTCAATTGCCTA  
TGCTGTTGACAGTGAGCGCAGGGCTTAACTTCAACCTCAATAGTGAAGCCACAGATGTATTGAGGTTGAAGTTAAGCCCTTTGCCTA  
TGCTGTTGACAGTGAGCGAAGGGTGGGTAATTCAAATATATAGTGAAGCCACAGATGTATATATTTGAATTACCCACCTGTGCCTA  
TGCTGTTGACAGTGAGCGACACCATGTATCCTGAGTGGAAATAGTGAAGCCACAGATGTATCCACTCAGGATACATGGTGGTGCCTA  
TGCTGTTGACAGTGAGCGAAACCGTCGTGGAGCCATTAATAGTGAAGCCACAGATGTATTTAATGGCTCCACGACGGTTCTGCCTA  
TGCTGTTGACAGTGAGCGCCCGATTCAAGTTTATAACTATAGTGAAGCCACAGATGTATAGTTATAAACCTTGAATCGGTTGCCTA  
TGCTGTTGACAGTGAGCGCCTGCAGTTTCTACACAGCAAATAGTGAAGCCACAGATGTATTTGCTGTGTAGAACTGCAGTTGCCTA  
TGCTGTTGACAGTGAGCGCCCGCAACTCCATGTTTCACAATAGTGAAGCCACAGATGTATTGTGAAACATGGAGTTGCGGTTGCCTA  
TGCTGTTGACAGTGAGCGCTCGGCATCTCTTCAAAGACAATAGTGAAGCCACAGATGTATTGTCTTTGAAGAGATGCCGATTGCCTA  
TGCTGTTGACAGTGAGCGCCCGACAATATAAAGACTACAATAGTGAAGCCACAGATGTATTGTAGTCTTTATATTGTCCGGTTGCCTA  
TGCTGTTGACAGTGAGCGACACCATTGAATGAGGCCAATAGTGAAGCCACAGATGTATTGGGCCTCATTCCAATGGTGCCTA

TGCTGTTGACAGTGAGCGCATGAGACATGATCATATTGAATAGTGAAGCCACAGATGTATTCAATATGATCATGTCTCATATGCCTA  
TGCTGTTGACAGTGAGCGAAGACATGATCATATTGAACTATAGTGAAGCCACAGATGTATAGTTCAATATGATCATGTCTCTGCCTA  
TGCTGTTGACAGTGAGCGCCAAGGCCAAAGTCGAATCATATAGTGAAGCCACAGATGTATATGATTGACTTTGGCCTTGATGCCTA  
TGCTGTTGACAGTGAGCGAAAGGCCAAAGTCGAATCATATTAGTGAAGCCACAGATGTAATATGATTGACTTTGGCCTTGATGCCTA  
TGCTGTTGACAGTGAGCGCTTGCTTCAGTTTGATGTAGAATAGTGAAGCCACAGATGTATTCTACATCAAACGAAGCAAATGCCTA  
TGCTGTTGACAGTGAGCGCAAGGACAAAGTACGCACAGAATAGTGAAGCCACAGATGTATTCTGTGCGTACTTTGTCTTTTGCCTA  
TGCTGTTGACAGTGAGCGCTACAGAGATTTTCATATACCAATAGTGAAGCCACAGATGTATTGGTATATGAAATCTCTGTAATGCCTA  
TGCTGTTGACAGTGAGCGACAGGCTATGGATATCATAAGATAGTGAAGCCACAGATGTATCTTATGATATCCATAGCCTGGTGCCTA  
TGCTGTTGACAGTGAGCGCCTGGGTAGTAAGCCTAGATAATAGTGAAGCCACAGATGTATTATCTAGGCTTACTACCCAGTTGCCTA  
TGCTGTTGACAGTGAGCGCCCGCTTCGTGATTGGACTCTATAGTGAAGCCACAGATGTATAGAGTCCAATCACGAAGCGGTTGCCTA  
TGCTGTTGACAGTGAGCGAAAGAGGGAGTTTCATTCAGGAATAGTGAAGCCACAGATGTATTCCTGAATGAACTCCCTCTTGTGCCTA  
TGCTGTTGACAGTGAGCGCTCCGGCTGCTTTTCTACCTAATAGTGAAGCCACAGATGTATTAGGTAGGAAAGCAGCCGGAATGCCTA  
TGCTGTTGACAGTGAGCGACCCGGTCTACCTAGCAAGTTTTCAGTGAAGCCACAGATGTAAAACCTGCTAGGTAGACCCGGGCTGCCTA  
TGCTGTTGACAGTGAGCGCCCGCTTAGGCATCCTGAAGAATAGTGAAGCCACAGATGTATTCCTCAGGATGCCTAAGCGGTTGCCTA  
TGCTGTTGACAGTGAGCGACCCATCCCTATCAGTATGAAATAGTGAAGCCACAGATGTATTCATACTGATAGGGATGGGGTGCCTA  
TGCTGTTGACAGTGAGCGCCAGGTCTAATTCGTATGAAATAGTGAAGCCACAGATGTATTCATACAGAATTAGACCTGTTGCCTA  
TGCTGTTGACAGTGAGCGACTGTTCTTAAGTACTATTGAATAGTGAAGCCACAGATGTATTCATAGTACTTAAGAACAGCTGCCTA  
TGCTGTTGACAGTGAGCGACACAGCGGGCATTATAATTGATAGTGAAGCCACAGATGTATCAATTATAATGCCCGCTGTGGTGCCTA  
TGCTGTTGACAGTGAGCGCTAGGTTTCTGATATCAAGATATAGTGAAGCCACAGATGTATATCTTGATATCAGAAACCTAATGCCTA  
TGCTGTTGACAGTGAGCGAAAGCCTCACGTTTCTGTGCAATAGTGAAGCCACAGATGTATTGCACAGAAACGTGAGGCTTGTGCCTA  
TGCTGTTGACAGTGAGCGCCAGGACAGAACTGATCACTATTAGTGAAGCCACAGATGTAATAGTGATCAGTTCTGTCTGATGCCTA  
TGCTGTTGACAGTGAGCGCCAGCTATGTTGTGGAGTTTCATAGTGAAGCCACAGATGTATGAACTCCACAACATAGCTGATGCCTA  
TGCTGTTGACAGTGAGCGCAAGCATGTGTTCAAGGACAAAATAGTGAAGCCACAGATGTATTTGTCTTGAACACATGCTTATGCCTA  
TGCTGTTGACAGTGAGCGACTGGACAATGTCATCCCATATAGTGAAGCCACAGATGTATATGGTGATGACATTGTCCAGGTGCCTA  
TGCTGTTGACAGTGAGCGCCAGACAGTACAAGACTTCAATAGTGAAGCCACAGATGTATTGAAGTCTTGTACTGTCTGTTGCCTA  
TGCTGTTGACAGTGAGCGCCAGATGTTACACAGCTATGAATAGTGAAGCCACAGATGTATTCATAGCTGTGTAACATCTGTTGCCTA  
TGCTGTTGACAGTGAGCGCCCGCTTCTAATGTGAAAGCAATAGTGAAGCCACAGATGTATTGCTTTACATTAGAAGCGGTTGCCTA  
TGCTGTTGACAGTGAGCGCAGGATACATGCTGAAATTAATAGTGAAGCCACAGATGTATTTAATTTACAGCATGTATCCTTTGCCTA  
TGCTGTTGACAGTGAGCGCCAGCATGAGGAAGCAAATAAATAGTGAAGCCACAGATGTATTTATTTGCTTCTCATGCTGTTGCCTA  
TGCTGTTGACAGTGAGCGCTTCAGTGGCATTAGAACTAAATAGTGAAGCCACAGATGTATTTAGTTCTAATGCCACTGAAATGCCTA  
TGCTGTTGACAGTGAGCGAATGATGCTTGTAAGTGATAAATAGTGAAGCCACAGATGTATTTATCACTTACAAGCATCATGTGCCTA  
TGCTGTTGACAGTGAGCGCGACTATCAAGATTGTAATAAATAGTGAAGCCACAGATGTATTTATTACAATCTTGATAGTCATGCCTA  
TGCTGTTGACAGTGAGCGCCTGAATAGAGTACACAACTATAGTGAAGCCACAGATGTATAGTTTGTGTA CTCTATTTCAGTTGCCTA



TGCTGTTGACAGTGAGCGCTGGGAAAGTTTGGGTAATGAATAGTGAAGCCACAGATGTATTCATTACCCAAACTTTCCCAATGCCTA  
TGCTGTTGACAGTGAGCGAAAAGTGGATCTTGTGTTGCAAATAGTGAAGCCACAGATGTATTTGCAAACAAGATCCACTTTCTGCCTA  
TGCTGTTGACAGTGAGCGATCCATTTAAACCGAAACTCTATAGTGAAGCCACAGATGTATAGAGTTTCGGTTTAAATGGAGTGCCTA  
TGCTGTTGACAGTGAGCGATAGCTCCATATTGTGTATAAATAGTGAAGCCACAGATGTATTTATACACAATATGGAGCTACTGCCTA  
TGCTGTTGACAGTGAGCGAAAAGATGAGGTTTCGTTCCCTTATAGTGAAGCCACAGATGTATAAGGAACGAACCTCATCTTTGTGCCTA  
TGCTGTTGACAGTGAGCGCCAGCACTGAAAGGAGGTTTAAATAGTGAAGCCACAGATGTATTAACCTCCTTTTCAGTGCTGATGCCTA  
TGCTGTTGACAGTGAGCGCAGGAATTATAATGCTTATCTATAGTGAAGCCACAGATGTATAGATAAGCATTATAATTCCTATGCCTA  
TGCTGTTGACAGTGAGCGACCGCAGGAAGCCATCATGGATTAGTGAAGCCACAGATGTAATCCATGATGGCTTCTTCGCGGTGCCTA  
TGCTGTTGACAGTGAGCGACTGGATCTGATCAGACCGCCATAGTGAAGCCACAGATGTATGGCGGTCTGATCAGATCCAGGTGCCTA  
TGCTGTTGACAGTGAGCGATACGTGAAGACTACTGGGAATTAGTGAAGCCACAGATGTAATCCCAGTAGTCTTCACGTACTGCCTA  
TGCTGTTGACAGTGAGCGACACTATAAGTTTAGAATTCATAGTGAAGCCACAGATGTATGAAATTCCTAACTTATAGTGGTGCCTA  
TGCTGTTGACAGTGAGCGCTACCATGTGTTTATAAATTTATAGTGAAGCCACAGATGTATAAATTTATAAACACATGGTAATGCCTA  
TGCTGTTGACAGTGAGCGCTCCGGTACCATTGTAACATAAATAGTGAAGCCACAGATGTATTTAGTTACAATGGTACCGGAATGCCTA  
TGCTGTTGACAGTGAGCGCATGCATGTTTCGCTGAATATAAATAGTGAAGCCACAGATGTATTTATATTCAGCGAACATGCATTTGCCTA  
TGCTGTTGACAGTGAGCGCTAGATTAGTGGTTGTATTAATAGTGAAGCCACAGATGTATTTAATACAACCACTAATCTAATGCCTA  
TGCTGTTGACAGTGAGCGAACCGTGAAACAATTAAGTTATAGTGAAGCCACAGATGTATAACTTAATTGTTTCCACGGTGTGCCTA  
TGCTGTTGACAGTGAGCGAAACAGTGGAGATAACCTGATATAGTGAAGCCACAGATGTATATCAGGTTATCTCCACTGTTCTGCCTA  
TGCTGTTGACAGTGAGCGACCGGAAGTTTGAGGAAATGAATAGTGAAGCCACAGATGTATTCATTTCTCAAACCTTCGCGGTGCCTA  
TGCTGTTGACAGTGAGCGCTTGCTGATTGCAGTCAAGAATAGTGAAGCCACAGATGTATTTGACTGCAATCAGCCAATGCCTA  
TGCTGTTGACAGTGAGCGCAGGCAAGCACTTACTCATTAATAGTGAAGCCACAGATGTATTAATGAGTAAGTGCCTGCCTATGCCTA  
TGCTGTTGACAGTGAGCGACTGGAAGGTTTGAAGCCTTAAATAGTGAAGCCACAGATGTATTAAGGCTTCAAACCTTCAGGTGCCTA  
TGCTGTTGACAGTGAGCGCCCGCATGATCTTATCGGCAAATAGTGAAGCCACAGATGTATTTGCCGATAAGATCATGCGGTTGCCTA  
TGCTGTTGACAGTGAGCGCAAGGAAGATACTAATCGCTTTTATAGTGAAGCCACAGATGTAAAAGCGATTAGTATCTTCCTTATGCCTA  
TGCTGTTGACAGTGAGCGCGCGACTCCTATAATTTCTAATTAGTGAAGCCACAGATGTAAATAGAAATATAGGAGTCGCTGCCTA  
TGCTGTTGACAGTGAGCGCAAAGTGATACTTCAATATATTAGTGAAGCCACAGATGTAAATATATTGAAGTATCACTTTTATGCCTA  
TGCTGTTGACAGTGAGCGCCACAGTTGCCCTAAACTAGAATAGTGAAGCCACAGATGTATTCAGTTTAGGGCAACTGTGTTGCCTA  
TGCTGTTGACAGTGAGCGCCTCAGGGATTGCTTTCTGAAATAGTGAAGCCACAGATGTATTTAGAAAGCAATCCCTGAGTTGCCTA  
TGCTGTTGACAGTGAGCGCCGGGTATGCAGAATTTCTTATAGTGAAGCCACAGATGTATAAGAAATCTGCATAGCCCGATGCCTA  
TGCTGTTGACAGTGAGCGACAGGAAATGAAGCGTGCTAAATAGTGAAGCCACAGATGTATTTAGCACGCTTCATTTCTGCTGCCTA  
TGCTGTTGACAGTGAGCGCCAGACAAACCTTCATTTGTTTATAGTGAAGCCACAGATGTATAAACAATGAAGGTTTGTCTGATGCCTA  
TGCTGTTGACAGTGAGCGAACGAGCGGTGTAATGAGCAATAGTGAAGCCACAGATGTATGCTCATTTACACCGCTCGTGTGCCTA  
TGCTGTTGACAGTGAGCGACTGGATGAGTTCTATATTGGATAGTGAAGCCACAGATGTATCCAATATAGAACTCATCCAGCTGCCTA  
TGCTGTTGACAGTGAGCGACAGCTTGATATCAAAGGCCAATAGTGAAGCCACAGATGTATTTGCCTTTGATATCAAGCTGGTGCCTA

TGCTGTTGACAGTGAGCGACTGGATTGTACATAATGTTAATAGTGAAGCCACAGATGTATTAACATTATGTACAATCCAGCTGCCTA  
TGCTGTTGACAGTGAGCGACACGCAGGCTTTGTATCCTTATAGTGAAGCCACAGATGTATAAGGATACAAAGCCTGCGTGCTGCCTA  
TGCTGTTGACAGTGAGCGACAGGCTTTGTATCCTTATGTATAGTGAAGCCACAGATGTATACATAAGGATACAAAGCCTGCTGCCTA  
TGCTGTTGACAGTGAGCGATTCAAGGTTAATTTCCATGAATAGTGAAGCCACAGATGTATTCATGGAAATTAACCCTGAAGTGCCTA  
TGCTGTTGACAGTGAGCGCCAGGGTTAATTTCCATGAATTTAGTGAAGCCACAGATGTAAATTCATGGAAATTAACCCTGATGCCTA  
TGCTGTTGACAGTGAGCGCCTCTCATTTCTTTGTACTTAATAGTGAAGCCACAGATGTATTAAGTACAAAGAAATGAGAGATGCCTA  
TGCTGTTGACAGTGAGCGCTCCAAGAATGATAAATTTAAATAGTGAAGCCACAGATGTATTTAAATTTATCATTCTTGGATTGCCTA  
TGCTGTTGACAGTGAGCGAATGGTATAACCTACACCTTAATAGTGAAGCCACAGATGTATTAAGGTGTAGGTTATACCATCTGCCTA  
TGCTGTTGACAGTGAGCGCAAGGCTGTTCTCAAAGTGAATAGTGAAGCCACAGATGTATTTCAAGTTTGAAGAACGCTTTTGCCTA  
TGCTGTTGACAGTGAGCGACGGCTCATGGTTAGAATTGAATAGTGAAGCCACAGATGTATTCATTCATTAACCATGAGCCGGTGCCTA  
TGCTGTTGACAGTGAGCGACAGACTGAAGATTATAAGTGATAGTGAAGCCACAGATGTATCACTTATAATCTTCAGTCTGCTGCCTA  
TGCTGTTGACAGTGAGCGAACCCATCCTCATGCCAACAAATAGTGAAGCCACAGATGTATTTGTTGGCATGAGGATGGGTCTGCCTA  
TGCTGTTGACAGTGAGCGCCCGGCCACAATGGCCATCAATAGTGAAGCCACAGATGTATTGATGGCCATTGTGGCCCGGATGCCTA  
TGCTGTTGACAGTGAGCGAAACCTGATTTCTAATGGCTTATAGTGAAGCCACAGATGTATAAGCCATTAGAAATCAGGTTGTGCCTA  
TGCTGTTGACAGTGAGCGCCAGAATTTATAGAGCTAAGAATAGTGAAGCCACAGATGTATTCCTTAGCTCTATAAATTTCTGATGCCTA  
TGCTGTTGACAGTGAGCGCCTCGGCAGACATGCTGGTTAATAGTGAAGCCACAGATGTATTAACCAGCATGTCTGCCGAGATGCCTA  
TGCTGTTGACAGTGAGCGCCCGATACAAACGAGAAGACAATAGTGAAGCCACAGATGTATTGTCTTCTCGTTTGTATCGGATGCCTA  
TGCTGTTGACAGTGAGCGCTAGGCCTGCATAGAGAATTATAGTGAAGCCACAGATGTATAATTCTCTATGCAGCGCCTATTGCCTA  
TGCTGTTGACAGTGAGCGATAGGCTTTGGTTATTCTCAAATAGTGAAGCCACAGATGTATTTGAGAATAACCAAAGCCTAGTGCCTA  
TGCTGTTGACAGTGAGCGACACCTCAAATTTCTGTCTTCAATAGTGAAGCCACAGATGTATTGAAGACAGAATTTGAGGTGGTGCCTA  
TGCTGTTGACAGTGAGCGCTTGAGATATAATGCAGATCAATAGTGAAGCCACAGATGTATTGATCTGCATTATATCTCAATTGCCTA  
TGCTGTTGACAGTGAGCGCTTCGGCCTTGATTGTAACCAATAGTGAAGCCACAGATGTATTGGTTACAATCAAGCCGAAATGCCTA  
TGCTGTTGACAGTGAGCGAAGGGTGTAACTGTGAGATAAATAGTGAAGCCACAGATGTATTTATCTCACAGTTACACCCTCTGCCTA  
TGCTGTTGACAGTGAGCGATGGCTTAGCTTTGTATTTAAATAGTGAAGCCACAGATGTATTTAAATACAAAGCTAAGCCACTGCCTA  
TGCTGTTGACAGTGAGCGCTTGATTTAAATAGCAAACAATAGTGAAGCCACAGATGTATTGTTTGCTATTTAAATACAAATGCCTA  
TGCTGTTGACAGTGAGCGCCCGCCCAATGGTACTTCTCAATAGTGAAGCCACAGATGTATTGAGAAGTACCATTGGGCGGTTGCCTA  
TGCTGTTGACAGTGAGCGACCGGATCAGACCCATGAGAAATAGTGAAGCCACAGATGTATTTCTCATGGGTCTGATCCGGGTGCCTA  
TGCTGTTGACAGTGAGCGCCAGAAAGTTCAACCCTTTAATAGTGAAGCCACAGATGTATTAAGGGTTGAACTTTCTGTTGCCTA  
TGCTGTTGACAGTGAGCGCACCCATGGTATTGCCATTAATAGTGAAGCCACAGATGTATTTAATGGCAATACCATGGGTTTGCCTA  
TGCTGTTGACAGTGAGCGCAAAGGGTATGTTCACTTATAGTGAAGCCACAGATGTATAAGTAATGAACATACCCTTTTTGCCTA  
TGCTGTTGACAGTGAGCGCAAGGGTATGTTCACTTATTAGTGAAGCCACAGATGTATAAGTAATGAACATACCCTTTTTGCCTA  
TGCTGTTGACAGTGAGCGAAAGAATAAAGCTGACAATTTATAGTGAAGCCACAGATGTATAAATTTGTCAGCTTTATTTCTTGCCTA  
TGCTGTTGACAGTGAGCGACACGGTTTAAGTATAGAAATATAGTGAAGCCACAGATGTATATTTCTATACTTAAACCGTGGTGCCTA

TGCTGTTGACAGTGAGCGACCCAGATAGAATGTCCATCAATAGTGAAGCCACAGATGTATTGATGGACATTCTATCTGGGCTGCCTA  
TGCTGTTGACAGTGAGCGACAGATAGAATGTCCATCAATATAGTGAAGCCACAGATGTATATTGATGGACATTCTATCTGGTGCCTA  
TGCTGTTGACAGTGAGCGACGGCAATAAAGCTGTCTTCTATAGTGAAGCCACAGATGTATAGAAGACAGCTTTATTGCCGGTGCCTA  
TGCTGTTGACAGTGAGCGCAAGCAAGTTATTGGAACCCATTAGTGAAGCCACAGATGTAATGGGTTCCAATAACTTGCTTATGCCTA  
TGCTGTTGACAGTGAGCGCCCCGAATTTATTGTAAGTGCATAGTGAAGCCACAGATGTATGCACTTACAATAAATTCGGGTTGCCTA  
TGCTGTTGACAGTGAGCGCAAGGAAAGAGTTACCGAGCTATAGTGAAGCCACAGATGTATAGCTCGGTAACCTCTTTCCTTTTGCCTA  
TGCTGTTGACAGTGAGCGACCGGTGGGCATAGTAATTTATTAGTGAAGCCACAGATGTAATAAATTACTATGCCACCGGGTGCCTA  
TGCTGTTGACAGTGAGCGCAAGGCTTCACCTGGACAGTAATAGTGAAGCCACAGATGTATTACTGTCCAGGTGAAGCCTTTTGCCTA  
TGCTGTTGACAGTGAGCGATCCGGATGCTATCAAAGACAATAGTGAAGCCACAGATGTATTGTCTTTGATAGCATCCGGAGTGCCTA  
TGCTGTTGACAGTGAGCGACACGAGATAGCTACTGGGTAATAGTGAAGCCACAGATGTATTACCCAGTAGCTATCTCGTGGTGCCTA  
TGCTGTTGACAGTGAGCGCCCCGAGAATGATTGGGAAGAAATAGTGAAGCCACAGATGTATTTCTTCCCAATCATTCTCGGATGCCTA  
TGCTGTTGACAGTGAGCGACCGAGTGTCCAGCTATTTAATAGTGAAGCCACAGATGTATTAATAGCTGGGACACTCGGCTGCCTA  
TGCTGTTGACAGTGAGCGATAGGTTCAAGCTGAACCTCTATAGTGAAGCCACAGATGTATAGGAGTTCAGCTTGAACCTACTGCCTA  
TGCTGTTGACAGTGAGCGCAAGATGGTATATGTGATCAAATAGTGAAGCCACAGATGTATTTGATCACATATAACCATCTTATGCCTA  
TGCTGTTGACAGTGAGCGCAAGGGAGATAACCATTGTAGTATAGTGAAGCCACAGATGTATACTACAATGGTATCTCCCTTTTGCCTA  
TGCTGTTGACAGTGAGCGCCAACGGCTTCCCTGGAGATCATTAGTGAAGCCACAGATGTAATGATCTCCAGGAAGCGTTGTTGCCTA  
TGCTGTTGACAGTGAGCGCCCCGTATAGACATTTCCCAAGAATAGTGAAGCCACAGATGTATTTCTTGGGAATGTCTATACGGTTGCCTA  
TGCTGTTGACAGTGAGCGCTCCCAAGAACGGCAAGCTGAATAGTGAAGCCACAGATGTATTCAGCTTGCCGTTCTTGGGAATGCCTA  
TGCTGTTGACAGTGAGCGACAGGACAACCTCCCATAGCCATTAGTGAAGCCACAGATGTAATGGCTATGGGAGTTGTCTTGGTGCCTA  
TGCTGTTGACAGTGAGCGCCTGTGGAGTTCAACAATGCTATAGTGAAGCCACAGATGTATAGCATTGTTGAACTCCACAGATGCCTA  
TGCTGTTGACAGTGAGCGACAGATTGTTATTAATATCCCTTTAGTGAAGCCACAGATGTAAAGGATATTAATAACAATCTGCTGCCTA  
TGCTGTTGACAGTGAGCGAAACAATGTTAATGATTTAGAATAGTGAAGCCACAGATGTATTTCAAATCATTAAACATTTGTTGTCCTA  
TGCTGTTGACAGTGAGCGATAGGAATGTTGAGAACATTAATAGTGAAGCCACAGATGTATTAATGTTCTCAACATTCCTACTGCCTA  
TGCTGTTGACAGTGAGCGCGAGGTTGTTAATGAAGCTATATAGTGAAGCCACAGATGTATATAGCTTCATTAACAACCTCTTGCCTA  
TGCTGTTGACAGTGAGCGCCGGCTGCTCATTAAACAAGGAATAGTGAAGCCACAGATGTATTCCTTGTTAATGAGCAGCCGTTGCCTA  
TGCTGTTGACAGTGAGCGCTGGCTAAATCAAATTAACCTATAGTGAAGCCACAGATGTATAGGTTAATTTGATTTAGCCATTGCCTA  
TGCTGTTGACAGTGAGCGATACAAAATAGAACTTCACCCAATAGTGAAGCCACAGATGTATTGGGTGAAGTTCTATTTGTAGTGCCTA  
TGCTGTTGACAGTGAGCGCAGAGACCTTGCTTATTAGAAAATAGTGAAGCCACAGATGTATTTCTAATAAGCAAGTCTCTTTGCCTA  
TGCTGTTGACAGTGAGCGAACGGGACCTTTGTAACAGCTATAGTGAAGCCACAGATGTATAGCTGTTACAAAGGTCCCGTGTGCCTA  
TGCTGTTGACAGTGAGCGACTGGATCTTATGCAGCGGGAATAGTGAAGCCACAGATGTATTCCTGCTGCATAAGATCCAGCTGCCTA  
TGCTGTTGACAGTGAGCGCCAGCTCCAACACGTTTACAAAATAGTGAAGCCACAGATGTATTTGTAAACGTGTTGGAGCTGTTGCCTA  
TGCTGTTGACAGTGAGCGCCACGTTTACAAACATGAACCATAGTGAAGCCACAGATGTATGGTTCATGTTTGTAAACGTGTTGCCTA  
TGCTGTTGACAGTGAGCGCATCTAGCATGTTGATCGGTAATAGTGAAGCCACAGATGTATTACCGATCAACATGCTAGATTTGCCTA

TGCTGTTGACAGTGAGCGAGAGGGACATGGGAAATATTAATAGTGAAGCCACAGATGTATTAATATTTCCCATGTCCCTCCTGCCTA  
TGCTGTTGACAGTGAGCGCAAGAGTTACAGCGCTTCATTATAGTGAAGCCACAGATGTATAATGAAGCGCTGTAACCTTTTTGCCTA  
TGCTGTTGACAGTGAGCGCTCCGCTGCTCAAGATCCCTAATAGTGAAGCCACAGATGTATTAGGGATCTTGAGCAGCGGAATGCCTA  
TGCTGTTGACAGTGAGCGAAAGCACTTTGATATTTCTGATTAGTGAAGCCACAGATGTAATCAGAAATATCAAAGTGCTTCTGCCTA  
TGCTGTTGACAGTGAGCGCCTGCCAGCTTTAGCAGGAAATAGTGAAGCCACAGATGTATTTCCCTGCTAAAGCTGGGCAGATGCCTA  
TGCTGTTGACAGTGAGCGCAAGCAGGGCACTAACGGGAAATAGTGAAGCCACAGATGTATTTCCCGTTAGTGCCCTGCTTTTTGCCTA  
TGCTGTTGACAGTGAGCGCATGAGTAATTGGGATTTGATATAGTGAAGCCACAGATGTATATCAAATCCCAATTACTCATATGCCTA  
TGCTGTTGACAGTGAGCGAAAGGCAATTATCCTGATTGTATAGTGAAGCCACAGATGTATACAATCAGGATAAATGCCTTCTGCCTA  
TGCTGTTGACAGTGAGCGACCCGAGATCTTTCGACCCACCATAGTGAAGCCACAGATGTATGGTGGGTCTGAAGATCTCGGGCTGCCTA  
TGCTGTTGACAGTGAGCGCCGAAACATGTTTGTAGAGGATAGTGAAGCCACAGATGTATCCTCTACAAACATGTTTCCGTTGCCTA  
TGCTGTTGACAGTGAGCGATGCAGTGCATGTTTCGTATAAATAGTGAAGCCACAGATGTATTATACGAAACATGCACTGCACTGCCTA  
TGCTGTTGACAGTGAGCGACAGAAGCTCCCAATGCAATAAATAGTGAAGCCACAGATGTATTATTGCATTGGGAGCTTCTGGTGCCTA  
TGCTGTTGACAGTGAGCGACAGCTTGAAGGTACTAAAGAATAGTGAAGCCACAGATGTATTTCTTTAGTACCTTCAAGCTGGTGCCTA  
TGCTGTTGACAGTGAGCGACTTGAAGGTACTAAAGAAATATAGTGAAGCCACAGATGTATATTTCTTTAGTACCTTCAAGCTGCCTA  
TGCTGTTGACAGTGAGCGCTAGCCCGGAGTTGACAAAGAATAGTGAAGCCACAGATGTATTTCTTTGTCAACTCCGGGCTATTGCCTA  
TGCTGTTGACAGTGAGCGCCACGTACAAGTGTTCACTTTATAGTGAAGCCACAGATGTATAAAGTGAACACTTGTACGTGATGCCTA  
TGCTGTTGACAGTGAGCGACTCCAGTCTGAGCAAGTCTTATAGTGAAGCCACAGATGTATAAGACTTGCTCAGACTGGAGGTGCCTA  
TGCTGTTGACAGTGAGCGCTGCAACGAGAATGGTATACAATAAGTGAAGCCACAGATGTATTGTATAACCATTCTCGTTGCATTGCCTA  
TGCTGTTGACAGTGAGCGAATGAAAGATATTGATGTCTTATAGTGAAGCCACAGATGTATAAGACATCAATATCTTTCATCTGCCTA  
TGCTGTTGACAGTGAGCGCAAGCTATTGGCGAGAATTAATAGTGAAGCCACAGATGTATTTAATTCTCGCCAATAGCTTATGCCTA  
TGCTGTTGACAGTGAGCGACACAGGTTGATTTACAAGCTATAGTGAAGCCACAGATGTATAGCTTGTAAATCAACCTGTGGTGCCTA  
TGCTGTTGACAGTGAGCGACAGTGTATTTCATGGTACTCTATAGTGAAGCCACAGATGTATAGAGTACCATGAATACACTGGTGCCTA  
TGCTGTTGACAGTGAGCGACAGGAAAGACTTACCAGAATATAGTGAAGCCACAGATGTATATTTCTGGTAAGTCTTTCCTGGTGCCTA  
TGCTGTTGACAGTGAGCGCTACCAGAATACTATGAATTAATAGTGAAGCCACAGATGTATTAATTCATAGTATTTCTGGTAATGCCTA  
TGCTGTTGACAGTGAGCGCCAGAAGCAAGTGAAGTGAATAGTGAAGCCACAGATGTATATCAGTTCCACTTGCTTCTGATGCCTA  
TGCTGTTGACAGTGAGCGATGGGTGGATAGTATATTTCTATAGTGAAGCCACAGATGTATAGAAATATACTATCCACCCACTGCCTA  
TGCTGTTGACAGTGAGCGAAAGGTAGAGTATGTCATCAAATAGTGAAGCCACAGATGTATTTGATGACATACTCTACCTTCTGCCTA  
TGCTGTTGACAGTGAGCGCCTGATGAACACTATTATGCAATAGTGAAGCCACAGATGTATTGCATAATAGTGTTCATCAGTTGCCTA  
TGCTGTTGACAGTGAGCGCCAGGCTTGATGGAACCACAAATAGTGAAGCCACAGATGTATTTGTGGTTCCATCAAGCCTGATGCCTA  
TGCTGTTGACAGTGAGCGACTCCGTCAAGGTGAAGATCAATAGTGAAGCCACAGATGTATTGATCTTTCACCTTGACGGAGCTGCCTA  
TGCTGTTGACAGTGAGCGCCTGGAGTCAGACAGTAATAAATAGTGAAGCCACAGATGTATTTATTACTGTCTGACTCCAGTTGCCTA  
TGCTGTTGACAGTGAGCGATTGATAGGAGATAAAGAGCAATAGTGAAGCCACAGATGTATTGCTCTTTATCTCCTATCAAGTGCCTA  
TGCTGTTGACAGTGAGCGCCTGGAGATACTTAGTTATAGATAGTGAAGCCACAGATGTATCTATAACTAAGTATCTCCAGTTGCCTA

TGCTGTTGACAGTGAGCGCCAGCTTGGTTGTGTAATTAATTAGTGAAGCCACAGATGTAATTAATTACACAACCAAGCTGATGCCTA  
TGCTGTTGACAGTGAGCGCTAGTAGCAAGATGGAGTATAATAGTGAAGCCACAGATGTATTATACTCCATCTTGCTACTAATGCCTA  
TGCTGTTGACAGTGAGCGCCACATCATTGTATAAAGTTTATAGTGAAGCCACAGATGTAAAACCTTATACAAATGATGTGTTGCCTA  
TGCTGTTGACAGTGAGCGAAACAGCGTCCATGCCATTGAATAGTGAAGCCACAGATGTATTCAATGGCATGGACGCTGTTGTGCCTA  
TGCTGTTGACAGTGAGCGAAAGGACGACTGGAACAAAGTATAGTGAAGCCACAGATGTATACTTTGTTCCAGTCGTCCTTGTGCCTA  
TGCTGTTGACAGTGAGCGACACGTGCGTAAGGTGGAAGAAATAGTGAAGCCACAGATGTATTCTTCGACCTTACGCACGTGGTGCCTA  
TGCTGTTGACAGTGAGCGACCGATAGTTGATCCTGAGAAATAGTGAAGCCACAGATGTATTTCTCAGGATCAACTATCGGGTGCCTA  
TGCTGTTGACAGTGAGCGCCCGCGCCTTGTCCAAATATGATAGTGAAGCCACAGATGTATCATATTTGGACAAGGCCGCTTGCCTA  
TGCTGTTGACAGTGAGCGAAAGCACTGTGGCAGTATATATAGTGAAGCCACAGATGTATAATATACTGCCACAGTGCTTGTGCCTA  
TGCTGTTGACAGTGAGCGCCACCTGTTATCCCGTCCTGTATAGTGAAGCCACAGATGTATACAGGACGGGATAACAGGTGATGCCTA  
TGCTGTTGACAGTGAGCGCTAGGACCTCTAGATAGTGTATATAGTGAAGCCACAGATGTATAACACTATCTAGAGGTCTATTGCCTA  
TGCTGTTGACAGTGAGCGACTCCTAGCATTTGAGAGGAAATAGTGAAGCCACAGATGTATTTCTCTCAAATGCTAGGAGGTGCCTA  
TGCTGTTGACAGTGAGCGCAACAGATGGGTTCCAAGTGAATAGTGAAGCCACAGATGTATTCACCTTGAACCCATCTGTTTTGCCTA  
TGCTGTTGACAGTGAGCGAATGAGACGATTGAGTCCATAATAGTGAAGCCACAGATGTATTATGGACTCAATCGTCTCATGTGCCTA  
TGCTGTTGACAGTGAGCGCCACCTAGGAGCCCGTGAACAATAGTGAAGCCACAGATGTATTGTTTCACGGGCTCCTAGGTGTTGCCTA  
TGCTGTTGACAGTGAGCGCAAAGGTCACGTAACAGACAAATAGTGAAGCCACAGATGTATTTGTCTGTTACGTGACCTTTATGCCTA  
TGCTGTTGACAGTGAGCGACTCAGAGCTGAGATTAATCAATAGTGAAGCCACAGATGTATTGATTAATCTCAGCTCTGAGGTGCCTA  
TGCTGTTGACAGTGAGCGCCCCATCATTCTCTGAGAACTATAGTGAAGCCACAGATGTATAGTTCTCAGAGAATGATGGGTTGCCTA  
TGCTGTTGACAGTGAGCGACAGAATCGACTCTTCCAAATATAGTGAAGCCACAGATGTATATTTGGAAGAGTCGATTCTGCTGCCTA  
TGCTGTTGACAGTGAGCGACAGGAGTTCTCTTACAGGGTATAGTGAAGCCACAGATGTATACCCTGTAAGAGAACTCCTGGTGCCTA  
TGCTGTTGACAGTGAGCGAACGATAGATGGCAGAGCTTAATAGTGAAGCCACAGATGTATTAAGCTCTGCCATCTATCGTGTGCCTA  
TGCTGTTGACAGTGAGCGACACCCTATCACCAAAGACTTATAGTGAAGCCACAGATGTATAAGTCTTTGGTGATAGGGTGGTGCCTA  
TGCTGTTGACAGTGAGCGACACCATCTATTTAATAAGGGATAGTGAAGCCACAGATGTATCCCTTATTAATAGATGGTGGTGCCTA  
TGCTGTTGACAGTGAGCGACCCAAATATAATTGTGCTAGATAGTGAAGCCACAGATGTATCTAGCACAATTATATTTGGGGTGCCTA  
TGCTGTTGACAGTGAGCGCCACAGCAAGAATCTGGCCAATAGTGAAGCCACAGATGTATTGGCCAGAATCTTGCTGTGATGCCTA  
TGCTGTTGACAGTGAGCGACCCGAATGTCATTGTGACCTATAGTGAAGCCACAGATGTATAGGTCACAATGACATTCGGGCTGCCTA  
TGCTGTTGACAGTGAGCGCCACGTTTCAGCTCTGACCTTGATAGTGAAGCCACAGATGTATCAAGGTCAGAGCTGAACGTGATGCCTA  
TGCTGTTGACAGTGAGCGAATGGCATGAGTTCACAGAAATATAGTGAAGCCACAGATGTATATTTGTGAACTCATGCCATGTGCCTA  
TGCTGTTGACAGTGAGCGCCGGGAATGCAGTTGTCTTAAATAGTGAAGCCACAGATGTATTTAAGACAACCTGCATTCCTGGTGCCTA  
TGCTGTTGACAGTGAGCGCCTGGAGTCCAATATTAGCAAATAGTGAAGCCACAGATGTATTTGCTAATATTGGACTCCAGATGCCTA  
TGCTGTTGACAGTGAGCGACCAGGCATCATAAACAGCAATAGTGAAGCCACAGATGTATTGCTGTTTATGATCGCCTGGCTGCCTA  
TGCTGTTGACAGTGAGCGCGAGCAGAACCATTACAATAAATAGTGAAGCCACAGATGTATTTATGTAATGGTCTGCTCTGCCTA  
TGCTGTTGACAGTGAGCGCTTCGATTTCCCTGATGACCAATAGTGAAGCCACAGATGTATTGGTCATCAGGGAAATCGAAATGCCTA

TGCTGTTGACAGTGAGCGCCAGTATGAAGCATGTCTTAAATAGTGAAGCCACAGATGTATTTAAGACATGCTTCATACTGATGCCTA  
TGCTGTTGACAGTGAGCGACAGTATCTAAAGGCTGCTTTATAGTGAAGCCACAGATGTATAAAGCAGCCTTTAGATACTGGTGCCTA  
TGCTGTTGACAGTGAGCGCTAGTCTTGATTATAAATGAATAGTGAAGCCACAGATGTATTC AATTATAATACAAGACTAATGCCTA  
TGCTGTTGACAGTGAGCGCTACAATATCCTGCTTCCTTAATAGTGAAGCCACAGATGTATTAAGGAAGCAGGATATTGTAATGCCTA  
TGCTGTTGACAGTGAGCGCTTCATTAAGACTGGTGATATATAGTGAAGCCACAGATGTATATATACCAGTCTTAATGAAATGCCTA  
TGCTGTTGACAGTGAGCGACAGCTGTGAGACGGGAATCAATAGTGAAGCCACAGATGTATTGATTCCCCTCTCACAGCTGCTGCCTA  
TGCTGTTGACAGTGAGCGACTCCTATTGACTGGCTATTAATAGTGAAGCCACAGATGTATTAATAGCCAGTCAATAGGAGCTGCCTA  
TGCTGTTGACAGTGAGCGAATGACAGATTGTGCTCTATAATAGTGAAGCCACAGATGTATTATAGAGCACAATCTGTCATCTGCCTA  
TGCTGTTGACAGTGAGCGCCAGATTGTGCTCTATAAATTTATAGTGAAGCCACAGATGTATAAATTTATAGAGCACAATCTGTTGCCTA  
TGCTGTTGACAGTGAGCGCTCCGACCAGCGTGATGTTGAATAGTGAAGCCACAGATGTATTC AACATCACGCTGGTCGGAATGCCTA  
TGCTGTTGACAGTGAGCGACAAGAATATAATGAAGGTCTATAGTGAAGCCACAGATGTATAGACCTTCATTATATTTCTTGGTGCCTA  
TGCTGTTGACAGTGAGCGACAGCTATGACTCCACCATCAATAGTGAAGCCACAGATGTATTGATGGTGGAGTCATAGCTGGTGCCTA  
TGCTGTTGACAGTGAGCGCCAGGAAATGCTGCCCTAGTATAGTGAAGCCACAGATGTATACTAGGGCAGCAATTTCTGTTGCCTA  
TGCTGTTGACAGTGAGCGATAGGATAATGATTAGACATGATAGTGAAGCCACAGATGTATCATGTCTAATCATTATCCTACTGCCTA  
TGCTGTTGACAGTGAGCGCTGGGCTTAAACTGCTCACAAATAGTGAAGCCACAGATGTATTTGTGAGCAGTTTAAAGCCATTGCCTA  
TGCTGTTGACAGTGAGCGACACCAGAATGACGATGTGAATAGTGAAGCCACAGATGTATTCAGCATCGTCATTCTGGTGGTGCCTA  
TGCTGTTGACAGTGAGCGCCAGCTTGGATCCTCCCATCAATAGTGAAGCCACAGATGTATTGATGGGAGGATCCAAGCTGATGCCTA  
TGCTGTTGACAGTGAGCGCCTCCTTACTCTCAACATGAATAGTGAAGCCACAGATGTATTCATGTTGAGAGTCAAGGAGATGCCTA  
TGCTGTTGACAGTGAGCGCCGGGATCTGATGAATAAAGGATAGTGAAGCCACAGATGTATCCTTTATTCATCAGATCCCGATGCCTA  
TGCTGTTGACAGTGAGCGAAAGATCTATATTGATAAGAAATAGTGAAGCCACAGATGTATTTCTTATCAATATAGATCTTCTGCCTA  
TGCTGTTGACAGTGAGCGCCTCGCTGGTGATCAACCTAAATAGTGAAGCCACAGATGTATTTAGGTTGATCACCAGCGAGTTGCCTA  
TGCTGTTGACAGTGAGCGACCCGAGGGCTTCTTTGAACAATAGTGAAGCCACAGATGTATTGTTCAAAGAAGCCCTCGGGGTGCCTA  
TGCTGTTGACAGTGAGCGACTGAAGAATCAGACTATTCTATAGTGAAGCCACAGATGTATAGAATAGTCTGATTCTTCAGCTGCCTA  
TGCTGTTGACAGTGAGCGAAAGGTCTTTGTCTATATCAATAGTGAAGCCACAGATGTATTGATATAGACAAAGGACCTTGTGCCTA  
TGCTGTTGACAGTGAGCGACAGGTGTACAACGTATTCATATAGTGAAGCCACAGATGTATATGAATACGTTGTACACCTGCTGCCTA  
TGCTGTTGACAGTGAGCGAAAGAAACGAGTCCGTATTGAATAGTGAAGCCACAGATGTATTCAATACGGACTCGTTTCTTGTGCCTA  
TGCTGTTGACAGTGAGCGACCCATCAGGCATTGCACTTAATAGTGAAGCCACAGATGTATTAAGTGCAATGCCTGATGGGCTGCCTA  
TGCTGTTGACAGTGAGCGCCAGAGCTGAGATACCAGCTATAGTGAAGCCACAGATGTATAGGCTGGTATCTCAGCTCTGATGCCTA  
TGCTGTTGACAGTGAGCGCAAGGGTCAGAACCAATGTAATAGTGAAGCCACAGATGTATTACATTGGGTTCTGACCCTTTTGCCTA  
TGCTGTTGACAGTGAGCGCCAGAGACAAATAAGTGCTGAATAGTGAAGCCACAGATGTATTCAGCACTTATTTGTCTCTGATGCCTA  
TGCTGTTGACAGTGAGCGATTGAATATTCTCAGGTTTAAATAGTGAAGCCACAGATGTATTAACCTGAGAATAAATCAAGTGCCTA  
TGCTGTTGACAGTGAGCGCAAGTATGGTTTCATAGATTAATAGTGAAGCCACAGATGTATTAATCTATGAAACCATACTTTTGCCTA  
TGCTGTTGACAGTGAGCGCAAGGAAGTAATTGAACGCTTTTAGTGAAGCCACAGATGTAAAAGCGTTCAATTACTTTCCTTTTGCCTA

TGCTGTTGACAGTGAGCGAAGCCAAGATAGTTGCAACAAATAGTGAAGCCACAGATGTATTTGTTGCAACTATCTTGCTCTGCCTA  
TGCTGTTGACAGTGAGCGACTGAGGCTAATTGTTGGTAAATAGTGAAGCCACAGATGTATTTACCAACAATTAGCCTCAGCTGCCTA  
TGCTGTTGACAGTGAGCGCCTCATTGTTCTGGAGAACTAATAGTGAAGCCACAGATGTATTAGTTCTCCAGAACAATGAGTTGCCTA  
TGCTGTTGACAGTGAGCGACACCTTCGTTTCAGCACTGGAATAGTGAAGCCACAGATGTATTCAGTCTGAACGAAGGTGGTGCCTA  
TGCTGTTGACAGTGAGCGATTTCATCAACCATGACTGCAAAATAGTGAAGCCACAGATGTATTTGCAGTCATGGTTGATGAAGTGCCTA  
TGCTGTTGACAGTGAGCGCATGAGCACTGTGAATGTATATAGTGAAGCCACAGATGTATATAGCATTACAGTGCTCATTTCGCCTA  
TGCTGTTGACAGTGAGCGACTGGCAGTTTCCAGTAATGAATAGTGAAGCCACAGATGTATTCATTACTGGAAACTGCCAGGTGCCTA  
TGCTGTTGACAGTGAGCGATAGGATAGATGTTTCAATCAATAGTGAAGCCACAGATGTATTGATTGAAACATCTATCCTAGTGCCTA  
TGCTGTTGACAGTGAGCGATCGGAGTTTCTTGAATCTGAATAGTGAAGCCACAGATGTATTCAGATTCAAGAACTCCGACTGCCTA  
TGCTGTTGACAGTGAGCGATAGGTGTAGAATTATTGCTTATAGTGAAGCCACAGATGTATAAGCAATAATTCTACACCTACTGCCTA  
TGCTGTTGACAGTGAGCGCTAAATGTTTATTTGAAATCAATAGTGAAGCCACAGATGTATTGATTTCAAATAAACATTTAATGCCTA  
TGCTGTTGACAGTGAGCGACTCAGTGAATTAGAAGTCAATAGTGAAGCCACAGATGTATTGACTTCTAATTCCTACTGAGCTGCCTA  
TGCTGTTGACAGTGAGCGCCGGGCACATGAGGACAAAATAATAGTGAAGCCACAGATGTATTATTTGTCCTCATGTGCCCGATGCCTA  
TGCTGTTGACAGTGAGCGAAAAGATATTTGTACAGCTAAAATAGTGAAGCCACAGATGTATTTAGCTGTACAAATATCTTTCTGCCTA  
TGCTGTTGACAGTGAGCGAAACATGTAATTTCTGATTAATAGTGAAGCCACAGATGTATTTAATCAGAAATTACATGTTCTGCCTA  
TGCTGTTGACAGTGAGCGCAACAAAGTCGTTTACACCAAATAGTGAAGCCACAGATGTATTTGGTGTAAACGACTTTGTTTTGCCTA  
TGCTGTTGACAGTGAGCGACCCAGAAGTTGTGAAACTGAATAGTGAAGCCACAGATGTATTCAGTTTCACAACTTCTGGGGTGCCTA  
TGCTGTTGACAGTGAGCGCTCGTCTGTGGATGTAAAGAAAATAGTGAAGCCACAGATGTATTTCTTTACATCCACAGACGAATGCCTA  
TGCTGTTGACAGTGAGCGACCGAAGTGTGCCAACAAAGATATAGTGAAGCCACAGATGTATATCTTGTGGCACACTTCGGGTGCCTA  
TGCTGTTGACAGTGAGCGACCGCAGCATGTTGCTGAAGAATAGTGAAGCCACAGATGTATTCCTCAGCAACATGCTGCGGGTGCCTA  
TGCTGTTGACAGTGAGCGACCGCTCATGAGGGACTTCAATAGTGAAGCCACAGATGTATTGAAGTCCCTCATGAGGCGGCTGCCTA  
TGCTGTTGACAGTGAGCGACTGGGTTACTTGCAAACATTATAGTGAAGCCACAGATGTATAATGTTTGCAAGTAAACCAGGTGCCTA  
TGCTGTTGACAGTGAGCGATGCGAGATATTCATAGTGAATAGTGAAGCCACAGATGTATTACACTATGAATATCTCGCACTGCCTA  
TGCTGTTGACAGTGAGCGCCCCATTCAAATCCTGAGTTAATAGTGAAGCCACAGATGTATTAAGTCCCTCATGAGGCGGCTGCCTA  
TGCTGTTGACAGTGAGCGAAACTAAGTTATTGCTGCATAATAGTGAAGCCACAGATGTATTATGCAGCAATAACTTAGTTCTGCCTA  
TGCTGTTGACAGTGAGCGCCACAGTATTGTAGAAAGCTAATAGTGAAGCCACAGATGTATTAGCTTTCTACAATACTGTGTTGCCTA  
TGCTGTTGACAGTGAGCGCATGCCCTTCAAATAGTATAGAATAGTGAAGCCACAGATGTATTCATACTATTTGAAGGCATATGCCTA  
TGCTGTTGACAGTGAGCGCCACAAACAGACGCTTACATAATAGTGAAGCCACAGATGTATTATGTAAGCGTCTGTTTGTGTTGCCTA  
TGCTGTTGACAGTGAGCGCAACAGACGCTTACATAATTAATAGTGAAGCCACAGATGTATTAATTATGTAAGCGTCTGTTTTGCCTA  
TGCTGTTGACAGTGAGCGACTCGTCATCTTCGTCCTCCAATAGTGAAGCCACAGATGTATTGGAGGACGAAGATGACGAGGTGCCTA  
TGCTGTTGACAGTGAGCGCAAAGAGTAGGCTATTTCTATATAGTGAAGCCACAGATGTATATAGAAATAGCCTACTCTTTATGCCTA  
TGCTGTTGACAGTGAGCGCCAGCTTAAATTTGTATAGGTATAGTGAAGCCACAGATGTATACCTATACAAATTTAAGCTGATGCCTA  
TGCTGTTGACAGTGAGCGCAAAGGAAACAATGGTATTTAATAGTGAAGCCACAGATGTATTAATACCATTGTTTCTTTTTGCCTA

TGCTGTTGACAGTGAGCGCCACCATGTAGTTAATGTATTTTAGTGAAGCCACAGATGTAAAATACATTAAC TACATGGTGTGCCTA  
TGCTGTTGACAGTGAGCGATGCATTTGTGCTAATAAACAATAGTGAAGCCACAGATGTATTGTTTATTAGCACAAATGCAGTGCCTA  
TGCTGTTGACAGTGAGCGCCTGGCCGAGGAACTGGACTATAGTGAAGCCACAGATGTATAGTCCAGTTTCTCGGCCAGTTGCCTA  
TGCTGTTGACAGTGAGCGAACTGACTACATTTAGTAATATAGTGAAGCCACAGATGTATATTAATAATGTAGTCAGTTGTGCCTA  
TGCTGTTGACAGTGAGCGACAGCATGAAGCCTCATTGGTATAGTGAAGCCACAGATGTATACCAATGAGGCTTCATGCTGGTGCCTA  
TGCTGTTGACAGTGAGCGCATCTACAAATGCTCTAATTAATAGTGAAGCCACAGATGTATTAATTAGAGCATTGTAGATATGCCTA  
TGCTGTTGACAGTGAGCGCTCGGCGAAGATCACCACATATAGTGAAGCCACAGATGTATATGTGGTGATCTTCCGCCAATGCCTA  
TGCTGTTGACAGTGAGCGCGTGAATGATTATCAAGTTATATAGTGAAGCCACAGATGTATATAACTTGATAATCATTCACTGCCTA  
TGCTGTTGACAGTGAGCGACAGGGTCATTCATGAAGTTTATAGTGAAGCCACAGATGTATAAACTTCATGAATGACCCTGCTGCCTA  
TGCTGTTGACAGTGAGCGCCACGACCCATTTCTTCTATATAGTGAAGCCACAGATGTATATAGGAAGAAATGGGTCGTGTGCCTA  
TGCTGTTGACAGTGAGCGCCTGCTTCATGTGTAAGACTATAGTGAAGCCACAGATGTATAGTCTTTACACATGAAGCAGTTGCCTA  
TGCTGTTGACAGTGAGCGACTGAGTAAGAATTGAACAGTATAGTGAAGCCACAGATGTATACTGTTCAATTCTTACTCAGCTGCCTA  
TGCTGTTGACAGTGAGCGACAGTCATGTGAAGGAAATTAATAGTGAAGCCACAGATGTATTAATTTCTTCCATGACTGCTGCCTA  
TGCTGTTGACAGTGAGCGCAAGGGTCGCTGTTAAAGATAAATAGTGAAGCCACAGATGTATTATCTTTAACAGCGACCCTTTGCCTA  
TGCTGTTGACAGTGAGCGCAGGGTCGCTGTTAAAGATAAATAGTGAAGCCACAGATGTATTTATCTTTAACAGCGACCCTTTGCCTA  
TGCTGTTGACAGTGAGCGACCCGGAGACTAGGAAACGTAATAGTGAAGCCACAGATGTATTACGTTTCTTAGTCTCCGGGGTGCCTA  
TGCTGTTGACAGTGAGCGCTTCTTTGTTTGCAGTAATTAATAGTGAAGCCACAGATGTATTAATTAAGTCAAAACAAAGAATTGCCTA  
TGCTGTTGACAGTGAGCGAAAGGCTACAATGGAAGAATTATAGTGAAGCCACAGATGTATAAATCTTCCATTGTAGCCTTGTGCCTA  
TGCTGTTGACAGTGAGCGATAACAATGGAAGAATTACTCAATAGTGAAGCCACAGATGTATTGAGTAATTTCCATTGTAGTGCCTA  
TGCTGTTGACAGTGAGCGACAGAATGATTTCCAGACCAAATAGTGAAGCCACAGATGTATTTGGTCTGGAAATCATTCCTGGTGCCTA  
TGCTGTTGACAGTGAGCGCCAACCTCTTATTGGAAGATTATAGTGAAGCCACAGATGTATAAATCTTCCAATAAGAGGTTGATGCCTA  
TGCTGTTGACAGTGAGCGCCAGACTATGAGTCTAGTTTAAATAGTGAAGCCACAGATGTATTAAGTCAACTCATAGTCTGTTGCCTA  
TGCTGTTGACAGTGAGCGACAACCTCAGGATGCTATTAATAGTGAAGCCACAGATGTATTTAATAGCATCTGAGGTTGGTGCCTA  
TGCTGTTGACAGTGAGCGAAACCAGCTCATTATTGTAGTATAGTGAAGCCACAGATGTATACTACAATAATGAGCTGGTTCTGCCTA  
TGCTGTTGACAGTGAGCGCTACATTAGTAAGTGAATCAATAGTGAAGCCACAGATGTATTGATTTCACTTACTAATGTAATGCCTA  
TGCTGTTGACAGTGAGCGAAACTGCTTGGATAAACCTAAATAGTGAAGCCACAGATGTATTTAGGTTTATCCAAGCAGTTGTGCCTA  
TGCTGTTGACAGTGAGCGCTACCGGAAGTGTGACAAGATATAGTGAAGCCACAGATGTATATCTTGTCACTTCCGGTATTGCCTA  
TGCTGTTGACAGTGAGCGATCGAATCAAAGTGCCCAACTATAGTGAAGCCACAGATGTATAGTTGGGCACTTTGATTCGAGTGCCTA  
TGCTGTTGACAGTGAGCGATTGATCGTGTTCGCATGAAATAGTGAAGCCACAGATGTATTTGATGCGAACACGACTGAACTGCCTA  
TGCTGTTGACAGTGAGCGATAGCGTGGTCATCAGATTCATATAGTGAAGCCACAGATGTATAGAATCTGATGACCACGCTACTGCCTA  
TGCTGTTGACAGTGAGCGCAGCGTGGTCATCAGATTCATTAATAGTGAAGCCACAGATGTATTAGAATCTGATGACCACGCTATGCCTA  
TGCTGTTGACAGTGAGCGACTGGTGCACCTCCTATCTGAATAGTGAAGCCACAGATGTATTCAGATAGGAGGTGCACCAGGTGCCTA  
TGCTGTTGACAGTGAGCGCCTGGTATCACTCAGTAAGCTATAGTGAAGCCACAGATGTATAGCTTACTGAGTGATACCAGTTGCCTA



TGCTGTTGACAGTGAGCGATTGAACTCTGTTGTAGATTTATAGTGAAGCCACAGATGTATAAATCTACAACAGAGTTCAACTGCCTA  
TGCTGTTGACAGTGAGCGATTGGGCTTAGATGTTGACTAATAGTGAAGCCACAGATGTATTAGTCAACATCTAAGCCCAAGTGCCTA  
TGCTGTTGACAGTGAGCGATTGATGTTAAATGTTCCCTTTATAGTGAAGCCACAGATGTATAAAGGAACATTTAACATCAAGTGCCTA  
TGCTGTTGACAGTGAGCGCTGCCATGTTATCAGTCGTAAATAGTGAAGCCACAGATGTATTTACGACTGATAACATGGCAATGCCTA  
TGCTGTTGACAGTGAGCGACAAGCTCTTGTTAGAATAAATAGTGAAGCCACAGATGTAATTTATTCTAACAAGAGCTTGCTGCCTA  
TGCTGTTGACAGTGAGCGCCTCCTTCACAATCATACCAAATAGTGAAGCCACAGATGTATTTGGTATGATTGTGAAGGAGTTGCCTA  
TGCTGTTGACAGTGAGCGCCACAATCATACCAAACCTAAATAGTGAAGCCACAGATGTATTTAAGTTTGGTATGATTGTGATGCCTA  
TGCTGTTGACAGTGAGCGCCAAGCATATCAAGGTGAATAATAGTGAAGCCACAGATGTATTATTACCTTGATATGCTTGTGCCTA  
TGCTGTTGACAGTGAGCGAAAGCATATCAAGGTGAATAAATAGTGAAGCCACAGATGTATTTATTACCTTGATATGCTTGTGCCTA  
TGCTGTTGACAGTGAGCGCATCAGCTTGTATGAAACTCAATAGTGAAGCCACAGATGTATTGAGTTTCATACAAGCTGATTTGCCTA  
TGCTGTTGACAGTGAGCGCCTGACTATTACCATTAGAAAATAGTGAAGCCACAGATGTATTTCTGAATGGTAATAGTCAGTTGCCTA  
TGCTGTTGACAGTGAGCGACTCACCCGAGATTAACCTAAATAGTGAAGCCACAGATGTATTTAGTTAATCTCGGGTGAGCTGCCTA  
TGCTGTTGACAGTGAGCGCTACCTCTAAGACGGAAGTCAATAGTGAAGCCACAGATGTATTGACTTCCGTCTTAGAGGTAATGCCTA  
TGCTGTTGACAGTGAGCGCACGAAGGGTATTGGTAACAAAATAGTGAAGCCACAGATGTATTTGTTACCAATACCCTTCGTTGCCTA  
TGCTGTTGACAGTGAGCGCTTGAGGATCTTTGCAAAGTTATAGTGAAGCCACAGATGTATAACTTTGCAAAGATCCTCAAATGCCTA  
TGCTGTTGACAGTGAGCGACAGCTGATTCTTAATACCAGATAGTGAAGCCACAGATGTATCTGGTATTAAGAATCAGCTGGTGCCTA  
TGCTGTTGACAGTGAGCGCACCCATGAATCCCATTTGCAAATAGTGAAGCCACAGATGTATTGCAAATGGGATTCATGGGTATGCCTA  
TGCTGTTGACAGTGAGCGCAACCTATTTAATGTAAGATATTAGTGAAGCCACAGATGTAATATCTTACATTAATAGGTTTTGCCTA

| Mean T14/T0 | T14/T0_A    | T14/T0_B    | Reads_A_T0 | Reads_A_T14 |
|-------------|-------------|-------------|------------|-------------|
| 0.200312349 | 0.268684264 | 0.131940433 | 34133      | 9171        |
| 0.665480322 | 0.000178923 | 1.330781721 | 5589       | 1           |
| 0.053604401 | 0.0019678   | 0.105241002 | 5590       | 11          |
| 0.410099904 | 0.199787845 | 0.620411962 | 38651      | 7722        |
| 0.002146138 | 0.00204099  | 0.002251286 | 11759      | 24          |
| 0.004655918 | 0.008377548 | 0.000934288 | 3581       | 30          |
| 0.273324357 | 0.165854931 | 0.380793783 | 11498      | 1907        |
| 0.2489911   | 0.201788909 | 0.29619329  | 5590       | 1128        |
| 0.449690571 | 0.432060881 | 0.467320261 | 8147       | 3520        |
| 0.557452935 | 0.742589485 | 0.372316384 | 7152       | 5311        |
| 0.001775631 | 0.000845309 | 0.002705953 | 3549       | 3           |
| 0.234356062 | 0.322320709 | 0.146391415 | 9928       | 3200        |
| 0.056185902 | 0.070641078 | 0.041730727 | 2449       | 173         |
| 0.221138799 | 0           | 0.442277597 | 8219       | 0           |
| 0.564841845 | 0.680914972 | 0.448768717 | 17312      | 11788       |
| NA          | NA          | NA          | 908        | 0           |
| 0.274406089 | 0.334058432 | 0.214753745 | 29881      | 9982        |
| 0.625663102 | 1.012713108 | 0.238613096 | 30677      | 31067       |
| 0.035169734 | 0.012261229 | 0.058078239 | 7748       | 95          |
| 0.095823083 | 0.006448957 | 0.185197208 | 7288       | 47          |
| 0.499065664 | 0.927424983 | 0.070706346 | 11464      | 10632       |
| 0.705258812 | 0.517585507 | 0.892932117 | 235478     | 121880      |
| 0.001459856 | 0.000206825 | 0.002712886 | 4835       | 1           |
| 0.088104342 | 0.008071553 | 0.168137131 | 9168       | 74          |
| 0.195980329 | 0.234741368 | 0.15721929  | 22561      | 5296        |
| 0           | 0           | 0           | 12275      | 0           |
| 0.31947451  | 0.313544189 | 0.32540483  | 40881      | 12818       |
| 0.167683133 | 0.220091783 | 0.115274483 | 15907      | 3501        |
| NA          | NA          | NA          | 0          | 0           |
| 0.401332534 | 0.200805702 | 0.601859367 | 16135      | 3240        |
| 0.139184254 | 0.254215372 | 0.024153137 | 19334      | 4915        |
| 0.46112578  | 0.22570026  | 0.696551301 | 17315      | 3908        |

|             |             |             |        |       |
|-------------|-------------|-------------|--------|-------|
| 0.573261557 | 0.767245885 | 0.37927723  | 15308  | 11745 |
| 0.235730162 | 0.418269791 | 0.053190532 | 17154  | 7175  |
| 0.035165394 | 0.002115526 | 0.068215262 | 10872  | 23    |
| 1.241609259 | 1.460589922 | 1.022628597 | 48820  | 71306 |
| 0.059766771 | 0.009568839 | 0.109964703 | 8883   | 85    |
| 0.10962211  | 0.118078719 | 0.101165501 | 1499   | 177   |
| 0.418395785 | 0.701615799 | 0.135175771 | 13925  | 9770  |
| 0.292975143 | 0.202313712 | 0.383636573 | 14695  | 2973  |
| NA          | NA          | NA          | 207    | 21    |
| 0.42809245  | 0.550629344 | 0.305555556 | 5323   | 2931  |
| 0.069299389 | 0.09512504  | 0.043473739 | 12636  | 1202  |
| 1.831446558 | 1.40504451  | 2.257848606 | 6740   | 9470  |
| 0.590189219 | 1.1171875   | 0.063190938 | 7040   | 7865  |
| 0.366813082 | 0.684577114 | 0.049049049 | 1005   | 688   |
| 0.117667517 | 0           | 0.235335034 | 2848   | 0     |
| 0.375913898 | 0.327116212 | 0.424711584 | 27880  | 9120  |
| NA          | NA          | NA          | 0      | 0     |
| 0.296002749 | 0.122132318 | 0.469873181 | 10505  | 1283  |
| 0.026435101 | 0.00690583  | 0.045964372 | 11150  | 77    |
| 0.049530555 | 0.063099738 | 0.035961372 | 6878   | 434   |
| 0.027907605 | 0.003065917 | 0.052749293 | 19570  | 60    |
| 6.47165E-05 | 0.000129433 | 0           | 7726   | 1     |
| 2.922281386 | 4.477807971 | 1.366754801 | 17664  | 79096 |
| 0           | 0           | 0           | 5448   | 0     |
| 0.443498086 | 0.657270086 | 0.229726085 | 26499  | 17417 |
| 0.260352231 | 0.308840206 | 0.211864257 | 121694 | 37584 |
| 0.60032482  | 0.359381765 | 0.841267876 | 23098  | 8301  |
| 0.005067342 | 0           | 0.010134685 | 7318   | 0     |
| 0           | 0           | 0           | 4630   | 0     |
| 0.149038652 | 0.070833921 | 0.227243383 | 7087   | 502   |
| 0.128457676 | 0.106936416 | 0.149978936 | 14186  | 1517  |
| 0.147861249 | 0.264325323 | 0.031397174 | 2705   | 715   |
| 0.396582444 | 0.600036694 | 0.193128195 | 21802  | 13082 |

|             |             |             |        |        |
|-------------|-------------|-------------|--------|--------|
| 0.356515297 | 0.533129237 | 0.179901356 | 9146   | 4876   |
| 4.974521294 | 2.266989851 | 7.682052736 | 22072  | 50037  |
| 0.05387472  | 0.096820809 | 0.01092863  | 20760  | 2010   |
| 0.837321391 | 1.529071015 | 0.145571768 | 4661   | 7127   |
| 0.008388288 | 0.015122511 | 0.001654064 | 10448  | 158    |
| 0.824053234 | 1.06458435  | 0.583522118 | 12294  | 13088  |
| 0.024491203 | 0.008743956 | 0.04023845  | 9721   | 85     |
| 0.010416667 | 0           | 0.020833333 | 3823   | 0      |
| 0           | 0           | 0           | 2783   | 0      |
| 0.125188349 | 0.175752051 | 0.074624647 | 5485   | 964    |
| 0.507940486 | 0.356679709 | 0.659201262 | 17890  | 6381   |
| 2.159026811 | 3.284734348 | 1.033319275 | 8018   | 26337  |
| 0.64349492  | 0.507178218 | 0.779811623 | 4040   | 2049   |
| 0.080389068 | 0.05529467  | 0.105483466 | 8518   | 471    |
| 0.000639494 | 0.000888362 | 0.000390625 | 3377   | 3      |
| 0.360095959 | 0.069445862 | 0.650746056 | 19598  | 1361   |
| 0.016297649 | 0.018375115 | 0.014220183 | 7619   | 140    |
| 0.14306644  | 0           | 0.286132879 | 20503  | 0      |
| 0.092709454 | 0.069620729 | 0.11579818  | 13315  | 927    |
| 0.035594283 | 0.071188567 | 0           | 22321  | 1589   |
| NA          | NA          | NA          | 148    | 0      |
| 0.118689343 | 0.122838849 | 0.114539838 | 57319  | 7041   |
| 0           | 0           | 0           | 2012   | 0      |
| 0.454904159 | 0.631757214 | 0.278051103 | 7381   | 4663   |
| 0.672354814 | 0.445185419 | 0.899524209 | 22193  | 9880   |
| 0.142000285 | 0.127547666 | 0.156452904 | 9126   | 1164   |
| 0           | 0           | 0           | 1267   | 0      |
| 0.077104921 | 0.08259276  | 0.071617083 | 19917  | 1645   |
| 0.057370498 | 0.065993919 | 0.048747077 | 29927  | 1975   |
| 0.024626408 | 0.021392709 | 0.027860107 | 9162   | 196    |
| 0.410946348 | 0.179452295 | 0.6424404   | 22786  | 4089   |
| 0.412381245 | 0.44332883  | 0.38143366  | 251680 | 111577 |
| 0.129826198 | 0.1681838   | 0.091468596 | 36692  | 6171   |

|             |             |             |       |        |
|-------------|-------------|-------------|-------|--------|
| 2.34833908  | 2.720656406 | 1.976021753 | 21572 | 58690  |
| 0.094299073 | 0.000374953 | 0.188223194 | 2667  | 1      |
| 0.480557434 | 0.680387664 | 0.280727205 | 47567 | 32364  |
| 0.041243445 | 0.031141199 | 0.051345691 | 15510 | 483    |
| 0.013231982 | 0.026463964 | 0           | 1776  | 47     |
| 22.77961486 | 42.66701779 | 2.892211933 | 8544  | 364547 |
| 0.144143286 | 0.249835634 | 0.038450937 | 7605  | 1900   |
| 0.028355134 | 0.029962547 | 0.02674772  | 1335  | 40     |
| NA          | NA          | NA          | 447   | 431    |
| 3.10945E-05 | 0           | 6.21891E-05 | 20291 | 0      |
| 0.056505575 | 0.058248337 | 0.054762814 | 45100 | 2627   |
| 0.756328621 | 1.503010235 | 0.009647007 | 3322  | 4993   |
| 0.633054482 | 0.738127854 | 0.52798111  | 4380  | 3233   |
| 0.010380898 | 0.004175644 | 0.016586151 | 59871 | 250    |
| 0           | 0           | 0           | 4366  | 0      |
| 0           | 0           | 0           | 6519  | 0      |
| 0.135273343 | 0.118396988 | 0.152149699 | 18590 | 2201   |
| 0           | 0           | 0           | 15250 | 0      |
| 0.079435576 | 0.000380084 | 0.158491069 | 7893  | 3      |
| 0.075280112 | 0           | 0.150560224 | 6127  | 0      |
| 0           | 0           | 0           | 6356  | 0      |
| 0.243856333 | 0           | 0.487712665 | 2578  | 0      |
| 0.001731885 | 0.002492331 | 0.00097144  | 10432 | 26     |
| 0.057581903 | 0.083058046 | 0.03210576  | 2119  | 176    |
| 1.091733912 | 0.589759684 | 1.593708139 | 55760 | 32885  |
| 0.57419689  | 0.919432666 | 0.228961114 | 6839  | 6288   |
| 0.458716872 | 0.142857143 | 0.774576601 | 16450 | 2350   |
| 0.245937138 | 0.37322759  | 0.118646686 | 4161  | 1553   |
| 0.134848542 | 0.001576873 | 0.268120212 | 3805  | 6      |
| 0           | 0           | 0           | 1236  | 0      |
| 0.710820484 | 1.275496689 | 0.146144279 | 1510  | 1926   |
| 0.134612189 | 0.008686441 | 0.260537937 | 4720  | 41     |
| 1.147329284 | 1.49221144  | 0.802447127 | 15664 | 23374  |

|             |             |             |       |        |
|-------------|-------------|-------------|-------|--------|
| 0           | 0           | 0           | 3121  | 0      |
| 0.118944773 | 0.131788129 | 0.106101417 | 13461 | 1774   |
| 0.142134201 | 0.070435009 | 0.213833393 | 19195 | 1352   |
| 0           | 0           | 0           | 4977  | 0      |
| 0.115344034 | 0.011380552 | 0.219307515 | 20825 | 237    |
| 1.364806716 | 0.371060327 | 2.358553106 | 9233  | 3426   |
| 0.700301215 | 1.223163842 | 0.177438588 | 2832  | 3464   |
| 0.817611719 | 0.890839629 | 0.744383809 | 69888 | 62259  |
| 0.215720626 | 0           | 0.431441252 | 3806  | 0      |
| 0.497429027 | 0.398906637 | 0.595951417 | 11707 | 4670   |
| 0.986138423 | 0.975527017 | 0.996749828 | 20635 | 20130  |
| 0           | 0           | 0           | 907   | 0      |
| 0.18203172  | 0.15420805  | 0.20985539  | 9565  | 1475   |
| 0.693812292 | 0.764903255 | 0.622721329 | 26823 | 20517  |
| 0.232529345 | 0.127116437 | 0.337942253 | 3839  | 488    |
| 0.176272377 | 0.350797267 | 0.001747488 | 2634  | 924    |
| 1.317433547 | 0.026128266 | 2.608738828 | 1684  | 44     |
| 0.628106622 | 1.114166972 | 0.142046271 | 32724 | 36460  |
| 1.362208923 | 0.193768257 | 2.530649588 | 1027  | 199    |
| 0.591043966 | 0.80244028  | 0.379647652 | 25243 | 20256  |
| 0.218502726 | 0.203358299 | 0.233647153 | 41390 | 8417   |
| 0.040584859 | 0           | 0.081169719 | 9110  | 0      |
| 0.075718892 | 0.000117758 | 0.151320026 | 8492  | 1      |
| 0.100164464 | 0.124590164 | 0.075738763 | 3050  | 380    |
| 0.080469517 | 0           | 0.160939034 | 12881 | 0      |
| 0.038731085 | 0.004728435 | 0.072733736 | 15650 | 74     |
| 0.110253195 | 0.038949338 | 0.181557052 | 14429 | 562    |
| 0.226325463 | 0.218088273 | 0.234562653 | 23518 | 5129   |
| 1.082538396 | 1.289585162 | 0.87549163  | 91120 | 117507 |
| 0           | 0           | 0           | 7650  | 0      |
| 0           | 0           | 0           | 1166  | 0      |
| 0.397909545 | 0.698496344 | 0.097322746 | 36245 | 25317  |
| 0           | 0           | 0           | 1271  | 0      |

|             |             |             |       |       |
|-------------|-------------|-------------|-------|-------|
| 0.303408945 | 0.482990787 | 0.123827104 | 5644  | 2726  |
| 0.287092522 | 0.574185043 | 0           | 8344  | 4791  |
| 0.20895781  | 0.141891892 | 0.276023728 | 11840 | 1680  |
| 0.040480317 | 0           | 0.080960634 | 3527  | 0     |
| 0.109569072 | 0.112458184 | 0.10667996  | 42149 | 4740  |
| 0.03061677  | 0.03155467  | 0.029678869 | 9539  | 301   |
| 0.119970268 | 0.110483782 | 0.129456754 | 9033  | 998   |
| 0.204016851 | 0.209087277 | 0.198946425 | 17519 | 3663  |
| 0.579893278 | 1.122087605 | 0.037698952 | 16095 | 18060 |
| 0.171659277 | 0.161353286 | 0.181965268 | 13833 | 2232  |
| 0.064918568 | 0.001997004 | 0.127840131 | 2003  | 4     |
| 0.320682295 | 0.225751283 | 0.415613308 | 8186  | 1848  |
| 0.138050187 | 0.180178767 | 0.095921607 | 12754 | 2298  |
| 0.397415785 | 0.434250439 | 0.360581131 | 18791 | 8160  |
| 0.134215951 | 0.080257186 | 0.188174716 | 39660 | 3183  |
| 0.189600975 | 0.263537572 | 0.115664379 | 21625 | 5699  |
| 0.073920542 | 0.106108526 | 0.041732558 | 44266 | 4697  |
| 0.08107178  | 0.014856739 | 0.147286822 | 5654  | 84    |
| 0.071321859 | 0.011487304 | 0.131156413 | 18194 | 209   |
| 0.289503582 | 0.42626498  | 0.152742183 | 12016 | 5122  |
| 0.044090494 | 0.030532487 | 0.057648502 | 8188  | 250   |
| 2.340233512 | 1.930658742 | 2.749808282 | 6057  | 11694 |
| 0.156093321 | 0.116246872 | 0.19593977  | 18779 | 2183  |
| 0.000158747 | 0           | 0.000317494 | 3613  | 0     |
| NA          | NA          | NA          | 0     | 0     |
| 0.039003519 | 0.018129718 | 0.059877321 | 18147 | 329   |
| 0.446854315 | 0.107456979 | 0.786251651 | 18305 | 1967  |
| 0.890171552 | 1.716215543 | 0.064127562 | 20061 | 34429 |
| 2.179569236 | 1.422986617 | 2.936151855 | 8518  | 12121 |
| 0.031951327 | 0.008029979 | 0.055872675 | 16812 | 135   |
| 1.431979693 | 1.532967033 | 1.330992354 | 27664 | 42408 |
| 0.034464804 | 0.005788154 | 0.063141455 | 5183  | 30    |
| 0.079293047 | 0.058312236 | 0.100273857 | 11850 | 691   |

|             |             |             |       |        |
|-------------|-------------|-------------|-------|--------|
| 0.706143751 | 0.96534451  | 0.446942993 | 9782  | 9443   |
| 0.621464656 | 0.915195867 | 0.327733445 | 4646  | 4252   |
| 4.781464099 | 6.785229842 | 2.777698356 | 5308  | 36016  |
| 0.778617907 | 1.132855191 | 0.424380624 | 17568 | 19902  |
| 1.176684021 | 1.753802163 | 0.599565878 | 24131 | 42321  |
| 0.554422725 | 0.923791103 | 0.185054348 | 2585  | 2388   |
| 1.1593543   | 0.786077021 | 1.532631579 | 4726  | 3715   |
| 0.240881821 | 0.481763642 | 0           | 10501 | 5059   |
| 2.777624937 | 3.217093529 | 2.338156344 | 14017 | 45094  |
| 2.352884012 | 2.797262325 | 1.908505699 | 46755 | 130786 |
| 0.046980193 | 0           | 0.093960386 | 15081 | 0      |
| 0.082319013 | 0.141659648 | 0.022978377 | 24933 | 3532   |
| 2.015703082 | 1.209699299 | 2.821706865 | 8846  | 10701  |
| 0.232392142 | 0.178955954 | 0.285828331 | 30650 | 5485   |
| 0.063600987 | 0.001541511 | 0.125660464 | 4541  | 7      |
| 0.281642373 | 0.071780078 | 0.491504669 | 11786 | 846    |
| 4.165656967 | 6.332554466 | 1.998759467 | 30386 | 192421 |
| 0.154177662 | 0.004555809 | 0.303799515 | 3512  | 16     |
| 2.081932577 | 1.782110872 | 2.381754283 | 8821  | 15720  |
| 0.186897319 | 0.248041429 | 0.125753209 | 7531  | 1868   |
| 0           | 0           | 0           | 8924  | 0      |
| 11.9485048  | 19.00330745 | 4.893702157 | 6954  | 132149 |
| 1.188115541 | 1.435698153 | 0.940532929 | 15054 | 21613  |
| 0.053391885 | 0.024676711 | 0.082107059 | 16858 | 416    |
| 3.655607969 | 4.58780241  | 2.723413529 | 10871 | 49874  |
| 16.37310333 | 22.75705636 | 9.989150297 | 10735 | 244297 |
| 0.566559532 | 0.631030822 | 0.502088243 | 64046 | 40415  |
| 1.390909314 | 2.649395911 | 0.132422717 | 4304  | 11403  |
| 0.066051589 | 0.007621849 | 0.124481328 | 14957 | 114    |
| 0.096645722 | 0.171270718 | 0.022020725 | 3801  | 651    |
| 0.615592343 | 0.666345784 | 0.564838903 | 83104 | 55376  |
| 0.47853168  | 0.342590096 | 0.614473263 | 22254 | 7624   |
| 0.024227576 | 0           | 0.048455152 | 16364 | 0      |



|             |             |             |        |        |
|-------------|-------------|-------------|--------|--------|
| 0.063713733 | 0.00804721  | 0.119380256 | 13048  | 105    |
| 0.345104593 | 0.226497717 | 0.463711468 | 10733  | 2431   |
| 0.198889771 | 0.198522247 | 0.199257294 | 24632  | 4890   |
| 0.703875338 | 0.77262223  | 0.635128445 | 22069  | 17051  |
| NA          | NA          | NA          | 270    | 6      |
| 0.14763293  | 0.098111837 | 0.197154022 | 27540  | 2702   |
| 0.42757955  | 0.089182969 | 0.765976131 | 38236  | 3410   |
| 1.398029255 | 2.142666181 | 0.65339233  | 16458  | 35264  |
| 0.216593143 | 0.00036049  | 0.432825795 | 2774   | 1      |
| 0.031108522 | 0           | 0.062217045 | 37302  | 0      |
| 0           | 0           | 0           | 1982   | 0      |
| 0.107595678 | 0.084457173 | 0.130734182 | 19205  | 1622   |
| 2.73965767  | 4.554970263 | 0.924345077 | 11770  | 53612  |
| 1.725217186 | 1.842114421 | 1.608319951 | 28736  | 52935  |
| 0.151960261 | 0.274109644 | 0.029810877 | 7497   | 2055   |
| 0.464228303 | 0.546660024 | 0.381796582 | 26093  | 14264  |
| 2.839755061 | 1.630561738 | 4.048948383 | 90754  | 147980 |
| 0.111149425 | 0           | 0.222298851 | 2759   | 0      |
| 0.190916889 | 0.103235294 | 0.278598485 | 23800  | 2457   |
| 0.051940249 | 0.10105972  | 0.002820777 | 18118  | 1831   |
| 0           | 0           | 0           | 4817   | 0      |
| 0.009228421 | 0           | 0.018456842 | 1360   | 0      |
| 0.639860874 | 0.834630621 | 0.445091128 | 107789 | 89964  |
| 0.275136367 | 0.291147084 | 0.25912565  | 12911  | 3759   |
| 0.729534649 | 0.550112191 | 0.908957107 | 10696  | 5884   |
| 0.869186931 | 1.148524754 | 0.589849108 | 11998  | 13780  |
| 0.052820647 | 0.104150504 | 0.001490789 | 15468  | 1611   |
| NA          | NA          | NA          | 308    | 0      |
| 0           | 0           | 0           | 1819   | 0      |
| 1.538125565 | 2.261141129 | 0.815110001 | 20173  | 45614  |
| 0.311123833 | 0.274834437 | 0.347413229 | 3322   | 913    |
| 0           | 0           | 0           | 7400   | 0      |
| 0.92660009  | 0.741578683 | 1.111621497 | 1989   | 1475   |

|             |             |             |       |        |
|-------------|-------------|-------------|-------|--------|
| 0.129914681 | 0.128666667 | 0.131162695 | 6000  | 772    |
| 0.313809229 | 0.308336591 | 0.319281867 | 17909 | 5522   |
| 0.584392451 | 0.593347689 | 0.575437213 | 21827 | 12951  |
| 0.631092498 | 1.048248699 | 0.213936297 | 14218 | 14904  |
| 0.211734062 | 0.293841091 | 0.129627033 | 17016 | 5000   |
| 0.133434746 | 0.188121528 | 0.078747964 | 14581 | 2743   |
| 0           | 0           | 0           | 5375  | 0      |
| 0.716286619 | 0.796963648 | 0.63560959  | 19036 | 15171  |
| 0.029501785 | 0.041323731 | 0.017679838 | 40824 | 1687   |
| 0.246827441 | 0.148140193 | 0.345514689 | 27933 | 4138   |
| 1.45400601  | 2.707134121 | 0.200877898 | 36795 | 99609  |
| 0.174185305 | 0.022923713 | 0.325446898 | 2661  | 61     |
| 0.182159211 | 0.070402494 | 0.293915929 | 14758 | 1039   |
| 1.326585139 | 1.239206534 | 1.413963743 | 15426 | 19116  |
| 0.216031756 | 0.316051389 | 0.116012124 | 19693 | 6224   |
| 1.884762179 | 2.164840532 | 1.604683826 | 61423 | 132971 |
| 0.330597641 | 0.293600259 | 0.367595023 | 18532 | 5441   |
| 0.382783292 | 0.430418838 | 0.335147745 | 5181  | 2230   |
| 0.211522228 | 0.16763608  | 0.255408376 | 23038 | 3862   |
| 0.163750658 | 0.113922928 | 0.213578389 | 78913 | 8990   |
| 0           | 0           | 0           | 3728  | 0      |
| 2.134228281 | 3.754773552 | 0.51368301  | 12674 | 47588  |
| 0.000117585 | 0.00023517  | 0           | 17009 | 4      |
| 0.448962106 | 0.525151398 | 0.372772814 | 28567 | 15002  |
| 0.120154259 | 0.044799208 | 0.19550931  | 16161 | 724    |
| 0.391040713 | 0.240246192 | 0.541835234 | 9586  | 2303   |
| 0.23467894  | 0.240075706 | 0.229282175 | 20606 | 4947   |
| 0.038002797 | 0.076005593 | 0           | 12157 | 924    |
| 0.373058626 | 0.121392815 | 0.624724436 | 13584 | 1649   |
| 0.047358662 | 0.093162219 | 0.001555105 | 14727 | 1372   |
| 0.054251126 | 0.007308659 | 0.101193592 | 17103 | 125    |
| 0.016186053 | 0.000130702 | 0.032241405 | 7651  | 1      |
| 0.621685394 | 0.695170261 | 0.548200527 | 49982 | 34746  |

|             |             |             |       |        |
|-------------|-------------|-------------|-------|--------|
| 0           | 0           | 0           | 4229  | 0      |
| 0.109121897 | 0.125441696 | 0.092802099 | 19810 | 2485   |
| 0.066538139 | 0.12088261  | 0.012193669 | 25198 | 3046   |
| 0.268474952 | 0.379490888 | 0.157459016 | 34570 | 13119  |
| 0.041338867 | 0.042903321 | 0.039774414 | 23821 | 1022   |
| 0.702939444 | 0.290198461 | 1.115680427 | 4938  | 1433   |
| 0.655772594 | 0.660998268 | 0.65054692  | 6351  | 4198   |
| NA          | NA          | NA          | 0     | 0      |
| 0.5472099   | 0.513677435 | 0.580742364 | 8079  | 4150   |
| 0.645375689 | 0.276368717 | 1.01438266  | 23617 | 6527   |
| 0.545034582 | 0.000464684 | 1.08960448  | 2152  | 1      |
| 0.161312023 | 0.013273543 | 0.309350504 | 5575  | 74     |
| 0.171634666 | 0           | 0.343269333 | 10809 | 0      |
| 0.466252547 | 0.612704524 | 0.31980057  | 5195  | 3183   |
| 0.123390861 | 7.6365E-05  | 0.246705356 | 13095 | 1      |
| 0.929056053 | 0.842508957 | 1.015603148 | 39634 | 33392  |
| 0.31242234  | 0.550174697 | 0.074669984 | 24614 | 13542  |
| 0.01894361  | 0.035966931 | 0.001920288 | 23466 | 844    |
| 0.784501754 | 0.743513957 | 0.825489551 | 9135  | 6792   |
| 0           | 0           | 0           | 1186  | 0      |
| 0.334422325 | 0.322283458 | 0.346561192 | 12157 | 3918   |
| 7.832968832 | 5.033134824 | 10.63280284 | 28882 | 145367 |
| 0.055910099 | 0.056709087 | 0.055111111 | 4479  | 254    |
| 0.665785489 | 0.545696539 | 0.785874439 | 2254  | 1230   |
| 0.429356479 | 0.627018076 | 0.231694881 | 14494 | 9088   |
| 0.022754725 | 0.006901311 | 0.03860814  | 10143 | 70     |
| 0.000400481 | 0.000800961 | 0           | 4994  | 4      |
| 0           | 0           | 0           | 4416  | 0      |
| 0.009336737 | 0           | 0.018673474 | 17900 | 0      |
| 0.013864068 | 0.000782983 | 0.026945153 | 7663  | 6      |
| 9.3066783   | 17.8021978  | 0.811158798 | 3731  | 66420  |
| 0.000933707 | 0.001867414 | 0           | 2142  | 4      |
| 0.231878127 | 0.293098599 | 0.170657654 | 17779 | 5211   |

|             |             |             |        |        |
|-------------|-------------|-------------|--------|--------|
| 0.069369424 | 0.006895419 | 0.131843428 | 12182  | 84     |
| 0           | 0           | 0           | 1713   | 0      |
| NA          | NA          | NA          | 190    | 0      |
| 0.082910366 | 0.073922933 | 0.091897799 | 29896  | 2210   |
| 0.338439879 | 0.280911589 | 0.39596817  | 6187   | 1738   |
| 0.089209903 | 0.17644742  | 0.001972387 | 2539   | 448    |
| 0.000883913 | 0           | 0.001767826 | 2462   | 0      |
| NA          | NA          | NA          | 0      | 0      |
| 1.309441349 | 0           | 2.618882698 | 27937  | 0      |
| 0.077016559 | 0.100727476 | 0.053305642 | 7148   | 720    |
| 0.307657393 | 0.515803397 | 0.099511389 | 14364  | 7409   |
| 0.211577111 | 0.019757689 | 0.403396534 | 5365   | 106    |
| 2.594960462 | 3.356335785 | 1.833585138 | 13187  | 44260  |
| 0.218403794 | 0.156206756 | 0.280600831 | 12285  | 1919   |
| 0.706197905 | 0.944937527 | 0.467458283 | 23210  | 21932  |
| 0.112249335 | 0.190899582 | 0.033599089 | 7648   | 1460   |
| 0.119788095 | 0.10965435  | 0.12992184  | 13424  | 1472   |
| 0           | 0           | 0           | 8678   | 0      |
| 2.570129526 | 3.94702491  | 1.193234141 | 27579  | 108855 |
| 0.262185545 | 0.243682034 | 0.280689056 | 6529   | 1591   |
| 0.242612885 | 0.28585051  | 0.19937526  | 40899  | 11691  |
| 1.347345343 | 1.429206206 | 1.265484481 | 278838 | 398517 |
| 0.629381934 | 0.736795839 | 0.521968029 | 13651  | 10058  |
| 0.415532045 | 0.51072454  | 0.320339551 | 5921   | 3024   |
| 0.162841158 | 0.15639547  | 0.169286845 | 28786  | 4502   |
| 0.063853471 | 0           | 0.127706942 | 8357   | 0      |
| 0.024043164 | 0.037148827 | 0.0109375   | 4307   | 160    |
| 0.133648563 | 0.20077669  | 0.066520435 | 43003  | 8634   |
| 0.001865461 | 0.003730921 | 0           | 8845   | 33     |
| 0.23785439  | 0.369592346 | 0.106116433 | 4808   | 1777   |
| 0.441444289 | 0.704354469 | 0.17853411  | 15708  | 11064  |
| 0.003350221 | 0.006700441 | 0           | 6119   | 41     |
| 1.267186229 | 0.331748957 | 2.2026235   | 10309  | 3420   |

|             |             |             |       |        |
|-------------|-------------|-------------|-------|--------|
| NA          | NA          | NA          | 0     | 0      |
| 0.034962353 | 0.003184375 | 0.066740331 | 9421  | 30     |
| 0.244272107 | 0.406371338 | 0.082172877 | 11332 | 4605   |
| 0.034038791 | 0.067849687 | 0.000227894 | 5748  | 390    |
| 0.616567512 | 0.530961372 | 0.702173652 | 21979 | 11670  |
| 0           | 0           | 0           | 2741  | 0      |
| 0.179395578 | 0.071746032 | 0.287045124 | 3150  | 226    |
| 0.106169791 | 0.145963878 | 0.066375705 | 5426  | 792    |
| 0.120428617 | 0.098365041 | 0.142492194 | 29909 | 2942   |
| 0           | 0           | 0           | 1162  | 0      |
| 1.736519405 | 1.729724166 | 1.743314643 | 19432 | 33612  |
| 0.555755616 | 0.901804888 | 0.209706344 | 39116 | 35275  |
| 0.22681503  | 0.273884154 | 0.179745907 | 58543 | 16034  |
| 0.027585567 | 0.052225083 | 0.00294605  | 5438  | 284    |
| 0.19703596  | 0.313846421 | 0.080225499 | 11512 | 3613   |
| 9.200089463 | 15.16698706 | 3.23319187  | 15606 | 236696 |
| 0.194075242 | 0.388150484 | 0           | 4439  | 1723   |
| 0.078428253 | 0           | 0.156856507 | 7985  | 0      |
| 0.249392869 | 0.421878803 | 0.076906935 | 16436 | 6934   |
| 12.91595763 | 23.42054693 | 2.41136833  | 6765  | 158440 |
| 0.656722465 | 0.484156227 | 0.829288703 | 1357  | 657    |
| 0.086063916 | 0.063287745 | 0.108840087 | 14916 | 944    |
| 0.146091516 | 0.292183031 | 0           | 2098  | 613    |
| 0.311596614 | 0.41754442  | 0.205648809 | 18798 | 7849   |
| 0.050833282 | 0.001168224 | 0.100498339 | 2568  | 3      |
| 0.153710614 | 7.29288E-05 | 0.307348299 | 13712 | 1      |
| 0.023975817 | 0.024090462 | 0.023861171 | 8136  | 196    |
| NA          | NA          | NA          | 0     | 0      |
| 0.395188053 | 0.790376106 | 0           | 1808  | 1429   |
| 0.463447784 | 0.373127484 | 0.553768085 | 6542  | 2441   |
| 0.673906334 | 0.58012685  | 0.767685818 | 21285 | 12348  |
| 0.05        | 0.1         | 0           | 6870  | 687    |
| 1.003143594 | 0.60732691  | 1.398960277 | 8926  | 5421   |

|             |             |             |       |        |
|-------------|-------------|-------------|-------|--------|
| 0.232796973 | 0.260955434 | 0.204638512 | 34937 | 9117   |
| 0.180458299 | 0.321948649 | 0.038967948 | 20876 | 6721   |
| 0.108629839 | 0.07593243  | 0.141327247 | 5979  | 454    |
| 0           | 0           | 0           | 1838  | 0      |
| 0.346191954 | 0.376371183 | 0.316012725 | 13492 | 5078   |
| 0.06905     | 0.066867307 | 0.071232693 | 25917 | 1733   |
| 0.716122809 | 0.945390961 | 0.486854657 | 22304 | 21086  |
| 0.061659427 | 0.057717972 | 0.065600882 | 8992  | 519    |
| 0.043527072 | 0.053540314 | 0.03351383  | 12626 | 676    |
| 0.20955986  | 0.268333519 | 0.1507862   | 17918 | 4808   |
| 0.237782658 | 0.104923474 | 0.370641842 | 59653 | 6259   |
| 0.385634864 | 0.501316194 | 0.269953535 | 45586 | 22853  |
| 0.412970986 | 0.000769823 | 0.82517215  | 1299  | 1      |
| NA          | NA          | NA          | 0     | 0      |
| 0.069970575 | 0.086036762 | 0.053904388 | 31010 | 2668   |
| 1.268695155 | 1.091805094 | 1.445585216 | 9030  | 9859   |
| 0.098153695 | 0.146551233 | 0.049756158 | 35114 | 5146   |
| 0.038783499 | 0.047608174 | 0.029958824 | 8759  | 417    |
| 0           | 0           | 0           | 7426  | 0      |
| 1.729519941 | 2.66571554  | 0.793324343 | 4556  | 12145  |
| 0.054981253 | 0.011631924 | 0.098330582 | 8683  | 101    |
| 0.405465225 | 0.538874518 | 0.272055932 | 20489 | 11041  |
| 0.441636316 | 0.589916076 | 0.293356556 | 76855 | 45338  |
| 3.701953893 | 1.507171929 | 5.896735857 | 25307 | 38142  |
| 0.200363394 | 0.039606523 | 0.361120264 | 3863  | 153    |
| 0.026442538 | 0.001332149 | 0.051552926 | 4504  | 6      |
| 0.441872864 | 0.485687809 | 0.398057919 | 38848 | 18868  |
| 0.00514048  | 0.009192066 | 0.001088893 | 6201  | 57     |
| 0.230878224 | 0.327220173 | 0.134536275 | 10033 | 3283   |
| 0.110401249 | 0.03625     | 0.184552498 | 29600 | 1073   |
| 1.017141522 | 0.572352773 | 1.461930271 | 10511 | 6016   |
| 0.864776346 | 0.582272727 | 1.147279965 | 11000 | 6405   |
| 3.479477858 | 2.83947293  | 4.119482786 | 52365 | 148689 |

|             |             |             |        |        |
|-------------|-------------|-------------|--------|--------|
| 4.925644667 | 4.280960907 | 5.570328426 | 6702   | 28691  |
| 0.248654315 | 0.35031185  | 0.14699678  | 18278  | 6403   |
| 1.363948366 | 0.535007243 | 2.192889488 | 10355  | 5540   |
| 0.263122123 | 0.241511541 | 0.284732705 | 26860  | 6487   |
| 0.106583794 | 0           | 0.213167587 | 3533   | 0      |
| 0.311471985 | 0.488261591 | 0.134682379 | 35567  | 17366  |
| 0.18904701  | 0.27594244  | 0.10215158  | 9868   | 2723   |
| NA          | NA          | NA          | 0      | 0      |
| NA          | NA          | NA          | 0      | 0      |
| 0.192060819 | 0.068007096 | 0.316114542 | 5073   | 345    |
| 0.071297514 | 0.00530504  | 0.137289989 | 9425   | 50     |
| 0.140338666 | 0.006669282 | 0.274008051 | 2549   | 17     |
| 0.69700856  | 0.5224761   | 0.871541021 | 14749  | 7706   |
| 0.918964146 | 1.082710075 | 0.755218216 | 2273   | 2461   |
| 1.124564108 | 1.80619245  | 0.442935765 | 27259  | 49235  |
| 0.012383228 | 0.024766457 | 0           | 9206   | 228    |
| 0.587157188 | 0.988469407 | 0.185844969 | 10754  | 10630  |
| 0.080944165 | 0.06776283  | 0.094125501 | 2007   | 136    |
| 0.383022948 | 0.353332365 | 0.412713531 | 34435  | 12167  |
| 0.157375244 | 0.267980636 | 0.046769852 | 2892   | 775    |
| 2.421585425 | 4.080815103 | 0.762355747 | 83425  | 340442 |
| 0           | 0           | 0           | 2395   | 0      |
| 0.258961381 | 0.414341695 | 0.103581067 | 29857  | 12371  |
| 0.617600335 | 0.548194175 | 0.687006494 | 25750  | 14116  |
| 0.225125817 | 0.192359317 | 0.257892316 | 119204 | 22930  |
| 0.134739676 | 0.083890257 | 0.185589094 | 5686   | 477    |
| 0.28018788  | 0.280165234 | 0.280210526 | 30018  | 8410   |
| 0           | 0           | 0           | 15143  | 0      |
| 0.02953012  | 0.007313698 | 0.051746541 | 10118  | 74     |
| 0.084311633 | 0           | 0.168623266 | 5348   | 0      |
| 0.495965201 | 0.000211595 | 0.991718808 | 4726   | 1      |
| 0.872781647 | 0.739329604 | 1.006233691 | 22703  | 16785  |
| 0.000261472 | 0           | 0.000522944 | 4995   | 0      |

|             |             |             |        |        |
|-------------|-------------|-------------|--------|--------|
| 0.565075338 | 0.33739665  | 0.792754026 | 9434   | 3183   |
| 1.329007355 | 0.941659685 | 1.716355024 | 42972  | 40465  |
| 0.554591185 | 0.173112518 | 0.936069851 | 10265  | 1777   |
| 0.300678085 | 0.162322666 | 0.439033504 | 9093   | 1476   |
| 0.000842912 | 0.001685824 | 0           | 6525   | 11     |
| 0.103679501 | 0.106351828 | 0.101007173 | 26638  | 2833   |
| 0.726982674 | 0.553239773 | 0.900725575 | 16745  | 9264   |
| 0.230741091 | 0.167158309 | 0.294323873 | 19323  | 3230   |
| 0.207264965 | 0.120808561 | 0.293721369 | 4205   | 508    |
| 0.113322058 | 0.075793595 | 0.15085052  | 14302  | 1084   |
| 0.08913639  | 0.002784366 | 0.175488414 | 9697   | 27     |
| 0.043079662 | 0.069152399 | 0.017006925 | 66057  | 4568   |
| 0.000831282 | 0.001034029 | 0.000628536 | 10638  | 11     |
| 0.933461944 | 1.175144551 | 0.691779336 | 13663  | 16056  |
| 1.786480339 | 2.379093311 | 1.193867366 | 112806 | 268376 |
| 1.348195558 | 1.050841453 | 1.645549663 | 5645   | 5932   |
| 0.895988133 | 0.355499082 | 1.436477183 | 28332  | 10072  |
| 0.187741857 | 0.120085677 | 0.255398037 | 14473  | 1738   |
| 1.318076072 | 0.96347543  | 1.672676713 | 9829   | 9470   |
| 0.412965767 | 0.468026197 | 0.357905337 | 18781  | 8790   |
| 0.480747339 | 0.556819876 | 0.404674802 | 40250  | 22412  |
| 0.129064364 | 0.000328623 | 0.257800106 | 3043   | 1      |
| 1.353922306 | 0.000965251 | 2.706879362 | 1036   | 1      |
| 0.490140075 | 0.956008305 | 0.024271845 | 7706   | 7367   |
| 0.164979808 | 0.256726348 | 0.073233268 | 102210 | 26240  |
| 0.059442746 | 0.07510305  | 0.043782442 | 12130  | 911    |
| 0.741528975 | 0.765657556 | 0.717400394 | 8159   | 6247   |
| 0.200102959 | 0.163622609 | 0.23658331  | 9253   | 1514   |
| 0.676849819 | 0.820704579 | 0.532995059 | 31423  | 25789  |
| 0.15829753  | 0.038494735 | 0.278100325 | 5793   | 223    |
| 0.553203122 | 0.185103308 | 0.921302937 | 23522  | 4354   |
| 2.587739528 | 3.744000541 | 1.431478516 | 14793  | 55385  |
| 0.148414474 | 0.037384899 | 0.259444048 | 5430   | 203    |



|             |             |             |        |       |
|-------------|-------------|-------------|--------|-------|
| 0.401904979 | 0.407221471 | 0.396588486 | 5179   | 2109  |
| 0.186949478 | 0.022460197 | 0.351438759 | 10552  | 237   |
| 0.008618272 | 0.016029948 | 0.001206596 | 10418  | 167   |
| 0.12362466  | 0.184941628 | 0.062307692 | 13534  | 2503  |
| 0.147628799 | 0.026531729 | 0.268725869 | 3656   | 97    |
| 0.132745115 | 0.260845889 | 0.004644341 | 11018  | 2874  |
| 0.240665022 | 0.253816286 | 0.227513757 | 37602  | 9544  |
| 0.618565777 | 0.940924658 | 0.296206897 | 3504   | 3297  |
| 0.120971403 | 0           | 0.241942805 | 1161   | 0     |
| 0.538437996 | 0.10757034  | 0.969305652 | 12866  | 1384  |
| 0.142403868 | 0.257946389 | 0.026861346 | 6827   | 1761  |
| 0.040373807 | 0.071984908 | 0.008762706 | 37105  | 2671  |
| 0.079970208 | 0.073811384 | 0.086129032 | 16637  | 1228  |
| 0.069588311 | 0.063063063 | 0.076113558 | 6549   | 413   |
| 0.369201025 | 0.457417016 | 0.280985033 | 138189 | 63210 |
| 0.111142996 | 0.145979608 | 0.076306385 | 16379  | 2391  |
| 0.117228687 | 0.230010953 | 0.004446421 | 2739   | 630   |
| 2.307918926 | 2.68596882  | 1.929869033 | 1796   | 4824  |
| NA          | NA          | NA          | 54     | 7231  |
| 3.821357363 | 3.433995327 | 4.208719399 | 15408  | 52911 |
| 0.199214313 | 0.000694806 | 0.39773382  | 5757   | 4     |
| 0.290562147 | 0.414519609 | 0.166604686 | 7879   | 3266  |
| 0.389300951 | 0.33340748  | 0.445194422 | 125876 | 41968 |
| 0.01201515  | 0.024030299 | 0           | 7657   | 184   |
| 0.068187318 | 0.136374637 | 0           | 8264   | 1127  |
| 0.235139043 | 0.216814556 | 0.253463531 | 44628  | 9676  |
| NA          | NA          | NA          | 518    | 0     |
| 0.385744528 | 0.194355059 | 0.577133998 | 36670  | 7127  |
| 0.321175793 | 0.350280264 | 0.292071322 | 20338  | 7124  |
| 0.541107405 | 0.527171897 | 0.555042912 | 53916  | 28423 |
| 0.174749605 | 0.349499209 | 0           | 3794   | 1326  |
| 4.38507001  | 5.72404439  | 3.046095631 | 4055   | 23211 |
| 0.248179872 | 0           | 0.496359743 | 3549   | 0     |

|             |             |             |        |       |
|-------------|-------------|-------------|--------|-------|
| 0.215962555 | 0.146174702 | 0.285750408 | 33932  | 4960  |
| 4.761125427 | 3.672516129 | 5.849734725 | 11625  | 42693 |
| 0           | 0           | 0           | 1209   | 0     |
| 0.074897582 | 0.110762101 | 0.039033064 | 19420  | 2151  |
| 0           | 0           | 0           | 5608   | 0     |
| 0.116716316 | 0.079717133 | 0.153715499 | 15555  | 1240  |
| 0.568467589 | 0.647703684 | 0.489231493 | 15416  | 9985  |
| 0.82744825  | 1.141203528 | 0.513692971 | 39567  | 45154 |
| 0.363859691 | 0.15822698  | 0.569492403 | 21861  | 3459  |
| 0.09125886  | 0.026162019 | 0.156355701 | 7530   | 197   |
| 0.011900813 | 0.022360704 | 0.001440922 | 2728   | 61    |
| 0.194643294 | 0.000376081 | 0.388910506 | 18613  | 7     |
| 0.200901765 | 0.042339934 | 0.359463595 | 16462  | 697   |
| 0.078750031 | 0.010875476 | 0.146624585 | 16551  | 180   |
| 0.145222056 | 0.013529275 | 0.276914837 | 4287   | 58    |
| 0.033554608 | 0           | 0.067109216 | 18282  | 0     |
| 0.276620876 | 0.447187977 | 0.106053776 | 57023  | 25500 |
| 0.103798129 | 0.202524797 | 0.005071462 | 5545   | 1123  |
| 0.028187951 | 0.001406376 | 0.054969526 | 14932  | 21    |
| 0.414679837 | 0.282276488 | 0.547083186 | 168962 | 47694 |
| 0.039006515 | 0.011331445 | 0.066681584 | 2471   | 28    |
| 0.132003104 | 0.132045515 | 0.131960693 | 7558   | 998   |
| 0.036617996 | 0.036774807 | 0.036461185 | 9463   | 348   |
| 0.87003635  | 1.544545602 | 0.195527097 | 12302  | 19001 |
| 0.141265139 | 0.281803323 | 0.000726956 | 14684  | 4138  |
| 0.717498316 | 0.023598072 | 1.411398561 | 7882   | 186   |
| 0.150955677 | 0.221333433 | 0.080577921 | 26878  | 5949  |
| 0.653742815 | 0.838148831 | 0.469336798 | 63441  | 53173 |
| 0.419652469 | 0.667150846 | 0.172154092 | 13769  | 9186  |
| 0.048096175 | 0.003971464 | 0.092220886 | 13597  | 54    |
| 0.319940409 | 0.13257804  | 0.507302777 | 24891  | 3300  |
| 0.033157893 | 0.001919102 | 0.064396684 | 6774   | 13    |
| 0.793188133 | 1.077433351 | 0.508942915 | 55777  | 60096 |

|             |             |             |       |        |
|-------------|-------------|-------------|-------|--------|
| 0.158179087 | 0.277250113 | 0.039108062 | 2211  | 613    |
| 0.784008604 | 0.547153313 | 1.020863896 | 30878 | 16895  |
| 0.36095926  | 0.389780357 | 0.332138162 | 17574 | 6850   |
| 0.037865771 | 0.010600201 | 0.065131342 | 6981  | 74     |
| 0.122260163 | 0.184664749 | 0.059855578 | 36152 | 6676   |
| 0           | 0           | 0           | 2413  | 0      |
| 0.029537974 | 0.059075949 | 0           | 24003 | 1418   |
| 0           | 0           | 0           | 1903  | 0      |
| 0.081531892 | 0           | 0.163063784 | 3891  | 0      |
| 1.673269703 | 2.111991617 | 1.234547788 | 15269 | 32248  |
| 0.530893217 | 0.727875059 | 0.333911375 | 31695 | 23070  |
| 0.232238461 | 0.281751288 | 0.182725634 | 13590 | 3829   |
| 0.286619482 | 0.004971898 | 0.568267067 | 4626  | 23     |
| 0.061709694 | 0.006313275 | 0.117106114 | 17582 | 111    |
| 0.090639202 | 0.001580492 | 0.179697912 | 8858  | 14     |
| 5.939776926 | 4.372746171 | 7.506807681 | 47142 | 206140 |
| 0.561261701 | 0.568160783 | 0.554362619 | 7563  | 4297   |
| 0.019081112 | 0.035102041 | 0.003060184 | 1225  | 43     |
| 0.209668367 | 0.252318376 | 0.167018358 | 22753 | 5741   |
| 0.205418371 | 0.28092254  | 0.129914202 | 19468 | 5469   |
| 0.091881752 | 0.041176728 | 0.142586776 | 22877 | 942    |
| NA          | NA          | NA          | 305   | 0      |
| 0.101967298 | 0.1481428   | 0.055791796 | 27703 | 4104   |
| 2.378116941 | 2.670245399 | 2.085988484 | 5216  | 13928  |
| 0.42815757  | 0.457258743 | 0.399056397 | 13067 | 5975   |
| 4.914842828 | 4.14081359  | 5.688872067 | 2237  | 9263   |
| 15.43389955 | 22.53070605 | 8.337093044 | 33723 | 759803 |
| 7.90198211  | 4.957801222 | 10.846163   | 46826 | 232154 |
| 2.088422368 | 3.689806678 | 0.487038058 | 1138  | 4199   |
| 0.681144071 | 0.610359065 | 0.751929076 | 19133 | 11678  |
| 0           | 0           | 0           | 3633  | 0      |
| 1.804491278 | 2.920727522 | 0.688255034 | 5828  | 17022  |
| 5.053664383 | 7.673024929 | 2.434303837 | 40315 | 309338 |

|             |             |             |       |        |
|-------------|-------------|-------------|-------|--------|
| 0.139995763 | 0.248305961 | 0.031685564 | 17414 | 4324   |
| 0.031392948 | 0.042246873 | 0.020539024 | 25422 | 1074   |
| 0.11593131  | 0.140696498 | 0.091166122 | 20761 | 2921   |
| 0.008070115 | 0.005876667 | 0.010263563 | 25865 | 152    |
| 0.355326987 | 0.511142363 | 0.199511612 | 18488 | 9450   |
| 0           | 0           | 0           | 1640  | 0      |
| 0.371959696 | 0.15191828  | 0.592001111 | 8419  | 1279   |
| 0.101226426 | 0.097185681 | 0.10526717  | 12543 | 1219   |
| 0.884542293 | 0.609151329 | 1.159933256 | 23472 | 14298  |
| NA          | NA          | NA          | 94    | 0      |
| 0.027716689 | 0.003469469 | 0.05196391  | 10088 | 35     |
| 0.015603346 | 0.021342134 | 0.009864558 | 9090  | 194    |
| 0.263205121 | 0.432928311 | 0.093481932 | 16460 | 7126   |
| NA          | NA          | NA          | 126   | 0      |
| 0           | 0           | 0           | 2387  | 0      |
| 0.065665497 | 0.003378664 | 0.127952329 | 11839 | 40     |
| 0.610472449 | 0.857285113 | 0.363659784 | 22093 | 18940  |
| 0.067934747 | 0.118514248 | 0.017355245 | 12142 | 1439   |
| 0           | 0           | 0           | 5812  | 0      |
| 0.379083512 | 0.089139878 | 0.669027146 | 11510 | 1026   |
| 0           | 0           | 0           | 5525  | 0      |
| 0.125921699 | 0.044815645 | 0.207027753 | 4909  | 220    |
| 0.973337724 | 1.441661409 | 0.505014039 | 84001 | 121101 |
| 2.531753597 | 2.010045335 | 3.053461859 | 41910 | 84241  |
| 0.93839873  | 1.308311364 | 0.568486097 | 7207  | 9429   |
| 0.192553734 | 0.281569343 | 0.103538124 | 21920 | 6172   |
| 0           | 0           | 0           | 690   | 0      |
| 0           | 0           | 0           | 3786  | 0      |
| 0.006118881 | 0.012237762 | 0           | 1716  | 21     |
| 0.999844656 | 0.815379706 | 1.184309605 | 15670 | 12777  |
| 0.756310595 | 0.374601925 | 1.138019266 | 27947 | 10469  |
| 0.170742331 | 0.244378552 | 0.097106109 | 12141 | 2967   |
| 1.060119091 | 1.491440019 | 0.628798162 | 16472 | 24567  |

|             |             |             |       |        |
|-------------|-------------|-------------|-------|--------|
| 0.17356428  | 0.192047589 | 0.15508097  | 15970 | 3067   |
| 2.400441106 | 2.029316862 | 2.771565351 | 21694 | 44024  |
| 0.319133892 | 0.437873007 | 0.200394778 | 20442 | 8951   |
| 2.672057204 | 0.893748358 | 4.45036605  | 15228 | 13610  |
| 0.391905722 | 0.627474398 | 0.156337047 | 33493 | 21016  |
| 0.112275278 | 0.113553114 | 0.110997442 | 19656 | 2232   |
| 2.125995207 | 0.800219962 | 3.451770452 | 18185 | 14552  |
| 0.088819529 | 0.018720495 | 0.158918562 | 12286 | 230    |
| 6.47585E-05 | 0.000129517 | 0           | 7721  | 1      |
| 0.088807945 | 0.029942389 | 0.147673502 | 13192 | 395    |
| 0.099698624 | 0.171510367 | 0.027886881 | 11527 | 1977   |
| 2.253593603 | 3.057823725 | 1.449363481 | 11414 | 34902  |
| 30.3934439  | 42.83344355 | 17.95344425 | 10585 | 453392 |
| 0.056225371 | 0.040622407 | 0.071828335 | 48200 | 1958   |
| 0.055599264 | 0.110335466 | 0.000863061 | 5157  | 569    |
| 0.006560346 | 0.00966944  | 0.003451251 | 4447  | 43     |
| 0.541947489 | 0.372010693 | 0.711884285 | 13841 | 5149   |
| 0.686557747 | 0.328572238 | 1.044543256 | 17643 | 5797   |
| 0.059493377 | 0           | 0.118986753 | 6003  | 0      |
| 0.036495879 | 0.000121183 | 0.072870575 | 8252  | 1      |
| 0.119249564 | 0.004346476 | 0.234152652 | 3221  | 14     |
| 0.040594882 | 0.000521558 | 0.080668205 | 11504 | 6      |
| 0.29750152  | 0.120015301 | 0.474987739 | 10457 | 1255   |
| 0.120666479 | 0.118932039 | 0.122400919 | 19364 | 2303   |
| 0.745556882 | 1.138253809 | 0.352859956 | 42733 | 48641  |
| 1.157353909 | 1.693199276 | 0.621508541 | 58582 | 99191  |
| NA          | NA          | NA          | 0     | 0      |
| 0.586999136 | 0.521905831 | 0.652092442 | 21387 | 11162  |
| 0.006176289 | 0.000922834 | 0.011429745 | 22756 | 21     |
| 0.35901654  | 0.04608508  | 0.671947999 | 6488  | 299    |
| 0.140719956 | 0.258960573 | 0.022479339 | 15624 | 4046   |
| 0.902821311 | 0.530879713 | 1.274762908 | 11140 | 5914   |
| 0.458948236 | 0.358981494 | 0.558914978 | 7187  | 2580   |

|             |             |             |       |        |
|-------------|-------------|-------------|-------|--------|
| 0.242089806 | 0.484052223 | 0.000127389 | 6051  | 2929   |
| 0.062117231 | 0.059119919 | 0.065114542 | 5954  | 352    |
| 0.210888138 | 0.367549038 | 0.054227238 | 10502 | 3860   |
| 0.104470818 | 0.188126755 | 0.02081488  | 4986  | 938    |
| 0.892550544 | 0.316455696 | 1.468645392 | 4108  | 1300   |
| 0.015223099 | 0.029524865 | 0.000921332 | 15343 | 453    |
| 0.362609031 | 0.342329793 | 0.382888269 | 22972 | 7864   |
| 0.006105603 | 0.012211205 | 0           | 20473 | 250    |
| 0.247891643 | 0.495783286 | 0           | 3913  | 1940   |
| 0.053243848 | 0.106487696 | 0           | 8940  | 952    |
| 1.662743561 | 1.577856302 | 1.74763082  | 12735 | 20094  |
| 0.168234787 | 0.308182513 | 0.028287061 | 3923  | 1209   |
| 0.030777532 | 0.017032993 | 0.04452207  | 21429 | 365    |
| 0.16139052  | 0.235338822 | 0.087442219 | 7895  | 1858   |
| 0.39397106  | 0.498357756 | 0.289584364 | 7916  | 3945   |
| 0.048479251 | 0.024589675 | 0.072368828 | 16755 | 412    |
| 9.678858441 | 7.766500178 | 11.5912167  | 5606  | 43539  |
| 0.152719984 | 0.030076142 | 0.275363825 | 7880  | 237    |
| 0.187420804 | 0.303786616 | 0.071054993 | 41990 | 12756  |
| 3.865093664 | 3.578045861 | 4.152141468 | 21718 | 77708  |
| 0.722329293 | 0.613098514 | 0.831560072 | 16353 | 10026  |
| 5.124811105 | 9.197264873 | 1.052357337 | 36342 | 334247 |
| 0.35115     | 0.32717803  | 0.375121969 | 23232 | 7601   |
| 0.084288102 | 0.160556564 | 0.00801964  | 8265  | 1327   |
| 0.09993849  | 0.068596738 | 0.131280242 | 18514 | 1270   |
| 0.444925531 | 0.384459989 | 0.505391072 | 33166 | 12751  |
| 0.090092787 | 5.66958E-05 | 0.180128878 | 17638 | 1      |
| 1.638746981 | 2.371052632 | 0.90644133  | 18240 | 43248  |
| 0.066119686 | 0.000258465 | 0.131980907 | 3869  | 1      |
| 27.42358533 | 24.71543731 | 30.13173335 | 23942 | 591737 |
| 0.678912333 | 0.407078398 | 0.950746269 | 7092  | 2887   |
| 0.610136449 | 0.807828401 | 0.412444497 | 36457 | 29451  |
| 0.013756331 | 0.021430795 | 0.006081866 | 57814 | 1239   |

|             |             |             |       |       |
|-------------|-------------|-------------|-------|-------|
| 0           | 0           | 0           | 22524 | 0     |
| 0.571926578 | 1.105404769 | 0.038448387 | 29733 | 32867 |
| 0.33142531  | 0.459700889 | 0.203149731 | 24740 | 11373 |
| 0.118527608 | 0.184246062 | 0.052809154 | 6665  | 1228  |
| 0.178047503 | 0.204710012 | 0.151384993 | 13673 | 2799  |
| 0.281793921 | 0.46524031  | 0.098347533 | 16125 | 7502  |
| 0.352946923 | 0.001776199 | 0.704117647 | 3941  | 7     |
| 1.021354121 | 0.675807289 | 1.366900952 | 46204 | 31225 |
| 1.690348646 | 0.566009654 | 2.814687638 | 49720 | 28142 |
| 0.539886389 | 0.513086274 | 0.566686504 | 44092 | 22623 |
| 0.090594691 | 0.06110417  | 0.120085213 | 25612 | 1565  |
| 0.020983494 | 0.041486603 | 0.000480384 | 11570 | 480   |
| 0           | 0           | 0           | 4441  | 0     |
| 3.52833E-05 | 7.05667E-05 | 0           | 14171 | 1     |
| 0.538610763 | 0.908737392 | 0.168484134 | 8229  | 7478  |
| NA          | NA          | NA          | 221   | 0     |
| 0.408904844 | 0.436043305 | 0.381766382 | 34453 | 15023 |
| 0.229797051 | 0.203566341 | 0.256027762 | 20357 | 4144  |
| 0.050370956 | 0.017908875 | 0.082833036 | 7594  | 136   |
| 0.127106083 | 0.093023256 | 0.161188911 | 13674 | 1272  |
| 0.064288331 | 0.02643779  | 0.102138872 | 7981  | 211   |
| 0.090658195 | 0.169964956 | 0.011351434 | 9702  | 1649  |
| 0.964704579 | 0.430668605 | 1.498740554 | 6880  | 2963  |
| 0.06919639  | 0.042373324 | 0.096019455 | 38326 | 1624  |
| 0.161461455 | 0.167124645 | 0.155798265 | 22199 | 3710  |
| 0.121409823 | 0.178588808 | 0.064230838 | 14385 | 2569  |
| 0.275005354 | 0.550010709 | 0           | 9338  | 5136  |
| 0.049836641 | 0.003384095 | 0.096289187 | 7683  | 26    |
| 0.106674086 | 0.187523208 | 0.025824964 | 2693  | 505   |
| 0.248260853 | 0.357676324 | 0.138845382 | 34411 | 12308 |
| 0.162689304 | 0.102281495 | 0.223097113 | 9073  | 928   |
| 0.121026312 | 9.02527E-05 | 0.241962372 | 11080 | 1     |
| 0.11654652  | 0.146549398 | 0.086543642 | 18533 | 2716  |

|             |             |             |       |        |
|-------------|-------------|-------------|-------|--------|
| 0.036882594 | 0.001164353 | 0.072600834 | 11165 | 13     |
| 0.862186131 | 0.987938749 | 0.736433513 | 35983 | 35549  |
| 0.060698903 | 0.02212727  | 0.099270536 | 6553  | 145    |
| 5.270386453 | 3.099350703 | 7.441422202 | 24026 | 74465  |
| 0.521784232 | 0           | 1.043568465 | 1483  | 0      |
| 0.075151234 | 0.112102387 | 0.038200081 | 21409 | 2400   |
| 0.269317079 | 0.20276676  | 0.335867398 | 20674 | 4192   |
| 0.405412499 | 0.39411959  | 0.416705408 | 6054  | 2386   |
| 0.005945122 | 0           | 0.011890244 | 2872  | 0      |
| 0.293485392 | 0.527073733 | 0.059897052 | 1736  | 915    |
| 0.111037316 | 0.097569355 | 0.124505277 | 23286 | 2272   |
| 0.492448295 | 0.042176871 | 0.94271972  | 4410  | 186    |
| 0.98252896  | 1.932489451 | 0.032568468 | 948   | 1832   |
| 0.004062756 | 0.003733333 | 0.004392179 | 7500  | 28     |
| 0.524906994 | 0.429446747 | 0.620367241 | 11098 | 4766   |
| 0.174355348 | 0.183572542 | 0.165138154 | 18603 | 3415   |
| 0.038957255 | 0.003943577 | 0.073970934 | 6593  | 26     |
| 0.533914395 | 0.660762545 | 0.407066246 | 27382 | 18093  |
| 0.096716361 | 0.180946552 | 0.01248617  | 9804  | 1774   |
| NA          | NA          | NA          | 510   | 0      |
| 0.430720448 | 0.248793956 | 0.61264694  | 32959 | 8200   |
| 2.329170058 | 2.550566982 | 2.107773134 | 41183 | 105040 |
| 0.153596644 | 0.259297344 | 0.047895945 | 5835  | 1513   |
| 0.559676498 | 0.502441293 | 0.616911704 | 17204 | 8644   |
| NA          | NA          | NA          | 0     | 0      |
| 0.090352843 | 0.160106435 | 0.020599251 | 30817 | 4934   |
| 0.2845147   | 0.353298153 | 0.215731247 | 7580  | 2678   |
| 0.115287664 | 0.047414054 | 0.183161274 | 32986 | 1564   |
| 0.085408022 | 0.000193199 | 0.170622844 | 5176  | 1      |
| 0.001128668 | 0           | 0.002257336 | 3980  | 0      |
| 0.069371374 | 0.05967095  | 0.079071797 | 12217 | 729    |
| NA          | NA          | NA          | 189   | 0      |
| 0.149313429 | 0.128342246 | 0.170284612 | 17017 | 2184   |



|             |             |             |       |        |
|-------------|-------------|-------------|-------|--------|
| 0.413409055 | 0.622305737 | 0.204512373 | 9047  | 5630   |
| 1.643969827 | 2.094062103 | 1.193877551 | 5507  | 11532  |
| 0.648213784 | 0.715798492 | 0.580629076 | 29180 | 20887  |
| 0.009633756 | 0.011159403 | 0.008108108 | 8513  | 95     |
| 0.123211194 | 0.098809823 | 0.147612565 | 27811 | 2748   |
| 0.328175562 | 0.377128018 | 0.279223106 | 10397 | 3921   |
| 0.201249487 | 0.337440758 | 0.065058216 | 8440  | 2848   |
| 0.000542104 | 0.00048216  | 0.000602047 | 2074  | 1      |
| 3.233747051 | 5.976620158 | 0.490873944 | 18563 | 110944 |
| 0.640755782 | 1.166720727 | 0.114790837 | 9249  | 10791  |
| 0.361793005 | 0.256726293 | 0.466859717 | 34157 | 8769   |
| 0.401141561 | 0.283516221 | 0.518766901 | 8384  | 2377   |
| 0.222497616 | 0.078468537 | 0.366526695 | 2638  | 207    |
| 0.302877526 | 0.400302009 | 0.205453043 | 28476 | 11399  |
| 0.14165733  | 0.1690104   | 0.114304261 | 15289 | 2584   |
| 0.019533353 | 0.019407151 | 0.019659554 | 7523  | 146    |
| NA          | NA          | NA          | 1662  | 0      |
| 3.189719542 | 4.278249106 | 2.101189977 | 51745 | 221378 |
| 0.013169577 | 0           | 0.026339154 | 3718  | 0      |
| 0.034088344 | 0.058964593 | 0.009212095 | 14178 | 836    |
| 0.004331754 | 0.000484027 | 0.008179481 | 2066  | 1      |
| 0.340786503 | 0.362280234 | 0.319292772 | 1877  | 680    |
| NA          | NA          | NA          | 0     | 0      |
| 0.020265668 | 0           | 0.040531335 | 2701  | 0      |
| 0.135065674 | 0.072316173 | 0.197815176 | 21406 | 1548   |
| 0.179448269 | 0.099882029 | 0.259014509 | 5086  | 508    |
| 0.327507015 | 0.001459854 | 0.653554175 | 685   | 1      |
| 0.664294206 | 1.071999112 | 0.2565893   | 9014  | 9663   |
| 1.255652224 | 0.641311475 | 1.869992973 | 1525  | 978    |
| 0.110664823 | 0.120254845 | 0.101074802 | 15068 | 1812   |
| 0.272777523 | 0.382384883 | 0.163170163 | 46040 | 17605  |
| 1.328852347 | 1.764027294 | 0.8936774   | 20371 | 35935  |
| 0.484140888 | 0.638219895 | 0.330061882 | 26740 | 17066  |

|             |             |             |       |        |
|-------------|-------------|-------------|-------|--------|
| 0.031631618 | 0.037750897 | 0.025512338 | 7523  | 284    |
| 0.973162231 | 1.211030345 | 0.735294118 | 8667  | 10496  |
| 9.18442E-05 | 0.000183688 | 0           | 5444  | 1      |
| 0.815640774 | 0.654386731 | 0.976894818 | 11455 | 7496   |
| 0.157500935 | 0.315001871 | 0           | 2673  | 842    |
| 4.89333E-05 | 0           | 9.78665E-05 | 7852  | 0      |
| 3.559311442 | 4.211350585 | 2.907272299 | 26818 | 112940 |
| 0.274535697 | 0.423260006 | 0.125811388 | 43276 | 18317  |
| 0.113816928 | 0.148898678 | 0.078735178 | 2270  | 338    |
| 0.778904793 | 0.453405018 | 1.104404568 | 1674  | 759    |
| 0.201764199 | 0.173979378 | 0.22954902  | 40637 | 7070   |
| 0.126875652 | 0.076575692 | 0.177175612 | 5093  | 390    |
| 2.188455879 | 0.469499821 | 3.907411937 | 8377  | 3933   |
| 0.033732942 | 0.000853242 | 0.066612642 | 16408 | 14     |
| 0.134310673 | 0.232186732 | 0.036434613 | 4884  | 1134   |
| 0.154846836 | 0.167501928 | 0.142191745 | 10376 | 1738   |
| 0.50072786  | 0.541981695 | 0.459474025 | 7539  | 4086   |
| 0.009433344 | 0.004819277 | 0.01404741  | 1245  | 6      |
| 0.543933929 | 0.518786922 | 0.569080936 | 41811 | 21691  |
| 0.080612502 | 0.04869904  | 0.112525964 | 21561 | 1050   |
| 0.06501016  | 0.126209284 | 0.003811036 | 11267 | 1422   |
| 0.23497578  | 0.386599091 | 0.083352468 | 13417 | 5187   |
| 0.244600451 | 0.198269736 | 0.290931167 | 32365 | 6417   |
| 0.59669119  | 0.802821189 | 0.390561191 | 29562 | 23733  |
| 0.045662786 | 0.087305569 | 0.004020002 | 9965  | 870    |
| 0.108178455 | 0.06973876  | 0.146618151 | 35676 | 2488   |
| 0.008304892 | 0           | 0.016609784 | 4282  | 0      |
| 0           | 0           | 0           | 2929  | 0      |
| 0.059717843 | 0.087169563 | 0.032266123 | 24286 | 2117   |
| 0.006237689 | 0.012475378 | 0           | 10661 | 133    |
| 0.06194056  | 0.10699453  | 0.016886591 | 54657 | 5848   |
| 0.193789327 | 0.126048165 | 0.261530489 | 14907 | 1879   |
| 0.005813953 | 0           | 0.011627907 | 2162  | 0      |

|             |             |             |        |        |
|-------------|-------------|-------------|--------|--------|
| 0.928220759 | 1.004589667 | 0.851851852 | 23749  | 23858  |
| 0.073360623 | 0.135745027 | 0.010976218 | 8597   | 1167   |
| 1.015990856 | 1.156510409 | 0.875471303 | 33001  | 38166  |
| 0.000789875 | 0.00145743  | 0.00012232  | 29504  | 43     |
| 0.121958567 | 0.170557717 | 0.073359417 | 6168   | 1052   |
| 1.399302063 | 1.445902998 | 1.352701127 | 7237   | 10464  |
| 1.666788004 | 1.533762916 | 1.799813091 | 367178 | 563164 |
| 0.286061741 | 0.026611473 | 0.54551201  | 1691   | 45     |
| 0.165118469 | 0.170742026 | 0.159494912 | 11819  | 2018   |
| 0.180669238 | 0.016304348 | 0.345034127 | 4600   | 75     |
| 0.673388184 | 0.833867094 | 0.512909274 | 7494   | 6249   |
| 0.954595303 | 0.850564925 | 1.05862568  | 30535  | 25972  |
| 0.837959761 | 0.541602515 | 1.134317006 | 46115  | 24976  |
| 0.187347204 | 0.081992104 | 0.292702304 | 9879   | 810    |
| 0.546987675 | 0.692397599 | 0.401577752 | 37646  | 26066  |
| 0.063920224 | 0.054351697 | 0.073488751 | 36503  | 1984   |
| 0.278768206 | 0.423430663 | 0.134105749 | 33597  | 14226  |
| 0.000109004 | 0           | 0.000218007 | 4427   | 0      |
| NA          | NA          | NA          | 0      | 0      |
| 0.459938908 | 0.803347787 | 0.11653003  | 41281  | 33163  |
| 1.136821022 | 1.414336918 | 0.859305126 | 12555  | 17757  |
| 0.007210873 | 0.000351973 | 0.014069774 | 45458  | 16     |
| 7.31913E-05 | 0.000111564 | 3.48189E-05 | 35854  | 4      |
| 0.018174308 | 0.02069689  | 0.015651726 | 66725  | 1381   |
| 0.00476048  | 0.002574918 | 0.006946042 | 208162 | 536    |
| 0.161960667 | 0.323389702 | 0.000531632 | 5263   | 1702   |
| 0.392569667 | 0.3563288   | 0.428810533 | 36326  | 12944  |
| 0.24003152  | 0.473695747 | 0.006367292 | 4562   | 2161   |
| 0.193635318 | 0.075057818 | 0.312212817 | 14269  | 1071   |
| 0.193845463 | 0.035309973 | 0.352380952 | 3710   | 131    |
| 0.107452217 | 0.170620438 | 0.044283995 | 4384   | 748    |
| 0.608381477 | 0.653331355 | 0.5634316   | 33695  | 22014  |
| 1.521441453 | 1.691804708 | 1.351078197 | 38998  | 65977  |

|             |             |             |       |        |
|-------------|-------------|-------------|-------|--------|
| 0.797831182 | 0.900645478 | 0.695016886 | 12239 | 11023  |
| 8.23E-05    | 0           | 0.0001646   | 11381 | 0      |
| 0.18069148  | 0.180119102 | 0.181263858 | 10915 | 1966   |
| 0.199934074 | 0.05129672  | 0.348571429 | 20976 | 1076   |
| 0.003342509 | 0           | 0.006685018 | 5428  | 0      |
| 0.137405083 | 0.097939189 | 0.176870978 | 29600 | 2899   |
| 0.040179039 | 0.047492416 | 0.032865662 | 50766 | 2411   |
| 0.00017313  | 0           | 0.00034626  | 7627  | 0      |
| 0.038294803 | 0.027488932 | 0.049100673 | 19426 | 534    |
| 0.377349359 | 0.44562685  | 0.309071868 | 15881 | 7077   |
| 0           | 0           | 0           | 8105  | 0      |
| 0.126767545 | 0.027322404 | 0.226212687 | 3477  | 95     |
| NA          | NA          | NA          | 424   | 0      |
| 0.012222377 | 0           | 0.024444755 | 5170  | 0      |
| 0.001721296 | 0.001794728 | 0.001647864 | 8915  | 16     |
| 2.55102E-05 | 5.10204E-05 | 0           | 19600 | 1      |
| 0           | 0           | 0           | 2249  | 0      |
| 0.79628381  | 1.371309831 | 0.22125779  | 27912 | 38276  |
| 0.441117913 | 0.586184524 | 0.296051303 | 23119 | 13552  |
| 0.143929674 | 0.043706114 | 0.244153234 | 29195 | 1276   |
| NA          | NA          | NA          | 0     | 0      |
| 0.066151971 | 0.049381188 | 0.082922753 | 40400 | 1995   |
| 0.189731658 | 0.000972526 | 0.37849079  | 4113  | 4      |
| 0.411566348 | 0.623313229 | 0.199819467 | 42611 | 26560  |
| 1.643161397 | 2.493088617 | 0.793234176 | 86958 | 216794 |
| 0.517510269 | 0.470614035 | 0.564406503 | 22800 | 10730  |
| 0.086579742 | 0           | 0.173159485 | 19087 | 0      |
| 0.146093257 | 0.000108015 | 0.292078499 | 9258  | 1      |
| 0.010401671 | 8.65726E-05 | 0.02071677  | 11551 | 1      |
| 1.391206827 | 2.779885057 | 0.002528597 | 10440 | 29022  |
| 1.190095337 | 0.963319847 | 1.416870827 | 37568 | 36190  |
| 0.079364105 | 0.021533706 | 0.137194504 | 28467 | 613    |
| 0.34737866  | 0.393661661 | 0.30109566  | 9056  | 3565   |

|             |             |             |        |         |
|-------------|-------------|-------------|--------|---------|
| 0.292843192 | 0.358163209 | 0.227523174 | 18271  | 6544    |
| 0.162091025 | 0.135760257 | 0.188421792 | 9944   | 1350    |
| 64.11298219 | 52.14726514 | 76.07869924 | 23950  | 1248927 |
| 1.013294698 | 1.206846418 | 0.819742977 | 7566   | 9131    |
| 0.008587566 | 0.010476801 | 0.006698332 | 9354   | 98      |
| 1.004772904 | 0.72139738  | 1.288148429 | 3435   | 2478    |
| 0.26726547  | 0.475359343 | 0.059171598 | 2922   | 1389    |
| 0.075539295 | 0.001624805 | 0.149453785 | 14771  | 24      |
| 0.281181984 | 0.520202721 | 0.042161246 | 14404  | 7493    |
| 0.082878502 | 0.005644644 | 0.16011236  | 7795   | 44      |
| 0.134401376 | 0.019676674 | 0.249126078 | 10825  | 213     |
| 0           | 0           | 0           | 634    | 0       |
| 0.024340683 | 0           | 0.048681366 | 22343  | 0       |
| 1.728939777 | 2.831898734 | 0.62598082  | 3950   | 11186   |
| 0           | 0           | 0           | 2903   | 0       |
| 0.042293799 | 0.084587598 | 0           | 6644   | 562     |
| 1.438726271 | 2.275190706 | 0.602261836 | 40114  | 91267   |
| 0.105590062 | 0           | 0.211180124 | 6940   | 0       |
| 0.134926536 | 0.248162305 | 0.021690768 | 3401   | 844     |
| 0.639579924 | 1.118636662 | 0.160523187 | 4577   | 5120    |
| 1.451209242 | 1.979805805 | 0.922612678 | 19362  | 38333   |
| 0.631165203 | 0.733237638 | 0.529092768 | 197153 | 144560  |
| 0.436869096 | 0.336818563 | 0.536919629 | 17885  | 6024    |
| 1.729713563 | 2.528467711 | 0.930959415 | 7851   | 19851   |
| 0.147707432 | 0.003062938 | 0.292351926 | 10121  | 31      |
| 0.131476192 | 0.093366665 | 0.169585719 | 51603  | 4818    |
| 0.276894538 | 0.290329505 | 0.26345957  | 9317   | 2705    |
| 0.023729675 | 0.026015228 | 0.021444122 | 28368  | 738     |
| 0.43015768  | 0.70883566  | 0.1514797   | 12608  | 8937    |
| 0.087373128 | 0.032567568 | 0.142178688 | 7400   | 241     |
| 1.118453529 | 1.035942224 | 1.200964834 | 8931   | 9252    |
| 0.316055067 | 0.208823529 | 0.423286604 | 2040   | 426     |
| 0.23257166  | 0.248811512 | 0.216331808 | 15566  | 3873    |

|             |             |             |       |         |
|-------------|-------------|-------------|-------|---------|
| 0.787448713 | 0.84617509  | 0.728722336 | 28968 | 24512   |
| 0.413766331 | 0.018150999 | 0.809381663 | 14159 | 257     |
| 0.271724181 | 0.467032967 | 0.076415394 | 7280  | 3400    |
| 0.211146978 | 0.364117918 | 0.058176038 | 21710 | 7905    |
| 0.04315097  | 0.061098763 | 0.025203178 | 41392 | 2529    |
| NA          | NA          | NA          | 981   | 0       |
| 1.159282043 | 1.459821841 | 0.858742245 | 43332 | 63257   |
| 0.148949431 | 0.165555092 | 0.132343769 | 14394 | 2383    |
| 0.036022476 | 0.05303979  | 0.019005162 | 24755 | 1313    |
| 0.000122991 | 0           | 0.000245982 | 14293 | 0       |
| 0.232027633 | 0.160600291 | 0.303454974 | 17858 | 2868    |
| 0.364602844 | 0.086260111 | 0.642945578 | 18792 | 1621    |
| 0           | 0           | 0           | 2362  | 0       |
| 0.221531023 | 0.111507818 | 0.331554227 | 30249 | 3373    |
| 0.21552915  | 0.207286174 | 0.223772125 | 14603 | 3027    |
| 0.118405846 | 0.003893381 | 0.232918312 | 3339  | 13      |
| 0.451595828 | 0.535251456 | 0.367940199 | 8411  | 4502    |
| 1.153548695 | 1.688711584 | 0.618385807 | 33840 | 57146   |
| 0.46036335  | 0.786028584 | 0.134698116 | 29317 | 23044   |
| 0.11066776  | 0.061904944 | 0.159430577 | 26153 | 1619    |
| 0.213806299 | 0.218937644 | 0.208674954 | 15155 | 3318    |
| 0.607874304 | 1.091527057 | 0.124221551 | 18683 | 20393   |
| 0.172543567 | 0.178539893 | 0.166547241 | 28313 | 5055    |
| 0           | 0           | 0           | 799   | 0       |
| 0.035563959 | 0.003878282 | 0.067249636 | 3352  | 13      |
| 0.08050899  | 0.120002107 | 0.041015873 | 18983 | 2278    |
| 0           | 0           | 0           | 1287  | 0       |
| 0.185891845 | 0           | 0.371783689 | 12192 | 0       |
| 0.101871507 | 0.169502565 | 0.03424045  | 12283 | 2082    |
| 0.464028994 | 0.638482699 | 0.28957529  | 20721 | 13230   |
| 0           | 0           | 0           | 2050  | 0       |
| 39.02044459 | 29.48150462 | 48.55938456 | 38415 | 1132532 |
| 0.051361802 | 0.102723605 | 0           | 11896 | 1222    |

|             |             |             |       |        |
|-------------|-------------|-------------|-------|--------|
| 2.889445252 | 4.275900073 | 1.502990431 | 10888 | 46556  |
| 0.027038126 | 0.047147846 | 0.006928406 | 1718  | 81     |
| 1.659875833 | 1.301821998 | 2.017929668 | 10483 | 13647  |
| 5.667513887 | 8.025575273 | 3.309452502 | 29247 | 234724 |
| 0.671956498 | 0.125396825 | 1.21851617  | 4410  | 553    |
| 0.277627685 | 0.414749573 | 0.140505797 | 15214 | 6310   |
| 0.369172133 | 0.397641112 | 0.340703153 | 15431 | 6136   |
| 0.029841397 | 0.009797964 | 0.049884831 | 13166 | 129    |
| 0.145361327 | 0.246381645 | 0.044341009 | 14993 | 3694   |
| 0.763237236 | 1.299479167 | 0.226995305 | 8832  | 11477  |
| 0.19664493  | 0.30078986  | 0.0925      | 10888 | 3275   |
| 0.109320414 | 0.188431483 | 0.030209345 | 12413 | 2339   |
| 0.27744907  | 0.176790744 | 0.378107396 | 26274 | 4645   |
| 0.345474467 | 0.457416001 | 0.233532934 | 28661 | 13110  |
| 0.117582645 | 0.231035335 | 0.004129956 | 4047  | 935    |
| 0           | 0           | 0           | 2642  | 0      |
| 0.225624714 | 0.208014266 | 0.243235162 | 9533  | 1983   |
| 5.976009675 | 3.943683037 | 8.008336314 | 36774 | 145025 |
| 0.166161562 | 0.03823709  | 0.294086035 | 29474 | 1127   |
| 0.574918385 | 0.45703001  | 0.692806761 | 28357 | 12960  |
| 0.101831674 | 0.067653641 | 0.136009708 | 11618 | 786    |
| 0.113264066 | 0.14391266  | 0.082615473 | 18136 | 2610   |
| 0.847881262 | 0.759523917 | 0.936238607 | 22181 | 16847  |
| 0.487657271 | 0.079701835 | 0.895612708 | 1744  | 139    |
| 0.333287943 | 0.426382841 | 0.240193045 | 6201  | 2644   |
| 0           | 0           | 0           | 4778  | 0      |
| 0.033647219 | 0.007321641 | 0.059972796 | 5873  | 43     |
| 0.133552973 | 0.166871585 | 0.100234361 | 29280 | 4886   |
| 0.984033005 | 1.765638646 | 0.202427363 | 36640 | 64693  |
| 0.268051697 | 0.342375668 | 0.193727726 | 7299  | 2499   |
| 6.230065777 | 7.131274131 | 5.328857422 | 7252  | 51716  |
| 0           | 0           | 0           | 11477 | 0      |
| 0.407196317 | 0.531783938 | 0.282608696 | 20309 | 10800  |

|             |             |             |       |        |
|-------------|-------------|-------------|-------|--------|
| 0.034680679 | 0           | 0.069361358 | 7240  | 0      |
| 0.124362265 | 0.177337952 | 0.071386579 | 10105 | 1792   |
| 0.281233349 | 0.168597717 | 0.393868982 | 23476 | 3958   |
| 0.036082039 | 0.064381611 | 0.007782466 | 9832  | 633    |
| 0.102705754 | 0.118006231 | 0.087405278 | 24075 | 2841   |
| 0.555290132 | 1.105784101 | 0.004796163 | 3233  | 3575   |
| 0.201223576 | 0.237695287 | 0.164751865 | 22979 | 5462   |
| 0.100536441 | 0           | 0.201072882 | 4110  | 0      |
| 4.496682919 | 5.749585661 | 3.243780178 | 32582 | 187333 |
| 0.349388033 | 0           | 0.698776065 | 2734  | 0      |
| 0.212521996 | 0.244648899 | 0.180395093 | 26303 | 6435   |
| 0.052050563 | 0.074190594 | 0.029910532 | 25111 | 1863   |
| 0.000185048 | 0.000370096 | 0           | 2702  | 1      |
| 0.306910194 | 0.366298636 | 0.247521752 | 33874 | 12408  |
| 0.130932283 | 0           | 0.261864566 | 9024  | 0      |
| 0           | 0           | 0           | 11830 | 0      |
| 0           | 0           | 0           | 1979  | 0      |
| 0.173798872 | 0           | 0.347597744 | 9139  | 0      |
| 0.516140607 | 0.49304499  | 0.539236223 | 18404 | 9074   |
| 0           | 0           | 0           | 19141 | 0      |
| 0           | 0           | 0           | 3987  | 0      |
| 0.254409407 | 0           | 0.508818813 | 2799  | 0      |
| 1.544048922 | 1.927461878 | 1.160635965 | 7017  | 13525  |
| 0.00769067  | 0.00522541  | 0.010155929 | 9760  | 51     |
| 0.16138236  | 0.206581683 | 0.116183036 | 11061 | 2285   |
| 0.443170347 | 0.001824633 | 0.884516062 | 9865  | 18     |
| 0.813201059 | 0.763236816 | 0.863165302 | 37679 | 28758  |
| 0.001449922 | 0           | 0.002899844 | 8924  | 0      |
| 1.277126142 | 1.595355855 | 0.958896428 | 11929 | 19031  |
| 1.121534494 | 0.83378821  | 1.409280778 | 14656 | 12220  |
| 0.431886028 | 0.596321373 | 0.267450683 | 45343 | 27039  |
| 0.175666404 | 0.146602132 | 0.204730676 | 35743 | 5240   |
| 0.524975639 | 0.491653823 | 0.558297455 | 38281 | 18821  |



|             |             |             |       |        |
|-------------|-------------|-------------|-------|--------|
| 0.116790353 | 0           | 0.233580705 | 3903  | 0      |
| 0.368685154 | 0.493047776 | 0.244322531 | 15175 | 7482   |
| 1.324294468 | 2.048844691 | 0.599744246 | 6838  | 14010  |
| 0.022964894 | 0.007424692 | 0.038505096 | 4714  | 35     |
| 0.11526632  | 0.108108108 | 0.122424533 | 12691 | 1372   |
| 0.001755618 | 0           | 0.003511236 | 3954  | 0      |
| 0.039791094 | 0.041071615 | 0.038510573 | 19186 | 788    |
| 0.485871904 | 0.850335377 | 0.121408431 | 48602 | 41328  |
| 0           | 0           | 0           | 20807 | 0      |
| 0.728677324 | 0.747851003 | 0.709503645 | 34551 | 25839  |
| 2.273232665 | 3.766706979 | 0.779758351 | 95918 | 361295 |
| 0.422721162 | 0.600757627 | 0.244684697 | 29566 | 17762  |
| 2.625498891 | 2.982654402 | 2.26834338  | 3805  | 11349  |
| 64.36949812 | 5.851261461 | 122.8877348 | 16687 | 97640  |
| 0.523945504 | 0.14720006  | 0.900690947 | 26447 | 3893   |
| 0.630071751 | 0.858078928 | 0.402064575 | 47005 | 40334  |
| 0.261363856 | 0.00010287  | 0.522624842 | 9721  | 1      |
| 0.29960417  | 0.043652785 | 0.555555556 | 7972  | 348    |
| 0           | 0           | 0           | 2050  | 0      |
| 1.204653902 | 1.789020893 | 0.620286911 | 2441  | 4367   |
| 0           | 0           | 0           | 6844  | 0      |
| 0.120099234 | 0.13903066  | 0.101167809 | 26843 | 3732   |
| 0.144990808 | 0.114695126 | 0.17528649  | 16679 | 1913   |
| 0.060153226 | 0.085591229 | 0.034715222 | 12770 | 1093   |
| 0.058058259 | 0.051273228 | 0.06484329  | 11624 | 596    |
| 0.068188614 | 0.039514731 | 0.096862497 | 5770  | 228    |
| 0.499759711 | 0.928847363 | 0.070672059 | 11131 | 10339  |
| 0.330222156 | 0.308341814 | 0.352102499 | 36359 | 11211  |
| 2.317079085 | 1.318543552 | 3.315614618 | 27519 | 36285  |
| 0.029381966 | 0.058763931 | 0           | 9870  | 580    |
| 1.993776879 | 3.221631126 | 0.765922632 | 44362 | 142918 |
| 1.358310257 | 1.871372176 | 0.845248338 | 27358 | 51197  |
| 0.041122487 | 0.005949233 | 0.07629574  | 7564  | 45     |

|             |             |             |       |        |
|-------------|-------------|-------------|-------|--------|
| 0.58531289  | 0.718171988 | 0.452453792 | 17571 | 12619  |
| 0.28858651  | 0.211572207 | 0.365600814 | 64966 | 13745  |
| 0.497636722 | 0.420658059 | 0.574615385 | 2401  | 1010   |
| 1.277510212 | 1.011704567 | 1.543315856 | 62796 | 63531  |
| 0.048358827 | 0.096717655 | 0           | 6276  | 607    |
| 1.139381303 | 0.697955118 | 1.580807487 | 51201 | 35736  |
| 0.478996919 | 0.42942241  | 0.528571429 | 13262 | 5695   |
| 0.111911328 | 0.109925123 | 0.113897532 | 31385 | 3450   |
| 0.061983148 | 0.031042902 | 0.092923394 | 8601  | 267    |
| NA          | NA          | NA          | 1065  | 1      |
| 0.122921318 | 0.012626263 | 0.233216374 | 3564  | 45     |
| 0.254051618 | 0.175833833 | 0.332269403 | 25035 | 4402   |
| 0.319959074 | 0.472527473 | 0.167390675 | 2730  | 1290   |
| 0.29489203  | 0.052753713 | 0.537030347 | 6464  | 341    |
| 17.22570286 | 0.2671952   | 34.18421053 | 14001 | 3741   |
| 0.908903305 | 0.390760346 | 1.427046263 | 1039  | 406    |
| 0.310486428 | 0.43330104  | 0.187671816 | 53674 | 23257  |
| 0.164332887 | 0.186081505 | 0.14258427  | 7975  | 1484   |
| 0.038897596 | 0.009535553 | 0.06825964  | 12165 | 116    |
| 0.931503481 | 0.196846112 | 1.66616085  | 3678  | 724    |
| 4.641855236 | 4.328129783 | 4.95558069  | 13068 | 56560  |
| 1.075866425 | 1.751019313 | 0.400713536 | 18640 | 32639  |
| 1.5705291   | 1.884518877 | 1.256539322 | 17137 | 32295  |
| 1.736188537 | 3.037108334 | 0.43526874  | 33766 | 102551 |
| 2.286589128 | 3.113532021 | 1.459646236 | 12851 | 40012  |
| 1.513599735 | 2.458444271 | 0.568755198 | 24413 | 60018  |
| 0.035307517 | 0           | 0.070615034 | 8164  | 0      |
| 0           | 0           | 0           | 1840  | 0      |
| 0           | 0           | 0           | 2142  | 0      |
| 2.408515669 | 4.387538327 | 0.429493011 | 9132  | 40067  |
| 0.042069153 | 0.061053985 | 0.023084322 | 7780  | 475    |
| 0.247222355 | 0.260246645 | 0.234198065 | 33084 | 8610   |
| 0           | 0           | 0           | 15206 | 0      |

|             |             |             |        |        |
|-------------|-------------|-------------|--------|--------|
| 0.077594328 | 0.146670387 | 0.008518269 | 10752  | 1577   |
| 18.17214402 | 17.05537669 | 19.28891135 | 9318   | 158922 |
| 0.540832199 | 0.657836623 | 0.423827774 | 102793 | 67621  |
| 0.175116794 | 0.093333854 | 0.256899734 | 25607  | 2390   |
| 0.723659143 | 1.142793941 | 0.304524346 | 47467  | 54245  |
| 0.904200829 | 1.579513299 | 0.228888359 | 5301   | 8373   |
| 0.470434488 | 0.340148963 | 0.600720013 | 21079  | 7170   |
| 0.121372859 | 0.0001485   | 0.242597217 | 20202  | 3      |
| 0.209818088 | 0.240167026 | 0.179469151 | 14848  | 3566   |
| 0.003690779 | 0.001781142 | 0.005600417 | 8983   | 16     |
| 0.000537019 | 4.10931E-05 | 0.001032946 | 24335  | 1      |
| 1.108399963 | 1.304866171 | 0.911933755 | 25667  | 33492  |
| 0.11091394  | 0.105350477 | 0.116477403 | 36165  | 3810   |
| 0           | 0           | 0           | 1740   | 0      |
| 0.364395259 | 0.140090029 | 0.588700489 | 14662  | 2054   |
| 0.746392031 | 0.784340702 | 0.708443359 | 31981  | 25084  |
| 0.057297605 | 0.114595211 | 0           | 3508   | 402    |
| 1.074939471 | 1.697942922 | 0.45193602  | 24598  | 41766  |

| Reads_B_T0 | Reads_B_T14 |
|------------|-------------|
| 31158      | 4111        |
| 4311       | 5737        |
| 4751       | 500         |
| 24711      | 15331       |
| 9328       | 21          |
| 3211       | 3           |
| 10809      | 4116        |
| 5753       | 1704        |
| 8262       | 3861        |
| 7080       | 2636        |
| 3326       | 9           |
| 12207      | 1787        |
| 4553       | 190         |
| 8307       | 3674        |
| 16162      | 7253        |
| 3          | 0           |
| 32507      | 6981        |
| 21977      | 5244        |
| 10813      | 628         |
| 6161       | 1141        |
| 13945      | 986         |
| 223886     | 199915      |
| 6635       | 18          |
| 11901      | 2001        |
| 27662      | 4349        |
| 13761      | 0           |
| 35694      | 11615       |
| 24446      | 2818        |
| 570        | 0           |
| 13553      | 8157        |
| 19956      | 482         |
| 16296      | 11351       |

|        |       |
|--------|-------|
| 19785  | 7504  |
| 22222  | 1182  |
| 9514   | 649   |
| 54356  | 55586 |
| 7366   | 810   |
| 4290   | 434   |
| 13967  | 1888  |
| 17368  | 6663  |
| 1015   | 413   |
| 4104   | 1254  |
| 19230  | 836   |
| 6275   | 14168 |
| 7327   | 463   |
| 1998   | 98    |
| 4313   | 1015  |
| 23317  | 9903  |
| 0      | 0     |
| 17111  | 8040  |
| 9094   | 418   |
| 13876  | 499   |
| 23697  | 1250  |
| 7961   | 0     |
| 14372  | 19643 |
| 8348   | 0     |
| 25957  | 5963  |
| 112860 | 23911 |
| 16153  | 13589 |
| 7499   | 76    |
| 2454   | 0     |
| 6196   | 1408  |
| 14242  | 2136  |
| 1274   | 40    |
| 20344  | 3929  |

|        |        |
|--------|--------|
| 8110   | 1459   |
| 17635  | 135473 |
| 32941  | 360    |
| 5894   | 858    |
| 8464   | 14     |
| 16774  | 9788   |
| 7381   | 297    |
| 3360   | 70     |
| 1689   | 0      |
| 6727   | 502    |
| 16476  | 10861  |
| 7113   | 7350   |
| 5627   | 4388   |
| 7167   | 756    |
| 2560   | 1      |
| 14007  | 9115   |
| 6540   | 93     |
| 14675  | 4199   |
| 12090  | 1400   |
| 22783  | 0      |
| 1337   | 0      |
| 58914  | 6748   |
| 5750   | 0      |
| 6301   | 1752   |
| 25011  | 22498  |
| 11243  | 1759   |
| 2340   | 0      |
| 16672  | 1194   |
| 29930  | 1459   |
| 8435   | 235    |
| 25881  | 16627  |
| 252403 | 96275  |
| 38833  | 3552   |

|       |       |
|-------|-------|
| 24272 | 47962 |
| 3889  | 732   |
| 42739 | 11998 |
| 12893 | 662   |
| 2985  | 0     |
| 19761 | 57153 |
| 7256  | 279   |
| 1645  | 44    |
| 1478  | 90    |
| 16080 | 1     |
| 41908 | 2295  |
| 9122  | 88    |
| 4235  | 2236  |
| 62100 | 1030  |
| 4085  | 0     |
| 8625  | 0     |
| 13467 | 2049  |
| 12300 | 0     |
| 7502  | 1189  |
| 5712  | 860   |
| 4529  | 0     |
| 2116  | 1032  |
| 5147  | 5     |
| 2118  | 68    |
| 49270 | 78522 |
| 10338 | 2367  |
| 10274 | 7958  |
| 6473  | 768   |
| 3394  | 910   |
| 1822  | 0     |
| 1608  | 235   |
| 4982  | 1298  |
| 12341 | 9903  |

|       |       |
|-------|-------|
| 3119  | 0     |
| 17078 | 1812  |
| 22424 | 4795  |
| 5860  | 0     |
| 16087 | 3528  |
| 6939  | 16366 |
| 4193  | 744   |
| 67617 | 50333 |
| 4281  | 1847  |
| 9880  | 5888  |
| 21845 | 21774 |
| 563   | 0     |
| 14591 | 3062  |
| 26002 | 16192 |
| 2459  | 831   |
| 4578  | 8     |
| 2014  | 5254  |
| 41754 | 5931  |
| 1093  | 2766  |
| 20037 | 7607  |
| 44824 | 10473 |
| 7318  | 594   |
| 7765  | 1175  |
| 4027  | 305   |
| 11203 | 1803  |
| 14065 | 1023  |
| 10096 | 1833  |
| 18818 | 4414  |
| 88227 | 77242 |
| 8656  | 0     |
| 1879  | 0     |
| 42693 | 4155  |
| 3122  | 0     |



|       |       |
|-------|-------|
| 6501  | 805   |
| 14305 | 0     |
| 10452 | 2885  |
| 4039  | 327   |
| 47141 | 5029  |
| 10681 | 317   |
| 8891  | 1151  |
| 17844 | 3550  |
| 18409 | 694   |
| 9271  | 1687  |
| 3653  | 467   |
| 9889  | 4110  |
| 14491 | 1390  |
| 17139 | 6180  |
| 28160 | 5299  |
| 19522 | 2258  |
| 48691 | 2032  |
| 2967  | 437   |
| 16629 | 2181  |
| 15608 | 2384  |
| 11414 | 658   |
| 5216  | 14343 |
| 20787 | 4073  |
| 9449  | 3     |
| 0     | 0     |
| 24617 | 1474  |
| 17413 | 13691 |
| 23079 | 1480  |
| 8113  | 23821 |
| 14891 | 832   |
| 24064 | 32029 |
| 4482  | 283   |
| 9494  | 952   |

|       |       |
|-------|-------|
| 8227  | 3677  |
| 7143  | 2341  |
| 5596  | 15544 |
| 24339 | 10329 |
| 23035 | 13811 |
| 3680  | 681   |
| 3325  | 5096  |
| 13580 | 0     |
| 15274 | 35713 |
| 47380 | 90425 |
| 10249 | 963   |
| 29506 | 678   |
| 5390  | 15209 |
| 31316 | 8951  |
| 4353  | 547   |
| 6533  | 3211  |
| 30632 | 61226 |
| 6185  | 1879  |
| 13658 | 32530 |
| 7634  | 960   |
| 6154  | 0     |
| 5748  | 28129 |
| 9232  | 8683  |
| 14067 | 1155  |
| 11472 | 31243 |
| 8756  | 87465 |
| 67042 | 33661 |
| 6955  | 921   |
| 9881  | 1230  |
| 5404  | 119   |
| 79952 | 45160 |
| 21861 | 13433 |
| 14694 | 712   |

|        |        |
|--------|--------|
| 15103  | 1803   |
| 11257  | 5220   |
| 18850  | 3756   |
| 18179  | 11546  |
| 835    | 0      |
| 27126  | 5348   |
| 25053  | 19190  |
| 12204  | 7974   |
| 4466   | 1933   |
| 37771  | 2350   |
| 900    | 0      |
| 19314  | 2525   |
| 13284  | 12279  |
| 39231  | 63096  |
| 9359   | 279    |
| 21886  | 8356   |
| 91811  | 371738 |
| 4350   | 967    |
| 15840  | 4413   |
| 14535  | 41     |
| 5321   | 0      |
| 7206   | 133    |
| 109791 | 48867  |
| 16355  | 4238   |
| 9512   | 8646   |
| 13122  | 7740   |
| 18782  | 28     |
| 1      | 0      |
| 2461   | 0      |
| 27227  | 22193  |
| 3054   | 1061   |
| 6144   | 0      |
| 2177   | 2420   |

|       |        |
|-------|--------|
| 9736  | 1277   |
| 13925 | 4446   |
| 27904 | 16057  |
| 9199  | 1968   |
| 14264 | 1849   |
| 14121 | 1112   |
| 4431  | 0      |
| 17602 | 11188  |
| 39480 | 698    |
| 25394 | 8774   |
| 29844 | 5995   |
| 1902  | 619    |
| 18080 | 5314   |
| 20410 | 28859  |
| 15507 | 1799   |
| 65502 | 105110 |
| 17522 | 6441   |
| 3858  | 1293   |
| 34576 | 8831   |
| 88361 | 18872  |
| 2265  | 0      |
| 15786 | 8109   |
| 13764 | 0      |
| 19363 | 7218   |
| 10956 | 2142   |
| 10876 | 5893   |
| 20381 | 4673   |
| 12076 | 0      |
| 11794 | 7368   |
| 14790 | 23     |
| 19102 | 1933   |
| 13554 | 437    |
| 48931 | 26824  |

|       |        |
|-------|--------|
| 4817  | 0      |
| 18297 | 1698   |
| 25177 | 307    |
| 36600 | 5763   |
| 23583 | 938    |
| 6371  | 7108   |
| 5211  | 3390   |
| 0     | 0      |
| 7301  | 4240   |
| 29619 | 30045  |
| 2857  | 3113   |
| 3572  | 1105   |
| 9427  | 3236   |
| 2808  | 898    |
| 16542 | 4081   |
| 36467 | 37036  |
| 24923 | 1861   |
| 25517 | 49     |
| 12154 | 10033  |
| 1217  | 0      |
| 15296 | 5301   |
| 25071 | 266575 |
| 4500  | 248    |
| 892   | 701    |
| 14709 | 3408   |
| 8133  | 314    |
| 6347  | 0      |
| 3763  | 0      |
| 21153 | 395    |
| 6272  | 169    |
| 5825  | 4725   |
| 1255  | 0      |
| 17456 | 2979   |

|        |        |
|--------|--------|
| 7562   | 997    |
| 1042   | 0      |
| 104    | 0      |
| 38434  | 3532   |
| 9425   | 3732   |
| 2028   | 4      |
| 1697   | 3      |
| 0      | 0      |
| 19923  | 52176  |
| 11556  | 616    |
| 14531  | 1446   |
| 8597   | 3468   |
| 17871  | 32768  |
| 9387   | 2634   |
| 22233  | 10393  |
| 7024   | 236    |
| 13562  | 1762   |
| 5225   | 0      |
| 26279  | 31357  |
| 6908   | 1939   |
| 48020  | 9574   |
| 279877 | 354180 |
| 10447  | 5453   |
| 8953   | 2868   |
| 27161  | 4598   |
| 9882   | 1262   |
| 3200   | 35     |
| 44678  | 2972   |
| 9753   | 0      |
| 5428   | 576    |
| 13398  | 2392   |
| 4640   | 0      |
| 7166   | 15784  |

|       |       |
|-------|-------|
| 0     | 0     |
| 13575 | 906   |
| 15942 | 1310  |
| 4388  | 1     |
| 33308 | 23388 |
| 1897  | 0     |
| 3435  | 986   |
| 5499  | 365   |
| 35230 | 5020  |
| 1339  | 0     |
| 18548 | 32335 |
| 44610 | 9355  |
| 62733 | 11276 |
| 5431  | 16    |
| 11530 | 925   |
| 17908 | 57900 |
| 4619  | 0     |
| 6286  | 986   |
| 19062 | 1466  |
| 9201  | 22187 |
| 1195  | 991   |
| 19717 | 2146  |
| 2229  | 0     |
| 29847 | 6138  |
| 1204  | 121   |
| 11404 | 3505  |
| 8759  | 209   |
| 0     | 0     |
| 2043  | 0     |
| 9262  | 5129  |
| 26787 | 20564 |
| 6840  | 0     |
| 7502  | 10495 |

|       |        |
|-------|--------|
| 34192 | 6997   |
| 30076 | 1172   |
| 5696  | 805    |
| 3737  | 0      |
| 9430  | 2980   |
| 29902 | 2130   |
| 26207 | 12759  |
| 14512 | 952    |
| 13666 | 458    |
| 17044 | 2570   |
| 56073 | 20783  |
| 43689 | 11794  |
| 2614  | 2157   |
| 0     | 0      |
| 28532 | 1538   |
| 5844  | 8448   |
| 32398 | 1612   |
| 7043  | 211    |
| 9835  | 0      |
| 5932  | 4706   |
| 5451  | 536    |
| 22885 | 6226   |
| 80380 | 23580  |
| 24907 | 146870 |
| 3035  | 1096   |
| 4733  | 244    |
| 29144 | 11601  |
| 10102 | 11     |
| 10696 | 1439   |
| 32782 | 6050   |
| 22774 | 33294  |
| 9044  | 10376  |
| 44701 | 184145 |



|        |       |
|--------|-------|
| 4415   | 24593 |
| 18014  | 2648  |
| 10379  | 22760 |
| 19211  | 5470  |
| 4344   | 926   |
| 33011  | 4446  |
| 5159   | 527   |
| 6      | 0     |
| 0      | 0     |
| 5343   | 1689  |
| 10059  | 1381  |
| 3478   | 953   |
| 12323  | 10740 |
| 527    | 398   |
| 24893  | 11026 |
| 12341  | 0     |
| 12462  | 2316  |
| 2996   | 282   |
| 32548  | 13433 |
| 5944   | 278   |
| 85527  | 65202 |
| 769    | 0     |
| 32979  | 3416  |
| 21403  | 14704 |
| 121764 | 31402 |
| 5135   | 953   |
| 33250  | 9317  |
| 9975   | 0     |
| 13083  | 677   |
| 5622   | 948   |
| 5434   | 5389  |
| 20694  | 20823 |
| 7649   | 4     |

|        |        |
|--------|--------|
| 7204   | 5711   |
| 40110  | 68843  |
| 9964   | 9327   |
| 8029   | 3525   |
| 11473  | 0      |
| 27602  | 2788   |
| 17779  | 16014  |
| 17970  | 5289   |
| 3711   | 1090   |
| 16049  | 2421   |
| 8804   | 1545   |
| 55742  | 948    |
| 7955   | 5      |
| 13831  | 9568   |
| 97185  | 116026 |
| 6977   | 11481  |
| 26581  | 38183  |
| 13755  | 3513   |
| 11148  | 18647  |
| 19860  | 7108   |
| 40729  | 16482  |
| 3782   | 975    |
| 3009   | 8145   |
| 7416   | 180    |
| 106864 | 7826   |
| 13293  | 582    |
| 16741  | 12010  |
| 7118   | 1684   |
| 37642  | 20063  |
| 8612   | 2395   |
| 26494  | 24409  |
| 14988  | 21455  |
| 5612   | 1456   |

|        |       |
|--------|-------|
| 3752   | 1488  |
| 12059  | 4238  |
| 7459   | 9     |
| 11700  | 729   |
| 3885   | 1044  |
| 16364  | 76    |
| 39980  | 9096  |
| 5800   | 1718  |
| 2203   | 533   |
| 10067  | 9758  |
| 8972   | 241   |
| 31383  | 275   |
| 15500  | 1335  |
| 12258  | 933   |
| 110981 | 31184 |
| 10353  | 790   |
| 2249   | 10    |
| 2367   | 4568  |
| 887    | 4382  |
| 10253  | 43152 |
| 5207   | 2071  |
| 8067   | 1344  |
| 136893 | 60944 |
| 3595   | 0     |
| 4854   | 0     |
| 40349  | 10227 |
| 264    | 0     |
| 34829  | 20101 |
| 19461  | 5684  |
| 51151  | 28391 |
| 5898   | 0     |
| 2907   | 8855  |
| 2335   | 1159  |

|        |       |
|--------|-------|
| 43503  | 12431 |
| 11686  | 68360 |
| 631    | 0     |
| 23621  | 922   |
| 5382   | 0     |
| 14130  | 2172  |
| 16994  | 8314  |
| 32681  | 16788 |
| 23168  | 13194 |
| 9165   | 1433  |
| 694    | 1     |
| 15420  | 5997  |
| 11111  | 3994  |
| 18694  | 2741  |
| 3734   | 1034  |
| 20638  | 1385  |
| 68767  | 7293  |
| 2169   | 11    |
| 8532   | 469   |
| 166843 | 91277 |
| 4469   | 298   |
| 6411   | 846   |
| 9133   | 333   |
| 10776  | 2107  |
| 13756  | 10    |
| 5141   | 7256  |
| 31423  | 2532  |
| 49261  | 23120 |
| 15004  | 2583  |
| 10811  | 997   |
| 20814  | 10559 |
| 12423  | 800   |
| 65359  | 33264 |

|       |        |
|-------|--------|
| 2915  | 114    |
| 24540 | 25052  |
| 16734 | 5558   |
| 8337  | 543    |
| 36421 | 2180   |
| 1031  | 0      |
| 19287 | 0      |
| 1963  | 0      |
| 3747  | 611    |
| 20256 | 25007  |
| 27103 | 9050   |
| 7213  | 1318   |
| 2666  | 1515   |
| 13919 | 1630   |
| 13506 | 2427   |
| 56921 | 427295 |
| 6613  | 3666   |
| 2941  | 9      |
| 18956 | 3166   |
| 15618 | 2029   |
| 24834 | 3541   |
| 759   | 0      |
| 31277 | 1745   |
| 5210  | 10868  |
| 9114  | 3637   |
| 2642  | 15030  |
| 28105 | 234314 |
| 42025 | 455810 |
| 1813  | 883    |
| 12182 | 9160   |
| 5156  | 0      |
| 8940  | 6153   |
| 50764 | 123575 |

|       |        |
|-------|--------|
| 22313 | 707    |
| 19962 | 410    |
| 15916 | 1451   |
| 27963 | 287    |
| 19247 | 3840   |
| 2028  | 0      |
| 7201  | 4263   |
| 13119 | 1381   |
| 19777 | 22940  |
| 210   | 0      |
| 14741 | 766    |
| 12773 | 126    |
| 14805 | 1384   |
| 1746  | 0      |
| 3939  | 0      |
| 9230  | 1181   |
| 27171 | 9881   |
| 13022 | 226    |
| 6117  | 0      |
| 23724 | 15872  |
| 3597  | 0      |
| 4468  | 925    |
| 82269 | 41547  |
| 52804 | 161235 |
| 5826  | 3312   |
| 21876 | 2265   |
| 1102  | 0      |
| 2861  | 0      |
| 1398  | 0      |
| 11421 | 13526  |
| 26576 | 30244  |
| 3110  | 302    |
| 19154 | 12044  |

|       |        |
|-------|--------|
| 14141 | 2193   |
| 22142 | 61368  |
| 22291 | 4467   |
| 16118 | 71731  |
| 37336 | 5837   |
| 17595 | 1953   |
| 18837 | 65021  |
| 9099  | 1446   |
| 10120 | 0      |
| 15216 | 2247   |
| 12730 | 355    |
| 10526 | 15256  |
| 13704 | 246034 |
| 40917 | 2939   |
| 6952  | 6      |
| 2318  | 8      |
| 15348 | 10926  |
| 12819 | 13390  |
| 4303  | 512    |
| 7232  | 527    |
| 3092  | 724    |
| 9099  | 734    |
| 8156  | 3874   |
| 17410 | 2131   |
| 39109 | 13800  |
| 69312 | 43078  |
| 415   | 238    |
| 17611 | 11484  |
| 29222 | 334    |
| 4923  | 3308   |
| 18150 | 408    |
| 7592  | 9678   |
| 9327  | 5213   |

|       |        |
|-------|--------|
| 7850  | 1      |
| 8032  | 523    |
| 10456 | 567    |
| 4516  | 94     |
| 4481  | 6581   |
| 14110 | 13     |
| 22581 | 8646   |
| 12332 | 0      |
| 6975  | 0      |
| 6587  | 0      |
| 9708  | 16966  |
| 1909  | 54     |
| 15745 | 701    |
| 7788  | 681    |
| 8084  | 2341   |
| 16181 | 1171   |
| 6945  | 80501  |
| 9620  | 2649   |
| 45697 | 3247   |
| 22111 | 91808  |
| 16730 | 13912  |
| 43757 | 46048  |
| 27671 | 10380  |
| 6110  | 49     |
| 22113 | 2903   |
| 28473 | 14390  |
| 20019 | 3606   |
| 19763 | 17914  |
| 8380  | 1106   |
| 28292 | 852487 |
| 7370  | 7007   |
| 34007 | 14026  |
| 48176 | 293    |



|       |        |
|-------|--------|
| 21335 | 0      |
| 26321 | 1012   |
| 12636 | 2567   |
| 6817  | 360    |
| 11408 | 1727   |
| 17489 | 1720   |
| 3400  | 2394   |
| 41687 | 56982  |
| 45140 | 127055 |
| 45369 | 25710  |
| 21593 | 2593   |
| 6245  | 3      |
| 3338  | 0      |
| 16062 | 0      |
| 10179 | 1715   |
| 257   | 0      |
| 26676 | 10184  |
| 22189 | 5681   |
| 12326 | 1021   |
| 17495 | 2820   |
| 6452  | 659    |
| 6519  | 74     |
| 4367  | 6545   |
| 35774 | 3435   |
| 18678 | 2910   |
| 11194 | 719    |
| 8248  | 0      |
| 9378  | 903    |
| 1394  | 36     |
| 45331 | 6294   |
| 6858  | 1530   |
| 8398  | 2032   |
| 14848 | 1285   |

|       |        |
|-------|--------|
| 7190  | 522    |
| 39030 | 28743  |
| 6306  | 626    |
| 26691 | 198619 |
| 964   | 1006   |
| 19712 | 753    |
| 24072 | 8085   |
| 6453  | 2689   |
| 3280  | 39     |
| 2137  | 128    |
| 18192 | 2265   |
| 4574  | 4312   |
| 1351  | 44     |
| 7058  | 31     |
| 8877  | 5507   |
| 17010 | 2809   |
| 11491 | 850    |
| 23775 | 9678   |
| 12654 | 158    |
| 75    | 0      |
| 37005 | 22671  |
| 34452 | 72617  |
| 6535  | 313    |
| 12039 | 7427   |
| 0     | 0      |
| 19758 | 407    |
| 7412  | 1599   |
| 27413 | 5021   |
| 4929  | 841    |
| 1329  | 3      |
| 13747 | 1087   |
| 71    | 0      |
| 16584 | 2824   |

|       |        |
|-------|--------|
| 6870  | 1405   |
| 2450  | 2925   |
| 26070 | 15137  |
| 9250  | 75     |
| 38933 | 5747   |
| 13953 | 3896   |
| 8331  | 542    |
| 1661  | 1      |
| 22244 | 10919  |
| 8032  | 922    |
| 24864 | 11608  |
| 9245  | 4796   |
| 1667  | 611    |
| 32679 | 6714   |
| 16946 | 1937   |
| 8342  | 164    |
| 458   | 0      |
| 47732 | 100294 |
| 3379  | 89     |
| 18454 | 170    |
| 4279  | 35     |
| 1923  | 614    |
| 21    | 0      |
| 2936  | 119    |
| 23709 | 4690   |
| 6961  | 1803   |
| 1449  | 947    |
| 10168 | 2609   |
| 1423  | 2661   |
| 18422 | 1862   |
| 55341 | 9030   |
| 26429 | 23619  |
| 25371 | 8374   |

|       |       |
|-------|-------|
| 7173  | 183   |
| 12546 | 9225  |
| 4843  | 0     |
| 10344 | 10105 |
| 4409  | 0     |
| 10218 | 1     |
| 29743 | 86471 |
| 37898 | 4768  |
| 6325  | 498   |
| 613   | 677   |
| 40157 | 9218  |
| 7676  | 1360  |
| 8176  | 31947 |
| 12340 | 822   |
| 4611  | 168   |
| 7729  | 1099  |
| 9278  | 4263  |
| 1139  | 16    |
| 44665 | 25418 |
| 22146 | 2492  |
| 12595 | 48    |
| 13065 | 1089  |
| 32121 | 9345  |
| 30364 | 11859 |
| 10199 | 41    |
| 32704 | 4795  |
| 4395  | 73    |
| 7223  | 0     |
| 24019 | 775   |
| 13615 | 0     |
| 56080 | 947   |
| 17367 | 4542  |
| 1290  | 15    |

|        |        |
|--------|--------|
| 32454  | 27646  |
| 6013   | 66     |
| 28644  | 25077  |
| 32701  | 4      |
| 11246  | 825    |
| 10292  | 13922  |
| 344553 | 620131 |
| 1582   | 863    |
| 8157   | 1301   |
| 7179   | 2477   |
| 13866  | 7112   |
| 25569  | 27068  |
| 46018  | 52199  |
| 8811   | 2579   |
| 40057  | 16086  |
| 34359  | 2525   |
| 54979  | 7373   |
| 4587   | 1      |
| 0      | 0      |
| 38179  | 4449   |
| 8721   | 7494   |
| 57357  | 807    |
| 28720  | 1      |
| 54371  | 851    |
| 199970 | 1389   |
| 7524   | 4      |
| 26886  | 11529  |
| 5968   | 38     |
| 12405  | 3873   |
| 1155   | 407    |
| 4155   | 184    |
| 30190  | 17010  |
| 44426  | 60023  |

|       |       |
|-------|-------|
| 14509 | 10084 |
| 18226 | 3     |
| 9020  | 1635  |
| 17850 | 6222  |
| 10172 | 68    |
| 29677 | 5249  |
| 51817 | 1703  |
| 8664  | 3     |
| 23462 | 1152  |
| 15278 | 4722  |
| 9809  | 0     |
| 4288  | 970   |
| 150   | 0     |
| 7159  | 175   |
| 7889  | 13    |
| 30802 | 0     |
| 1736  | 0     |
| 31452 | 6959  |
| 19804 | 5863  |
| 25869 | 6316  |
| 0     | 0     |
| 34707 | 2878  |
| 3366  | 1274  |
| 45421 | 9076  |
| 99707 | 79091 |
| 18391 | 10380 |
| 12578 | 2178  |
| 6981  | 2039  |
| 13226 | 274   |
| 8305  | 21    |
| 41634 | 58990 |
| 24673 | 3385  |
| 14238 | 4287  |

|        |         |
|--------|---------|
| 15427  | 3510    |
| 9967   | 1878    |
| 26938  | 2049408 |
| 8793   | 7208    |
| 8211   | 55      |
| 2641   | 3402    |
| 1521   | 90      |
| 12907  | 1929    |
| 12974  | 547     |
| 3204   | 513     |
| 8582   | 2138    |
| 1702   | 0       |
| 23130  | 1126    |
| 4588   | 2872    |
| 3390   | 0       |
| 7276   | 0       |
| 52170  | 31420   |
| 4025   | 850     |
| 1798   | 39      |
| 5887   | 945     |
| 23363  | 21555   |
| 193622 | 102444  |
| 15615  | 8384    |
| 6431   | 5987    |
| 8695   | 2542    |
| 41566  | 7049    |
| 4885   | 1287    |
| 27560  | 591     |
| 23079  | 3496    |
| 6738   | 958     |
| 7877   | 9460    |
| 2568   | 1087    |
| 20108  | 4350    |

|       |         |
|-------|---------|
| 24897 | 18143   |
| 11725 | 9490    |
| 12576 | 961     |
| 25165 | 1464    |
| 43804 | 1104    |
| 444   | 671     |
| 35460 | 30451   |
| 24051 | 3183    |
| 21310 | 405     |
| 12196 | 3       |
| 28828 | 8748    |
| 18577 | 11944   |
| 2342  | 0       |
| 28104 | 9318    |
| 8531  | 1909    |
| 3293  | 767     |
| 6020  | 2215    |
| 25759 | 15929   |
| 26964 | 3632    |
| 25359 | 4043    |
| 11343 | 2367    |
| 21196 | 2633    |
| 19538 | 3254    |
| 685   | 0       |
| 4803  | 323     |
| 7875  | 323     |
| 1543  | 0       |
| 9172  | 3410    |
| 7827  | 268     |
| 19425 | 5625    |
| 1324  | 0       |
| 46081 | 2237665 |
| 13262 | 0       |



|       |        |
|-------|--------|
| 5016  | 7539   |
| 4763  | 33     |
| 10095 | 20371  |
| 29717 | 98347  |
| 7885  | 9608   |
| 16647 | 2339   |
| 13795 | 4700   |
| 15195 | 758    |
| 16328 | 724    |
| 8520  | 1934   |
| 9600  | 888    |
| 11321 | 342    |
| 19349 | 7316   |
| 28557 | 6669   |
| 3632  | 15     |
| 8094  | 0      |
| 6689  | 1627   |
| 36347 | 291079 |
| 40937 | 12039  |
| 30056 | 20823  |
| 9889  | 1345   |
| 24378 | 2014   |
| 24576 | 23009  |
| 1322  | 1184   |
| 8081  | 1941   |
| 8728  | 0      |
| 8087  | 485    |
| 27735 | 2780   |
| 27190 | 5504   |
| 7015  | 1359   |
| 12288 | 65481  |
| 9246  | 0      |
| 20516 | 5798   |

|       |       |
|-------|-------|
| 6185  | 429   |
| 11907 | 850   |
| 24531 | 9662  |
| 10665 | 83    |
| 30616 | 2676  |
| 2919  | 14    |
| 25329 | 4173  |
| 5406  | 1087  |
| 27131 | 88007 |
| 4412  | 3083  |
| 28044 | 5059  |
| 34202 | 1023  |
| 2989  | 0     |
| 23101 | 5718  |
| 5331  | 1396  |
| 10214 | 0     |
| 1920  | 0     |
| 5141  | 1787  |
| 12412 | 6693  |
| 16741 | 0     |
| 5301  | 0     |
| 3742  | 1904  |
| 9120  | 10585 |
| 9748  | 99    |
| 8960  | 1041  |
| 9681  | 8563  |
| 31264 | 26986 |
| 8966  | 26    |
| 17833 | 17100 |
| 13167 | 18556 |
| 52720 | 14100 |
| 31412 | 6431  |
| 28569 | 15950 |

|        |         |
|--------|---------|
| 5390   | 1259    |
| 15676  | 3830    |
| 10166  | 6097    |
| 1766   | 68      |
| 12522  | 1533    |
| 4272   | 15      |
| 22747  | 876     |
| 42913  | 5210    |
| 26947  | 0       |
| 37312  | 26473   |
| 105525 | 82284   |
| 30431  | 7446    |
| 4811   | 10913   |
| 11553  | 1419722 |
| 17078  | 15382   |
| 56864  | 22863   |
| 11094  | 5798    |
| 4563   | 2535    |
| 3001   | 0       |
| 7877   | 4886    |
| 10490  | 0       |
| 31512  | 3188    |
| 13264  | 2325    |
| 15872  | 551     |
| 15283  | 991     |
| 4749   | 460     |
| 15579  | 1101    |
| 35981  | 12669   |
| 22274  | 73852   |
| 7343   | 0       |
| 47668  | 36510   |
| 25570  | 21613   |
| 9319   | 711     |

|       |        |
|-------|--------|
| 15690 | 7099   |
| 77653 | 28390  |
| 2600  | 1494   |
| 58362 | 90071  |
| 7252  | 0      |
| 51072 | 80735  |
| 17290 | 9139   |
| 32459 | 3697   |
| 5822  | 541    |
| 273   | 0      |
| 4275  | 997    |
| 24751 | 8224   |
| 3453  | 578    |
| 5536  | 2973   |
| 11248 | 384504 |
| 562   | 802    |
| 51654 | 9694   |
| 8900  | 1269   |
| 13434 | 917    |
| 1318  | 2196   |
| 19451 | 96391  |
| 23825 | 9547   |
| 23244 | 29207  |
| 27815 | 12107  |
| 12155 | 17742  |
| 36070 | 20515  |
| 11414 | 806    |
| 2933  | 0      |
| 1208  | 0      |
| 12091 | 5193   |
| 6238  | 144    |
| 29142 | 6825   |
| 11812 | 0      |

|        |        |
|--------|--------|
| 8922   | 76     |
| 6926   | 133595 |
| 100194 | 42465  |
| 22211  | 5706   |
| 35961  | 10951  |
| 8384   | 1919   |
| 18333  | 11013  |
| 16818  | 4080   |
| 17067  | 3063   |
| 15356  | 86     |
| 18394  | 19     |
| 20530  | 18722  |
| 43502  | 5067   |
| 2619   | 0      |
| 14921  | 8784   |
| 30296  | 21463  |
| 4188   | 0      |
| 25258  | 11415  |
